# Supplementary material for: Complementary therapies for clinical depression: an overview of systematic reviews
Source: PubMed Central journal article supplement — BMJ Open. 2019 Aug 5;9(8):e028527. doi: 10.1136/bmjopen-2018-028527 (PMC6686993; doi:10.1136/bmjopen-2018-028527), 2019-08-05
Supplement: bmjopen-2018-028527.draft_revisions.pdf [file bmjopen-2018-028527.draft_revisions.pdf]

# BMJ Open

BMJ Open is committed to open peer review. As part of this commitment we make the peer review history of every article we publish publicly available.

When an article is published we post the peer reviewers' comments and the authors' responses online. We also post the versions of the paper that were used during peer review. These are the versions that the peer review comments apply to.

The versions of the paper that follow are the versions that were submitted during the peer review process. They are not the versions of record or the final published versions. They should not be cited or distributed as the published version of this manuscript.

BMJ Open is an open access journal and the full, final, typeset and author-corrected version of record of the manuscript is available on our site with no access controls, subscription charges or pay-per-view fees (<http://bmjopen.bmj.com>).

If you have any questions on BMJ Open's open peer review process please email [info.bmjopen@bmj.com](mailto:info.bmjopen@bmj.com)

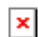

## Complementary therapies for clinical depression: an overview of systematic reviews

|                               |                                                                                                                                                                                                                                                                                                                                                                                                                                                                                           |
|-------------------------------|-------------------------------------------------------------------------------------------------------------------------------------------------------------------------------------------------------------------------------------------------------------------------------------------------------------------------------------------------------------------------------------------------------------------------------------------------------------------------------------------|
| Journal:                      | <i>BMJ Open</i>                                                                                                                                                                                                                                                                                                                                                                                                                                                                           |
| Manuscript ID                 | bmjopen-2018-028527                                                                                                                                                                                                                                                                                                                                                                                                                                                                       |
| Article Type:                 | Research                                                                                                                                                                                                                                                                                                                                                                                                                                                                                  |
| Date Submitted by the Author: | 12-Dec-2018                                                                                                                                                                                                                                                                                                                                                                                                                                                                               |
| Complete List of Authors:     | Haller, Heidemarie; Univ Duisburg Essen, Internal and Integrative Medicine, Kliniken Essen-Mitte<br>Anheyer, Dennis; University of Duisburg-Essen, Department of Internal and Integrative Medicine<br>Cramer, Holger; University of Duisburg-Essen, Department of Internal and Integrative Medicine, Kliniken Essen-Mitte, Faculty of Medicine<br>Dobos, Gustav; University of Duisburg-Essen, Department of Internal and Integrative Medicine, Kliniken Essen-Mitte, Faculty of Medicine |
| Keywords:                     | Depression, Complementary Therapies, Treatment Outcome, Safety, Systematic Review                                                                                                                                                                                                                                                                                                                                                                                                         |
|                               |                                                                                                                                                                                                                                                                                                                                                                                                                                                                                           |

SCHOLARONE™  
Manuscripts

1  
2 1 **Complementary therapies for clinical depression: an overview of systematic reviews**  
3

4 2

5  
6 3

7  
8 4 Heidemarie Haller<sup>1\*</sup>, Dennis Anheyer<sup>1</sup>, Holger Cramer<sup>1</sup>, Gustav Dobos<sup>1</sup>  
9

10  
11 5

12  
13 6 <sup>1</sup> Department of Internal and Integrative Medicine, Kliniken Essen-Mitte, Faculty of Medicine,  
14

15 7 University of Duisburg-Essen, Essen, Germany.  
16

17 8

18  
19 9

20  
21  
22 10

23  
24 11 \*Corresponding author

25  
26 12 Heidemarie Haller

27  
28  
29 13 Department of Internal and Integrative Medicine, Kliniken Essen-Mitte, Faculty of Medicine,  
30

31 14 University of Duisburg-Essen

32  
33 15 Am Deimelsberg 34a, 45276 Essen, Germany

34  
35 16 Tel: +4920117425044

36  
37 17 E-mail: h.haller@kem-med.com  
38  
39  
40  
41  
42  
43  
44  
45  
46  
47  
48  
49  
50  
51  
52  
53  
54  
55  
56  
57  
58  
59  
60

1  
2 **18 Abstract**  
3  
4

5 **19 Objectives:** As clinical practice guidelines vary widely in their search strategies and recommendations  
6  
7 **20** of complementary and alternative medicine (CAM) for depression, this overview aimed at  
8  
9 **21** systematically summarizing the level-1 evidence on CAM for patients with a clinical diagnosis of  
10  
11 **22** depression.  
12  
13

14 **23 Methods:** PubMed, PsycInfo and Central were searched for meta-analyses of randomized controlled  
15  
16 **24** trials (RCTs) until June 30, 2018. Outcomes included depression severity, response, remission,  
17  
18 **25** relapse, and adverse events. The quality of evidence was assessed according to GRADE considering  
19  
20 **26** the methodological quality of the RCTs (ROB) and meta-analyses (AMSTAR), inconsistency,  
21  
22 **27** indirectness, imprecision of the evidence, and the potential risk of publication bias.  
23  
24  
25

26 **28 Results:** The literature search revealed 26 meta-analyses conducted between 2002 and 2018 on 1 to  
27  
28 **29** 49 RCTs in major, minor, and seasonal depression. In patients with mild to moderate major  
29  
30 **30** depression, moderate quality evidence suggested the efficacy of St. John's wort towards placebo and  
31  
32 **31** its comparative effectiveness towards standard antidepressants for the treatment for depression  
33  
34 **32** severity and response rates, while St. John's wort caused significant less adverse events. In patients  
35  
36 **33** with recurrent major depression, moderate quality evidence showed that Mindfulness-based  
37  
38 **34** Cognitive Therapy was superior to standard antidepressant drug treatment for the prevention of  
39  
40 **35** depression relapse. Other CAM evidence was considered as having low or very low quality.  
41  
42  
43  
44

45 **36 Conclusions:** The effects of all but two CAM treatments found in studies on clinical depressed  
46  
47 **37** patients based on low to very low quality of evidence. The evidence has to be downgraded mostly  
48  
49 **38** due to avoidable methodological flaws of both the original RCTs and meta-analyses not following the  
50  
51 **39** CONSORT and PRISMA guidelines. Further research is needed.  
52  
53

54 **40 Keywords:** Depression, Complementary Therapies, Treatment Outcome, Safety, Systematic Review  
55  
56  
57  
58  
59  
60

1  
2 41 **Strengths and limitations of this study**  
3

- 4 42     ▪ This systematic overview included the comprehensive literature search of important CAM  
5  
6 43     topics defined by the Cochrane Collaboration.  
7  
8 44     ▪ The inclusion criteria were restricted to meta-analyses of RCTs of patients with a clinical  
9  
10 45     diagnosis of depression.  
11  
12  
13 46     ▪ The quality of evidence from meta-analyses was assessed according to GRADE.  
14  
15 47     ▪ There is a possible lack of evidence of newer RCTs that have not been analysed by the  
16  
17 48     included meta-analyses.  
18  
19  
20  
21  
22  
23  
24  
25  
26  
27  
28  
29  
30  
31  
32  
33  
34  
35  
36  
37  
38  
39  
40  
41  
42  
43  
44  
45  
46  
47  
48  
49  
50  
51  
52  
53  
54  
55  
56  
57  
58  
59  
60

## 49 Introduction

50 Depression is one of the most prevalent psychiatric disorders, with about 25% of women and 12% of  
51 men suffering from at least one depressive episode during their lifetime.<sup>1-3</sup> According to the criteria  
52 for diagnosis recommended by the American Psychiatric Association (APA), depressive disorders can  
53 be distinguished by their degree of severity or duration and are also characterized by a high  
54 comorbidity and an increase of psychological strain for the affected person.<sup>4</sup> It is evident, that a  
55 strong comorbid connection to several chronic conditions like addictions,<sup>5</sup> neurodegenerative  
56 diseases,<sup>6,7</sup> or different psychiatric diseases<sup>8-11</sup> exists. This leads depressive disorders as one of the  
57 leading causes of disability worldwide.<sup>12</sup>

58 The most commonly used treatments for depression are antidepressants, psychotherapy, or a  
59 combination of drugs and psychotherapy. While both therapies have been shown to be effective,<sup>13-15</sup>  
60 more recent meta-analyses also found high dropout and low remission rates<sup>16-21</sup> as well as clinically  
61 significant differences between antidepressant drugs and placebos only for patients at the upper end  
62 of the very severely depressed category.<sup>22</sup> This may lead patients to search for alternatives.

63 Increasing mainstream use of complementary and alternative medicine (CAM) support this trend,  
64 particularly for different physical conditions with comorbid affective disorders.<sup>23-27</sup> While some  
65 complementary therapies have become a promising adjunct in the standard treatment of  
66 depression,<sup>28,29</sup> others are known for their possible side effects or interactions with standard drugs.<sup>29</sup>

67 Recent clinical practice guidelines, in addition, vary widely in their search strategies and resulting  
68 recommendations for CAM treatments. While the ACP,<sup>30</sup> APA,<sup>31</sup> and CANMAT guideline<sup>32</sup> provide a  
69 more comprehensive overview and critical appraisal of CAM treatments, the DGPPN,<sup>33</sup> NICE,<sup>34</sup> and  
70 WFSBP<sup>35</sup> guidelines mainly focus on St. John's Wort and light therapy. Possible effects and risks of  
71 further CAM therapies are not discussed. Thus, the purpose of this overview is to provide a  
72 comprehensive search strategy of relevant CAM terms and systematically summarize the existing  
73 level-1 evidence for clinical depression as a basis for further guideline recommendations on the  
74 efficacy, effectiveness, and safety of CAM therapies.

## 75 **Methods**

76 This systematic overview of reviews was conducted in accordance with the Preferred Reporting Items  
77 for Systematic Reviews and Meta-Analyses (PRISMA) guidelines<sup>36 37</sup> and the recommendations of the  
78 Cochrane Collaboration.<sup>38</sup> The protocol was not prospectively registered in a database.

### 79 **Inclusion and exclusion criteria**

- 80 – Types of studies: To be eligible, articles had to be systematic reviews with meta-analyses of  
81 randomized controlled clinical trials (RCTs) published in peer-reviewed journals. Conference  
82 abstracts or unpublished work were excluded as well as reviews summarizing evidence  
83 narratively. In cases of including same or similar original studies, only the review with the  
84 most recent, most comprehensive search was included. When systematic reviews reported  
85 results of RCTs as well as of designs of lower evidence levels, they were considered only if  
86 separate meta-analyses for the included RCTs were performed.
- 87 – Types of participants: Only reviews of patients with a diagnosis of major depression or  
88 dysthymia were eligible as well as reviews including patients/general population samples  
89 with mild depressive symptoms above a clinical cut off or seasonal patterns. In contrast,  
90 reviews studying depressive symptoms within specific subpopulations of substance-induced  
91 or demented patients, secondary depression due to another medical condition (e.g. post-  
92 stroke, cancer, or pain patients), bipolar disorders, or females with premenstrual dysphoric  
93 disorder or postpartum depression were excluded. Further restrictions regarding the  
94 diagnostic criteria or procedures, regarding age, gender, duration of the condition, or  
95 symptom intensity were not applied.
- 96 – Types of interventions: Reviews investigating the effectiveness and/or safety of a single,  
97 adjunctive or combined CAM treatment were included. For the classification of CAM  
98 treatments the definition of the US National Institutes of Health<sup>39</sup> was followed. CAM  
99 interventions have to be compared against treatment as usual (TAU)/waiting list,  
100 placebo/sham, or standard medical care.

1  
2 101 – Types of outcomes: Reviews were eligible if they assessed at least one measure of  
3  
4 102 effectiveness such as severity of depressive symptoms, response rate (generally defined as a  
5  
6 103 50% decrease in depression scores after a period of up to 12 weeks of treatment),<sup>30</sup>  
7  
8 104 remission rate (generally defined as a period of up to 12 weeks during which a patient is  
9  
10 105 asymptomatic or has only few symptoms to a very mild degree).<sup>40</sup> relapse rates, and/or a  
11  
12 106 measure of safety such as number of adverse events (AE), drug interactions, or numbers  
13  
14 107 needed to harm for study withdrawal due to side effects.  
15  
16  
17

### 18 108 **Search strategy**

19  
20 109 Electronic literature was systematically searched via PubMed, PsycInfo and Central from their  
21  
22 110 inception to January 31, 2018 without restrictions regarding time or language (Table 1). Search terms  
23  
24 111 for CAM treatments were selected in accordance with Cochrane recommendations.<sup>41</sup> Additional  
25  
26 112 manual search included reference lists of previously published reviews<sup>14 28 29 42</sup> and clinical practice  
27  
28 113 guidelines.<sup>30-35</sup> Using PubMed Informer,<sup>43</sup> the search was updated until June 30, 2018.  
29  
30  
31

### 32 114 **Study selection process**

33  
34 115 To assess eligibility, articles were selected by screening titles and abstracts independently by two  
35  
36 116 authors (HH and DA). Any abstract considered potentially eligible by at least one author was read in  
37  
38 117 full to decide on its eligibility. Disagreements were rechecked with a third author (HC) until  
39  
40 118 consensus was achieved.  
41  
42  
43

### 44 119 **Data extraction and quality assessment**

45  
46 120 Two authors (HH and DA) independently extracted data on the characteristics of the reviews  
47  
48 121 including the type of the intervention, the year of publication, the number and quality of the original  
49  
50 122 RCTs, the total number and age of the participants, and effectiveness and safety outcomes. The  
51  
52 123 quality of the included reviews was assessed using the Assessment of the Methodological Quality of  
53  
54 124 Systematic Reviews (AMSTAR) tool.<sup>44</sup> The AMSTAR tool consists of 11 items asking about important  
55  
56 125 methodological quality criteria of systematic reviews such as: a published apriori design, duplicate  
57  
58 126 study selection and data extraction, a comprehensive literature search including grey literature, a list  
59  
60 127 of included and excluded studies, summarized characteristics and quality assessment of included



1  
2 128 studies, assessment of publication bias, appropriate method of data syntheses and deducing  
3  
4 129 conclusions, and a conflict of interests statement. AMSTAR has shown good construct validity and  
5  
6 130 inter-rater reliability. The Intraclass Correlation Coefficient (ICC) of the total AMSTAR score of 11  
7  
8 131 points was reported as 0.84.<sup>45</sup> For this analysis, the two authors (HH and DA) who independently  
9  
10 132 assessed AMSTAR reached an ICC of 0.96. Disagreements regarding content or quality of the reviews  
11  
12  
13 133 were rechecked with a third author (HC) and resolved by agreement.

#### 16 134 **Data synthesis**

17  
18  
19 135 Results were pooled qualitatively by type of the intervention. Outcomes had to be calculated as  
20  
21 136 standard mean differences (SMDs), risk ratios (RRs), hazard ratios (HR), or odds ratios (ORs). If meta-  
22  
23 137 analyses displayed mean differences (MDs), SMDs were calculated using Review Manager Software  
24  
25 138 (RevMan, Version 5.3, The Nordic Cochrane Centre, Copenhagen) for better comparability of the  
26  
27  
28 139 results. RevMan was also used to exclude SMDs/RRs/HRs/ORs of selective RCTs that did not fulfil  
29  
30 140 eligibility criteria of this overview. Effect sizes were classified according to Cohen as SMD = 0.2 – 0.5 =  
31  
32 141 small effect, SMD = 0.5 – 0.8 = medium effect, and SMD > 0.8 = large effect <sup>46</sup> with higher reduction  
33  
34 142 of/improvement in depression scores represented by more negative SMDs or RRs/HRs/ORs less than  
35  
36  
37 143 1. According to the NICE guideline, a SMD of  $\geq 0.5$  was considered as a clinically relevant reduction of  
38  
39 144 depression severity.<sup>47</sup> Statistical heterogeneity between studies was assessed by Chi<sup>2</sup> statistics with a  
40  
41 145 p-value of  $\leq .10$  indicating significant heterogeneity. The magnitude of heterogeneity was categorized  
42  
43 146 by I<sup>2</sup> statistics with I<sup>2</sup> > 25% = moderate heterogeneity, I<sup>2</sup> > 50% = substantial heterogeneity, and I<sup>2</sup> >  
44  
45 147 75% = considerable heterogeneity.<sup>38</sup>

#### 48 148 **Quality of evidence**

49  
50  
51 149 The quality of evidence was assessed according to the Grades of Recommendation, Assessment,  
52  
53 150 Development, and Evaluation (GRADE) approach<sup>48</sup> individually by two authors (HH and DA).  
54  
55  
56 151 Disagreements were rechecked with a third author (HC) until consensus was achieved. For each  
57  
58 152 outcome, the evidence can be graded as high, moderate, low or very low. Evidence from RCTs is  
59  
60 153 initially assessed as high, but can be downgraded by one level for serious or two levels for very

1  
2 154 serious limitations of the study quality (of both RCTs and meta-analyses), inconsistency of the results,  
3  
4 155 indirectness of the evidence, imprecision of the results, and a potential risk of publication bias.<sup>48</sup>  
5  
6  
7

## 8 156 **Results**

### 9 10 157 **Study selection**

11  
12 158 A total of 3582 potentially eligible articles were identified by electronic database search. One  
13  
14 159 additional review was retrieved from manual search,<sup>49</sup> one from the updated search until June  
15  
16 160 2018.<sup>50</sup> After removing duplicates, 2639 articles were excluded by screening of titles and abstracts.  
17  
18 161 The remaining 117 articles were read in full, of which further 91 reviews had to be excluded (Figure  
19  
20 162 1). Reasons for exclusion comprised 55 reviews where newer and/or more comprehensive reviews  
21  
22 163 on higher quality evidence were available.<sup>49 51-104</sup> Further 15 reviews have to be excluded as they  
23  
24 164 systematically summarized evidence but did not performed a meta-analysis mostly due to clinical  
25  
26 165 heterogeneity or a limited number of available RCTs.<sup>105-119</sup> Eight reviews were excluded as they  
27  
28 166 included mixed depressive samples of bipolar or postpartum cases and did not provide (data for)  
29  
30 167 subgroup analyses for patients with the defined depression criteria.<sup>120-127</sup> Another six reviews  
31  
32 168 contained community samples with non-clinical depression or physically ill patients with comorbid  
33  
34 169 depressive symptoms but displayed no data for patients with a primary diagnosis of depression.<sup>128-133</sup>  
35  
36 170 Four reviews performed meta-analyses on both RCTs and non-RCTs and did not perform subgroup  
37  
38 171 analyses or extracted sufficient data for post hoc analyses.<sup>134-137</sup> Three of the reviews analysed  
39  
40 172 standard instead of complementary therapies and were therefore be excluded. Finally, 26 meta-  
41  
42 173 analyses could be included and reviewed.<sup>50 138-162</sup>  
43  
44  
45  
46  
47  
48

### 49 174 **Review characteristics and quality**

50  
51 175 Characteristics and quality appraisal of the included meta-analyses are summarized in the  
52  
53 176 Supplementary Table 1. Meta-analyses were conducted between 2002 and 2018 and included  
54  
55 177 between 1 to 49 RCTs on 40 to 7104 adult patients. Meta-analyses on children and adolescents were  
56  
57 178 not available or did not meet inclusion criteria. Samples mostly consisted of patients suffering from  
58  
59 179 major depressive disorder<sup>139-142 144-150 153 155 156 158 159</sup> but also included patients with mixed diagnoses  
60

1  
2 180 of non-seasonal depression,<sup>50 152 161 162</sup> patients with a diagnosis of seasonal depression,<sup>151</sup> and  
3  
4 181 patients with mild to severe symptoms of depression above a clinical cut-off.<sup>138 140 143 144 150 154 156 157</sup> All  
5  
6 182 but one meta-analysis<sup>140</sup> reported pooled outcomes based on common standardized questionnaires  
7  
8 183 or diagnostic interviews. Effects were analysed mostly up to 12 weeks of treatment (short-term),  
9  
10 184 except for four meta-analyses that included RCTs with effects reported up to 16, 24, or 32 weeks<sup>50 141</sup>  
11  
12  
13 185 <sup>142 150 159</sup> and further three meta-analyses with long-term analyses equal to or greater than one year  
14  
15 186 <sup>148 156 162</sup>. The AMSTAR total scores of the included meta-analyses ranged between 4 and 11 points  
16  
17 187 with a median quality of 7 points. The individual AMSTAR-ratings are reported in the Supplementary  
18  
19  
20 188 Table 2.

## 189 **Synthesis of results**

### 190 ***Acupuncture***

#### 191 *Manual acupuncture*

192 A high-quality Cochrane review meta-analysed 49 RCTs in major depressed adults as well as those  
193 with clinically relevant symptoms of depression for manual acupuncture.<sup>50</sup> For depression severity,  
194 significant effect sizes were found in comparisons to TAU and as in adjunction to standard  
195 antidepressants, while acupuncture showed similar effects to invasive sham acupuncture and  
196 standard antidepressants (Figure 2). The analyses of remission rates did not reveal superiority of  
197 acupuncture in the comparisons to TAU, invasive sham, standard antidepressants or in adjunction to  
198 standard antidepressants (Figure 4). Adverse events reported in the acupuncture groups were  
199 significantly lower than in patients treated with antidepressant drugs. However, most meta-analyses  
200 showed significant heterogeneity, a lack of RCTs with low risk of bias and a possibly serious risk of  
201 publication bias. Thus, the quality of evidence had to be downgraded to low and very low.

#### 202 *Electroacupuncture*

203 For electroacupuncture, the same Cochrane review<sup>50</sup> revealed very low quality of evidence for the  
204 comparisons to TAU and invasive sham for both outcomes, severity (Figure 2) and remission (Figure  
205 4), because of serious limitations of the quality of the RCTs, imprecision, and a high risk of publication

1  
2 206 bias. For electroacupuncture monotherapy in comparison to standard antidepressants, low quality  
3  
4 207 evidence homogeneously suggested significant greater effects for severity and similar effects for  
5  
6 208 remission. As an adjunctive treatment to antidepressants, electroacupuncture effectiveness was  
7  
8 209 supported by low quality of evidence showing a significant greater consistent and precise effect for  
9  
10 210 depression severity. Although the mean adjunctive effect can be considered as large, the analysis  
11  
12 211 based on only one RCT with overall low risk of bias and 4 RCTs of lower methodological quality that  
13  
14 212 missed to include adjunctive sham acupuncture. For remission rates, very low quality of evidence  
15  
16 213 suggested no effects in adjunction to antidepressants. In addition, one RCT showed significant less  
17  
18 214 AEs when electroacupuncture was added to standard antidepressants.  
19  
20  
21

### 22 215 **Aromatherapy**

23  
24  
25 216 The literature search revealed no meta-analysis on aromatherapy. A recent systematic review  
26  
27 217 detected no RCTs in patients with a primary diagnosis of depression. However, two out of five of the  
28  
29 218 reviewed studies on inhalation aromatherapy and five out of eight studies on aromatherapy massage  
30  
31 219 have found significant anti-depressive effects in mixed patient samples and healthy adults.<sup>116</sup>  
32  
33  
34

### 35 220 **Biofeedback**

36  
37  
38 221 No meta-analysis on biofeedback was conducted to date. A recent systematic review revealed only  
39  
40 222 one RCT on the defined inclusion criteria for depression showing some effects in contrast to sham  
41  
42 223 psychotherapy.<sup>117</sup>  
43  
44

### 45 224 **Herbs**

#### 46 225 *St. John's wort (Hypericum perforatum)*

47  
48  
49  
50  
51 226 The effectiveness of St. John's wort was meta-analysed by a Cochrane review of 29 RCTs<sup>149</sup> and a  
52  
53 227 more recent, higher quality meta-analysis of 35 RCTs.<sup>141</sup> In comparison to placebo, St. John's wort  
54  
55 228 showed moderate quality evidence of significant greater reductions of depression severity (Figure 2)  
56  
57 229 and response rates (Figure 3). The evidence had to be downgraded due to significant heterogeneity  
58  
59 230 because of higher effects in studies from German-speaking countries than in those from the US or  
60  
231 other European countries. In contrast, very low quality of evidence suggested no superiority to

1  
2 232 placebo for remission (Figure 4) and response rates (Figure 5). In comparison to standard  
3  
4 233 antidepressants, St. John's wort showed comparable severity reductions, response, remission, and  
5  
6 234 relapse rates. The quality of the evidence of the meta-analyses of severity and relapse rates had to  
7  
8 235 be downgraded to low and very low, respectively. The evidence of the response and remission rates  
9  
10 236 was considered as moderate quality showing the same results in both German and studies from  
11  
12 237 other countries but containing some RCTs with unclear risk of selection bias and detection bias.  
13  
14 238 Moreover, both meta-analyses<sup>141 149</sup> showed similar AEs of St. John's wort to placebo but significant  
15  
16 239 less AEs than standard antidepressants.

#### 20 240 *Saffron (Crocus sativus)*

23 241 A moderate-quality meta-analysis examined the effectiveness and safety of saffron on depression  
24  
25 242 severity by including 5 RCTs in adult patients with major depression.<sup>146</sup> It revealed very low quality of  
26  
27 243 evidence for significant greater effects versus placebo and similar effects versus antidepressant  
28  
29 244 medication up to 8 weeks of treatment (Figure 2). No serious adverse events were reported, but  
30  
31 245 patients receiving saffron tend to report more adverse events than those receiving placebo and less  
32  
33 246 adverse events than those receiving antidepressant medication. Reasons for downgrading the  
34  
35 247 evidence included no replication of the results (all included RCTs were conducted by the same  
36  
37 248 research group), the small overall sample size, and the possibly high risk of publication bias.

#### 42 249 *Curcumin (Curcuma longa)*

45 250 For the intake of curcumin, a moderate-quality meta-analysis<sup>154</sup> revealed very low quality of evidence  
46  
47 251 suggesting a small but significant short-term effect of low heterogeneity on depression severity by  
48  
49 252 pooling 6 RCTs (Figure 2). No serious adverse events were recorded. Evidence had to be downgraded  
50  
51 253 due to unclear risk of selection, performance, detection, attrition, and reporting bias in over the half  
52  
53 254 of the included RCTs, the imprecision of the pooled effect and the possibly high risk of publication  
54  
55 255 bias.

#### 59 256 *Traditional Chinese herbs*

1  
2 257 A comprehensive but low-quality systematic review of 296 RCTs of *Chinese herbal medicine* formulas  
3  
4 258 and single herbs<sup>161</sup> revealed 21 RCTs of mostly unclear to high risk of selection, performance, and  
5  
6 259 detection bias and a serious risk of publication bias. Therefore, the evidence supporting the superiority  
7  
8 260 above placebo and the similarity towards standard antidepressants regarding depression severity  
9  
10  
11 261 (Figure 2) and response rates (Figure 3) was assessed as very low.  
12

#### 13 14 262 *Other herbs*

15  
16 263 For other than the described herbs, no meta-analyses were conducted to date. However, a  
17  
18 264 systematic review<sup>109</sup> found three single RCTs that showed significant improvement in depressive  
19  
20 265 symptoms for *Lavandula angustifolia* as an adjunctive treatment to standard antidepressant drugs  
21  
22 266 versus antidepressant drugs alone and for *Echium amoenum* and *Rhodiola rosea* versus placebo. No  
23  
24 267 serious adverse events were reported.  
25  
26  
27

#### 28 268 *Homoeopathy*

29  
30  
31 269 No meta-analysis on *homoeopathic remedies* for depression were conducted yet. A recent systematic  
32  
33 270 review detected no placebo-controlled RCTs in patients with a primary diagnosis of depression.<sup>128</sup>  
34  
35

#### 36 271 *Hypnosis*

37  
38  
39 272 No meta-analysis on *hypnosis* or *self-hypnosis* techniques met the inclusion criteria of this overview.  
40  
41 273 The only available review on this topic<sup>126</sup> included 6 RCTs among which only one RCT included adults  
42  
43 274 with mild primary depression. Within the mixed sample of physically ill patients and healthy adults,  
44  
45 275 (self-)hypnosis appeared to be effective in decreasing depressive symptoms.  
46  
47  
48

#### 49 276 *Light therapy*

50  
51  
52 277 A high-quality Cochrane review meta-analysed the effects of *bright light therapy* in adjunction to  
53  
54 278 standard antidepressants versus sham light therapy plus antidepressants on severity and response  
55  
56 279 rates in patients suffering from non-seasonal depression.<sup>160</sup> By pooling 18 RCTs of overall unclear risk  
57  
58 280 of bias, it revealed very low quality of evidence for a significant small but inconsistent and imprecise  
59  
60 281 effect on depression severity (Figure 2). A subgroup analysis of two RCTs with low risk of selection

1  
2 282 bias and detection bias revealed a significant large effect on depression severity but based on one  
3  
4 283 non-peer-reviewed publication and one RCT that also included bipolar patients. Response rates did  
5  
6 284 not significantly differ between groups (Figure 3). Adverse events were reported non-systematically  
7  
8 285 but appeared to be comparable to sham light therapy except for hypomania that occurred more  
9  
10  
11 286 often under verum light therapy.<sup>160</sup>

12  
13  
14 287 For patients with seasonal patterns of depression, a meta-analysis of 8 RCTs<sup>151</sup> revealed very low  
15  
16 288 quality of evidence for a significant medium effect on depression severity of light monotherapy in  
17  
18 289 comparison to sham light therapy (Figure 2). Risk of bias of individual RCTs, heterogeneity, and safety  
19  
20 290 were not analysed leading to an overall low quality of the meta-analysis and downgrading of the  
21  
22 291 evidence.

### 25 292 **Massage therapy**

26  
27  
28 293 The literature search detected no meta-analysis of *massage therapy* in patients with a primary  
29  
30 294 depression. However, massage therapy appeared to be effective in decreasing depressive symptoms  
31  
32 295 in mixed samples of physically ill patients and healthy adult.<sup>132</sup> Future research will show, whether  
33  
34 296 these results may be transferable to primary depressed cases.

### 37 297 **Meditative movement therapies**

#### 40 298 *Dance therapy*

41  
42  
43  
44 299 Short-term effects of improvisatory or structured *dance therapy* as a combination of movement-  
45  
46 300 based work, interactive group components and insight/expressive methods were meta-analysed by a  
47  
48 301 Cochrane review of high methodological quality.<sup>152</sup> It revealed a significant large pooled effect size  
49  
50 302 for depression severity as an adjunctive treatment option to standard medical/psychotherapeutic  
51  
52 303 care based on two RCTs (Figure 2). Although the meta-analyses contained no heterogeneity and no  
53  
54 304 imprecise CI, the evidence had to be downgraded because of mostly unclear/high risk of bias of one  
55  
56 305 of the RCTs as well as the overall small sample size.

#### 57 306 *Chinese movement therapies*

1  
2 307 A low-quality meta-analysis on Chinese meditative movement therapies revealed 30 RCTs, of which 2  
3  
4 308 RCTs on *Qi Gong* and 3 RCTs on *Tai Chi* met inclusion criteria for patients with mild to severe  
5  
6 309 symptoms of primary depression.<sup>150</sup> Very low quality of evidence suggested significant short-term  
7  
8 310 effects for Qi Gong but not for Tai Chi in comparison to TAU. The evidence had to be downgraded  
9  
10  
11 311 due to very serious limitations of the quality of the RCTs and the meta-analysis, significant  
12  
13 312 heterogeneity, imprecision, and a possible high risk of publication bias.

### 16 313 *Yoga*

17  
18  
19 314 A high-quality meta-analysis of complex *yoga* interventions for various depressive disorders found 12  
20  
21 315 RCTs,<sup>144</sup> of which 5 RCTs of mostly unclear risk of bias met the inclusion criteria of this overview. The  
22  
23 316 pooled short-term effect on depression severity was of large size in comparison to TAU and medium  
24  
25 317 size in comparison to standard exercises (Figure 2). However, the evidence was assessed as very low  
26  
27 318 due to serious limitations of quality of the RCTs, significant heterogeneity, imprecision, and a possible  
28  
29 319 high risk of publication bias.

30  
31  
32  
33 320 A further systematic review of yoga in major depressive disorder, revealed 5 newer yoga RCTs but did  
34  
35 321 not perform a meta-analysis because of high clinical heterogeneity. Risk of bias was comparably high  
36  
37 322 and evidence mostly conflicting.<sup>106</sup>

### 40 323 ***Mindfulness-based interventions***

#### 43 324 *Mindfulness-based Cognitive Therapy (MBCT)*

44  
45  
46 325 A low-quality meta-analysis of mindfulness-based interventions in patients with major depression  
47  
48 326 found 4 RCTs investigating the effects of MBCT and Cognitive Behavioural Therapy (CBT) on depression  
49  
50 327 severity.<sup>158</sup> It revealed a significant large short-term effect of MBCT in comparison to TAU and similar  
51  
52 328 effects in comparison to CBT (Figure 2). However, the quality of the evidence was considered as very  
53  
54 329 low due to the missing risk of bias assessment, inconsistency, and imprecision.

55  
56  
57  
58 330 A further moderate-quality systematic review on MBCT meta-analysed 9 RCTs on an individual patient  
59  
60 331 data level.<sup>148</sup> The sample consisted of patients with recurrent major depression currently in remission.  
332 After a period of 60 weeks, MBCT showed a significantly reduced risk of depressive relapse compared



333 to those receiving antidepressant drugs (Figure 5). No serious adverse events were reported. The  
334 evidence was assessed as moderate due to a possibly serious risk of publication bias.

#### 335 *Mindfulness-based stress reduction (MBSR)*

336 RCTs of MBSR and MBSR-like interventions were meta-analysed by a recent review<sup>143</sup> showing a  
337 significant large short-term effect on depression severity in comparison to TAU and enhanced TAU  
338 (Figure 2). The quality of the evidence was assessed as low because of the overall unclear risk of  
339 selection and performance bias and significant heterogeneity.

#### 340 *Music therapy*

341 Studies on active and receptive *music therapy* in older patients with a diagnosis of depression were  
342 summarized by a recent moderate-quality meta-analysis.<sup>162</sup> Out of 19 RCTs, 8 met the inclusion  
343 criteria for this overview. Pooled analyses of 5 of them revealed a significant medium effect size on  
344 depression severity against TAU up to 52 weeks, however with bigger short-term than long-term  
345 effects, considerable heterogeneity and overall unclear risk of selection, performance and detection  
346 bias resulting in very low quality of evidence. Further 3 RCTs of the same review revealed low quality  
347 evidence for a significant large consistent and precise effect of music therapy as an adjunctive  
348 treatment to antidepressants (Figure 2).

349 A newer Cochrane review<sup>138</sup> found 8 different RCTs showing a significant large pooled effect of music  
350 therapy on depression severity against TAU and similar effects as CBT (Figure 2). However, both  
351 analyses revealed very low quality of evidence due to mostly unclear selection, performance,  
352 detection and reporting bias, significant heterogeneity, and imprecision.

#### 353 *Nutrition therapy*

354 No meta-analyses on specific diets for patients with depression were published to date. A systematic  
355 review of 11 RCTs on whole-diet interventions in mostly healthy patients with subthreshold physical  
356 conditions revealed conflicting evidence on the effectiveness of those intervention for the reduction  
357 of depressive symptoms.<sup>114</sup>

1  
2 358 A further systematic review on fasting in patients with chronic pain and inflammatory diseases<sup>110</sup>  
3  
4 359 included 1 RCT and 7 observational studies, which showed promising short-term but questionable  
5  
6 360 longer-term anti-depressive effects.  
7

### 8 9 361 ***Religious/spiritual Interventions***

10  
11  
12 362 Very low to low quality of evidence was found by a moderate-quality systematic review of 9 RCTs on  
13  
14 363 Christian, Muslim, and spiritual CBT adaptations.<sup>140</sup> The analyses showed significant greater medium  
15  
16 364 effects on depression severity against TAU and standard CBT (Figure 2). Safety data were not  
17  
18 365 reported.  
19

### 20 21 22 366 ***Supplements***

#### 23 24 25 367 *Inositol*

26  
27  
28 368 A low quality meta-analysis of 2 RCTs in patients with major depression<sup>153</sup> revealed very low quality  
29  
30 369 evidence for inositol as adjunctive to standard antidepressants versus placebo in combination to standard  
31  
32 370 antidepressants (Figure 2).  
33

#### 34 35 371 *Magnesium*

36  
37  
38 372 No meta-analysis of magnesium supplementation was found. A recent systematic review detected no  
39  
40 373 RCTs in patients with a primary diagnosis of depression<sup>107</sup>.  
41

#### 42 43 374 *Omega-3 fatty acids*

44  
45  
46 375 A high-quality Cochrane review<sup>142</sup> of 26 RCTs found conflicting evidence of the effectiveness of  
47  
48 376 supplementation with omega-3 fatty acids versus placebo in patients with major depression as  
49  
50 377 depression severity significantly improved while response and remission rates did not so (Figure 2-4).  
51

52  
53 378 One additional RCT with a very low sample size showed similar effects of omega-3 fatty acids on  
54  
55 379 severity and response rates in comparison to antidepressant drug treatment (Figure 2 and 3).  
56

57 380 However, all meta-analyses were based on very low quality of evidence because of limitations of the  
58  
59 381 study quality, significant heterogeneity, imprecision and a possibly high risk of publication bias.  
60

#### 382 *Probiotics*

1  
2 383 The effectiveness of the supplementation with probiotics on depression severity was analysed by a  
3  
4 384 moderate-quality meta-analysis of 5 RCTs, of which only one RCT with overall low risk of bias was  
5  
6 385 carried out on patients with major depression.<sup>147</sup> The analysis of the RCT revealed a significant  
7  
8 386 medium but imprecise short-term effect in comparison to placebo (Figure 2). This led to overall very  
9  
10  
11 387 low quality of evidence for probiotics supplementation.

#### 12 13 14 388 *S-adenosyl methionine (SAME)*

15  
16  
17 389 A high-quality Cochrane review<sup>145</sup> of the effectiveness and safety of SAME supplementation on  
18  
19 390 depression severity revealed 2 RCTs of low risk of bias that showed no significant pooled effects for  
20  
21 391 SAME monotherapy versus placebo. One RCT, also of low risk of bias showed a significant medium  
22  
23 392 short-term effect as adjunctive to standard antidepressant medication, both for depression severity.  
24  
25 393 Further 5 RCTs, which were rated as having overall unclear risk of bias, showed similar pooled effects  
26  
27 394 of SAME monotherapy on depression severity compared to standard antidepressant medication  
28  
29 395 (Figure 2). Original RCTs reported safety issues insufficiently. For all meta-analyses, the evidence was  
30  
31 396 assessed as low to very low quality because of limitations of the study quality, heterogeneity,  
32  
33 397 imprecision, and a possibly high risk of publication bias.

#### 34 35 36 37 398 *Tryptophan*

38  
39  
40 399 A moderate-quality Cochrane review found 2 RCTs investigating the effectiveness and safety of  
41  
42 400 tryptophan supplementation on depression severity.<sup>157</sup> Pooling the effects led to significant greater  
43  
44 401 short-term response rates (Figure 3) as well as significant more adverse events in the tryptophan  
45  
46 402 group than in the placebo group. The evidence was assessed as very low quality because of an  
47  
48 403 unclear risk of detection, attrition and other bias, imprecision, and a possible risk for publication bias.

#### 49 50 51 52 404 *Vitamins*

53  
54  
55 405 For Vitamin B6, no meta-analysis was available. A systematic review without meta-analysis revealed  
56  
57 406 2 RCTs showing no significant effects when compared to placebo.<sup>119</sup>

58  
59  
60 407 Two further moderate to high-quality meta-analyses examined the effects of vitamin B9 (Folate) for  
408 major depressive patients. While a Cochrane review<sup>159</sup> calculated a significant medium effect size of

1  
2 409 folate-intake as an adjunctive intervention to standard drug treatment on depression severity, a  
3  
4 410 more recent review<sup>139</sup> revealed non-significant differences on severity and response rates (Figure 2  
5  
6 411 and 3). In contrast, a long-term combined intake of Vitamin B6, B9, and B12 was found to be  
7  
8 412 effective for relapse prevention after remission of symptoms as a result of one RCT (Figure 5).<sup>139</sup>  
9  
10 413 However, all comparisons were based on very low quality of evidence mostly due to significant  
11  
12 414 heterogeneity, imprecision, and possible high risk of publication bias.

15  
16 415 Another moderate-quality meta-analysis revealed evidence of the effectiveness of vitamin D-intake  
17  
18 416 on depression severity in comparison to placebo.<sup>156</sup> The analysis of the two included RCTs revealed a  
19  
20 417 significant medium short-term effect in favour of vitamin D in major depressed patients up to 8  
21  
22 418 weeks (Figure 2). The quality of evidence was rated as very low due to limitations of the study  
23  
24 419 quality, missing values of heterogeneity, imprecision, a high risk of publication bias as well as  
25  
26 420 insufficient reporting of adverse events.

#### 30 421 *Zinc*

31  
32  
33 422 The effectiveness of zinc for major depression was meta-analysed by a low-quality review of 3  
34  
35 423 RCTs.<sup>155</sup> It revealed a significant pooled short-term effect of medium size and low heterogeneity  
36  
37 424 when zinc was taken as an adjunctive to standard antidepressant drug treatment (Figure 2).  
38  
39 425 However, the available evidence had to be assessed as very low as the meta-analysis did not perform  
40  
41 426 risk of bias assessments and did not report adverse events.

#### 45 427 **Discussion**

46  
47  
48 428 This systematic review provided a comprehensive overview of the evidence of CAM treatments for  
49  
50 429 patients with a diagnosis or clinical symptoms of depression. Moderate quality evidence suggested  
51  
52 430 the efficacy, comparative effectiveness to standard antidepressants, and safety of St. John's wort on  
53  
54 431 depression severity and response rates. For remission and relapse rates, the evidence was conflicting  
55  
56 432 and of lower quality. Moreover, moderate quality evidence showed that MBCT was superior to  
57  
58 433 standard antidepressant drug treatment for the prevention of depression relapse in patients with  
59  
60 434 recurrent major depression. Low quality evidence suggested significant greater effects in favour of

1  
2 435 electroacupuncture in comparison to standard antidepressants alone and in adjunction to standard  
3  
4 436 antidepressants for depression severity. For remission rates, low quality evidence revealed  
5  
6 437 comparable effects of electroacupuncture and standard antidepressants. Further significant greater  
7  
8 438 effects, which based on low quality evidence, were found for MBSR versus TAU, music therapy in  
9  
10 439 adjunction to standard antidepressants, faith-adapted CBT versus CBT, and SAME versus standard  
11  
12 440 antidepressants. Other treatments such as manual acupuncture, aromatherapy, biofeedback, herbs  
13  
14 441 (crocus sativus, curcuma longa, traditional Chinese herbs, lavandula angustifolia, echium amoenum,  
15  
16 442 rhodiola rosea), Homoeopathy, hypnosis, bright light therapy, massage, meditative movement  
17  
18 443 therapies (dance therapy, Qi Gong, Tai Chi, yoga), whole-diet interventions, fasting, and  
19  
20 444 supplementation with inositol, magnesium, omega-3 fatty acids, probiotics, tryptophan, B- and D-  
21  
22 445 vitamins, and zinc were based on very low quality of evidence or no level-1 evidence.  
23  
24  
25

26  
27 446 The strengths of the review process included the comprehensive literature search based on a  
28  
29 447 structured list of CAM specific topics, which had been operationalized for the Cochrane  
30  
31 448 Collaboration.<sup>41</sup> It therefore included evidence for more than the previously considered CAM  
32  
33 449 approaches and provided systematic information where further high-quality studies are required. In  
34  
35 450 addition, we only included results of RCTs of patients with a diagnosis of depression or clinical  
36  
37 451 relevant depressive symptoms and excluded RCTs on samples with minor or secondary symptoms of  
38  
39 452 depression by newly calculating effect sizes. Finally, we rated AMSTAR and considered the quality of  
40  
41 453 the meta-analyses as well when grading the quality of the evidence.  
42  
43  
44

45  
46 454 The conclusions derived from this overview are limited due to possibly missing evidence from newer  
47  
48 455 RCTs, which have not been summarized by the included systematic reviews and meta-analyses. As it  
49  
50 456 was not within the scope of this overview, we did not separately search for individual RCTs. We also  
51  
52 457 did not include meta-analyses on observational studies of depression risk that may include bigger  
53  
54 458 samples and may provide additional information about further possible treatment approaches.

55  
56  
57 459 Another reason that limits the quality of evidence consists in the unsatisfactory methodological  
58  
59 460 quality of some of the included meta-analyses. Although the methodological quality of the original  
60  
461 RCTs might be acceptable, the bad reporting of some meta-analyses led to downgraded evidence. In

1  
2 462 particular, meta-analyses often missed to search for grey literature, cite excluded studies, adequately  
3  
4 463 assess risk of bias of the original studies, and report complete  $I^2$  statistics. As the latter are known to  
5  
6 464 be unstable in meta-analyses with a small numbers of studies,<sup>163</sup> calculating confidence intervals for  
7  
8 465  $I^2$  should be standard. Moreover, RCTs as well as meta-analyses often missed to systematically report  
9  
10 466 on occurred adverse events, which also limits the significance of the conclusions. In RCTs of non-  
11  
12 467 pharmacological interventions, there is always a high or unclear risk of performance bias and possibly  
13  
14 468 high placebo effects. As such, adding credible sham interventions, controlling for patients'  
15  
16 469 expectancies, and performing of ITT analyses is indispensable. However, meta-analyses mostly did not  
17  
18 470 systematically assess these issues. In general, it should be noticed that all evidence is based on short-  
19  
20 471 term pooled effects, except for meta-analyses of St. John's wort, MBCT, music therapy, and B- and D-  
21  
22 472 vitamins that also provided longer-term follow-up data.

23  
24  
25  
26  
27 473 Clinical recommendations for patients should follow the country-specific clinical practice guidelines  
28  
29 474 considering the quality of evidence, the accessibility of the treatment, costs, and the preferences of  
30  
31 475 the patients. While the guidelines agree<sup>30 31 33-35 164 165</sup> that clinicians should select between either CBT  
32  
33 476 or second-generation antidepressant drugs for the treatment of major depression, the restricted  
34  
35 477 search strategy of some of the guidelines might limit their recommendations for CAM treatments.  
36  
37 478 For patients who do reject or do not tolerate standard antidepressant drugs, one alternative  
38  
39 479 treatment option may be St. John's wort. It is also recommended by the American Psychiatric  
40  
41 480 Association Task Force report<sup>42</sup> and the CANMAT Depression Work Group<sup>32</sup> as being proven  
42  
43 481 sufficiently for the short-term by placebo-controlled and equivalence trials with standard  
44  
45 482 antidepressants for mild to moderate major depression. Particularly for bridging the gap between  
46  
47 483 diagnosis and getting access to psychotherapy and meanwhile reducing/not-worsening depression  
48  
49 484 severity, St. John's wort may be considered as a possibly better tolerated alternative to standard  
50  
51 485 antidepressant drugs.<sup>166</sup> As St. John's wort is accessible without prescription and currently not  
52  
53 486 regulated by the US Food and Drug Administration, we agree with the ACP guidelines<sup>30</sup> that it  
54  
55 487 remains difficult for patients to obtain quality-controlled remedies. Moreover, St. John's wort is  
56  
57 488 associated with numerous herb-to-drug interactions.<sup>167</sup> Therefore, we would recommend clinicians

1  
2 489 to educate their patients about possible effects, side effects and interactions who in turn should not  
3  
4 490 take St. John's wort without professional advise.<sup>33</sup> Despite those limitations, we would not  
5  
6 491 discourage a general therapeutic attempt with St. John's wort, even if we disagree with the NICE  
7  
8 492 guideline in this point.<sup>34</sup> Clinicians may also inform patients with recurrent major depression  
9  
10 493 currently in remission about the superiority of MBCT in comparison to standard antidepressants for  
11  
12 494 relapse prevention.<sup>31-34</sup> Finally, patients should also be informed that many other CAM treatments  
13  
14 495 might show promising effects but cannot be recommended until further higher-quality studies will  
15  
16 496 confirm their effectiveness and safety.  
17  
18  
19  
20 497 Further research is needed, particularly for interventions that have shown preliminary evidence for  
21  
22 498 reducing secondary symptoms of depression, promising short-term but no longer-term effects, or  
23  
24 499 insufficient evidence due to low methodological quality of the original RCTs and/or the performed  
25  
26 500 meta-analyses. Reporting of clinical trials and meta-analyses should necessarily follow the  
27  
28 501 CONSORT<sup>168</sup> and PRISMA guidelines,<sup>36</sup> respectively, including rigorous documentation and analysis of  
29  
30 502 adverse events. Especially Chinese and Indian trials are still found to be poorly reported and tended  
31  
32 503 to present more positive conclusions than those from western countries.<sup>169 170</sup> Moreover, 7 of the  
33  
34 504 included meta-analyses showed no more than poor methodological quality. All were published in  
35  
36 505 peer-reviewed journals in the past 5 years. One complementary journal is among them, while 6 of  
37  
38 506 the journals are conventional psychiatric journals with impact factors ranging from 2.419 to 4.369.  
39  
40  
41 507 Thus, particularly the review process as well as the editorial work need to be improved. Further  
42  
43 508 clinical practice guidelines should extend their search strategies and include standard search terms  
44  
45 509 for CAM. This is also important for CAM therapies that do not show consistent evidence or that are  
46  
47 510 not yet investigated. This information might be equally interesting for physicians as well as for  
48  
49 511 patients to make an informed decision about the treatment for clinical depression.  
50  
51  
52  
53  
54

## 512 **Conclusion**

513 This overview of systematic reviews on CAM treatments for clinical depression aimed to provide a  
54  
55 514 systematic search strategy and evidence base, on which further clinical practice guidelines may build  
56  
57 515 their recommendations. To improve quality of trials and meta-analyses, researchers, reviewers as  
58  
59  
60

1  
2 516 well as editors are asked to ensure that future articles strictly adhere the CONSORT and PRISMA  
3  
4 517 guidelines.  
5  
6  
7  
8  
9  
10  
11  
12  
13  
14  
15  
16  
17  
18  
19  
20  
21  
22  
23  
24  
25  
26  
27  
28  
29  
30  
31  
32  
33  
34  
35  
36  
37  
38  
39  
40  
41  
42  
43  
44  
45  
46  
47  
48  
49  
50  
51  
52  
53  
54  
55  
56  
57  
58  
59  
60

For peer review only



1  
2 518 **Acknowledgements**

3  
4 519 None.

5  
6  
7 520 **Funding**

8  
9 521 This research received no specific grant from any funding agency in the public, commercial or not-  
10  
11 522 for-profit sectors.

12  
13  
14 523 **Competing interests**

15  
16 524 The authors declare no competing interests. The authors have no financial or non-financial  
17  
18 525 association that might create a conflict of interest regarding the submitted manuscript.

19  
20  
21  
22 526 **Author contribution statement**

23  
24 527 HH was responsible for the conception and design of the study, the collection and analysis of the  
25  
26 528 study data and for drafting the manuscript. DA participated in the analysis of the study data and  
27  
28 529 drafting the manuscript. HC participated in the conception and design of the study and the analysis  
29  
30 530 of the study data, and critically revised the manuscript. GD participated in the conception and design  
31  
32 531 of the study, and critically revised the manuscript. All authors approved the final manuscript.

33  
34  
35  
36 532 **Data Availability**

37  
38  
39 533 All data analysed within this overview are included in this published article and its supplementary  
40  
41 534 information files.

535 **References**

- 536 1. Kessler RC, Berglund P, Demler O, et al. The epidemiology of major depressive disorder: results  
537 from the National Comorbidity Survey Replication (NCS-R). *Jama* 2003;289(23):3095-105.  
538 doi: 10.1001/jama.289.23.3095
- 539 2. Moussavi S, Chatterji S, Verdes E, et al. Depression, chronic diseases, and decrements in health:  
540 results from the World Health Surveys. *Lancet* 2007;370(9590):851-8. doi: 10.1016/S0140-  
541 6736(07)61415-9
- 542 3. Rubio JM, Markowitz JC, Alegria A, et al. Epidemiology of chronic and nonchronic major depressive  
543 disorder: results from the national epidemiologic survey on alcohol and related conditions.  
544 *Depress Anxiety* 2011;28(8):622-31. doi: 10.1002/da.20864
- 545 4. American Psychiatric Association. Diagnostic and statistical manual of mental disorders, fifth  
546 edition (DSM-5). Arlington: American Psychiatric Publishing 2013.
- 547 5. Lai HM, Cleary M, Sitharthan T, et al. Prevalence of comorbid substance use, anxiety and mood  
548 disorders in epidemiological surveys, 1990-2014: A systematic review and meta-analysis.  
549 *Drug Alcohol Depend* 2015;154:1-13. doi: 10.1016/j.drugalcdep.2015.05.031
- 550 6. Herbert J, Lucassen PJ. Depression as a risk factor for Alzheimer's disease: Genes, steroids,  
551 cytokines and neurogenesis - What do we need to know? *Front Neuroendocrinol*  
552 2016;41:153-71. doi: 10.1016/j.yfrne.2015.12.001
- 553 7. Riccelli R, Passamonti L, Cerasa A, et al. Individual differences in depression are associated with  
554 abnormal function of the limbic system in multiple sclerosis patients. *Mult Scler*  
555 2016;22(8):1094-105. doi: 10.1177/1352458515606987
- 556 8. Azar M, Pruessner M, Baer LH, et al. A study on negative and depressive symptom prevalence in  
557 individuals at ultra-high risk for psychosis. *Early Interv Psychiatry* 2016 doi:  
558 10.1111/eip.12386
- 559 9. Chechko N, Kellermann T, Augustin M, et al. Disorder-specific characteristics of borderline  
560 personality disorder with co-occurring depression and its comparison with major depression:  
561 An fMRI study with emotional interference task. *Neuroimage Clin* 2016;12:517-25. doi:  
562 10.1016/j.nicl.2016.08.015
- 563 10. Chen MH, Pan TL, Hsu JW, et al. Attention-deficit hyperactivity disorder comorbidity and  
564 antidepressant resistance among patients with major depression: A nationwide longitudinal  
565 study. *Eur Neuropsychopharmacol* 2016;26(11):1760-67. doi:  
566 10.1016/j.euroneuro.2016.09.369
- 567 11. Ronconi JM, Shiner B, Watts BV. A Meta-Analysis of Depressive Symptom Outcomes in  
568 Randomized, Controlled Trials for PTSD. *J Nerv Ment Dis* 2015;203(7):522-9. doi:  
569 10.1097/NMD.0000000000000322
- 570 12. Global Burden of Disease Study Collaborators. Global, regional, and national incidence,  
571 prevalence, and years lived with disability for 301 acute and chronic diseases and injuries in  
572 188 countries, 1990-2013: a systematic analysis for the Global Burden of Disease Study 2013.  
573 *Lancet* 2015;386(9995):743-800. doi: 10.1016/S0140-6736(15)60692-4
- 574 13. Cuijpers P, van Straten A, Andersson G, et al. Psychotherapy for depression in adults: a meta-  
575 analysis of comparative outcome studies. *J Consult Clin Psychol* 2008;76(6):909-22. doi:  
576 10.1037/a0013075
- 577 14. Gartlehner G, Wagner G, Matyas N, et al. Pharmacological and non-pharmacological treatments  
578 for major depressive disorder: review of systematic reviews. *BMJ Open* 2017;7(6):e014912.  
579 doi: 10.1136/bmjopen-2016-014912
- 580 15. Cipriani A, Furukawa TA, Salanti G, et al. Comparative efficacy and acceptability of 21  
581 antidepressant drugs for the acute treatment of adults with major depressive disorder: a  
582 systematic review and network meta-analysis. *The Lancet* 2018;391(10128):1357-66. doi:  
583 10.1016/S0140-6736(17)32802-7
- 584 16. Mathew SJ, Charney DS. Publication bias and the efficacy of antidepressants. *Am J Psychiatry*  
585 2009;166(2):140-5. doi: 10.1176/appi.ajp.2008.08071102
- 586 17. Pigott HE, Leventhal AM, Alter GS, et al. Efficacy and effectiveness of antidepressants: current  
587 status of research. *Psychother Psychosom* 2010;79(5):267-79. doi: 10.1159/000318293

- 1  
2 588 18. Rief W, Nestoriuc Y, Weiss S, et al. Meta-analysis of the placebo response in antidepressant trials.  
3 589 *J Affect Disord* 2009;118(1-3):1-8. doi: 10.1016/j.jad.2009.01.029
- 4 590 19. Turner EH, Matthews AM, Linardatos E, et al. Selective publication of antidepressant trials and its  
5 591 influence on apparent efficacy. *N Engl J Med* 2008;358(3):252-60. doi:  
6 592 10.1056/NEJMs065779
- 7 593 20. Forneris CA, Nussbaumer B, Kaminski-Hartenthaler A, et al. Psychological therapies for preventing  
8 594 seasonal affective disorder. *Cochrane Database Syst Rev* 2015(11):CD011270. doi:  
9 595 10.1002/14651858.CD011270.pub2
- 10 596 21. Gartlehner G, Nussbaumer B, Gaynes BN, et al. Second-generation antidepressants for preventing  
11 597 seasonal affective disorder in adults. *Cochrane Database Syst Rev* 2015(11):CD011268. doi:  
12 598 10.1002/14651858.CD011268.pub2
- 13 599 22. Kirsch I, Deacon BJ, Huedo-Medina TB, et al. Initial severity and antidepressant benefits: a meta-  
14 600 analysis of data submitted to the Food and Drug Administration. *PLoS Med* 2008;5(2):e45.  
15 601 doi: 10.1371/journal.pmed.0050045
- 16 602 23. Costanian C, Christensen RAG, Edgell H, et al. Factors associated with complementary and  
17 603 alternative medicine use among women at midlife. *Climacteric* 2017;20(5):421-26. doi:  
18 604 10.1080/13697137.2017.1346072
- 19 605 24. Henson JB, Brown CL, Chow S-C, et al. Complementary and Alternative Medicine Use in United  
20 606 States Adults With Liver Disease. *J Clin Gastroenterol* 2017;51(6):564-70. doi:  
21 607 10.1097/mcg.0000000000000617
- 22 608 25. Rhee TG, Westberg SM, Harris IM. Complementary and Alternative Medicine in U.S. Adults with  
23 609 Diabetes: Reasons for Use and Perceived Benefits. *J Diabetes* 2017 doi: 10.1111/1753-  
24 610 0407.12607
- 25 611 26. Zhang Y, Dennis JA, Leach MJ, et al. Complementary and Alternative Medicine Use Among US  
26 612 Adults With Headache or Migraine: Results from the 2012 National Health Interview Survey.  
27 613 *Headache* 2017;57(8):1228-42. doi: 10.1111/head.13148
- 28 614 27. Bahall M. Prevalence, patterns, and perceived value of complementary and alternative medicine  
29 615 among cancer patients: a cross-sectional, descriptive study. *BMC Complement Altern Med*  
30 616 2017;17(1):345. doi: 10.1186/s12906-017-1853-6
- 31 617 28. Luberto CM, White C, Sears RW, et al. Integrative medicine for treating depression: an update on  
32 618 the latest evidence. *Curr Psychiatry Rep* 2013;15(9):391. doi: 10.1007/s11920-013-0391-2
- 33 619 29. Ravindran AV, da Silva TL. Complementary and alternative therapies as add-on to  
34 620 pharmacotherapy for mood and anxiety disorders: a systematic review. *J Affect Disord*  
35 621 2013;150(3):707-19. doi: 10.1016/j.jad.2013.05.042
- 36 622 30. Qaseem A, Barry MJ, Kansagara D. Nonpharmacologic Versus Pharmacologic Treatment of Adult  
37 623 Patients With Major Depressive Disorder: A Clinical Practice Guideline From the American  
38 624 College of Physicians. *Ann Intern Med* 2016;164(5):350-9. doi: 10.7326/m15-2570
- 39 625 31. APA. Practice guideline for the treatment of patients with major depressive disorder.  
40 626 Washington, DC: American Psychiatric Association 2010.
- 41 627 32. Ravindran AV, Balneaves LG, Faulkner G, et al. Canadian Network for Mood and Anxiety  
42 628 Treatments (CANMAT) 2016 Clinical Guidelines for the Management of Adults with Major  
43 629 Depressive Disorder: Section 5. Complementary and Alternative Medicine Treatments. *Can J*  
44 630 *Psychiatry* 2016;61(9):576-87. doi: 10.1177/0706743716660290
- 45 631 33. DGPPN, BÄK, KBV, et al. Clinical practice guideline for unipolar depression [S3-Leitlinie/Nationale  
46 632 VersorgungsLeitlinie Unipolare Depression – Langfassung, 2. Auflage. Version 5] 2015  
47 633 [Available from: [http://www.awmf.org/uploads/tx\\_szleitlinien/nvl-](http://www.awmf.org/uploads/tx_szleitlinien/nvl-005l_S3_Unipolare_Depression_2017-05.pdf)  
48 634 [005l\\_S3\\_Unipolare\\_Depression\\_2017-05.pdf](http://www.awmf.org/uploads/tx_szleitlinien/nvl-005l_S3_Unipolare_Depression_2017-05.pdf).]
- 49 635 34. National Collaborating Centre for Mental Health. Depression: The Treatment and Management of  
50 636 Depression in Adults (Updated Edition). Leicester and London UK: The British Psychological  
51 637 Society & The Royal College of Psychiatrists 2010.
- 52 638 35. Bauer M, Pfennig A, Severus E, et al. World Federation of Societies of Biological Psychiatry  
53 639 (WFSBP) guidelines for biological treatment of unipolar depressive disorders, part 1: update  
54 640 2013 on the acute and continuation treatment of unipolar depressive disorders. *World J Biol*  
55 641 *Psychiatry* 2013;14(5):334-85. doi: 10.3109/15622975.2013.804195

- 1  
2 642 36. Moher D, Liberati A, Tetzlaff J, et al. Preferred reporting items for systematic reviews and meta-  
3 643 analyses: the PRISMA statement. *BMJ* 2009;339:b2535. doi: 10.1136/bmj.b2535
- 4 644 37. Panic N, Leoncini E, de Belvis G, et al. Evaluation of the endorsement of the preferred reporting  
5 645 items for systematic reviews and meta-analysis (PRISMA) statement on the quality of  
6 646 published systematic review and meta-analyses. *PLoS One* 2013;8(12):e83138. doi:  
7 647 10.1371/journal.pone.0083138
- 8 648 38. Higgins JPT, Green S. Cochrane Handbook for systematic reviews of interventions Version 5.1.0:  
9 649 The Cochrane Collaboration; . 2011. <http://handbook.cochrane.org>.
- 10 650 39. National Center for Complementary and Integrative Health. Complementary, Alternative, or  
11 651 Integrative Health: What's In a Name? 2016 [Available from:  
12 652 <https://nccih.nih.gov/health/integrative-health> accessed 24.07.2017.
- 13 653 40. Keller MB. Remission versus response: the new gold standard of antidepressant care. *J Clin*  
14 654 *Psychiatry* 2004;65 Suppl 4:53-9.
- 15 655 41. Wieland LS, Manheimer E, Berman BM. Development and classification of an operational  
16 656 definition of complementary and alternative medicine for the Cochrane collaboration. *Altern*  
17 657 *Ther Health Med* 2011;17(2):50-9.
- 18 658 42. Freeman MP, Mischoulon D, Tedeschini E, et al. Complementary and alternative medicine for  
19 659 major depressive disorder: a meta-analysis of patient characteristics, placebo-response rates,  
20 660 and treatment outcomes relative to standard antidepressants. *J Clin Psychiatry*  
21 661 2010;71(6):682-8. doi: 10.4088/JCP.10r05976blu
- 22 662 43. Muin M, Fontelo P, Ackerman M. PubMed Informer: monitoring MEDLINE/PubMed through e-  
23 663 mail alerts, SMS, PDA downloads and RSS feeds. *AMIA Annu Symp Proc* 2005:1057.
- 24 664 44. Shea BJ, Grimshaw JM, Wells GA, et al. Development of AMSTAR: a measurement tool to assess  
25 665 the methodological quality of systematic reviews. *BMC Med Res Methodol* 2007;7:10. doi:  
26 666 10.1186/1471-2288-7-10
- 27 667 45. Shea BJ, Hamel C, Wells GA, et al. AMSTAR is a reliable and valid measurement tool to assess the  
28 668 methodological quality of systematic reviews. *J Clin Epidemiol* 2009;62(10):1013-20. doi:  
29 669 10.1016/j.jclinepi.2008.10.009
- 30 670 46. Cohen J. Statistical power analysis for the behavioral sciences. Hillsdale: Lawrence Erlbaum  
31 671 Associates 1988.
- 32 672 47. National Institute for Clinical Excellence. Depression: management of depression in primary and  
33 673 secondary care. Clinical practice guideline No 23. London: National Institute for Clinical  
34 674 Excellence 2004. 670 p.:670.
- 35 675 48. Brozek JL, Akl EA, Alonso-Coello P, et al. Grading quality of evidence and strength of  
36 676 recommendations in clinical practice guidelines. Part 1 of 3. An overview of the GRADE  
37 677 approach and grading quality of evidence about interventions. *Allergy* 2009;64(5):669-77.  
38 678 doi: 10.1111/j.1398-9995.2009.01973.x [published Online First: 2009/02/13]
- 39 679 49. Stub T, Alræk T, Liu J. Acupuncture treatment for depression—A systematic review and meta-  
40 680 analysis. *European Journal of Integrative Medicine* 2011;3(4):e259-e70. doi:  
41 681 <https://doi.org/10.1016/j.eujim.2011.09.003>
- 42 682 50. Smith CA, Armour M, Lee MS, et al. Acupuncture for depression. *Cochrane Database Syst Rev*  
43 683 2018;3:CD004046. doi: 10.1002/14651858.CD004046.pub4
- 44 684 51. Al-Karawi D, Al Mamoori DA, Tayyar Y. The Role of Curcumin Administration in Patients with  
45 685 Major Depressive Disorder: Mini Meta-Analysis of Clinical Trials. *Phytother Res*  
46 686 2016;30(2):175-83. doi: 10.1002/ptr.5524
- 47 687 52. Appleton KM, Rogers PJ, Ness AR. Updated systematic review and meta-analysis of the effects of  
48 688 n-3 long-chain polyunsaturated fatty acids on depressed mood. *Am J Clin Nutr*  
49 689 2010;91(3):757-70. doi: 10.3945/ajcn.2009.28313
- 50 690 53. Appleton KM, Sallis HM, Perry R, et al. omega-3 Fatty acids for major depressive disorder in  
51 691 adults: an abridged Cochrane review. *BMJ Open* 2016;6(3):e010172. doi: 10.1136/bmjopen-  
52 692 2015-010172
- 53 693 54. Asher GN, Gartlehner G, Gaynes BN, et al. Comparative Benefits and Harms of Complementary  
54 694 and Alternative Medicine Therapies for Initial Treatment of Major Depressive Disorder:  
55 695 Systematic Review and Meta-Analysis. *J Altern Complement Med* 2017 doi:  
56 696 10.1089/acm.2016.0261

- 1  
2 697 55. Bloch MH, Hannestad J. Omega-3 fatty acids for the treatment of depression: systematic review  
3 698 and meta-analysis. *Mol Psychiatry* 2012;17(12):1272-82. doi: 10.1038/mp.2011.100  
4 699 56. Cabral P, Meyer HB, Ames D. Effectiveness of yoga therapy as a complementary treatment for  
5 700 major psychiatric disorders: a meta-analysis. *Prim Care Companion CNS Disord*  
6 701 2011;13(4):PCC.10r01068. doi: 10.4088/PCC.10r01068  
7 702 57. Chi I, Jordan-Marsh M, Guo M, et al. Tai chi and reduction of depressive symptoms for older  
8 703 adults: a meta-analysis of randomized trials. *Geriatr Gerontol Int* 2013;13(1):3-12. doi:  
9 704 10.1111/j.1447-0594.2012.00882.x  
10 705 58. Clarke K, Mayo-Wilson E, Kenny J, et al. Can non-pharmacological interventions prevent relapse in  
11 706 adults who have recovered from depression? A systematic review and meta-analysis of  
12 707 randomised controlled trials. *Clin Psychol Rev* 2015;39:58-70. doi: 10.1016/j.cpr.2015.04.002  
13 708 59. Cui YH, Zheng Y. A meta-analysis on the efficacy and safety of St John's wort extract in depression  
14 709 therapy in comparison with selective serotonin reuptake inhibitors in adults. *Neuropsychiatr*  
15 710 *Dis Treat* 2016;12:1715-23. doi: 10.2147/ndt.s106752  
16 711 60. Galante J, Iribarren SJ, Pearce PF. Effects of mindfulness-based cognitive therapy on mental  
17 712 disorders: a systematic review and meta-analysis of randomised controlled trials. *J Res Nurs*  
18 713 2013;18(2):133-55. doi: 10.1177/1744987112466087  
19 714 61. Golden RN, Gaynes BN, Ekstrom RD, et al. The efficacy of light therapy in the treatment of mood  
20 715 disorders: a review and meta-analysis of the evidence. *Am J Psychiatry* 2005;162(4):656-62.  
21 716 doi: 10.1176/appi.ajp.162.4.656  
22 717 62. Gowda U, Mutowo MP, Smith BJ, et al. Vitamin D supplementation to reduce depression in  
23 718 adults: meta-analysis of randomized controlled trials. *Nutrition* 2015;31(3):421-9. doi:  
24 719 10.1016/j.nut.2014.06.017  
25 720 63. Goyal M, Singh S, Sibinga EM, et al. Meditation programs for psychological stress and well-being:  
26 721 a systematic review and meta-analysis. *JAMA Intern Med* 2014;174(3):357-68. doi:  
27 722 10.1001/jamainternmed.2013.13018  
28 723 64. Hofmann SG, Sawyer AT, Witt AA, et al. The effect of mindfulness-based therapy on anxiety and  
29 724 depression: A meta-analytic review. *J Consult Clin Psychol* 2010;78(2):169-83. doi:  
30 725 10.1037/a0018555  
31 726 65. Jorm AF, Christensen H, Griffiths KM, et al. Effectiveness of complementary and self-help  
32 727 treatments for depression. *Med J Aust* 2002;176 Suppl:S84-96.  
33 728 66. Kim HL, Streltzer J, Goebert D. St. John's wort for depression: a meta-analysis of well-defined  
34 729 clinical trials. *J Nerv Ment Dis* 1999;187(9):532-8.  
35 730 67. Klainin-Yobas P, Oo WN, Suzanne Yew PY, et al. Effects of relaxation interventions on depression  
36 731 and anxiety among older adults: a systematic review. *Aging Ment Health* 2015;19(12):1043-  
37 732 55. doi: 10.1080/13607863.2014.997191  
38 733 68. Kou MJ, Chen JX. Integrated traditional and Western medicine for treatment of depression based  
39 734 on syndrome differentiation: a meta-analysis of randomized controlled trials based on the  
40 735 Hamilton depression scale. *J Tradit Chin Med* 2012;32(1):1-5.  
41 736 69. Kraguljac NV, Montori VM, Pavuluri M, et al. Efficacy of omega-3 fatty acids in mood disorders - a  
42 737 systematic review and metaanalysis. *Psychopharmacol Bull* 2009;42(3):39-54.  
43 738 70. Lai J, Moxey A, Nowak G, et al. The efficacy of zinc supplementation in depression: systematic  
44 739 review of randomised controlled trials. *J Affect Disord* 2012;136(1-2):e31-e39. doi:  
45 740 10.1016/j.jad.2011.06.022  
46 741 71. Li G, Mbuagbaw L, Samaan Z, et al. Efficacy of vitamin D supplementation in depression in adults:  
47 742 a systematic review. *J Clin Endocrinol Metab* 2014;99(3):757-67. doi: 10.1210/jc.2013-3450  
48 743 72. Lin PY, Su KP. A meta-analytic review of double-blind, placebo-controlled trials of antidepressant  
49 744 efficacy of omega-3 fatty acids. *J Clin Psychiatry* 2007;68(7):1056-61.  
50 745 73. Linde K, Berner M, Egger M, et al. St John's wort for depression: meta-analysis of randomised  
51 746 controlled trials. *Br J Psychiatry* 2005;186:99-107. doi: 10.1192/bjp.186.2.99  
52 747 74. Linde K, Mulrow CD, Berner M, et al. St John's wort for depression. *Cochrane Database Syst Rev*  
53 748 2005(2):CD000448. doi: 10.1002/14651858.CD000448.pub2  
54 749 75. Man C, Li C, Gong D, et al. Meta-analysis of Chinese herbal Xiaoyao formula as an adjuvant  
55 750 treatment in relieving depression in Chinese patients. *Complement Ther Med*  
56 751 2014;22(2):362-70. doi: 10.1016/j.ctim.2014.02.001

- 1  
2 752 76. Martins JG. EPA but not DHA appears to be responsible for the efficacy of omega-3 long chain  
3 753 polyunsaturated fatty acid supplementation in depression: evidence from a meta-analysis of  
4 754 randomized controlled trials. *J Am Coll Nutr* 2009;28(5):525-42.
- 5 755 77. Mocking RJ, Harmsen I, Assies J, et al. Meta-analysis and meta-regression of omega-3  
6 756 polyunsaturated fatty acid supplementation for major depressive disorder. *Transl Psychiatry*  
7 757 2016;6:e756. doi: 10.1038/tp.2016.29
- 8 758 78. Moyer CA, Rounds J, Hannum JW. A meta-analysis of massage therapy research. *Psychol Bull*  
9 759 2004;130(1):3-18. doi: 10.1037/0033-2909.130.1.3
- 10 760 79. Nussbaumer B, Kaminski-Hartenthaler A, Forneris Catherine A, et al. Light therapy for preventing  
11 761 seasonal affective disorder. *Cochrane Database Syst Rev* 2015(11):CD011269. doi:  
12 762 10.1002/14651858.CD011269.pub2
- 13 763 80. Piet J, Hougaard E. The effect of mindfulness-based cognitive therapy for prevention of relapse in  
14 764 recurrent major depressive disorder: a systematic review and meta-analysis. *Clin Psychol Rev*  
15 765 2011;31(6):1032-40. doi: 10.1016/j.cpr.2011.05.002
- 16 766 81. Qin F, Wu XA, Tang Y, et al. Meta-analysis of randomized controlled trials to assess the  
17 767 effectiveness and safety of Free and Easy Wanderer Plus, a polyherbal preparation for  
18 768 depressive disorders. *J Psychiatr Res* 2011;45(11):1518-24. doi:  
19 769 10.1016/j.jpsychires.2011.06.018
- 20 770 82. Rahimi R, Nikfar S, Abdollahi M. Efficacy and tolerability of *Hypericum perforatum* in major  
21 771 depressive disorder in comparison with selective serotonin reuptake inhibitors: a meta-  
22 772 analysis. *Prog Neuropsychopharmacol Biol Psychiatry* 2009;33(1):118-27. doi:  
23 773 10.1016/j.pnpbp.2008.10.018
- 24 774 83. Ren Y, Zhu C, Wu J, et al. Comparison between herbal medicine and fluoxetine for depression: a  
25 775 systematic review of randomized controlled trials. *Complement Ther Med* 2015;23(5):674-84.  
26 776 doi: 10.1016/j.ctim.2015.07.002
- 27 777 84. Roder C, Schaefer M, Leucht S. [Meta-analysis of effectiveness and tolerability of treatment of  
28 778 mild to moderate depression with *St. John's Wort*]. *Fortschr Neurol Psychiatr* 2004;72(6):330-  
29 779 43. doi: 10.1055/s-2003-812513
- 30 780 85. Sarris J, Murphy J, Mischoulon D, et al. Adjunctive Nutraceuticals for Depression: A Systematic  
31 781 Review and Meta-Analyses. *Am J Psychiatry* 2016;173(6):575-87. doi:  
32 782 10.1176/appi.ajp.2016.15091228
- 33 783 86. Sarris J, Panossian A, Schweitzer I, et al. Herbal medicine for depression, anxiety and insomnia: a  
34 784 review of psychopharmacology and clinical evidence. *Eur Neuropsychopharmacol*  
35 785 2011;21(12):841-60. doi: 10.1016/j.euroneuro.2011.04.002
- 36 786 87. Smith CA, Hay PP. Acupuncture for depression. *Cochrane Database Syst Rev* 2005(2):CD004046.  
37 787 doi: 10.1002/14651858.CD004046.pub2
- 38 788 88. Sublette ME, Ellis SP, Geant AL, et al. Meta-analysis of the effects of eicosapentaenoic acid (EPA)  
39 789 in clinical trials in depression. *J Clin Psychiatry* 2011;72(12):1577-84. doi:  
40 790 10.4088/JCP.10m06634
- 41 791 89. Taylor MJ, Carney SM, Goodwin GM, et al. Folate for depressive disorders: systematic review and  
42 792 meta-analysis of randomized controlled trials. *J Psychopharmacol* 2004;18(2):251-6. doi:  
43 793 10.1177/0269881104042630
- 44 794 90. Wang C, Bannuru R, Ramel J, et al. Tai Chi on psychological well-being: systematic review and  
45 795 meta-analysis. *BMC Complement Altern Med* 2010;10:23. doi: 10.1186/1472-6882-10-23
- 46 796 91. Wang F, Lee EK, Wu T, et al. The effects of tai chi on depression, anxiety, and psychological well-  
47 797 being: a systematic review and meta-analysis. *Int J Behav Med* 2014;21(4):605-17. doi:  
48 798 10.1007/s12529-013-9351-9
- 49 799 92. Wang H, Qi H, Wang BS, et al. Is acupuncture beneficial in depression: a meta-analysis of 8  
50 800 randomized controlled trials? *J Affect Disord* 2008;111(2-3):125-34. doi:  
51 801 10.1016/j.jad.2008.04.020
- 52 802 93. Wang Y, Fan R, Huang X. Meta-analysis of the clinical effectiveness of traditional Chinese  
53 803 medicine formula Chaihu-Shugan-San in depression. *J Ethnopharmacol* 2012;141(2):571-7.  
54 804 doi: 10.1016/j.jep.2011.08.079

- 1  
2 805 94. Wang YY, Li XH, Zheng W, et al. Mindfulness-based interventions for major depressive disorder: A  
3 806 comprehensive meta-analysis of randomized controlled trials. *J Affect Disord* 2018;229:429-  
4 807 36. doi: 10.1016/j.jad.2017.12.093
- 5 808 95. Whiskey E, Werneke U, Taylor D. A systematic review and meta-analysis of Hypericum  
6 809 perforatum in depression: a comprehensive clinical review. *Int Clin Psychopharmacol*  
7 810 2001;16(5):239-52.
- 8 811 96. Yeung WF, Chung KF, Ng KY, et al. A meta-analysis of the efficacy and safety of traditional Chinese  
9 812 medicine formula Ganmai Dazao decoction for depression. *J Ethnopharmacol*  
10 813 2014;153(2):309-17. doi: 10.1016/j.jep.2014.02.046
- 11 814 97. Yin J, Dishman RK. The effect of Tai Chi and Qigong practice on depression and anxiety symptoms:  
12 815 A systematic review and meta-regression analysis of randomized controlled trials. *Ment*  
13 816 *Health Phys Act* 2014;7(3):135-46.
- 14 817 98. Zhang X, Kang D, Zhang L, et al. Shuganjieyu capsule for major depressive disorder (MDD) in  
15 818 adults: a systematic review. *Aging Ment Health* 2014;18(8):941-53. doi:  
16 819 10.1080/13607863.2014.899975
- 17 820 99. Zheng W, Zhang YF, Zhong HQ, et al. Wuling Capsule for Major Depressive Disorder: A Meta-  
18 821 analysis of Randomised Controlled Trials. *East Asian Arch Psychiatry* 2016;26(3):87-97.
- 19 822 100. Ng QX, Venkatanarayanan N, Ho CYX. Clinical use of Hypericum perforatum (St John's wort) in  
20 823 depression: A meta-analysis. *J Affect Disord* 2017;210:211-21.
- 21 824 101. Chan YY, Lo WY, Yang SN, et al. The benefit of combined acupuncture and antidepressant  
22 825 medication for depression: A systematic review and meta-analysis. *J Affect Disord*  
23 826 2015;176:106-17. doi: 10.1016/j.jad.2015.01.048 [published Online First: 2015/02/24]
- 24 827 102. Smith CA, Hay PP, Macpherson H. Acupuncture for depression. *Cochrane Database Syst Rev*  
25 828 2010(1):CD004046. doi: 10.1002/14651858.CD004046.pub3
- 26 829 103. Zhang Y, Qu SS, Zhang JP, et al. Rapid Onset of the Effects of Combined Selective Serotonin  
27 830 Reuptake Inhibitors and Electroacupuncture on Primary Depression: A Meta-Analysis. *J Altern*  
28 831 *Complement Med* 2016;22(1):1-8. doi: 10.1089/acm.2015.0114
- 29 832 104. Zhang ZJ, Chen HY, Yip KC, et al. The effectiveness and safety of acupuncture therapy in  
30 833 depressive disorders: systematic review and meta-analysis. *J Affect Disord* 2010;124(1-2):9-  
31 834 21. doi: 10.1016/j.jad.2009.07.005
- 32 835 105. Coelho HF, Boddy K, Ernst E. Massage therapy for the treatment of depression: a systematic  
33 836 review. *Int J Clin Pract* 2008;62(2):325-33. doi: 10.1111/j.1742-1241.2007.01553.x
- 34 837 106. Cramer H, Anheyer D, Lauche R, et al. A systematic review of yoga for major depressive disorder.  
35 838 *J Affect Disord* 2017;213:70-77. doi: 10.1016/j.jad.2017.02.006
- 36 839 107. Derom ML, Sayon-Orea C, Martinez-Ortega JM, et al. Magnesium and depression: a systematic  
37 840 review. *Nutr Neurosci* 2013;16(5):191-206. doi: 10.1179/1476830512y.0000000044
- 38 841 108. Dolle K, Schulte-Korne G. [Complementary treatment methods for depression in children and  
39 842 adolescents]. *Prax Kinderpsychol Kinderpsychiatr* 2014;63(3):237-63.
- 40 843 109. Dwyer AV, Whitten DL, Hawrelak JA. Herbal medicines, other than St. John's Wort, in the  
41 844 treatment of depression: a systematic review. *Altern Med Rev* 2011;16(1):40-9.
- 42 845 110. Fond G, Macgregor A, Leboyer M, et al. Fasting in mood disorders: neurobiology and  
43 846 effectiveness. A review of the literature. *Psychiatry Res* 2013;209(3):253-8. doi:  
44 847 10.1016/j.psychres.2012.12.018
- 45 848 111. Hausenblas HA, Heekin K, Mutchie HL, et al. A systematic review of randomized controlled trials  
46 849 examining the effectiveness of saffron (*Crocus sativus* L.) on psychological and behavioral  
47 850 outcomes. *J Integr Med* 2015;13(4):231-40. doi: 10.1016/s2095-4964(15)60176-5
- 48 851 112. Jorm AF, Allen NB, O'Donnell CP, et al. Effectiveness of complementary and self-help treatments  
49 852 for depression in children and adolescents. *Med J Aust* 2006;185(7):368-72.
- 50 853 113. Maratos AS, Gold C, Wang X, et al. Music therapy for depression. *Cochrane Database Syst Rev*  
51 854 2008(1):CD004517. doi: 10.1002/14651858.CD004517.pub2
- 52 855 114. Opie RS, O'Neil A, Itsiopoulos C, et al. The impact of whole-of-diet interventions on depression  
53 856 and anxiety: a systematic review of randomised controlled trials. *Public Health Nutr*  
54 857 2015;18(11):2074-93. doi: 10.1017/s1368980014002614
- 55 858 115. Pilkington K, Kirkwood G, Rampes H, et al. Homeopathy for depression: a systematic review of  
56 859 the research evidence. *Homeopathy* 2005;94(3):153-63.

- 1  
2 860 116. Sanchez-Vidana DI, Ngai SP, He W, et al. The Effectiveness of Aromatherapy for Depressive  
3 861 Symptoms: A Systematic Review. *Evid Based Complement Alternat Med* 2017;2017:5869315.  
4 862 doi: 10.1155/2017/5869315
- 5 863 117. Schoenberg PL, David AS. Biofeedback for psychiatric disorders: a systematic review. *Appl*  
6 864 *Psychophysiol Biofeedback* 2014;39(2):109-35. doi: 10.1007/s10484-014-9246-9
- 7 865 118. Tsang HW, Chan EP, Cheung WM. Effects of mindful and non-mindful exercises on people with  
8 866 depression: a systematic review. *Br J Clin Psychol* 2008;47(Pt 3):303-22. doi:  
9 867 10.1348/014466508x279260
- 10 868 119. Williams AL, Cotter A, Sabina A, et al. The role for vitamin B-6 as treatment for depression: a  
11 869 systematic review. *Fam Pract* 2005;22(5):532-7. doi: 10.1093/fampra/cmi040
- 12 870 120. Al-Karawi D, Jubair L. Bright light therapy for nonseasonal depression: Meta-analysis of clinical  
13 871 trials. *J Affect Disord* 2016;198:64-71. doi: 10.1016/j.jad.2016.03.016
- 14 872 121. Grosso G, Pajak A, Marventano S, et al. Role of omega-3 fatty acids in the treatment of  
15 873 depressive disorders: a comprehensive meta-analysis of randomized clinical trials. *PLoS One*  
16 874 2014;9(5):e96905. doi: 10.1371/journal.pone.0096905
- 17 875 122. Hallahan B, Ryan T, Hibbeln JR, et al. Efficacy of omega-3 highly unsaturated fatty acids in the  
18 876 treatment of depression. *Br J Psychiatry* 2016;209(3):192-201. doi:  
19 877 10.1192/bjp.bp.114.160242
- 20 878 123. Ng QX, Peters C, Ho CYX, et al. A meta-analysis of the use of probiotics to alleviate depressive  
21 879 symptoms. *J Affect Disord* 2017;228:13-19. doi: 10.1016/j.jad.2017.11.063
- 22 880 124. Penders TM, Stanciu CN, Schoemann AM, et al. Bright Light Therapy as Augmentation of  
23 881 Pharmacotherapy for Treatment of Depression: A Systematic Review and Meta-Analysis.  
24 882 *Prim Care Companion CNS Disord* 2016;18(5) doi: 10.4088/PCC.15r01906
- 25 883 125. Perera S, Eisen R, Bhatt M, et al. Light therapy for non-seasonal depression: systematic review  
26 884 and meta-analysis. *BJPsych Open* 2016;2(2):116-26. doi: 10.1192/bjpo.bp.115.001610
- 27 885 126. Shih M, Yang YH, Koo M. A meta-analysis of hypnosis in the treatment of depressive symptoms:  
28 886 a brief communication. *Int J Clin Exp Hypn* 2009;57(4):431-42. doi:  
29 887 10.1080/00207140903099039
- 30 888 127. Spedding S. Vitamin D and depression: a systematic review and meta-analysis comparing studies  
31 889 with and without biological flaws. *Nutrients* 2014;6(4):1501-18. doi: 10.3390/nu6041501
- 32 890 128. Davidson JR, Crawford C, Ives JA, et al. Homeopathic treatments in psychiatry: A systematic  
33 891 review of randomized placebo-controlled studies. *J Clin Psychiatry* 2011;72(6):795-805.
- 34 892 129. Ernst E. Bach flower remedies: a systematic review of randomised clinical trials. *Swiss Med Wkly*  
35 893 2010;140:w13079. doi: 10.4414/smw.2010.13079
- 36 894 130. Galante J, Galante I, Bekkers MJ, et al. Effect of kindness-based meditation on health and well-  
37 895 being: a systematic review and meta-analysis. *J Consult Clin Psychol* 2014;82(6):1101-14. doi:  
38 896 10.1037/a0037249
- 39 897 131. Goncalves JP, Lucchetti G, Menezes PR, et al. Religious and spiritual interventions in mental  
40 898 health care: a systematic review and meta-analysis of randomized controlled clinical trials.  
41 899 *Psychol Med* 2015;45(14):2937-49. doi: 10.1017/s0033291715001166
- 42 900 132. Hou WH, Chiang PT, Hsu TY, et al. Treatment effects of massage therapy in depressed people: a  
43 901 meta-analysis. *J Clin Psychiatry* 2010;71(7):894-901. doi: 10.4088/JCP.09r05009blu
- 44 902 133. Joyce J, Herbison GP. Reiki for depression and anxiety. *Cochrane Database Syst Rev*  
45 903 2015(4):CD006833. doi: 10.1002/14651858.CD006833.pub2
- 46 904 134. Blanck P, Perleth S, Heidenreich T, et al. Effects of mindfulness exercises as stand-alone  
47 905 intervention on symptoms of anxiety and depression: Systematic review and meta-analysis.  
48 906 *Behav Res Ther* 2017;102:25-35. doi: 10.1016/j.brat.2017.12.002
- 49 907 135. Jun JH, Choi TY, Lee JA, et al. Herbal medicine (Gan Mai Da Zao decoction) for depression: a  
50 908 systematic review and meta-analysis of randomized controlled trials. *Maturitas*  
51 909 2014;79(4):370-80. doi: 10.1016/j.maturitas.2014.08.008
- 52 910 136. Lee TM, Chan CC. Dose-response relationship of phototherapy for seasonal affective disorder: a  
53 911 meta-analysis. *Acta Psychiatr Scand* 1999;99(5):315-23.
- 54 912 137. Nelms JA, Castel L. A Systematic Review and Meta-Analysis of Randomized and Nonrandomized  
55 913 Trials of Clinical Emotional Freedom Techniques (EFT) for the Treatment of Depression.  
56 914 *Explore (NY)* 2016;12(6):416-26. doi: 10.1016/j.explore.2016.08.001



- 1  
2 915 138. Aalbers S, Fusar-Poli L, Freeman RE, et al. Music therapy for depression. *Cochrane Database of*  
3 916 *Systematic Reviews* 2017(11):CD004517. doi: 10.1002/14651858.CD004517.pub3  
4 917 139. Almeida OP, Ford AH, Flicker L. Systematic review and meta-analysis of randomized placebo-  
5 918 controlled trials of folate and vitamin B12 for depression. *Int Psychogeriatr* 2015;27(5):727-  
6 919 37. doi: 10.1017/s1041610215000046  
7 920 140. Anderson N, Heywood-Everett S, Siddiqi N, et al. Faith-adapted psychological therapies for  
8 921 depression and anxiety: Systematic review and meta-analysis. *J Affect Disord* 2015;176:183-  
9 922 96. doi: 10.1016/j.jad.2015.01.019  
10 923 141. Apaydin EA, Maher AR, Shanman R, et al. A systematic review of St. John's wort for major  
11 924 depressive disorder. *Syst Rev* 2016;5(1):148. doi: 10.1186/s13643-016-0325-2  
12 925 142. Appleton KM, Sallis HM, Perry R, et al. Omega-3 fatty acids for depression in adults. *Cochrane*  
13 926 *Database Syst Rev* 2015(11):CD004692. doi: 10.1002/14651858.CD004692.pub4  
14 927 143. Bo A, Mao W, Lindsey MA. Effects of mind-body interventions on depressive symptoms among  
15 928 older chinese adults: A systematic review and meta-analysis. *Int J Geriatr Psychiatry*  
16 929 2017;32(5):509-21. doi: 10.1002/gps.4688  
17 930 144. Cramer H, Lauche R, Langhorst J, et al. Yoga for depression: a systematic review and meta-  
18 931 analysis. *Depress Anxiety* 2013;30(11):1068-83. doi: 10.1002/da.22166  
19 932 145. Galizia I, Oldani L, Macritchie K, et al. S-adenosyl methionine (SAMe) for depression in adults.  
20 933 *Cochrane Database Syst Rev* 2016(10):CD011286. doi: 10.1002/14651858.CD011286.pub2  
21 934 146. Hausenblas HA, Saha D, Dubyak PJ, et al. Saffron (*Crocus sativus* L.) and major depressive  
22 935 disorder: a meta-analysis of randomized clinical trials. *J Integr Med* 2013;11(6):377-83. doi:  
23 936 10.3736/jintegrmed2013056  
24 937 147. Huang R, Wang K, Hu J. Effect of Probiotics on Depression: A Systematic Review and Meta-  
25 938 Analysis of Randomized Controlled Trials. *Nutrients* 2016;8(8) doi: 10.3390/nu8080483  
26 939 148. Kuyken W, Warren FC, Taylor RS, et al. Efficacy of Mindfulness-Based Cognitive Therapy in  
27 940 Prevention of Depressive Relapse: An Individual Patient Data Meta-analysis From  
28 941 Randomized Trials. *JAMA Psychiatry* 2016;73(6):565-74. doi:  
29 942 10.1001/jamapsychiatry.2016.0076  
30 943 149. Linde K, Berner MM, Kriston L. St John's wort for major depression. *Cochrane Database Syst Rev*  
31 944 2008;8(4):CD000448.  
32 945 150. Liu X, Clark J, Siskind D, et al. A systematic review and meta-analysis of the effects of Qigong and  
33 946 Tai Chi for depressive symptoms. *Complement Ther Med* 2015;23(4):516-34. doi:  
34 947 10.1016/j.ctim.2015.05.001  
35 948 151. Martensson B, Pettersson A, Berglund L, et al. Bright white light therapy in depression: A critical  
36 949 review of the evidence. *J Affect Disord* 2015;182:1-7. doi: 10.1016/j.jad.2015.04.013  
37 950 152. Meekums B, Karkou V, Nelson EA. Dance movement therapy for depression. *Cochrane Database*  
38 951 *Syst Rev* 2015(2):CD009895. doi: 10.1002/14651858.CD009895.pub2  
39 952 153. Mukai T, Kishi T, Matsuda Y, et al. A meta-analysis of inositol for depression and anxiety  
40 953 disorders. *Hum Psychopharmacol* 2014;29(1):55-63. doi: 10.1002/hup.2369  
41 954 154. Ng QX, Koh SSH, Chan HW, et al. Clinical Use of Curcumin in Depression: A Meta-Analysis. *J Am*  
42 955 *Med Dir Assoc* 2017;18(6):503-08. doi: 10.1016/j.jamda.2016.12.071  
43 956 155. Scheffl C, Kilarski LL, Bschor T, et al. Efficacy of adding nutritional supplements in unipolar  
44 957 depression: A systematic review and meta-analysis. *Eur Neuropsychopharmacol*  
45 958 2017;27(11):1090-109. doi: 10.1016/j.euroneuro.2017.07.004  
46 959 156. Shaffer JA, Edmondson D, Wasson LT, et al. Vitamin D supplementation for depressive  
47 960 symptoms: a systematic review and meta-analysis of randomized controlled trials.  
48 961 *Psychosom Med* 2014;76(3):190-6. doi: 10.1097/psy.0000000000000044  
49 962 157. Shaw KA, Turner J, Del Mar C. Tryptophan and 5-Hydroxytryptophan for depression. *Cochrane*  
50 963 *Database of Systematic Reviews* 2002(1):CD003198. doi: 10.1002/14651858.CD003198  
51 964 158. Strauss C, Cavanagh K, Oliver A, et al. Mindfulness-based interventions for people diagnosed  
52 965 with a current episode of an anxiety or depressive disorder: a meta-analysis of randomised  
53 966 controlled trials. *PLoS One* 2014;9(4):e96110. doi: 10.1371/journal.pone.0096110  
54 967 159. Taylor MJ, Carney S, Geddes J, et al. Folate for depressive disorders. *Cochrane Database Syst Rev*  
55 968 2003(2):CD003390. doi: 10.1002/14651858.cd003390

- 1  
2 969 160. Tuunainen A, Kripke DF, Endo T. Light therapy for non-seasonal depression. *Cochrane Database*  
3 970 *Syst Rev* 2004(2):CD004050. doi: 10.1002/14651858.CD004050.pub2  
4 971 161. Yeung WF, Chung KF, Ng KY, et al. A systematic review on the efficacy, safety and types of  
5 972 Chinese herbal medicine for depression. *J Psychiatr Res* 2014;57:165-75. doi:  
6 973 10.1016/j.jpsychires.2014.05.016  
7 974 162. Zhao K, Bai Z, Bo A, et al. A systematic review and meta-analysis of music therapy for the older  
8 975 adults with depression. *Int J Geriatr Psychiatry* 2016;31(11):1188-98.  
9 976 163. von Hippel PT. The heterogeneity statistic  $I^2$  can be biased in small meta-analyses. *BMC Med Res*  
10 977 *Methodol* 2015;15(1):35. doi: 10.1186/s12874-015-0024-z  
11 978 164. Parikh SV, Quilty LC, Ravitz P, et al. Canadian Network for Mood and Anxiety Treatments  
12 979 (CANMAT) 2016 Clinical Guidelines for the Management of Adults with Major Depressive  
13 980 Disorder: Section 2. Psychological Treatments. *Can J Psychiatry* 2016;61(9):524-39. doi:  
14 981 10.1177/0706743716659418  
15 982 165. Kennedy SH, Lam RW, McIntyre RS, et al. Canadian Network for Mood and Anxiety Treatments  
16 983 (CANMAT) 2016 Clinical Guidelines for the Management of Adults with Major Depressive  
17 984 Disorder: Section 3. Pharmacological Treatments. *Can J Psychiatry* 2016;61(9):540-60. doi:  
18 985 10.1177/0706743716659417  
19 986 166. Fava GA, Gatti A, Belaise C, et al. Withdrawal Symptoms after Selective Serotonin Reuptake  
20 987 Inhibitor Discontinuation: A Systematic Review. *Psychother Psychosom* 2015;84(2):72-81. doi:  
21 988 10.1159/000370338  
22 989 167. Mills E, Montori VM, Wu P, et al. Interaction of St John's wort with conventional drugs:  
23 990 systematic review of clinical trials. *BMJ* 2004;329(7456):27-30. doi: 10.1136/bmj.329.7456.27  
24 991 168. Schulz KF, Altman DG, Moher D, et al. CONSORT 2010 statement: updated guidelines for  
25 992 reporting parallel group randomised trials. *BMJ* 2010;340:c332. doi: 10.1136/bmj.c332  
26 993 169. Cramer H, Lauche R, Langhorst J, et al. Are Indian yoga trials more likely to be positive than  
27 994 those from other countries? A systematic review of randomized controlled trials. *Contemp*  
28 995 *Clin Trials* 2015;41:269-72. doi: 10.1016/j.cct.2015.02.005  
29 996 170. Ma B, Chen ZM, Xu JK, et al. Do the CONSORT and STRICTA Checklists Improve the Reporting  
30 997 Quality of Acupuncture and Moxibustion Randomized Controlled Trials Published in Chinese  
31 998 Journals? A Systematic Review and Analysis of Trends. *PLoS One* 2016;11(1):e0147244. doi:  
32 999 10.1371/journal.pone.0147244  
33  
34  
35  
36  
37  
38  
39  
40  
41  
42  
43  
44  
45  
46  
47  
48  
49  
50  
51  
52  
53  
54  
55  
56  
57  
58  
59  
60

1  
2 **Figure legends**  
3

4  
5 **Figure 1. Study flow diagram.**  
6

7  
8 **Figure 2. Quality of evidence for depression severity.** ADM: Antidepressant medication, CBT:  
9  
10 Cognitive Behavioural Therapy, CI: Confidence Interval, I<sup>2</sup>: Heterogeneity, MBCT: Mindfulness-based  
11  
12 Cognitive Therapy, MBSR: Mindfulness-based Stress Reduction, N.c.: Not calculable because of only  
13  
14 one included RCT, N.r.: Not reported, S-adenosyl methionine, Tau: Treatment as Usual  
15  
16

17  
18 **Figure 3. Quality of evidence for depression response rates.** ADM: Antidepressant medication, CI:  
19  
20 Confidence Interval, I<sup>2</sup>: Heterogeneity, N.c.: Not calculable because of only one included RCT, OR:  
21  
22 Odds Ratio, RR: Risk Ratio  
23  
24

25  
26 **Figure 4. Quality of evidence for depression remission rates.** ADM: Antidepressant medication, CI:  
27  
28 Confidence Interval, I<sup>2</sup>: Heterogeneity, N.c.: Not calculable because of only one included RCT, OR:  
29  
30 Odds Ratio, RR: Risk Ratio, Tau: Treatment as Usual  
31  
32

33  
34 **Figure 5. Quality of evidence for depression relapse rates.** ADM: Antidepressant medication, CI:  
35  
36 Confidence Interval, HR: Hazard Ratio, I<sup>2</sup>: Heterogeneity, MBCT: Mindfulness-based Cognitive  
37  
38 Therapy, N.c.: Not calculable because of only one included RCT, OR: Odds Ratio, RR: Risk Ratio, Tau:  
39  
40 Treatment as Usual  
41  
42  
43  
44  
45  
46  
47  
48  
49  
50  
51  
52  
53  
54  
55  
56  
57  
58  
59  
60

## Tables

**Table 1. Electronic search strategy for PubMed.**

|    |                                                                                                                                                                                                                                                                                                                                                                                                                                                                                                                                                                                                                                                                                                                                                                                                                                                                                                                                                                                                                                                                                                                                                                                                                                                                                                                                                                                                                               |
|----|-------------------------------------------------------------------------------------------------------------------------------------------------------------------------------------------------------------------------------------------------------------------------------------------------------------------------------------------------------------------------------------------------------------------------------------------------------------------------------------------------------------------------------------------------------------------------------------------------------------------------------------------------------------------------------------------------------------------------------------------------------------------------------------------------------------------------------------------------------------------------------------------------------------------------------------------------------------------------------------------------------------------------------------------------------------------------------------------------------------------------------------------------------------------------------------------------------------------------------------------------------------------------------------------------------------------------------------------------------------------------------------------------------------------------------|
| #1 | (Depression OR Depressive Disorder, Major OR Depressive Disorder, Treatment-Resistant OR Dysthymic Disorder OR Seasonal Affective Disorder)[mh]                                                                                                                                                                                                                                                                                                                                                                                                                                                                                                                                                                                                                                                                                                                                                                                                                                                                                                                                                                                                                                                                                                                                                                                                                                                                               |
| #2 | (depress* OR dysthym* or “seasonal affective” OR “affective disorder” OR “affective disorders” OR “mood disorder” OR “mood disorders”)[tiab]                                                                                                                                                                                                                                                                                                                                                                                                                                                                                                                                                                                                                                                                                                                                                                                                                                                                                                                                                                                                                                                                                                                                                                                                                                                                                  |
| #3 | (Systematic review OR Meta-analysis)[pt] OR (Systematic* OR Meta-analy*)[ tiab]                                                                                                                                                                                                                                                                                                                                                                                                                                                                                                                                                                                                                                                                                                                                                                                                                                                                                                                                                                                                                                                                                                                                                                                                                                                                                                                                               |
| #4 | (Acupressure OR Acupuncture OR acid OR Alexander Technique OR alternative OR Aromatherapy OR Aroma Therapy OR Art Therap* OR ayurved* OR Balneotherapy OR Balneo Therapy OR bee OR Biofeedback OR Bio Feedback OR bright light OR Chelation Therapy OR Chinese Traditional Medicine OR Chiropractic OR Chronotherapy OR Color Therapy OR complementary OR craniosacral OR cupping OR Curcumin OR Dance Therapy OR diet OR Distant Healing OR Electroacupuncture OR Feldenkrais OR folic acid OR Folate OR Healing Touch OR herbal OR Herbs OR Homeopath* OR Honey OR Hydrotherapy OR hyperbaric oxygenation OR Hypericum perforatum OR Hyperthermia OR Hypnosis OR Imagery OR Inositol OR Kampo OR Light Therapy OR Magnesium OR Massage OR MBSR OR MBCT OR Meditation OR Mindfulness OR Morita Therapy OR Moxibustion OR Mediterranean OR Music Therap* OR Naturopathy OR Neural Therapy OR Omega-3 OR Osteopath* OR Ozone Therapy OR Phototherapy OR Pollen OR Prayer OR prebiotic* OR probiotic* OR Propolis OR Qi Gong OR Reflexology OR Reiki OR Relaxation OR Rolfing OR Royal Jelly OR S-adenosyl-L-methionine OR Saffron OR Shamanism OR Snoezelen OR Speleotherapy OR Spinal Manipulation OR Spiritual OR St John's Wort OR Supplements OR Tai Chi OR TCM OR Therapeutic Touch OR Traditional Chinese Medicine OR Tryptophan OR Tui na OR Turmeric OR vegan OR vegetarian OR venom OR Vitamin OR Yoga OR zinc)[tiab] |
| #5 | (Acupressure OR Acupuncture OR Acupuncture Therapy OR Acids OR Aromatherapy OR Art Therapy OR Balneology OR Biofeedback, Psychology OR Chelation Therapy OR Chiropractic OR Chronotherapy OR Color Therapy OR Complementary Therapies OR Crocus OR Curcuma OR Dance Therapy OR Diet OR Electroacupuncture OR Fatty Acids, Omega-3 OR Folic Acid OR Homeopathy OR Honey OR Hydrotherapy OR Hypericum OR Hyperthermia, Induced OR Hypnosis OR Imagery OR Inositol OR Magnesium OR Manipulation, Spinal OR Massage OR Medicine, Ayurvedic OR Medicine, Chinese Traditional OR Medicine, Kampo OR Meditation OR Mind-Body Therapies OR Mindfulness OR Moxibustion OR Naturopathy OR Ozone OR Phototherapy OR Plants, Medicinal OR Pollen OR Prebiotics OR Probiotics OR Propolis OR Qigong OR Relaxation OR Shamanism OR Speleotherapy OR Spiritual Therapies OR Supplements, Dietary OR Tai Ji OR Therapeutic Touch OR Tryptophan OR Venoms OR Vitamins OR Yoga OR Zinc)[mh]                                                                                                                                                                                                                                                                                                                                                                                                                                                     |
| #6 | (#1 OR #2) AND #3 AND (#4 OR #5)                                                                                                                                                                                                                                                                                                                                                                                                                                                                                                                                                                                                                                                                                                                                                                                                                                                                                                                                                                                                                                                                                                                                                                                                                                                                                                                                                                                              |

1  
2  
3  
4  
5  
6  
7  
8  
9  
10  
11  
12  
13  
14  
15  
16  
17  
18  
19  
20  
21  
22  
23  
24  
25  
26  
27  
28  
29  
30  
31  
32  
33  
34  
35  
36  
37  
38  
39  
40  
41  
42  
43  
44  
45  
46  
47  
48  
49  
50  
51  
52  
53  
54  
55  
56  
57  
58  
59  
60

**Supplementary data**

**Supplementary table 1:** Detailed AMSTAR ratings.

**Supplementary table 2:** Characteristics and outcomes of the included meta-analyses.

For peer review only

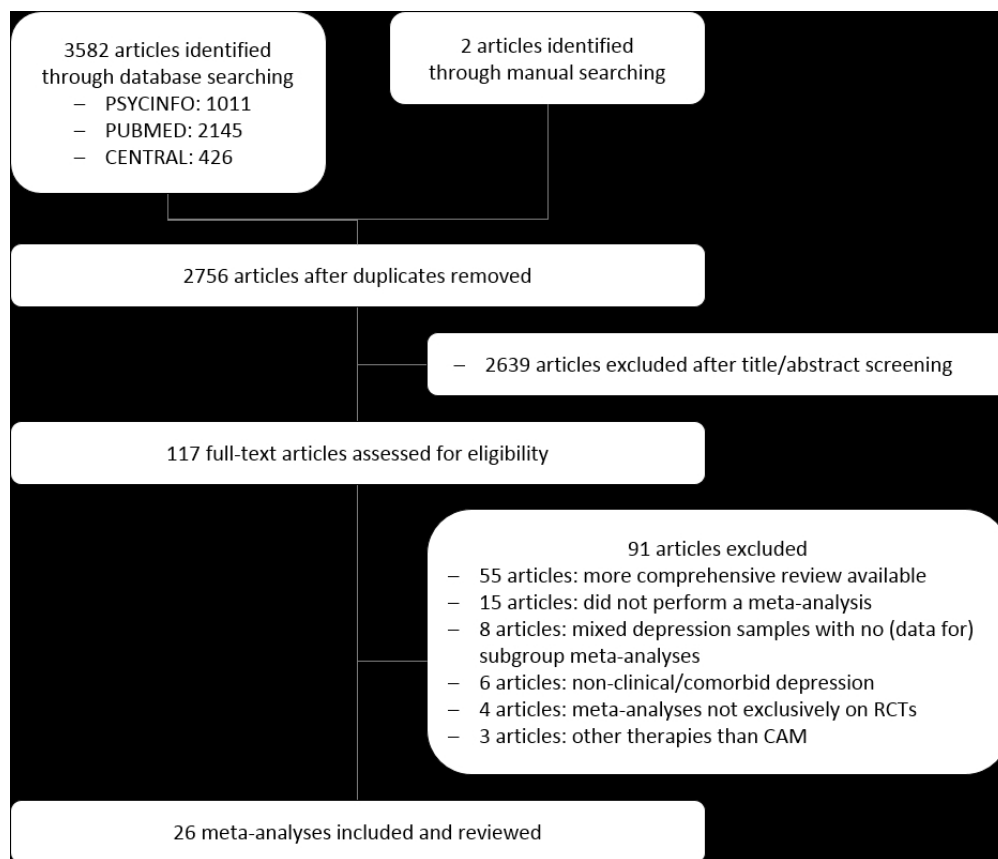

158x134mm (150 x 150 DPI)

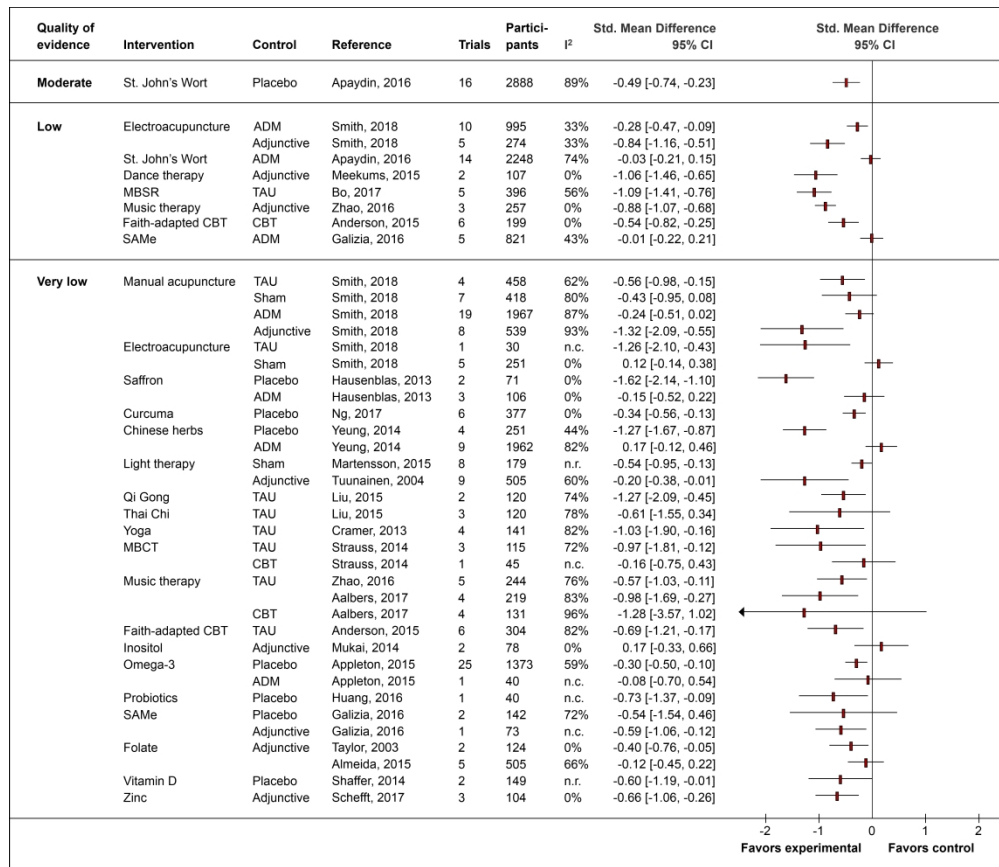

852x735mm (150 x 150 DPI)

1  
2  
3  
4  
5  
6  
7  
8  
9  
10  
11  
12  
13  
14  
15  
16  
17  
18  
19  
20  
21  
22  
23  
24  
25  
26  
27  
28  
29  
30  
31  
32  
33  
34  
35  
36  
37  
38  
39  
40  
41  
42  
43  
44  
45  
46  
47  
48  
49  
50  
51  
52  
53  
54  
55  
56  
57  
58  
59  
60

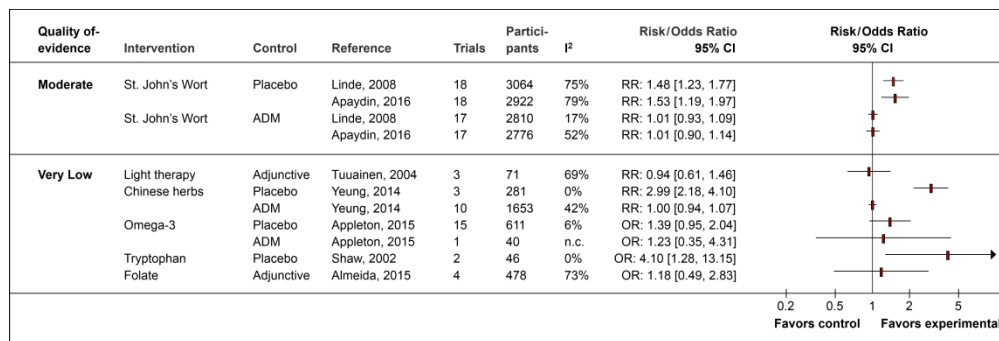

852x286mm (150 x 150 DPI)



1  
2  
3  
4  
5  
6  
7  
8  
9  
10  
11  
12  
13  
14  
15  
16  
17  
18  
19  
20  
21  
22  
23  
24  
25  
26  
27  
28  
29  
30  
31  
32  
33  
34  
35  
36  
37  
38  
39  
40  
41  
42  
43  
44  
45  
46  
47  
48  
49  
50  
51  
52  
53  
54  
55  
56  
57  
58  
59  
60

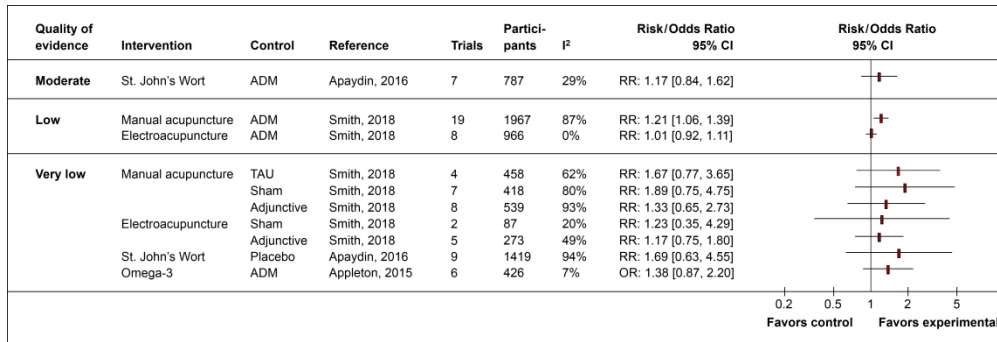

852x289mm (150 x 150 DPI)

1  
2  
3  
4  
5  
6  
7  
8  
9  
10  
11  
12  
13  
14  
15  
16  
17  
18  
19  
20  
21  
22  
23  
24  
25  
26  
27  
28  
29  
30  
31  
32  
33  
34  
35  
36  
37  
38  
39  
40  
41  
42  
43  
44  
45  
46  
47  
48  
49  
50  
51  
52  
53  
54  
55  
56  
57  
58  
59  
60

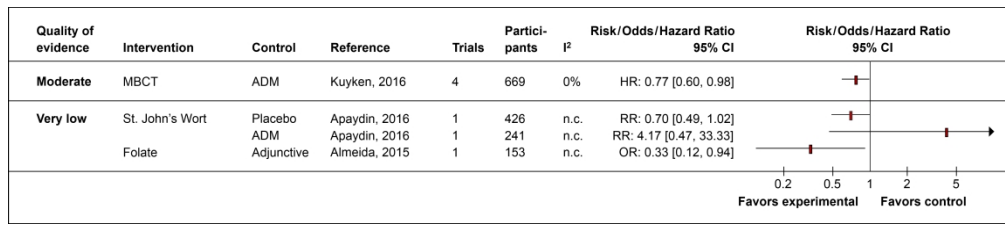

852x184mm (150 x 150 DPI)

Supplementary information to “Complementary therapies for clinical depression: an overview of systematic reviews”

by Heidemarie Haller, Dennis Anheyer, Holger Cramer, Gustav Dobos

Supplementary table 1: Characteristics and outcomes of the included meta-analyses.

|                           | Included meta-analysis   | Diagnosis | Number of studies | Studies with low risk of bias                        | Quality of the meta-analyses | Instruments used | Follow-up time | Pooled treatment effects (respective latest follow-up) with quality of evidence ratings according to GRADE                                                                                                                                                                                                                                                                                                                                                                                                                                                                                                                                                                                                                                                                                                                                                                                                                                                                  | Safety                                                                                                                                                                                                                                                                                                                                                                                                                             |
|---------------------------|--------------------------|-----------|-------------------|------------------------------------------------------|------------------------------|------------------|----------------|-----------------------------------------------------------------------------------------------------------------------------------------------------------------------------------------------------------------------------------------------------------------------------------------------------------------------------------------------------------------------------------------------------------------------------------------------------------------------------------------------------------------------------------------------------------------------------------------------------------------------------------------------------------------------------------------------------------------------------------------------------------------------------------------------------------------------------------------------------------------------------------------------------------------------------------------------------------------------------|------------------------------------------------------------------------------------------------------------------------------------------------------------------------------------------------------------------------------------------------------------------------------------------------------------------------------------------------------------------------------------------------------------------------------------|
| <b>Acupuncture</b>        |                          |           |                   |                                                      |                              |                  |                |                                                                                                                                                                                                                                                                                                                                                                                                                                                                                                                                                                                                                                                                                                                                                                                                                                                                                                                                                                             |                                                                                                                                                                                                                                                                                                                                                                                                                                    |
| <b>Manual acupuncture</b> | Smith 2018 <sup>50</sup> | MDD, CSD  | 49 RCTs           | SB: 9<br>PB: 9<br>DB: 5<br>AB: 24<br>RB: 2<br>OB: 15 | AMSTAR: 10                   | HAMD<br>BDI      | 1.5-12 weeks   | Severity:<br>– Sign. greater effects than TAU (4 RCTs; SMD=-0.56; 95%CI=[-0.98,-0.15]; I <sup>2</sup> =62%; p=.03; N=458; ⊕○○○ very low <sup>a,c,d,e</sup> )<br>– No sign. effects versus invasive SHAM (7 RCTs; SMD=-0.43; 95%CI=[-0.95,0.08]; I <sup>2</sup> =80%; p<.001; N=418; ⊕○○○ very low <sup>a,c,d,e</sup> )#<br>– Similar effects as SSRI/TCA (19 RCTs; SMD=-0.24; 95%CI=[-0.51,0.02]; I <sup>2</sup> =87%; p<.001; N=1967; ⊕○○○ very low <sup>a,c,e</sup> ) <sup>§</sup><br>– Sign. greater effects as adjunctive to SSRI versus SSRI (8 RCTs; SMD=-1.32; 95%CI=[-2.09,-0.55]; I <sup>2</sup> =93%; p<.001; N=539; ⊕○○○ very low <sup>a,c,e</sup> )<br>Remission:<br>– No sign. effects versus TAU (2 RCTs; RR=1.67; 95%CI=[0.77,3.65]; I <sup>2</sup> =0%; p=.44; N=94; ⊕○○○ very low <sup>a,d,e</sup> )<br>– No sign. effects versus invasive SHAM (5 RCTs; RR=1.89; 95%CI=[0.75,4.75]; I <sup>2</sup> =63%; p=.03; N=368; ⊕○○○ very low <sup>a,c,d,e</sup> ) | – Similar AEs as TAU (1 RCT; RR=0.89; 95%CI=[0.35,2.24]; I <sup>2</sup> =n.c.; N=320)<br>– Similar AEs as invasive SHAM (1 RCT; RR=2.5; 95%CI=[0.15,40.37]; I <sup>2</sup> =n.c.; N=17)<br>– Similar AEs adjunctive to SSRI versus SSRI (2 RCTs; SMD=-0.37; 95%CI=[-1.2,0.47]; I <sup>2</sup> =84%; N=150)<br>– Sign. less AEs than SSRI (3 RCTs; SMD=-1.75; 95%CI=[-3.17,-0.32]; I <sup>2</sup> =96%; p<.001; N=481) <sup>#</sup> |

1  
2  
3  
4  
5  
6  
7  
8  
9  
10  
11  
12  
13  
14  
15  
16  
17  
18  
19  
20  
21  
22  
23  
24  
25  
26  
27  
28  
29  
30  
31  
32  
33  
34  
35  
36  
37  
38  
39  
40  
41  
42  
43  
44  
45  
46

|                           |                          |          |         |                                                      |            |             |           |                                                                                                                                                                                                                                                                                                                                                                                                                                                                                                                                                                                                                                                        |                                                                                                                                                                                                                                  |  |
|---------------------------|--------------------------|----------|---------|------------------------------------------------------|------------|-------------|-----------|--------------------------------------------------------------------------------------------------------------------------------------------------------------------------------------------------------------------------------------------------------------------------------------------------------------------------------------------------------------------------------------------------------------------------------------------------------------------------------------------------------------------------------------------------------------------------------------------------------------------------------------------------------|----------------------------------------------------------------------------------------------------------------------------------------------------------------------------------------------------------------------------------|--|
|                           |                          |          |         |                                                      |            |             |           |                                                                                                                                                                                                                                                                                                                                                                                                                                                                                                                                                                                                                                                        | – Sign. smaller effects than SSRI/TCA (18 RCTs; RR=1.21; 95%CI=[1.06,1.39]; I <sup>2</sup> =18%; p=.24; N=1952; ⊕⊕○○ low <sup>a,e</sup> ) <sup>§</sup>                                                                           |  |
|                           |                          |          |         |                                                      |            |             |           |                                                                                                                                                                                                                                                                                                                                                                                                                                                                                                                                                                                                                                                        | – No sign. effects as adjunctive to SSRI versus SSRI (5 RCTs; RR=1.33; 95%CI=[0.65,2.73]; I <sup>2</sup> =76%; p=.002; N=299; ⊕○○○ very low <sup>a,c,e</sup> )                                                                   |  |
| <b>Electroacupuncture</b> | Smith 2018 <sup>50</sup> | MDD, CSD | 21 RCTs | SB: 6<br>PB: 3<br>DB: 5<br>AB: 16<br>RB: 1<br>OB: 12 | AMSTAR: 10 | HAMD<br>BDI | 2-6 weeks | Severity:<br>– Sign. greater effects than TAU (1 RCT; SMD=-1.26; 95%CI=[-2.10,-0.43]; I <sup>2</sup> =n.c.; N=30; ⊕○○○ very low <sup>a,c,d,e</sup> )<br>– No sign. effects versus invasive SHAM (5 RCTs; SMD=0.12; 95%CI=[-0.14,0.38]; I <sup>2</sup> =0%; p=.82; N=251; ⊕○○○ very low <sup>a,d,e</sup> ) <sup>#</sup><br>– Sign. greater effects than SSRI/TCA (10 RCTs; SMD=-0.28; 95%CI=[-0.47,-0.09]; I <sup>2</sup> =33%; p=.14; N=995; ⊕⊕○○ low <sup>a,e</sup> ) <sup>§</sup><br>– Sign. greater effects as adjunctive to SSRI versus SSRI (5 RCTs; SMD=-0.84; 95%CI=[-1.16,-0.51]; I <sup>2</sup> =33%; p=.20; N=274; ⊕⊕○○ low <sup>a,e</sup> ) | – Similar AEs as invasive SHAM (4 RCTs; RR=1.79; 95%CI=[0.99,3.25]; I <sup>2</sup> =16%; p=.31; N=244)<br>– Sign. less AEs as adjunctive to SSRI versus SSRI (1 RCT; SMD=-3.39; 95%CI=[-4.27,-2.50]; I <sup>2</sup> =n.c.; N=50) |  |
|                           |                          |          |         |                                                      |            |             |           | Remission:<br>– No sign. effects versus invasive SHAM (2 RCTs; RR=1.23; 95%CI=[0.35,4.29]; I <sup>2</sup> =20%; p=.26; N=87; ⊕○○○ very low <sup>a,d,e</sup> )<br>– Similar effects as SSRI/TCA (8 RCTs; RR=1.01; 95%CI=[0.92,1.11]; I <sup>2</sup> =0%; p=.43; N=966; ⊕⊕○○ low <sup>a,e</sup> ) <sup>§</sup><br>– No sign. effects as adjunctive to SSRI versus SSRI (5 RCTs; RR=1.17; 95%CI=[0.75,1.80]; I <sup>2</sup> =49%; p=.10; N=273; ⊕○○○ very low <sup>a,d,e</sup> )                                                                                                                                                                          |                                                                                                                                                                                                                                  |  |

**Herbs**

|    |                             |                           |                                                       |           |           |             |                                                                                                                                                  |                                                                                                                                              |                                                                                               |                                                                                            |
|----|-----------------------------|---------------------------|-------------------------------------------------------|-----------|-----------|-------------|--------------------------------------------------------------------------------------------------------------------------------------------------|----------------------------------------------------------------------------------------------------------------------------------------------|-----------------------------------------------------------------------------------------------|--------------------------------------------------------------------------------------------|
| 1  |                             |                           |                                                       |           |           |             |                                                                                                                                                  |                                                                                                                                              |                                                                                               |                                                                                            |
| 2  | <b>St. John's wort</b>      | Linde 2008 <sup>149</sup> | MDD 29 RCTs                                           | SB: 18    | AMSTAR: 8 | HAMD 4-12   | Response (50%):                                                                                                                                  | – Sign. greater effects than PLACEBO (18 RCTs; RR=1.48; 95%CI=[1.23,1.77]; I <sup>2</sup> =75%; p<.001; N=3064; ⊕⊕⊕○ moderate <sup>c</sup> ) | – Similar AEs as PLACEBO (14 RCTs; OR=0.98; 95%CI=[0.78,1.23]; I <sup>2</sup> =n.r.; N=2496), |                                                                                            |
| 3  |                             |                           |                                                       | PB: 29    |           | MADRS weeks |                                                                                                                                                  |                                                                                                                                              |                                                                                               | – Sign. less than ADMs (14 RCTs; OR=0.56; 95%CI=[0.43,0.74]; I <sup>2</sup> =n.r.; N=2663) |
| 4  |                             |                           |                                                       | DB: n.r.  |           |             |                                                                                                                                                  |                                                                                                                                              |                                                                                               |                                                                                            |
| 5  |                             |                           |                                                       | AB: 29    |           |             |                                                                                                                                                  |                                                                                                                                              |                                                                                               |                                                                                            |
| 6  |                             |                           |                                                       | RB: n.r.  |           |             |                                                                                                                                                  |                                                                                                                                              |                                                                                               |                                                                                            |
| 7  |                             |                           |                                                       | OB: n.r.  |           |             |                                                                                                                                                  |                                                                                                                                              |                                                                                               |                                                                                            |
| 8  |                             |                           |                                                       |           |           |             |                                                                                                                                                  |                                                                                                                                              |                                                                                               |                                                                                            |
| 9  |                             |                           |                                                       |           |           |             |                                                                                                                                                  |                                                                                                                                              |                                                                                               |                                                                                            |
| 10 |                             |                           |                                                       |           |           |             |                                                                                                                                                  |                                                                                                                                              |                                                                                               |                                                                                            |
| 11 |                             |                           |                                                       |           |           |             |                                                                                                                                                  |                                                                                                                                              |                                                                                               |                                                                                            |
| 12 |                             |                           |                                                       |           |           |             |                                                                                                                                                  |                                                                                                                                              |                                                                                               |                                                                                            |
| 13 | Apaydin 2016 <sup>141</sup> | MDD 35 RCTs               | SB: 9<br>PB: 27<br>DB: 5<br>AB: 26<br>RB: 3<br>OB: 33 | AMSTAR: 9 | HAMD 4-32 | Severity:   | – Sign. greater effects than PLACEBO (16 RCTs; SMD=-0.49; 95%CI=[-0.74,-0.23]; I <sup>2</sup> =89%; p=n.r.; N=2888; ⊕⊕⊕○ moderate <sup>c</sup> ) | – Similar AEs as PLACEBO (13 RCTs; OR=0.83; 95%CI=[0.62,1.13]; I <sup>2</sup> =n.r.; N=2600),                                                |                                                                                               |                                                                                            |
| 14 |                             |                           |                                                       |           |           |             |                                                                                                                                                  |                                                                                                                                              | weeks                                                                                         | – Sign. less than ADMs (11 RCTs; OR=0.67; 95%CI=[0.56,0.81]; I <sup>2</sup> =n.r.; N=1946) |
| 15 |                             |                           |                                                       |           |           |             |                                                                                                                                                  |                                                                                                                                              |                                                                                               |                                                                                            |
| 16 |                             |                           |                                                       |           |           |             |                                                                                                                                                  |                                                                                                                                              |                                                                                               |                                                                                            |
| 17 |                             |                           |                                                       |           |           |             |                                                                                                                                                  |                                                                                                                                              |                                                                                               |                                                                                            |
| 18 |                             |                           |                                                       |           |           |             |                                                                                                                                                  |                                                                                                                                              |                                                                                               |                                                                                            |
| 19 |                             |                           |                                                       |           |           |             |                                                                                                                                                  |                                                                                                                                              |                                                                                               |                                                                                            |
| 20 |                             |                           |                                                       |           |           |             |                                                                                                                                                  |                                                                                                                                              |                                                                                               |                                                                                            |
| 21 |                             |                           |                                                       |           |           |             |                                                                                                                                                  |                                                                                                                                              |                                                                                               |                                                                                            |
| 22 |                             |                           |                                                       |           |           |             |                                                                                                                                                  |                                                                                                                                              |                                                                                               |                                                                                            |
| 23 |                             |                           |                                                       |           |           |             |                                                                                                                                                  |                                                                                                                                              |                                                                                               |                                                                                            |
| 24 |                             |                           |                                                       |           |           |             |                                                                                                                                                  |                                                                                                                                              |                                                                                               |                                                                                            |
| 25 |                             |                           |                                                       |           |           |             |                                                                                                                                                  |                                                                                                                                              |                                                                                               |                                                                                            |
| 26 |                             |                           |                                                       |           |           |             |                                                                                                                                                  |                                                                                                                                              |                                                                                               |                                                                                            |
| 27 |                             |                           |                                                       |           |           |             |                                                                                                                                                  |                                                                                                                                              |                                                                                               |                                                                                            |
| 28 |                             |                           |                                                       |           |           |             |                                                                                                                                                  |                                                                                                                                              |                                                                                               |                                                                                            |
| 29 |                             |                           |                                                       |           |           |             |                                                                                                                                                  |                                                                                                                                              |                                                                                               |                                                                                            |
| 30 |                             |                           |                                                       |           |           |             |                                                                                                                                                  |                                                                                                                                              |                                                                                               |                                                                                            |
| 31 |                             |                           |                                                       |           |           |             |                                                                                                                                                  |                                                                                                                                              |                                                                                               |                                                                                            |
| 32 |                             |                           |                                                       |           |           |             |                                                                                                                                                  |                                                                                                                                              |                                                                                               |                                                                                            |
| 33 |                             |                           |                                                       |           |           |             |                                                                                                                                                  |                                                                                                                                              |                                                                                               |                                                                                            |
| 34 |                             |                           |                                                       |           |           |             |                                                                                                                                                  |                                                                                                                                              |                                                                                               |                                                                                            |
| 35 |                             |                           |                                                       |           |           |             |                                                                                                                                                  |                                                                                                                                              |                                                                                               |                                                                                            |
| 36 |                             |                           |                                                       |           |           |             |                                                                                                                                                  |                                                                                                                                              |                                                                                               |                                                                                            |
| 37 |                             |                           |                                                       |           |           |             |                                                                                                                                                  |                                                                                                                                              |                                                                                               |                                                                                            |
| 38 |                             |                           |                                                       |           |           |             |                                                                                                                                                  |                                                                                                                                              |                                                                                               |                                                                                            |
| 39 |                             |                           |                                                       |           |           |             |                                                                                                                                                  |                                                                                                                                              |                                                                                               |                                                                                            |
| 40 |                             |                           |                                                       |           |           |             |                                                                                                                                                  |                                                                                                                                              |                                                                                               |                                                                                            |
| 41 |                             |                           |                                                       |           |           |             |                                                                                                                                                  |                                                                                                                                              |                                                                                               |                                                                                            |
| 42 |                             |                           |                                                       |           |           |             |                                                                                                                                                  |                                                                                                                                              |                                                                                               |                                                                                            |
| 43 |                             |                           |                                                       |           |           |             |                                                                                                                                                  |                                                                                                                                              |                                                                                               |                                                                                            |
| 44 |                             |                           |                                                       |           |           |             |                                                                                                                                                  |                                                                                                                                              |                                                                                               |                                                                                            |
| 45 |                             |                           |                                                       |           |           |             |                                                                                                                                                  |                                                                                                                                              |                                                                                               |                                                                                            |
| 46 |                             |                           |                                                       |           |           |             |                                                                                                                                                  |                                                                                                                                              |                                                                                               |                                                                                            |

|                      |                                |          |         |                                                         |           |           |             |                                                                                                                                                                                                                                                                                                                                                                                                                                                                                           |                                                                                                                                                                                                               |
|----------------------|--------------------------------|----------|---------|---------------------------------------------------------|-----------|-----------|-------------|-------------------------------------------------------------------------------------------------------------------------------------------------------------------------------------------------------------------------------------------------------------------------------------------------------------------------------------------------------------------------------------------------------------------------------------------------------------------------------------------|---------------------------------------------------------------------------------------------------------------------------------------------------------------------------------------------------------------|
|                      |                                |          |         |                                                         |           |           |             | – No sign. effects versus PLACEBO (1 RCT; RR=0.70; 95%CI=[0.49,1.02]; I <sup>2</sup> =n.c.; N=426; ⊕○○○ very low <sup>a,c,d</sup> )                                                                                                                                                                                                                                                                                                                                                       |                                                                                                                                                                                                               |
|                      |                                |          |         |                                                         |           |           |             | – Similar effects as ADM (1 RCT; RR=4.17; 95%CI=[0.47,33.33]; I <sup>2</sup> =n.c.; N=241; ⊕○○○ very low <sup>a,c,d</sup> )                                                                                                                                                                                                                                                                                                                                                               |                                                                                                                                                                                                               |
| <b>Saffron</b>       | Hausenblas 2013 <sup>146</sup> | MDD      | 5 RCTs  | SB: 5<br>PB: 5<br>DB: 5<br>AB: 5<br>RB: n.r.<br>OB: n.r | AMSTAR: 7 | HAMD      | 6-8 weeks   | Severity:<br>– Sign. greater effects than PLACEBO (2 RCTs; SMD=-1.62; 95%CI=[-2.14,-1.10]; I <sup>2</sup> =0%; p=n.r.; N=71; ⊕○○○ very low <sup>c,d,e</sup> )<br>– Similar effects as SSRI/TCA (3 RCTs; SMD=-0.15; 95%CI=[-0.52,0.22]; I <sup>2</sup> =0%; p=n.r.; N=106; ⊕○○○ very low <sup>c,d,e</sup> )                                                                                                                                                                                | – No serious AEs                                                                                                                                                                                              |
| <b>Curcuma</b>       | Ng 2017 <sup>154</sup>         | MDD, CSD | 6 RCTs  | SB: 3<br>PB: 3<br>DB: 3<br>AB: 2<br>RB: 2<br>OB: 1      | AMSTAR: 6 | HAMD, BDI | 4-8 weeks   | Severity:<br>– Sign. greater effects than PLACEBO (6 RCTs; SMD=-0.34; 95%CI=[-0.56,-0.13]; I <sup>2</sup> =0%; p=.82; N=377; ⊕○○○ very low <sup>a,d,e</sup> )                                                                                                                                                                                                                                                                                                                             | – No serious AEs                                                                                                                                                                                              |
| <b>Chinese herbs</b> | Yeung 2014 <sup>161</sup>      | MND      | 21 RCTs | SB: 5<br>PB: 11<br>DB: 9<br>AB: 21<br>RB: 20<br>OB: 18  | AMSTAR: 4 | HAMD      | 6-8,5 weeks | Severity:<br>– Sign. greater effects than PLACEBO (4 RCTs; SMD=-1.27; 95%CI=[-1.67,-0.87]; I <sup>2</sup> =44%; p=.14; N=251; ⊕○○○ very low <sup>b,e</sup> )#<br>– Similar effects as SSRI/SNRI/TCA/TECA (9 RCTs; SMD=0.17; 95%CI=[-0.12,0.46]; I <sup>2</sup> =82%; p<.001; N=1962; ⊕○○○ very low <sup>b,c,e</sup> )#<br>Response (30%):<br>– Sign. greater effects than PLACEBO (3 RCTs; RR=2.99; 95%CI=[2.18,4.10]; I <sup>2</sup> =0%; p=.53; N=281; ⊕○○○ very low <sup>c,d,e</sup> ) | – Similar AEs as PLACEBO (3 RCTs; RR=1.29; 95%CI=[0.86,1.95]; I <sup>2</sup> =61%; p= n.r.; N=n.r.)<br>– Sign. less AEs than ADMs (29 RCTs; RR=0.23; 95%CI=[0.16,0.33]; I <sup>2</sup> =59%; p= n.r.; N=n.r.) |

– Similar effects as SSRI/SNRI/TCA/TECA (10 RCTs; RR=1.00; 95%CI=[0.94,1.07]; I<sup>2</sup>=42%; p=.08; N=1635; ⊕○○○ very low<sup>b,c,e</sup>)

### Light therapy

|                           |                                |     |        |                                                           |           |                |                 |                                                                                                                                                                                                                                                                                                                                                                         |                  |
|---------------------------|--------------------------------|-----|--------|-----------------------------------------------------------|-----------|----------------|-----------------|-------------------------------------------------------------------------------------------------------------------------------------------------------------------------------------------------------------------------------------------------------------------------------------------------------------------------------------------------------------------------|------------------|
| <b>Bright white light</b> | Tuunainen 2004 <sup>160</sup>  | MND | 18     | SB: 2<br>PB: 0<br>DB: 13<br>AB: 1<br>RB: n.r.<br>OB: n.r. | AMSTAR: 9 | HAMD, GDS      | 1 day - 8 weeks | Severity:<br>– Sign. greater effects than adjunctive to ADM than SHAM + ADM (18 RCTs; SMD=-0.20; 95%CI=[-0.38,-0.01]; I <sup>2</sup> =60%; p<.001; N=505; ⊕○○○ very low <sup>a,c,d</sup> )<br>Response:<br>– No effects than adjunctive to ADM than SHAM + ADM (3 RCTs; RR=0.94; 95%CI=[0.61,1.46]; I <sup>2</sup> =69%; p=.004; N=71; ⊕○○○ very low <sup>a,c,d</sup> ) | – No serious AEs |
|                           | Martensson 2015 <sup>151</sup> | SAD | 8 RCTs | N.r.                                                      | AMSTAR: 5 | HAMD, SIGH-SAD | 2-6 weeks       | Severity:<br>– Sign. greater effects than SHAM (8 RCTs; SMD=-0.54; 95%CI=[-0.95,-0.13]; I <sup>2</sup> =n.r.; N=179; ⊕○○○ very low <sup>b,c,d,e</sup> )                                                                                                                                                                                                                 | – N.r.           |

### Meditative movement therapies

|                            |                             |          |        |                                                    |           |                 |             |                                                                                                                                                                                                                                                    |                  |
|----------------------------|-----------------------------|----------|--------|----------------------------------------------------|-----------|-----------------|-------------|----------------------------------------------------------------------------------------------------------------------------------------------------------------------------------------------------------------------------------------------------|------------------|
| <b>Dance therapy</b>       | Meekums 2015 <sup>152</sup> | MND      | 2 RCTs | SB: 1<br>PB: 0<br>DB: 1<br>AB: 2<br>RB: 2<br>OB: 1 | AMSTAR: 9 | HAMD            | 4-12 weeks  | Severity:<br>– Sign. greater effects as adjunctive to ADM versus ADM (2 RCTs; SMD=-1.06; 95%CI=[-1.46,-0.65]; I <sup>2</sup> =0%; p=.70; N=107; ⊕⊕○○ low <sup>d,c</sup> )#                                                                         | – No serious AEs |
| <b>Qi Gong and Tai Chi</b> | Liu 2015 <sup>150</sup>     | MDD, CSD | 5 RCTs | N.r.                                               | AMSTAR: 4 | HAMD, GDS, CESD | 10-16 weeks | Severity:<br>– Sign. greater effects than TAU for Qi Gong (2 RCTs; SMD=-1.27; 95%CI=[-2.09,-0.45]; I <sup>2</sup> =74%; p=.05; N=120; ⊕○○○ very low <sup>b,c,d,e</sup> )* but no sign. effects for Tai Chi (3 RCTs; SMD=-0.61; 95%CI=[-1.55,0.34]; | – N.r.           |

|                                        |                             |          |        |                                                       |           |                     |            |                                                                                                                                                                                                                                                                                                                                  |                  |
|----------------------------------------|-----------------------------|----------|--------|-------------------------------------------------------|-----------|---------------------|------------|----------------------------------------------------------------------------------------------------------------------------------------------------------------------------------------------------------------------------------------------------------------------------------------------------------------------------------|------------------|
|                                        |                             |          |        |                                                       |           |                     |            | $I^2=78\%$ ; $p=.01$ ; $N=120$ ; ⊕○○○ very low <sup>b,c,d,e</sup> *)                                                                                                                                                                                                                                                             |                  |
| <b>Yoga</b>                            | Cramer 2013 <sup>144</sup>  | MDD, CSD | 5 RCTs | SB: 0<br>PB: 0<br>DB: 1<br>AB: 1<br>RB: 5<br>OB: 3    | AMSTAR: 8 | HAMD, ZGS, GDS, BDI | 4-8 weeks  | Severity:<br>– Sign. greater effects than TAU (4 RCTs; $SMD=-1.03$ ; $95\%CI=[-1.90,-0.16]$ ; $I^2=82\%$ ; $p<.001$ ; $N=141$ ; ⊕○○○ very low <sup>a,c,d,e</sup> )*<br>– Sign. greater effects than EXERCISE (2 RCTs; $SMD=-0.59$ ; $95\%CI=[-1.90,-0.16]$ ; $I^2=68\%$ ; $p=.08$ ; $N=108$ ; ⊕○○○ very low <sup>a,c,d,e</sup> ) | – N.r.           |
| <b>Mindfulness-based interventions</b> |                             |          |        |                                                       |           |                     |            |                                                                                                                                                                                                                                                                                                                                  |                  |
| <b>MBCT</b>                            | Strauss 2014 <sup>158</sup> | MDD      | 4 RCTs | N.r.                                                  | AMSTAR: 5 | HAMD, BDI           | 8-12 weeks | Severity:<br>– Sign. greater effects than TAU (3 RCTs; $SMD=-0.97$ ; $95\%CI=[-1.81,-0.12]$ ; $I^2=72\%$ ; $p=.03$ ; $N=115$ ; ⊕○○○ very low <sup>b,c,d</sup> ) <sup>§</sup><br>– Similar effects as CBT (1 RCT; $SMD=-0.16$ ; $95\%CI=[-0.75,0.43]$ ; $I^2=n.c.$ ; $N=45$ ; ⊕○○○ very low <sup>b,c,d</sup> ) <sup>§</sup>       | – N.r.           |
|                                        | Kuyken 2016 <sup>148</sup>  | MDD      | 4 RCTs | SB: 4<br>PB: 0<br>DB: 3<br>AB: 4<br>RB: 4<br>OB: 4    | AMSTAR: 6 | SCID, BDI           | 60 weeks   | Relapse:<br>– Sign. greater effects than ADM (4 RCTs; $HR=0.77$ ; $95\%CI=[0.60,0.98]$ ; $I^2=0\%$ ; $p=.92$ ; $N=669$ ; ⊕⊕⊕○ moderate <sup>d</sup> )                                                                                                                                                                            | – No serious AEs |
| <b>MBSR</b>                            | Bo 2017 <sup>143</sup>      | CSD      | 5 RCTs | SB: 0<br>PB: 0<br>DB: 1<br>AB: 5<br>RB: 5<br>OB: n.r. | AMSTAR: 6 | HAMD, GDS           | 8-12 weeks | Severity:<br>– Sign. greater effects than TAU/enhanced TAU (5 RCTs; $SMD=-1.09$ ; $95\%CI=[-1.41,-0.76]$ ; $I^2=56\%$ ; $p=.06$ ; $N=396$ ; ⊕⊕○○ low <sup>a,c</sup> )                                                                                                                                                            | – N.r.           |
| <b>Music therapy</b>                   |                             |          |        |                                                       |           |                     |            |                                                                                                                                                                                                                                                                                                                                  |                  |
|                                        |                             |          |        |                                                       |           |                     |            |                                                                                                                                                                                                                                                                                                                                  | –                |



|    |                                      |                     |      |        |       |         |       |                                                                          |                                                      |                         |
|----|--------------------------------------|---------------------|------|--------|-------|---------|-------|--------------------------------------------------------------------------|------------------------------------------------------|-------------------------|
| 1  |                                      |                     |      |        |       |         |       |                                                                          |                                                      |                         |
| 2  | <b>Music therapy</b>                 | Zhao                | MND  | 8 RCTs | SB: 0 | AMSTAR: | HAMD, | 4-52                                                                     | Severity:                                            | – N.r.                  |
| 3  |                                      | 2016 <sup>162</sup> |      |        | PB: 0 | 7       | GDS,  | weeks                                                                    | – Sign. greater effects than TAU (5 RCTs;            |                         |
| 4  |                                      |                     |      |        | DB: 0 |         | HADS  |                                                                          | SMD=-0.57; 95%CI=[-1.03,-0.11]; I <sup>2</sup> =76%; |                         |
| 5  |                                      |                     |      |        | AB: 8 |         |       |                                                                          | p<.001; N=244; ⊕○○○ very low <sup>a,c,d</sup> *      |                         |
| 6  |                                      |                     |      |        | RB: 7 |         |       |                                                                          | – Sign. greater effects as adjunctive to ADM         |                         |
| 7  |                                      |                     |      |        | OB: 8 |         |       |                                                                          | versus ADM (3 RCTs; SMD=-0.88; 95%CI=[-              |                         |
| 8  |                                      |                     |      |        |       |         |       |                                                                          | 1.07,-0.68]; I <sup>2</sup> =0%; p=.63; N=257; ⊕⊕○○  |                         |
| 9  |                                      |                     |      |        |       |         |       |                                                                          | low <sup>a,e</sup> *)                                |                         |
| 10 |                                      |                     |      |        |       |         |       |                                                                          |                                                      |                         |
| 11 |                                      |                     |      |        |       |         |       |                                                                          |                                                      |                         |
| 12 |                                      | Aalbers             | MDD, | 8 RCTs | SB: 2 | AMSTAR: | HAMD  | 12 weeks                                                                 | Severity:                                            | – Similar AEs as TAU (1 |
| 13 |                                      | 2017 <sup>138</sup> | CSD  |        | PB: 1 | 11      |       |                                                                          | – Sign. greater effects than TAU (4 RCTs;            | RCT; OR=0.45;           |
| 14 |                                      |                     |      |        | DB: 1 |         |       | SMD=-0.98; 95%CI=[-1.69,-0.27]; I <sup>2</sup> =83%;                     | 95%CI=[0.02,11.46];                                  |                         |
| 15 |                                      |                     |      |        | AB: 7 |         |       | p<.001; N=219; ⊕○○○ very low <sup>a,c,d</sup> )                          | I <sup>2</sup> =n.c.; N=79)                          |                         |
| 16 |                                      |                     |      |        | RB: 2 |         |       | – Similar effects as CBT (4 RCTs; SMD=-                                  |                                                      |                         |
| 17 |                                      |                     |      |        | OB: 3 |         |       | 1.28; 95%CI=[-3.57,1.02]; I <sup>2</sup> =96%;                           |                                                      |                         |
| 18 |                                      |                     |      |        |       |         |       | p<.001; N=131; ⊕○○○ very low <sup>a,c,d</sup> )                          |                                                      |                         |
| 19 |                                      |                     |      |        |       |         |       |                                                                          |                                                      |                         |
| 20 |                                      |                     |      |        |       |         |       |                                                                          |                                                      |                         |
| 21 | <b>Religious/spiritual therapies</b> |                     |      |        |       |         |       |                                                                          |                                                      |                         |
| 22 | <b>Faith-adapted CBT</b>             | Anderson            | MDD, | 9 RCTs | SB: 0 | AMSTAR: | N.r.  | N.r.                                                                     | Severity:                                            | – N.r.                  |
| 23 |                                      | 2015 <sup>140</sup> | CSD  |        | PB: 0 | 7       |       |                                                                          | – Sign. greater effects than TAU (6                  |                         |
| 24 |                                      |                     |      |        | DB: 4 |         |       |                                                                          | RCTs; SMD=-0.69; 95%CI=[-1.21,-                      |                         |
| 25 |                                      |                     |      |        | AB: 4 |         |       |                                                                          | 0.17]; I <sup>2</sup> =82%; p=.004; N=304;           |                         |
| 26 |                                      |                     |      |        | RB: 9 |         |       |                                                                          | ⊕○○○ very low <sup>a,c,d</sup> ) <sup>§</sup>        |                         |
| 27 |                                      |                     |      |        | OB: 0 |         |       |                                                                          | – Sign. greater effects than CBT (6 RCTs;            |                         |
| 28 |                                      |                     |      |        |       |         |       | SMD=-0.54; 95%CI=[-0.82,-0.25];                                          |                                                      |                         |
| 29 |                                      |                     |      |        |       |         |       | I <sup>2</sup> =0%; p=.78; N=199; ⊕⊕○○ low <sup>a,e</sup> ) <sup>§</sup> |                                                      |                         |
| 30 |                                      |                     |      |        |       |         |       |                                                                          |                                                      |                         |
| 31 |                                      |                     |      |        |       |         |       |                                                                          |                                                      |                         |
| 32 | <b>Supplements</b>                   |                     |      |        |       |         |       |                                                                          |                                                      |                         |
| 33 | <b>Inositol</b>                      | Mukai               | MDD  | 2 RCTs | N.r.  | AMSTAR: | HAMD  | 4 weeks                                                                  | Severity:                                            | – Similar AEs as        |
| 34 |                                      | 2014 <sup>153</sup> |      |        |       | 4       |       |                                                                          | – No sign. effects as adjunctive to SSRI versus      | adjunctive to ADM (1    |
| 35 |                                      |                     |      |        |       |         |       |                                                                          | PLACEBO + SSRI (2 RCTs; SMD=0.17;                    | RCT; RR=3.21;           |
| 36 |                                      |                     |      |        |       |         |       |                                                                          | 95%CI=[-0.33,0.66]; I <sup>2</sup> =0%; p=.93; N=78; | 95%CI=[0.14,72.55];     |
| 37 |                                      |                     |      |        |       |         |       | ⊕○○○ very low <sup>b,d,e</sup> )                                         | I <sup>2</sup> =n.c.; N=36)                          |                         |
| 38 |                                      |                     |      |        |       |         |       |                                                                          |                                                      |                         |
| 39 |                                      |                     |      |        |       |         |       |                                                                          |                                                      |                         |
| 40 |                                      |                     |      |        |       |         |       |                                                                          |                                                      |                         |
| 41 |                                      |                     |      |        |       |         |       |                                                                          |                                                      |                         |
| 42 |                                      |                     |      |        |       |         |       |                                                                          |                                                      |                         |
| 43 |                                      |                     |      |        |       |         |       |                                                                          |                                                      |                         |
| 44 |                                      |                     |      |        |       |         |       |                                                                          |                                                      |                         |
| 45 |                                      |                     |      |        |       |         |       |                                                                          |                                                      |                         |
| 46 |                                      |                     |      |        |       |         |       |                                                                          |                                                      |                         |

|    |                              |                              |     |         |                                                        |           |                                  |            |                                                                                                                                                                                                                                                                                                                                                                                                                                                                                                                                                                                                                                                                                                                                                                    |                                                                                                                                                   |
|----|------------------------------|------------------------------|-----|---------|--------------------------------------------------------|-----------|----------------------------------|------------|--------------------------------------------------------------------------------------------------------------------------------------------------------------------------------------------------------------------------------------------------------------------------------------------------------------------------------------------------------------------------------------------------------------------------------------------------------------------------------------------------------------------------------------------------------------------------------------------------------------------------------------------------------------------------------------------------------------------------------------------------------------------|---------------------------------------------------------------------------------------------------------------------------------------------------|
| 1  |                              |                              |     |         |                                                        |           |                                  |            |                                                                                                                                                                                                                                                                                                                                                                                                                                                                                                                                                                                                                                                                                                                                                                    |                                                                                                                                                   |
| 2  | <b>Omega-3 fatty acids</b>   | Appleton 2015 <sup>142</sup> | MDD | 26 RCTs | SB: 15<br>PB: 6<br>DB: 19<br>AB: 8<br>RB: 16<br>OB: 25 | AMSTAR: 9 | HAMD, MADRS, BDI, GDS, HSCL, IDS | 4-16 weeks | Severity:<br>– Sign. greater effects than PLACEBO (25 RCTs; SMD=-0.30; 95%CI=[-0.50,-0.10]; I <sup>2</sup> =59%; p<.001; N=1373; ⊕○○○ very low <sup>a,c,d,e</sup> )<br>– Similar effects as SSRI (1 RCT; SMD=-0.08; 95%CI=[-0.70,0.54]; I <sup>2</sup> =n.c.; N=40; ⊕○○○ very low <sup>a,c,d,e</sup> )<br>Response (50%):<br>– No sign. effects versus PLACEBO (15 RCTs; OR=1.39; 95%CI=[0.95,2.04]; I <sup>2</sup> =6%; p=.38; N=611; ⊕○○○ very low <sup>a,d,e</sup> )<br>– Similar effects as SSRI (1 RCT; OR=1.23; 95%CI=[0.35,4.31]; I <sup>2</sup> =n.c.; N=40; ⊕○○○ very low <sup>a,c,d,e</sup> )<br>Remission:<br>– No sign. effects versus PLACEBO (6 RCTs; OR=1.38; 95%CI=[0.87,2.20]; I <sup>2</sup> =7%; p=.37; N=426; ⊕○○○ very low <sup>a,d,e</sup> ) | – Similar AEs as PLACEBO (19 RCT; OR=1.24; 95%CI=[0.95,1.62]; I <sup>2</sup> =0%; p=.66; N=1207)                                                  |
| 24 | <b>Probiotics</b>            | Huang 2016 <sup>147</sup>    | MDD | 1 RCTs  | SB: 1<br>PB: 1<br>DB: 1<br>AB: 1<br>RB: 1<br>OB: 1     | AMSTAR: 7 | BDI                              | 8 weeks    | Severity:<br>– Sign. greater effects than PLACEBO (1 RCT; SMD=-0.73; 95%CI=[-1.37,-0.09]; I <sup>2</sup> =n.c.; N=40; ⊕○○○ very low <sup>c,d,e</sup> )                                                                                                                                                                                                                                                                                                                                                                                                                                                                                                                                                                                                             | – N.r.                                                                                                                                            |
| 32 | <b>S-adenosyl methionine</b> | Galizia 2016 <sup>145</sup>  | MDD | 8 RCTs  | SB: 2<br>PB: 4<br>DB: 4<br>AB: 3<br>RB: 8<br>OB: 8     | AMSTAR: 9 | HAMD                             | 6-12 weeks | Severity:<br>– No sign. effects versus PLACEBO (2 RCTs; SMD=-0.54; 95%CI=[-1.54,0.46]; I <sup>2</sup> =72%; p=.06; N=142; ⊕○○○ very low <sup>c,d,e</sup> )<br>– Similar effects as SSRI/TCA (5 RCTs; SMD=-0.01; 95%CI=[-0.22,0.21]; I <sup>2</sup> =43%; p=.14; N=821; ⊕⊕○○ low <sup>a,e</sup> ) <sup>§</sup><br>– Sign. effects as adjunctive to SSRI versus PLACEBO + SSRI (1 RCT; SMD=-0.59;                                                                                                                                                                                                                                                                                                                                                                    | – Similar AEs as PLACEBO (2 RCTs; RR=0.70; 95%CI=[0.16,3.01]; I <sup>2</sup> =n.r.; N=142)<br>– Similar AEs as adjunctive to ADM (1 RCT, RR=0.58; |

|                                |                                |     |        |                                                             |           |                |                |                                                                                                                                                                                                                                                                                                                                                                                                                                                                                                                                                                                                        |                                                                                                                                                    |
|--------------------------------|--------------------------------|-----|--------|-------------------------------------------------------------|-----------|----------------|----------------|--------------------------------------------------------------------------------------------------------------------------------------------------------------------------------------------------------------------------------------------------------------------------------------------------------------------------------------------------------------------------------------------------------------------------------------------------------------------------------------------------------------------------------------------------------------------------------------------------------|----------------------------------------------------------------------------------------------------------------------------------------------------|
|                                |                                |     |        |                                                             |           |                |                | 95%CI=[-1.06,-0.12]; I <sup>2</sup> =n.c.; N=73;<br>⊕○○○ very low <sup>c,d,e</sup> #                                                                                                                                                                                                                                                                                                                                                                                                                                                                                                                   | 95%CI=[0.10,3.28];<br>I <sup>2</sup> =n.c.; N=73<br>– Similar AEs as ADM (2<br>RCTs, RR=0.75;<br>95%CI=[0.20,2.79];<br>I <sup>2</sup> =n.r.; N=52) |
| <b>Tryptophan</b>              | Shaw<br>2002 <sup>157</sup>    | CSD | 2 RCTs | SB: 2<br>PB: 2<br>DB: n.r.<br>AB: 1<br>RB: n.r.<br>OB: n.r. | AMSTAR: 7 | HAMD           | 3-12<br>weeks  | Response:<br>– Sign. greater effects than PLACEBO (2<br>RCTs; OR=4.10; 95%CI=[1.28,13.15];<br>I <sup>2</sup> =0%; p=.32; N=46; ⊕○○○ very<br>low <sup>a,d,e</sup> )                                                                                                                                                                                                                                                                                                                                                                                                                                     | – Sign. greater AEs<br>than PLACEBO (2<br>RCTs; OR=7.41;<br>95%CI=[1.01,54.19];<br>I <sup>2</sup> =0%; p=1.0; N=64)                                |
| <b>Vitamin B9<br/>(Folate)</b> | Taylor<br>2003 <sup>159</sup>  | MDD | 2 RCTs | SB: 0<br>PB: 2<br>DB: n.r.<br>AB: 2<br>RB: n.r.<br>OB: n.r. | AMSTAR: 8 | HAMD           | 10-24<br>weeks | Severity:<br>– Sign. greater effects as adjunctive to SSRI<br>versus PLACEBO + SSRI (2 RCTs; SMD=-<br>0.40; 95%CI=[-0.76,-0.05]; I <sup>2</sup> =0%; p=.96;<br>N=124; ⊕○○○ very low <sup>a,c,d,e</sup> )#                                                                                                                                                                                                                                                                                                                                                                                              | – Similar AEs as<br>PLACEBO (1 RCT;<br>RR=0.76;<br>95%CI=[0.55,1.05];<br>I <sup>2</sup> =n.c.; N=127)                                              |
|                                | Almeida<br>2015 <sup>139</sup> | MDD | 5 RCTs | SB: 4<br>PB: 5<br>DB: 4<br>AB: 3<br>RB: 4<br>OB: 1          | AMSTAR: 6 | HAMD,<br>MADRS | 4-52<br>weeks  | Severity:<br>– No sign. effects as adjunctive to SSRI versus<br>PLACEBO + SSRI (5 RCTs; SMD=-0.12;<br>95%CI=[-0.45,0.22]; I <sup>2</sup> =66%; p=.02; N=505;<br>⊕○○○ very low <sup>c,d,e</sup> )<br>Response (50%):<br>– No sign. effects as adjunctive to SSRI versus<br>PLACEBO + SSRI (4 RCTs; OR=1.18;<br>95%CI=[0.49,2.83]; I <sup>2</sup> =73%; p=.001; N=478;<br>⊕○○○ very low <sup>c,d,e</sup> )<br>Relapse:<br>– Sign. greater effects as adjunctive to SSRI<br>versus PLACEBO + SSRI (1 RCT, OR=0.33;<br>95%CI=[0.12,0.94]; I <sup>2</sup> =n.c.; N=153;<br>⊕○○○ very low <sup>c,d,e</sup> ) | – N.r.                                                                                                                                             |

|                  |                                |                    |                                                          |           |                         |                                                                                                                                                                                            |        |
|------------------|--------------------------------|--------------------|----------------------------------------------------------|-----------|-------------------------|--------------------------------------------------------------------------------------------------------------------------------------------------------------------------------------------|--------|
| <b>Vitamin D</b> | Shaffer<br>2014 <sup>156</sup> | MDD, 2 RCTs<br>CSD | SB: 0<br>PB: 0<br>DB: 1<br>AB: 0<br>RB: n.r.<br>OB: n.r. | AMSTAR: 7 | HAMD, 8 weeks<br>BDI    | Severity:<br>– Sign. greater effects than PLACEBO (2 RCTs; SMD=-0.60; 95%CI=[-1.19,-0.01]; I <sup>2</sup> =n.r.; N=149; ⊕○○○ very low <sup>a,c,d,e</sup> )                                 | – N.r. |
| <b>Zinc</b>      | Schefft<br>2017 <sup>155</sup> | MDD 3 RCTs         | N.r.                                                     | AMSTAR: 5 | HAMD, 6-12 weeks<br>BDI | Severity:<br>– Sign. greater effects as adjunctive to SSRI/TCA versus SSRI/TCA (3 RCTs; SMD=-0.66; 95%CI=[-1.06,-0.26]; I <sup>2</sup> =0%; p=.45; N=104; ⊕○○○ very low <sup>b,d,e</sup> ) | – N.r. |

Abbreviations: AB: Attrition bias; ADM: Antidepressant medication; AE: Adverse events; AMSTAR: Assessment of the Methodological Quality of Systematic Reviews tool; BDI: Beck Depression Inventory; CBT: Cognitive Behavioral Therapy; CESD: Center for Epidemiologic Studies Depression Scale; CSD: Clinical symptoms of depression (questionnaire based diagnosis); DB: Detection bias; GDS: Geriatric Depression Scale; HADS: Hospital Anxiety and Depression Scale; HAMD: Hamilton Rating Scale for Depression; HR: Hazard ratio; HSCL: Hopkins Symptom Checklist Depression Scale; I<sup>2</sup>: Heterogeneity; IDS: Inventory of Depressive Symptomology; MADRS: Montgomery-Asberg Depression Rating Scale; MBCT: Mindfulness-based Cognitive Therapy; MBSR: Mindfulness-based Stress Reduction; MDD: Major depressive disorder; MND: Mixed non-seasonal depression; N: Number of patients; N.c.: Not calculable because of only one included RCT; N.r.: Not reported; OB: Other bias; OR: Odds ratio; PB: Performance bias; RCT: Randomized controlled trial; RB: Reporting bias; RR: Risk ratio; SAD: Seasonal Affective Disorder; SB: Selection bias; SCID: Structured Clinical Interview; SIGH-SAD: Structured Interview Guide for the Hamilton Depression Rating Scale-Seasonal Affective Disorders; SMD: Standard mean difference; SSRI: Selective serotonin reuptake inhibitors; SNRI: Serotonin-norepinephrine reuptake inhibitor; TAU: Treatment as usual; TCA: Tricyclic antidepressants; TECA: Tetracyclic antidepressants; ZGS: Zung Depression Scale;

\*Newly calculated effect measure of selected RCTs meeting eligibility criteria;

#Newly calculated effect measure from mean differences (MDs);

§Newly calculated effect measure from originally separate/combined analyses;

<sup>a</sup>Downgraded one level because of study limitations (overall unclear or high risk of bias);

<sup>b</sup>Downgraded two levels because of study limitations (overall unclear or high risk of bias) and limitations of the meta-analysis (AMSTAR ≤ 5).

<sup>c</sup>Downgraded one level because of inconsistency (significant heterogeneity or no replication of the results);

<sup>d</sup>Downgraded one level because of imprecision (confidence interval includes negligible or no effects or fewer than 250 participants were included in total);

<sup>e</sup>Downgraded one level because of a probably high risk of publication bias.

## Supplementary information to “Complementary therapies for clinical depression: an overview of systematic reviews”

by Heidemarie Haller, Dennis Anheyer, Holger Cramer, Gustav Dobos

**Supplementary table 2: Detailed AMSTAR ratings.**

|                                | Apriori design | Two data extractor and consensus | Comprehensive literature search | Inclusion of grey literature | List of included & excluded studies | Characteristics of studies provided | Adequate risk of bias assessment | Appropriate conclusions | Appropriate data syntheses | Assessment of publication bias | Conflict of interest / funding statement | Sum |
|--------------------------------|----------------|----------------------------------|---------------------------------|------------------------------|-------------------------------------|-------------------------------------|----------------------------------|-------------------------|----------------------------|--------------------------------|------------------------------------------|-----|
| Aalbers 2017 <sup>138</sup>    | 1              | 1                                | 1                               | 1                            | 1                                   | 1                                   | 1                                | 1                       | 1                          | 1                              | 1                                        | 11  |
| Almeida 2015 <sup>139</sup>    | 0              | 1                                | 1                               | 0                            | 0                                   | 1                                   | 1                                | 1                       | 1                          | 0                              | 0                                        | 6   |
| Anderson 2015 <sup>140</sup>   | 0              | 0                                | 1                               | 1                            | 0                                   | 1                                   | 1                                | 1                       | 1                          | 1                              | 0                                        | 7   |
| Apaydin 2016 <sup>141</sup>    | 1              | 1                                | 1                               | 1                            | 0                                   | 1                                   | 1                                | 1                       | 1                          | 0                              | 1                                        | 9   |
| Appleton 2015 <sup>142</sup>   | 0              | 1                                | 1                               | 1                            | 1                                   | 1                                   | 1                                | 1                       | 1                          | 1                              | 0                                        | 9   |
| Bo 2017 <sup>143</sup>         | 0              | 0                                | 1                               | 0                            | 0                                   | 1                                   | 1                                | 1                       | 1                          | 1                              | 0                                        | 6   |
| Cramer 2013 <sup>144</sup>     | 0              | 1                                | 1                               | 1                            | 1                                   | 1                                   | 1                                | 1                       | 0                          | 1                              | 0                                        | 8   |
| Galizia 2016 <sup>145</sup>    | 0              | 1                                | 1                               | 1                            | 1                                   | 1                                   | 1                                | 1                       | 1                          | 1                              | 0                                        | 9   |
| Hausenblas 2013 <sup>146</sup> | 0              | 1                                | 1                               | 1                            | 0                                   | 1                                   | 1                                | 1                       | 1                          | 0                              | 0                                        | 7   |
| Huang 2013 <sup>147</sup>      | 0              | 1                                | 1                               | 0                            | 0                                   | 1                                   | 1                                | 1                       | 1                          | 1                              | 0                                        | 7   |
| Kuyken 2016 <sup>148</sup>     | 0              | 0                                | 1                               | 0                            | 0                                   | 1                                   | 1                                | 1                       | 1                          | 1                              | 0                                        | 6   |
| Linde 2008 <sup>149</sup>      | 0              | 1                                | 1                               | 1                            | 0                                   | 1                                   | 1                                | 1                       | 1                          | 1                              | 0                                        | 8   |
| Liu 2015 <sup>150</sup>        | 0              | 0                                | 1                               | 0                            | 0                                   | 1                                   | 0                                | 1                       | 0                          | 1                              | 0                                        | 4   |
| Martensson 2015 <sup>151</sup> | 0              | 1                                | 1                               | 0                            | 1                                   | 1                                   | 0                                | 1                       | 0                          | 0                              | 0                                        | 5   |
| Meekums 2015 <sup>152</sup>    | 0              | 1                                | 1                               | 1                            | 1                                   | 1                                   | 1                                | 1                       | 1                          | 1                              | 0                                        | 9   |
| Mukai 2014 <sup>153</sup>      | 0              | 1                                | 1                               | 0                            | 0                                   | 1                                   | 0                                | 1                       | 0                          | 0                              | 0                                        | 4   |
| Ng 2017 <sup>154</sup>         | 0              | 1                                | 1                               | 0                            | 0                                   | 1                                   | 1                                | 1                       | 1                          | 0                              | 0                                        | 6   |
| Schefft 2017 <sup>155</sup>    | 0              | 1                                | 1                               | 0                            | 0                                   | 1                                   | 0                                | 1                       | 1                          | 0                              | 0                                        | 5   |
| Shaffer 2014 <sup>156</sup>    | 0              | 1                                | 1                               | 1                            | 1                                   | 1                                   | 1                                | 1                       | 0                          | 0                              | 0                                        | 7   |
| Shaw 2002 <sup>157</sup>       | 0              | 1                                | 1                               | 1                            | 1                                   | 1                                   | 0                                | 1                       | 1                          | 0                              | 0                                        | 7   |
| Smith 2018 <sup>50</sup>       | 1              | 1                                | 1                               | 1                            | 1                                   | 1                                   | 1                                | 1                       | 1                          | 1                              | 0                                        | 10  |
| Strauss 2014 <sup>158</sup>    | 0              | 0                                | 1                               | 1                            | 0                                   | 1                                   | 0                                | 0                       | 1                          | 1                              | 0                                        | 5   |
| Taylor 2003 <sup>159</sup>     | 0              | 1                                | 1                               | 1                            | 1                                   | 1                                   | 1                                | 1                       | 1                          | 0                              | 0                                        | 8   |
| Tuunainen 2004 <sup>160</sup>  | 0              | 1                                | 1                               | 1                            | 1                                   | 1                                   | 1                                | 1                       | 1                          | 1                              | 0                                        | 9   |
| Yeung 2014 <sup>161</sup>      | 0              | 1                                | 1                               | 0                            | 0                                   | 0                                   | 1                                | 1                       | 0                          | 0                              | 0                                        | 4   |
| Zhao 2016 <sup>162</sup>       | 0              | 1                                | 1                               | 0                            | 0                                   | 1                                   | 1                                | 1                       | 1                          | 1                              | 0                                        | 7   |

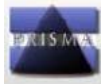

# PRISMA 2009 Checklist

| Section/topic                      | #  | Checklist item                                                                                                                                                                                                                                                                                              | Reported on page # |
|------------------------------------|----|-------------------------------------------------------------------------------------------------------------------------------------------------------------------------------------------------------------------------------------------------------------------------------------------------------------|--------------------|
| <b>TITLE</b>                       |    |                                                                                                                                                                                                                                                                                                             |                    |
| Title                              | 1  | Identify the report as a systematic review, meta-analysis, or both.                                                                                                                                                                                                                                         | 1                  |
| <b>ABSTRACT</b>                    |    |                                                                                                                                                                                                                                                                                                             |                    |
| Structured summary                 | 2  | Provide a structured summary including, as applicable: background; objectives; data sources; study eligibility criteria, participants, and interventions; study appraisal and synthesis methods; results; limitations; conclusions and implications of key findings; systematic review registration number. | 2                  |
| <b>INTRODUCTION</b>                |    |                                                                                                                                                                                                                                                                                                             |                    |
| Rationale                          | 3  | Describe the rationale for the review in the context of what is already known.                                                                                                                                                                                                                              | 4                  |
| Objectives                         | 4  | Provide an explicit statement of questions being addressed with reference to participants, interventions, comparisons, outcomes, and study design (PICOS).                                                                                                                                                  | 4                  |
| <b>METHODS</b>                     |    |                                                                                                                                                                                                                                                                                                             |                    |
| Protocol and registration          | 5  | Indicate if a review protocol exists, if and where it can be accessed (e.g., Web address), and, if available, provide registration information including registration number.                                                                                                                               | 5                  |
| Eligibility criteria               | 6  | Specify study characteristics (e.g., PICOS, length of follow-up) and report characteristics (e.g., years considered, language, publication status) used as criteria for eligibility, giving rationale.                                                                                                      | 5                  |
| Information sources                | 7  | Describe all information sources (e.g., databases with dates of coverage, contact with study authors to identify additional studies) in the search and date last searched.                                                                                                                                  | 6                  |
| Search                             | 8  | Present full electronic search strategy for at least one database, including any limits used, such that it could be repeated.                                                                                                                                                                               | 6                  |
| Study selection                    | 9  | State the process for selecting studies (i.e., screening, eligibility, included in systematic review, and, if applicable, included in the meta-analysis).                                                                                                                                                   | 6                  |
| Data collection process            | 10 | Describe method of data extraction from reports (e.g., piloted forms, independently, in duplicate) and any processes for obtaining and confirming data from investigators.                                                                                                                                  | 6                  |
| Data items                         | 11 | List and define all variables for which data were sought (e.g., PICOS, funding sources) and any assumptions and simplifications made.                                                                                                                                                                       | 6                  |
| Risk of bias in individual studies | 12 | Describe methods used for assessing risk of bias of individual studies (including specification of whether this was done at the study or outcome level), and how this information is to be used in any data synthesis.                                                                                      | 6-7                |
| Summary measures                   | 13 | State the principal summary measures (e.g., risk ratio, difference in means).                                                                                                                                                                                                                               | 7                  |
| Synthesis of results               | 14 | Describe the methods of handling data and combining results of studies, if done, including measures of consistency (e.g., I <sup>2</sup> ) for each meta-analysis.                                                                                                                                          | 7                  |

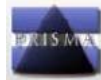

# PRISMA 2009 Checklist

Page 1 of 2

| Section/topic                 | #  | Checklist item                                                                                                                                                                                           | Reported on page # |
|-------------------------------|----|----------------------------------------------------------------------------------------------------------------------------------------------------------------------------------------------------------|--------------------|
| Risk of bias across studies   | 15 | Specify any assessment of risk of bias that may affect the cumulative evidence (e.g., publication bias, selective reporting within studies).                                                             | N.a.               |
| Additional analyses           | 16 | Describe methods of additional analyses (e.g., sensitivity or subgroup analyses, meta-regression), if done, indicating which were pre-specified.                                                         | N.a.               |
| <b>RESULTS</b>                |    |                                                                                                                                                                                                          |                    |
| Study selection               | 17 | Give numbers of studies screened, assessed for eligibility, and included in the review, with reasons for exclusions at each stage, ideally with a flow diagram.                                          | 8                  |
| Study characteristics         | 18 | For each study, present characteristics for which data were extracted (e.g., study size, PICOS, follow-up period) and provide the citations.                                                             | 8-9                |
| Risk of bias within studies   | 19 | Present data on risk of bias of each study and, if available, any outcome level assessment (see item 12).                                                                                                | 8-9                |
| Results of individual studies | 20 | For all outcomes considered (benefits or harms), present, for each study: (a) simple summary data for each intervention group (b) effect estimates and confidence intervals, ideally with a forest plot. | 9-18               |
| Synthesis of results          | 21 | Present results of each meta-analysis done, including confidence intervals and measures of consistency.                                                                                                  | 19-29              |
| Risk of bias across studies   | 22 | Present results of any assessment of risk of bias across studies (see Item 15).                                                                                                                          | N.a.               |
| Additional analysis           | 23 | Give results of additional analyses, if done (e.g., sensitivity or subgroup analyses, meta-regression [see Item 16]).                                                                                    | N.a.               |
| <b>DISCUSSION</b>             |    |                                                                                                                                                                                                          |                    |
| Summary of evidence           | 24 | Summarize the main findings including the strength of evidence for each main outcome; consider their relevance to key groups (e.g., healthcare providers, users, and policy makers).                     | 18-19              |
| Limitations                   | 25 | Discuss limitations at study and outcome level (e.g., risk of bias), and at review-level (e.g., incomplete retrieval of identified research, reporting bias).                                            | 19-50              |
| Conclusions                   | 26 | Provide a general interpretation of the results in the context of other evidence, and implications for future research.                                                                                  | 21-22              |
| <b>FUNDING</b>                |    |                                                                                                                                                                                                          |                    |
| Funding                       | 27 | Describe sources of funding for the systematic review and other support (e.g., supply of data); role of funders for the systematic review.                                                               | 23                 |

From: Moher D, Liberati A, Tetzlaff J, Altman DG, The PRISMA Group (2009). Preferred Reporting Items for Systematic Reviews and Meta-Analyses: The PRISMA Statement. PLoS Med 6(7): e1000097. doi:10.1371/journal.pmed1000097

For more information, visit: [www.prisma-statement.org](http://www.prisma-statement.org).

Page 2 of 2

For peer review only - <http://bmjopen.bmj.com/site/about/guidelines.xhtml>

# BMJ Open

## Complementary therapies for clinical depression: an overview of systematic reviews

|                                 |                                                                                                                                                                                                                                                                                                                                                                                                                                                                                                                                                                          |
|---------------------------------|--------------------------------------------------------------------------------------------------------------------------------------------------------------------------------------------------------------------------------------------------------------------------------------------------------------------------------------------------------------------------------------------------------------------------------------------------------------------------------------------------------------------------------------------------------------------------|
| Journal:                        | <i>BMJ Open</i>                                                                                                                                                                                                                                                                                                                                                                                                                                                                                                                                                          |
| Manuscript ID                   | bmjopen-2018-028527.R1                                                                                                                                                                                                                                                                                                                                                                                                                                                                                                                                                   |
| Article Type:                   | Research                                                                                                                                                                                                                                                                                                                                                                                                                                                                                                                                                                 |
| Date Submitted by the Author:   | 20-Mar-2019                                                                                                                                                                                                                                                                                                                                                                                                                                                                                                                                                              |
| Complete List of Authors:       | Haller, Heidemarie; Universitat Duisburg-Essen, Department of Internal and Integrative Medicine, Kliniken Essen-Mitte, Faculty of Medicine<br>Anheyer, Dennis; Universitat Duisburg-Essen, Department of Internal and Integrative Medicine, Kliniken Essen-Mitte, Faculty of Medicine<br>Cramer, Holger; Universitat Duisburg-Essen, Department of Internal and Integrative Medicine, Kliniken Essen-Mitte, Faculty of Medicine<br>Dobos, Gustav; Universitat Duisburg-Essen, Department of Internal and Integrative Medicine, Kliniken Essen-Mitte, Faculty of Medicine |
| <b>Primary Subject Heading</b>: | Complementary medicine                                                                                                                                                                                                                                                                                                                                                                                                                                                                                                                                                   |
| Secondary Subject Heading:      | Mental health, Patient-centred medicine                                                                                                                                                                                                                                                                                                                                                                                                                                                                                                                                  |
| Keywords:                       | Depression, Complementary Therapies, Treatment Outcome, Safety, Systematic Review, Meta-analysis                                                                                                                                                                                                                                                                                                                                                                                                                                                                         |
|                                 |                                                                                                                                                                                                                                                                                                                                                                                                                                                                                                                                                                          |

SCHOLARONE™  
Manuscripts



1  
2 1 **Complementary therapies for clinical depression: an overview of systematic reviews**  
3

4 2

5  
6 3

7  
8 4 Heidemarie Haller<sup>1\*</sup>, Dennis Anheyer<sup>1</sup>, Holger Cramer<sup>1</sup>, Gustav Dobos<sup>1</sup>  
9

10  
11 5

12  
13 6 <sup>1</sup> Department of Internal and Integrative Medicine, Kliniken Essen-Mitte, Faculty of Medicine,  
14

15 7 University of Duisburg-Essen, Essen, Germany.  
16

17 8

18  
19 9

20  
21  
22 10

23  
24 11 \*Corresponding author

25  
26 12 Heidemarie Haller

27  
28  
29 13 Department of Internal and Integrative Medicine, Kliniken Essen-Mitte, Faculty of Medicine,  
30

31 14 University of Duisburg-Essen

32  
33 15 Am Deimelsberg 34a, 45276 Essen, Germany

34  
35 16 Tel: +4920117425044

36  
37 17 E-mail: h.haller@kem-med.com  
38  
39  
40  
41  
42  
43  
44  
45  
46  
47  
48  
49  
50  
51  
52  
53  
54  
55  
56  
57  
58  
59  
60

**Abstract**

Objectives: As clinical practice guidelines vary widely in their search strategies and recommendations of complementary and alternative medicine (CAM) for depression, this overview aimed at systematically summarizing the level-1 evidence on CAM for patients with a clinical diagnosis of depression.

Methods: PubMed, PsycInfo and Central were searched for meta-analyses of randomized controlled trials (RCTs) until June 30, 2018. Outcomes included depression severity, response, remission, relapse, and adverse events. The quality of evidence was assessed according to GRADE considering the methodological quality of the RCTs (ROB) and meta-analyses (AMSTAR), inconsistency, indirectness, imprecision of the evidence, and the potential risk of publication bias.

Results: The literature search revealed 26 meta-analyses conducted between 2002 and 2018 on 1 to 49 RCTs in major, minor, and seasonal depression. In patients with mild to moderate major depression, moderate quality evidence suggested the efficacy of St. John's wort towards placebo and its comparative effectiveness towards standard antidepressants for the treatment for depression severity and response rates, while St. John's wort caused significant less adverse events. In patients with recurrent major depression, moderate quality evidence showed that Mindfulness-based Cognitive Therapy was superior to standard antidepressant drug treatment for the prevention of depression relapse. Other CAM evidence was considered as having low or very low quality.

Conclusions: The effects of all but two CAM treatments found in studies on clinical depressed patients based on low to very low quality of evidence. The evidence has to be downgraded mostly due to avoidable methodological flaws of both the original RCTs and meta-analyses not following the CONSORT and PRISMA guidelines. Further research is needed.

Keywords: Depression, Complementary Therapies, Treatment Outcome, Safety, Systematic Review

1  
2 41 **Strengths and limitations of this study**  
3

- 4 42     ▪ This systematic overview included the comprehensive literature search of important CAM  
5  
6 43     topics defined by the Cochrane Collaboration.  
7  
8 44     ▪ The inclusion criteria were restricted to meta-analyses of RCTs of patients with a clinical  
9  
10 45     diagnosis of depression.  
11  
12  
13 46     ▪ The quality of evidence from meta-analyses was assessed according to GRADE.  
14  
15 47     ▪ There is a possible lack of evidence of newer RCTs, which have not been analysed by the  
16  
17 48     included meta-analyses.  
18  
19  
20  
21  
22  
23  
24  
25  
26  
27  
28  
29  
30  
31  
32  
33  
34  
35  
36  
37  
38  
39  
40  
41  
42  
43  
44  
45  
46  
47  
48  
49  
50  
51  
52  
53  
54  
55  
56  
57  
58  
59  
60

## 49 Introduction

50 Depression is one of the most prevalent psychiatric disorders, with about 25% of women and 12% of  
51 men suffering from at least one depressive episode during their lifetime.<sup>1-3</sup> According to the criteria  
52 for diagnosis recommended by the American Psychiatric Association (APA), depressive disorders can  
53 be distinguished by their degree of severity or duration and are also characterized by a high  
54 comorbidity and an increase of psychological strain for the affected person.<sup>4</sup> It is evident, that a  
55 strong comorbid connection to several chronic conditions like addictions,<sup>5</sup> neurodegenerative  
56 diseases,<sup>6,7</sup> or different psychiatric diseases<sup>8-11</sup> exists. This leads depressive disorders as one of the  
57 leading causes of disability worldwide.<sup>12</sup>

58 The most commonly used treatments for depression are antidepressants, psychotherapy, or a  
59 combination of drugs and psychotherapy. While both treatment strategies (alone and in  
60 combination) have been shown to be effective,<sup>13-15</sup> more recent meta-analyses also found high  
61 dropout and low remission rates<sup>16-21</sup> as well as clinically significant differences between  
62 antidepressant drugs and placebos only for patients at the upper end of the very severely depressed  
63 category.<sup>22</sup> This may lead patients to search for alternatives. Increasing mainstream use of  
64 complementary and alternative medicine (CAM) support this trend, particularly for different physical  
65 conditions with comorbid affective disorders.<sup>23-27</sup> While some complementary therapies have  
66 become a promising adjunct in the standard treatment of depression,<sup>28,29</sup> others are known for their  
67 possible side effects or interactions with standard drugs.<sup>29</sup> Recent clinical practice guidelines, in  
68 addition, vary widely in their search strategies and resulting recommendations for CAM treatments.  
69 While the ACP,<sup>30</sup> APA,<sup>31</sup> and CANMAT guideline<sup>32</sup> provide a more comprehensive overview and  
70 critical appraisal of CAM treatments, the DGPPN,<sup>33</sup> NICE,<sup>34</sup> and WFSBP<sup>35</sup> guidelines mainly focus on  
71 St. John's Wort and light therapy. Possible effects and risks of further CAM therapies are not  
72 discussed. Thus, the purpose of this overview is to provide a comprehensive search strategy of  
73 relevant CAM terms and systematically summarize the existing level-1 evidence for clinical  
74 depression as a basis for further guideline recommendations on the efficacy, effectiveness, and  
75 safety of CAM therapies.

## 76 **Methods**

77 This systematic overview of reviews was conducted in accordance with the Preferred Reporting Items  
78 for Systematic Reviews and Meta-Analyses (PRISMA) guidelines<sup>36 37</sup> and the recommendations of the  
79 Cochrane Collaboration.<sup>38</sup> The protocol was not prospectively registered.

## 80 **Patient and Public Involvement**

81 For this overview of reviews, patients or public were not involved.

## 82 **Inclusion and exclusion criteria**

- 83 – Types of studies: To be eligible, articles had to be systematic reviews with meta-analyses of  
84 randomized controlled clinical trials (RCTs) published in peer-reviewed journals. Conference  
85 abstracts or unpublished work were excluded as well as reviews summarizing evidence  
86 narratively. In cases of including same or similar original studies, only the review with the  
87 most recent, most comprehensive search was included. When systematic reviews reported  
88 results of RCTs as well as of designs of lower evidence levels, they were considered only if  
89 separate meta-analyses for the included RCTs were performed.
- 90 – Types of participants: Only reviews of patients with a diagnosis of major depression or  
91 dysthymia were eligible as well as reviews including patients/general population samples  
92 with mild depressive symptoms above a clinical cut off or seasonal patterns. In contrast,  
93 reviews studying depressive symptoms within specific subpopulations of substance-induced  
94 or demented patients, secondary depression due to another medical condition (e.g. post-  
95 stroke, cancer, or pain patients), bipolar disorders, or females with premenstrual dysphoric  
96 disorder or postpartum depression were excluded. Further restrictions regarding the  
97 diagnostic criteria or procedures, regarding age, gender, duration of the condition, or  
98 symptom intensity were not applied.
- 99 – Types of interventions: Reviews investigating the effectiveness and/or safety of a single,  
100 adjunctive or combined CAM treatment were included. For the classification of CAM  
101 treatments the definition of the US National Institutes of Health<sup>39</sup> was followed. CAM

1  
2 102 interventions have to be compared against treatment as usual (TAU)/waiting list,  
3  
4 103 placebo/sham, or standard medical care.  
5  
6 104 – Types of outcomes: Reviews were eligible if they assessed at least one measure of  
7  
8 105 effectiveness such as severity of depressive symptoms, response rate (generally defined as a  
9  
10 106 50% decrease in depression scores after a period of up to 12 weeks of treatment),<sup>30</sup>  
11  
12 107 remission rate (generally defined as a period of up to 12 weeks during which a patient is  
13  
14 108 asymptomatic or has only few symptoms to a very mild degree).<sup>40</sup> relapse rates, and/or a  
15  
16 109 measure of safety such as number of adverse events (AE), drug interactions, or numbers  
17  
18 110 needed to harm for study withdrawal due to side effects.  
19  
20  
21  
22

### 23 111 **Search strategy**

24  
25 112 Electronic literature was systematically searched via PubMed, PsycInfo and Central from their  
26  
27 113 inception to January 31, 2018 without restrictions regarding time or language. Search terms for CAM  
28  
29 114 treatments were selected in accordance with Cochrane recommendations (Table 1).<sup>41</sup> Additional  
30  
31 115 manual search included reference lists of previously published reviews<sup>14 28 29 42</sup> and clinical practice  
32  
33 116 guidelines.<sup>30-35</sup> Using PubMed Informer,<sup>43</sup> the search was updated until June 30, 2018.  
34  
35  
36

### 37 117 **Study selection process**

38  
39 118 To assess eligibility, articles were selected by screening titles and abstracts independently by two  
40  
41 119 authors (HH and DA). Any abstract considered potentially eligible by at least one author was read in  
42  
43 120 full to decide on its eligibility. Disagreements were rechecked with a third author (HC) until  
44  
45 121 consensus was achieved.  
46  
47  
48

### 49 122 **Data extraction and quality assessment**

50  
51 123 Two authors (HH and DA) independently extracted data on the characteristics of the reviews  
52  
53 124 including the type of the intervention, the year of publication, the number and quality of the original  
54  
55 125 RCTs, the total number and age of the participants, and effectiveness and safety outcomes. The  
56  
57 126 quality of the included reviews was assessed using the Assessment of the Methodological Quality of  
58  
59 127 Systematic Reviews (AMSTAR) tool.<sup>44</sup> The AMSTAR tool consists of 11 items asking about important  
60  
128 methodological quality criteria of systematic reviews such as: a published apriori design, duplicate

1  
2 129 study selection and data extraction, a comprehensive literature search including grey literature, a list  
3  
4 130 of included and excluded studies, summarized characteristics and quality assessment of included  
5  
6 131 studies, assessment of publication bias, appropriate method of data syntheses and deducing  
7  
8 132 conclusions, and a conflict of interests statement. AMSTAR has shown good construct validity and  
9  
10 133 inter-rater reliability. The Intraclass Correlation Coefficient (ICC) of the total AMSTAR score of 11  
11  
12 134 points was reported as 0.84.<sup>45</sup> For this analysis, the two authors (HH and DA) who independently  
13  
14 135 assessed AMSTAR reached an ICC of 0.96. Disagreements regarding content or quality of the reviews  
15  
16 136 were rechecked with a third author (HC) and resolved by agreement.  
17  
18  
19

### 20 137 **Data synthesis**

21  
22 138 Results were pooled qualitatively by type of the intervention. Outcomes had to be calculated as  
23  
24 139 standard mean differences (SMDs), risk ratios (RRs), hazard ratios (HR), or odds ratios (ORs). If meta-  
25  
26 140 analyses displayed mean differences (MDs), SMDs were calculated using Review Manager Software  
27  
28 141 (RevMan, Version 5.3, The Nordic Cochrane Centre, Copenhagen) for better comparability of the  
29  
30 142 results. RevMan was also used to exclude SMDs/RRs/HRs/ORs of selective RCTs that did not fulfil  
31  
32 143 eligibility criteria of this overview. Effect sizes were classified according to Cohen as SMDs of 0.2 to  
33  
34 144 0.49 = small effect, SMDs of 0.5 – 0.79 = medium effect, and SMDs of > 0.8 = large effect (absolute  
35  
36 145 values)<sup>46</sup> with higher reduction of/improvement in depression scores represented by more negative  
37  
38 146 SMDs or RRs/HRs/ORs less than 1. According to the NICE guideline, a SMD of  $\geq 0.5$  or  $\leq -0.5$ ,  
39  
40 147 respectively was considered as a clinically relevant reduction of depression severity.<sup>47</sup> Statistical  
41  
42 148 heterogeneity between studies was assessed by the chi-squared test with a p-value of  $\leq .10$   
43  
44 149 indicating significant heterogeneity. The magnitude of heterogeneity was categorized by the  $I^2$   
45  
46 150 statistic with  $I^2$  of 0 to 24% = no heterogeneity,  $I^2$  of 25% to 49% = moderate heterogeneity,  $I^2$  of 50%  
47  
48 151 to 74% = substantial heterogeneity, and  $I^2$  of 75% to 100% = considerable heterogeneity.<sup>38</sup>  
49  
50  
51  
52  
53

### 54 152 **Quality of evidence**

55  
56  
57 153 The quality of evidence was assessed according to the Grades of Recommendation, Assessment,  
58  
59 154 Development, and Evaluation (GRADE) approach<sup>48</sup> individually by two authors (HH and DA).  
60  
155 Disagreements were rechecked with a third author (HC) until consensus was achieved. For each

1  
2 156 outcome, the evidence can be graded as high, moderate, low or very low. Evidence from RCTs is  
3  
4 157 initially assessed as high, but can be downgraded by one level for serious or two levels for very  
5  
6 158 serious limitations of the study quality (of both RCTs and meta-analyses), inconsistency of the results,  
7  
8 159 indirectness of the evidence, imprecision of the results, and a potential risk of publication bias (as  
9  
10 160 assessed by the included meta-analyses).<sup>48</sup>  
11  
12  
13  
14

## 15 161 **Results**

### 16 162 **Study selection**

17 163 A total of 3582 potentially eligible articles were identified by electronic database search. One  
18  
19 164 additional review was retrieved from manual search,<sup>49</sup> one from the updated search until June  
20  
21 165 2018.<sup>50</sup> After removing duplicates, 2639 articles were excluded by screening of titles and abstracts.  
22  
23 166 The remaining 117 articles were read in full, of which further 91 reviews had to be excluded (Figure  
24  
25 167 1). Reasons for exclusion comprised 55 reviews where newer and/or more comprehensive reviews  
26  
27 168 on higher quality evidence were available.<sup>49 51-104</sup> Further 15 reviews have to be excluded as they  
28  
29 169 systematically summarized evidence but did not performed a meta-analysis mostly due to clinical  
30  
31 170 heterogeneity or a limited number of available RCTs.<sup>105-119</sup> Eight reviews were excluded as they  
32  
33 171 included mixed depressive samples of bipolar or postpartum cases and did not provide (data for)  
34  
35 172 subgroup analyses for patients with the defined depression criteria.<sup>120-127</sup> Another six reviews  
36  
37 173 contained community samples with non-clinical depression or physically ill patients with comorbid  
38  
39 174 depressive symptoms but displayed no data for patients with a primary diagnosis of depression.<sup>128-133</sup>  
40  
41 175 Four reviews performed meta-analyses on both RCTs and non-RCTs and did not perform subgroup  
42  
43 176 analyses or extracted sufficient data for post hoc analyses.<sup>134-137</sup> Three of the reviews analysed  
44  
45 177 standard instead of complementary therapies and were therefore be excluded. Finally, 26 meta-  
46  
47 178 analyses could be included and reviewed.<sup>50 138-162</sup>  
48  
49  
50  
51  
52  
53  
54

### 55 179 **Review characteristics and quality**

56  
57  
58 180 Characteristics and quality appraisal of the included meta-analyses are summarized in the  
59  
60 181 Supplementary Table 1. Meta-analyses were conducted between 2002 and 2018 and included



1  
2 182 between 1 to 49 RCTs on 40 to 7104 adult patients. Meta-analyses on children and adolescents were  
3  
4 183 not available or did not meet inclusion criteria. Samples mostly consisted of patients suffering from  
5  
6 184 major depressive disorder<sup>139-142 144-150 153 155 156 158 159</sup> but also included patients with mixed diagnoses  
7  
8 185 of non-seasonal depression,<sup>50 152 161 162</sup> patients with a diagnosis of seasonal depression,<sup>151</sup> and  
9  
10 186 patients with mild to severe symptoms of depression above a clinical cut-off.<sup>138 140 143 144 150 154 156 157</sup> All  
11  
12 187 but one meta-analysis<sup>140</sup> reported pooled outcomes based on common standardized questionnaires  
13  
14 188 or diagnostic interviews. Effects were analysed mostly up to 12 weeks of treatment (short-term),  
15  
16 189 except for four meta-analyses that included RCTs with effects reported up to 16, 24, or 32 weeks<sup>50 141</sup>  
17  
18 190 <sup>142 150 159</sup> and further three meta-analyses with long-term analyses equal to or greater than one year  
19  
20 191 <sup>148 156 162</sup>. The AMSTAR total scores of the included meta-analyses ranged between 4 and 11 points  
21  
22 192 with a median quality of 7 points. The individual AMSTAR-ratings are reported in the Supplementary  
23  
24 193 Table 2.

## 194 **Synthesis of results**

### 195 ***Acupuncture***

#### 196 *Manual acupuncture*

197 A high-quality Cochrane review meta-analysed 49 RCTs in major depressed adults as well as those  
198 with clinically relevant symptoms of depression for manual acupuncture.<sup>50</sup> For depression severity,  
199 significant effect sizes were found in comparisons to TAU and as in adjunction to standard  
200 antidepressants, while acupuncture showed similar effects to invasive sham acupuncture and  
201 standard antidepressants (Figure 2). The analyses of remission rates did not reveal superiority of  
202 acupuncture in the comparisons to TAU, invasive sham, standard antidepressants or in adjunction to  
203 standard antidepressants (Figure 3). Adverse events reported in the acupuncture groups were  
204 significantly lower than in patients treated with antidepressant drugs. However, most meta-analyses  
205 showed significant heterogeneity, a lack of RCTs with low risk of bias and a possibly serious risk of  
206 publication bias. Thus, the quality of evidence had to be downgraded to low and very low.

#### 207 *Electroacupuncture*

1  
2 208 For electroacupuncture, the same Cochrane review<sup>50</sup> revealed very low quality of evidence for the  
3  
4 209 comparisons to TAU and invasive sham for both outcomes, severity (Figure 2) and remission (Figure  
5  
6 210 3), because of serious limitations of the quality of the RCTs, imprecision, and a high risk of publication  
7  
8 211 bias. For electroacupuncture monotherapy in comparison to standard antidepressants, low quality  
9  
10 212 evidence homogeneously suggested significant greater effects for severity and similar effects for  
11  
12 213 remission. As an adjunctive treatment to antidepressants, electroacupuncture effectiveness was  
13  
14 214 supported by low quality of evidence showing a significant greater consistent and precise effect for  
15  
16 215 depression severity. Although the mean adjunctive effect can be considered as large, the analysis  
17  
18 216 based on only one RCT with overall low risk of bias and 4 RCTs of lower methodological quality that  
19  
20 217 missed to include adjunctive sham acupuncture. For remission rates, very low quality of evidence  
21  
22 218 suggested no effects in adjunction to antidepressants. In addition, one RCT showed significant less  
23  
24 219 AEs when electroacupuncture was added to standard antidepressants.  
25  
26  
27  
28

## 29 220 **Aromatherapy**

30  
31  
32 221 The literature search revealed no meta-analysis on aromatherapy. A recent systematic review  
33  
34 222 detected no RCTs in patients with a primary diagnosis of depression. However, two out of five of the  
35  
36 223 reviewed studies on inhalation aromatherapy and five out of eight studies on aromatherapy massage  
37  
38 224 have found significant anti-depressive effects in mixed patient samples and healthy adults.<sup>116</sup>  
39  
40  
41

## 42 225 **Biofeedback**

43  
44  
45 226 No meta-analysis on biofeedback was conducted to date. A recent systematic review revealed only  
46  
47 227 one RCT on the defined inclusion criteria for depression showing some effects in contrast to sham  
48  
49 228 psychotherapy.<sup>117</sup>  
50  
51

## 52 229 **Herbs**

### 53 54 55 230 *St. John's wort (Hypericum perforatum)*

56  
57  
58 231 The effectiveness of St. John's wort was meta-analysed by a Cochrane review of 29 RCTs<sup>149</sup> and a  
59  
60 232 more recent, higher quality meta-analysis of 35 RCTs.<sup>141</sup> In comparison to placebo, St. John's wort  
233 showed moderate quality evidence of significant greater reductions of depression severity (Figure 2)

1  
2 234 and response rates (Figure 4). The evidence had to be downgraded due to significant heterogeneity  
3  
4 235 because of higher effects in studies from German-speaking countries than in those from the US or  
5  
6 236 other European countries. In contrast, very low quality of evidence suggested no superiority to  
7  
8 237 placebo for remission (Figure 3) and response rates (Figure 5). In comparison to standard  
9  
10 238 antidepressants, St. John's wort showed comparable severity reductions, response, remission, and  
11  
12 239 relapse rates. The quality of the evidence of the meta-analyses of severity and relapse rates had to  
13  
14 240 be downgraded to low and very low, respectively. The evidence of the response and remission rates  
15  
16 241 was considered as moderate quality showing the same results in both German and studies from  
17  
18 242 other countries but containing some RCTs with unclear risk of selection bias and detection bias.  
19  
20 243 Moreover, both meta-analyses<sup>141 149</sup> showed similar AEs of St. John's wort to placebo but significant  
21  
22 244 less AEs than standard antidepressants.  
23  
24

#### 25 245 *Saffron (Crocus sativus)*

26  
27 246 A moderate-quality meta-analysis examined the effectiveness and safety of saffron on depression  
28  
29 247 severity by including 5 RCTs in adult patients with major depression.<sup>146</sup> It revealed very low quality of  
30  
31 248 evidence for significant greater effects versus placebo and similar effects versus antidepressant  
32  
33 249 medication up to 8 weeks of treatment (Figure 2). No serious adverse events were reported, but  
34  
35 250 patients receiving saffron tend to report more adverse events than those receiving placebo and less  
36  
37 251 adverse events than those receiving antidepressant medication. Reasons for downgrading the  
38  
39 252 evidence included no replication of the results (all included RCTs were conducted by the same  
40  
41 253 research group), the small overall sample size, and the possibly high risk of publication bias.  
42  
43  
44  
45  
46  
47

#### 48 254 *Curcumin (Curcuma longa)*

49  
50  
51 255 For the intake of curcumin, a moderate-quality meta-analysis<sup>154</sup> revealed very low quality of evidence  
52  
53 256 suggesting a small but significant short-term effect of low heterogeneity on depression severity by  
54  
55 257 pooling 6 RCTs (Figure 2). No serious adverse events were recorded. Evidence had to be downgraded  
56  
57 258 due to unclear risk of selection, performance, detection, attrition, and reporting bias in over the half  
58  
59  
60

1  
2 259 of the included RCTs, the imprecision of the pooled effect and the possibly high risk of publication  
3  
4 260 bias.

#### 7 261 *Traditional Chinese herbs*

8  
9  
10 262 A comprehensive but low-quality systematic review of 296 RCTs of *Chinese herbal medicine* formulas  
11  
12 263 and single herbs<sup>161</sup> revealed 21 RCTs of mostly unclear to high risk of selection, performance, and  
13  
14 264 detection bias and a serious risk of publication bias. Therefore, the evidence supporting the superiority  
15  
16 265 above placebo and the similarity towards standard antidepressants regarding depression severity  
17  
18 266 (Figure 2) and response rates (Figure 4) was assessed as very low.

#### 21 267 *Other herbs*

22  
23  
24 268 For other than the described herbs, no meta-analyses were conducted to date. However, a  
25  
26 269 systematic review<sup>109</sup> found three single RCTs that showed significant improvement in depressive  
27  
28 270 symptoms for *Lavandula angustifolia* as an adjunctive treatment to standard antidepressant drugs  
29  
30 271 versus antidepressant drugs alone and for *Echium amoenum* and *Rhodiola rosea* versus placebo. No  
31  
32 272 serious adverse events were reported.

#### 35 273 *Homoeopathy*

36  
37  
38  
39 274 No meta-analysis on *homoeopathic remedies* for depression were conducted yet. A recent systematic  
40  
41 275 review detected no placebo-controlled RCTs in patients with a primary diagnosis of depression.<sup>128</sup>

#### 43 276 *Hypnosis*

44  
45  
46  
47 277 No meta-analysis on *hypnosis* or *self-hypnosis* techniques met the inclusion criteria of this overview.  
48  
49 278 The only available review on this topic<sup>126</sup> included 6 RCTs among which only one RCT included adults  
50  
51 279 with mild primary depression. Within the mixed sample of physically ill patients and healthy adults,  
52  
53 280 (self-)hypnosis appeared to be effective in decreasing depressive symptoms.

#### 54 281 *Light therapy*

55  
56  
57  
58 282 A high-quality Cochrane review meta-analysed the effects of *bright light therapy* in adjunction to  
59  
60 283 standard antidepressants versus sham light therapy plus antidepressants on severity and response

1  
2 284 rates in patients suffering from non-seasonal depression.<sup>160</sup> By pooling 18 RCTs of overall unclear risk  
3  
4 285 of bias, it revealed very low quality of evidence for a significant small but inconsistent and imprecise  
5  
6 286 effect on depression severity (Figure 2). A subgroup analysis of two RCTs with low risk of selection  
7  
8 287 bias and detection bias revealed a significant large effect on depression severity but based on one  
9  
10 288 non-peer-reviewed publication and one RCT that also included bipolar patients. Response rates did  
11  
12 289 not significantly differ between groups (Figure 4). Adverse events were reported non-systematically  
13  
14 290 but appeared to be comparable to sham light therapy except for hypomania that occurred more  
15  
16 291 often under verum light therapy.<sup>160</sup>

17  
18  
19  
20 292 For patients with seasonal patterns of depression, a meta-analysis of 8 RCTs<sup>151</sup> revealed very low  
21  
22 293 quality of evidence for a significant medium effect on depression severity of light monotherapy in  
23  
24 294 comparison to sham light therapy (Figure 2). Risk of bias of individual RCTs, heterogeneity, and safety  
25  
26 295 were not analysed leading to an overall low quality of the meta-analysis and downgrading of the  
27  
28 296 evidence.

### 297 **Massage therapy**

298 The literature search detected no meta-analysis of *massage therapy* in patients with a primary  
299 depression. However, massage therapy appeared to be effective in decreasing depressive symptoms  
300 in mixed samples of physically ill patients and healthy adult.<sup>132</sup> Future research will show, whether  
301 these results may be transferable to primary depressed cases.

### 302 **Meditative movement therapies**

#### 303 *Dance therapy*

304 Short-term effects of improvisatory or structured *dance therapy* as a combination of movement-  
305 based work, interactive group components and insight/expressive methods were meta-analysed by a  
306 Cochrane review of high methodological quality.<sup>152</sup> It revealed a significant large pooled effect size  
307 for depression severity as an adjunctive treatment option to standard medical/psychotherapeutic  
308 care based on two RCTs (Figure 2). Although the meta-analyses contained no heterogeneity and no

1  
2 309 imprecise CI, the evidence had to be downgraded because of mostly unclear/high risk of bias of one  
3  
4 310 of the RCTs as well as the overall small sample size.  
5

#### 6 7 311 *Chinese movement therapies* 8

9  
10 312 A low-quality meta-analysis on Chinese meditative movement therapies revealed 30 RCTs, of which 2  
11  
12 313 RCTs on *Qi Gong* and 3 RCTs on *Tai Chi* met inclusion criteria for patients with mild to severe  
13  
14 314 symptoms of primary depression.<sup>150</sup> Very low quality of evidence suggested significant short-term  
15  
16 315 effects for Qi Gong but not for Tai Chi in comparison to TAU. The evidence had to be downgraded  
17  
18 316 due to very serious limitations of the quality of the RCTs and the meta-analysis, significant  
19  
20 317 heterogeneity, imprecision, and a possible high risk of publication bias.  
21  
22

#### 23 24 318 *Yoga* 25

26  
27 319 A high-quality meta-analysis of complex *yoga* interventions for various depressive disorders found 12  
28  
29 320 RCTs,<sup>144</sup> of which 5 RCTs of mostly unclear risk of bias met the inclusion criteria of this overview. The  
30  
31 321 pooled short-term effect on depression severity was of large size in comparison to TAU and medium  
32  
33 322 size in comparison to standard exercises (Figure 2). However, the evidence was assessed as very low  
34  
35 323 due to serious limitations of quality of the RCTs, significant heterogeneity, imprecision, and a possible  
36  
37 324 high risk of publication bias.  
38  
39

40  
41 325 A further systematic review of yoga in major depressive disorder, revealed 5 newer yoga RCTs but did  
42  
43 326 not perform a meta-analysis because of high clinical heterogeneity. Risk of bias was comparably high  
44  
45 327 and evidence mostly conflicting.<sup>106</sup>  
46  
47

#### 48 328 ***Mindfulness-based interventions*** 49

##### 50 51 329 *Mindfulness-based Cognitive Therapy (MBCT)* 52

53  
54 330 A low-quality meta-analysis of mindfulness-based interventions in patients with major depression  
55  
56 331 found 4 RCTs investigating the effects of MBCT and Cognitive Behavioural Therapy (CBT) on depression  
57  
58 332 severity.<sup>158</sup> It revealed a significant large short-term effect of MBCT in comparison to TAU and similar  
59  
60

1  
2 333 effects in comparison to CBT (Figure 2). However, the quality of the evidence was considered as very  
3  
4 334 low due to the missing risk of bias assessment, inconsistency, and imprecision.

5  
6  
7 335 A further moderate-quality systematic review on MBCT meta-analysed 9 RCTs on an individual patient  
8  
9 336 data level.<sup>148</sup> The sample consisted of patients with recurrent major depression currently in remission.  
10  
11 337 After a period of 60 weeks, MBCT showed a significantly reduced risk of depressive relapse compared  
12  
13 338 to those receiving antidepressant drugs (Figure 5). No serious adverse events were reported. The  
14  
15 339 evidence was assessed as moderate due to a possibly serious risk of publication bias.

#### 16 340 *Mindfulness-based stress reduction (MBSR)*

17  
18  
19 341 RCTs of MBSR and MBSR-like interventions were meta-analysed by a recent review <sup>143</sup> showing a  
20  
21 342 significant large short-term effect on depression severity in comparison to TAU and enhanced TAU  
22  
23 343 (Figure 2). The quality of the evidence was assessed as low because of the overall unclear risk of  
24  
25 344 selection and performance bias and significant heterogeneity.

#### 26 345 *Music therapy*

27  
28  
29 346 Studies on active and receptive *music therapy* in older patients with a diagnosis of depression were  
30  
31 347 summarized by a recent moderate-quality meta-analysis.<sup>162</sup> Out of 19 RCTs, 8 met the inclusion  
32  
33 348 criteria for this overview. Pooled analyses of 5 of them revealed a significant medium effect size on  
34  
35 349 depression severity against TAU up to 52 weeks, however with bigger short-term than long-term  
36  
37 350 effects, considerable heterogeneity and overall unclear risk of selection, performance and detection  
38  
39 351 bias resulting in very low quality of evidence. Further 3 RCTs of the same review revealed low quality  
40  
41 352 evidence for a significant large consistent and precise effect of music therapy as an adjunctive  
42  
43 353 treatment to antidepressants (Figure 2).

44  
45  
46 354 A newer Cochrane review<sup>138</sup> found 8 different RCTs showing a significant large pooled effect of music  
47  
48 355 therapy on depression severity against TAU and similar effects as CBT (Figure 2). However, both  
49  
50 356 analyses revealed very low quality of evidence due to mostly unclear selection, performance,  
51  
52 357 detection and reporting bias, significant heterogeneity, and imprecision.

#### 53 358 *Nutrition therapy*

1  
2 359 No meta-analyses on specific diets for patients with depression were published to date. A systematic  
3  
4 360 review of 11 RCTs on whole-diet interventions in mostly healthy patients with subthreshold physical  
5  
6 361 conditions revealed conflicting evidence on the effectiveness of those intervention for the reduction  
7  
8 362 of depressive symptoms.<sup>114</sup>

10  
11 363 A further systematic review on fasting in patients with chronic pain and inflammatory diseases<sup>110</sup>  
12  
13 364 included 1 RCT and 7 observational studies, which showed promising short-term but questionable  
14  
15 365 longer-term anti-depressive effects.

### 18 366 ***Religious/spiritual Interventions***

20  
21 367 Very low to low quality of evidence was found by a moderate-quality systematic review of 9 RCTs on  
22  
23 368 Christian, Muslim, and spiritual CBT adaptations.<sup>140</sup> The analyses showed significant greater medium  
24  
25 369 effects on depression severity against TAU and standard CBT (Figure 2). Safety data were not  
26  
27 370 reported.

### 30 371 ***Supplements***

#### 32 372 *Inositol*

33  
34 373 A low quality meta-analysis of 2 RCTs in patients with major depression<sup>153</sup> revealed very low quality  
35  
36 374 evidence for inositol as adjective to standard antidepressants versus placebo in combination to standard  
37  
38 375 antidepressants (Figure 2).

#### 40 376 *Magnesium*

41  
42 377 No meta-analysis of magnesium supplementation was found. A recent systematic review detected no  
43  
44 378 RCTs in patients with a primary diagnosis of depression<sup>107</sup>.

#### 46 379 *Omega-3 fatty acids*

47  
48 380 A high-quality Cochrane review<sup>142</sup> of 26 RCTs found conflicting evidence of the effectiveness of  
49  
50 381 supplementation with omega-3 fatty acids versus placebo in patients with major depression as  
51  
52 382 depression severity significantly improved while response and remission rates did not so (Figure 2-4).

53  
54 383 One additional RCT with a very low sample size showed similar effects of omega-3 fatty acids on



1  
2 384 severity and response rates in comparison to antidepressant drug treatment (Figure 2 and 4).

3  
4 385 However, all meta-analyses were based on very low quality of evidence because of limitations of the  
5  
6 386 study quality, significant heterogeneity, imprecision and a possibly high risk of publication bias.

7  
8  
9 387 *Probiotics*

10  
11  
12 388 The effectiveness of the supplementation with probiotics on depression severity was analysed by a  
13  
14 389 moderate-quality meta-analysis of 5 RCTs, of which only one RCT with overall low risk of bias was  
15  
16 390 carried out on patients with major depression.<sup>147</sup> The analysis of the RCT revealed a significant  
17  
18 391 medium but imprecise short-term effect in comparison to placebo (Figure 2). This led to overall very  
19  
20 392 low quality of evidence for probiotics supplementation.

21  
22  
23  
24 393 *S-adenosyl methionine (SAME)*

25  
26  
27 394 A high-quality Cochrane review<sup>145</sup> of the effectiveness and safety of SAME supplementation on  
28  
29 395 depression severity revealed 2 RCTs of low risk of bias that showed no significant pooled effects for  
30  
31 396 SAME monotherapy versus placebo. One RCT, also of low risk of bias showed a significant medium  
32  
33 397 short-term effect as adjunctive to standard antidepressant medication, both for depression severity.  
34  
35 398 Further 5 RCTs, which were rated as having overall unclear risk of bias, showed similar pooled effects  
36  
37 399 of SAME monotherapy on depression severity compared to standard antidepressant medication  
38  
39 400 (Figure 2). Original RCTs reported safety issues insufficiently. For all meta-analyses, the evidence was  
40  
41 401 assessed as low to very low quality because of limitations of the study quality, heterogeneity,  
42  
43 402 imprecision, and a possibly high risk of publication bias.

44  
45  
46  
47 403 *Tryptophan*

48  
49  
50 404 A moderate-quality Cochrane review found 2 RCTs investigating the effectiveness and safety of  
51  
52 405 tryptophan supplementation on depression severity.<sup>157</sup> Pooling the effects led to significant greater  
53  
54 406 short-term response rates (Figure 4) as well as significant more adverse events in the tryptophan  
55  
56 407 group than in the placebo group. The evidence was assessed as very low quality because of an  
57  
58 408 unclear risk of detection, attrition and other bias, imprecision, and a possible risk for publication bias.

59  
60  
409 *Vitamins*

1  
2 410 For Vitamin B6, no meta-analysis was available. A systematic review without meta-analysis revealed  
3  
4 411 2 RCTs showing no significant effects when compared to placebo.<sup>119</sup>  
5  
6

7 412 Two further moderate to high-quality meta-analyses examined the effects of vitamin B9 (Folate) for  
8  
9 413 major depressive patients. While a Cochrane review<sup>159</sup> calculated a significant medium effect size of  
10  
11 414 folate-intake as an adjunctive intervention to standard drug treatment on depression severity, a  
12  
13 415 more recent review<sup>139</sup> revealed non-significant differences on severity and response rates (Figure 2  
14  
15 and 3). In contrast, a long-term combined intake of Vitamin B6, B9, and B12 was found to be  
16  
17 416 effective for relapse prevention after remission of symptoms as a result of one RCT (Figure 5).<sup>139</sup>  
18  
19 417 However, all comparisons were based on very low quality of evidence mostly due to significant  
20  
21 418 heterogeneity, imprecision, and possible high risk of publication bias.  
22  
23 419

24  
25 420 Another moderate-quality meta-analysis revealed evidence of the effectiveness of vitamin D-intake  
26  
27 421 on depression severity in comparison to placebo.<sup>156</sup> The analysis of the two included RCTs revealed a  
28  
29 422 significant medium short-term effect in favour of vitamin D in major depressed patients up to 8  
30  
31 423 weeks (Figure 2). The quality of evidence was rated as very low due to limitations of the study  
32  
33 424 quality, missing values of heterogeneity, imprecision, a high risk of publication bias as well as  
34  
35 425 insufficient reporting of adverse events.  
36  
37  
38

#### 39 426 *Zinc*

40  
41  
42 427 The effectiveness of zinc for major depression was meta-analysed by a low-quality review of 3  
43  
44 428 RCTs.<sup>155</sup> It revealed a significant pooled short-term effect of medium size and low heterogeneity  
45  
46 429 when zinc was taken as an adjunctive to standard antidepressant drug treatment (Figure 2).  
47  
48

49 430 However, the available evidence had to be assessed as very low as the meta-analysis did not perform  
50  
51 431 risk of bias assessments and did not report adverse events.  
52  
53

#### 54 55 432 **Discussion**

56  
57 433 This systematic review provided a comprehensive overview of the evidence of CAM treatments for  
58  
59 434 patients with a diagnosis or clinical symptoms of depression. Moderate quality evidence suggested  
60  
435 the efficacy, comparative effectiveness to standard antidepressants, and safety of St. John's wort on

1  
2 436 depression severity and response rates. For remission and relapse rates, the evidence was conflicting  
3  
4 437 and of lower quality. Moreover, moderate quality evidence showed that MBCT was superior to  
5  
6 438 standard antidepressant drug treatment for the prevention of depression relapse in patients with  
7  
8 439 recurrent major depression. Low quality evidence suggested significant greater effects in favour of  
9  
10 440 electroacupuncture in comparison to standard antidepressants alone and in adjunction to standard  
11  
12 441 antidepressants for depression severity. For remission rates, low quality evidence revealed  
13  
14 442 comparable effects of electroacupuncture and standard antidepressants. Further significant greater  
15  
16 443 effects, which based on low quality evidence, were found for MBSR versus TAU, music therapy in  
17  
18 444 adjunction to standard antidepressants, faith-adapted CBT versus CBT, and SAME versus standard  
19  
20 445 antidepressants. Other treatments such as manual acupuncture, aromatherapy, biofeedback, herbs  
21  
22 446 (crocus sativus, curcuma longa, traditional Chinese herbs, lavandula angustifolia, echium amoenum,  
23  
24 447 rhodiola rosea), Homoeopathy, hypnosis, bright light therapy, massage, meditative movement  
25  
26 448 therapies (dance therapy, Qi Gong, Tai Chi, yoga), whole-diet interventions, fasting, and  
27  
28 449 supplementation with inositol, magnesium, omega-3 fatty acids, probiotics, tryptophan, B- and D-  
29  
30 450 vitamins, and zinc were based on very low quality of evidence or no level-1 evidence.  
31  
32  
33  
34  
35  
36 451 The strengths of the review process included the comprehensive literature search based on a  
37  
38 452 structured list of CAM specific topics, which had been operationalized for the Cochrane  
39  
40 453 Collaboration.<sup>41</sup> It therefore included evidence for more than the previously considered CAM  
41  
42 454 approaches and provided systematic information where further high-quality studies are required. In  
43  
44 455 addition, we only included results of RCTs of patients with a diagnosis of depression or clinical  
45  
46 456 relevant depressive symptoms and excluded RCTs on samples with minor or secondary symptoms of  
47  
48 457 depression by newly calculating effect sizes. Finally, we rated AMSTAR and considered the quality of  
49  
50 458 the meta-analyses as well when grading the quality of the evidence.  
51  
52  
53  
54  
55 459 The conclusions derived from this overview are limited due to possibly missing evidence from newer  
56  
57 460 RCTs, which have not been summarized by the included systematic reviews and meta-analyses. As it  
58  
59 461 was not within the scope of this overview, we did not separately search for individual RCTs. We also  
60  
462 did not include meta-analyses on studies of lower evidence levels, which may include bigger samples

1  
2 463 and may provide additional information about further possible treatment approaches. Moreover, we  
3  
4 464 did not search online registries or conference proceedings for unpublished or ongoing meta-analyses,  
5  
6 465 which may limit the conclusions. Another reason that limits the quality of evidence consists in the  
7  
8 466 unsatisfactory methodological quality of some of the included meta-analyses. Although the  
9  
10 467 methodological quality of the original RCTs might be acceptable, the bad reporting of some meta-  
11  
12 468 analyses led to downgraded evidence. In particular, meta-analyses often missed to search for grey  
13  
14 469 literature, cite excluded studies, adequately assess risk of bias of the original studies, and report  
15  
16 470 complete  $I^2$  statistics. As the latter are known to be unstable in meta-analyses with a small numbers  
17  
18 471 of studies,<sup>163</sup> calculating confidence intervals for  $I^2$  should be standard. Moreover, RCTs as well as  
19  
20 472 meta-analyses often missed to systematically report on occurred adverse events, which also limits  
21  
22 473 the significance of the conclusions. In RCTs of non-pharmacological interventions, there is always a  
23  
24 474 high or unclear risk of performance bias and possibly high placebo effects. As such, adding credible  
25  
26 475 sham interventions, controlling for patients' expectancies, and performing of ITT analyses is  
27  
28 476 indispensable. However, meta-analyses mostly did not systematically assess these issues. In meta-  
29  
30 477 analyses of pharmacological interventions, the influence of industrial funding sources was often not  
31  
32 478 adequately analysed. Here, subgroup analyses of studies having received no funding/non-industrial  
33  
34 479 funding versus those having received industrial funding are needed. Results of meta-analyses that  
35  
36 480 missed to report funding issues completely should be interpreted with caution. In general, it should be  
37  
38 481 noticed that all evidence is based on short-term pooled effects, except for meta-analyses of St. John's  
39  
40 482 wort, MBCT, music therapy, and B- and D-vitamins that also provided longer-term follow-up data.  
41  
42 483 Clinical recommendations for patients should follow the country-specific clinical practice guidelines  
43  
44 484 considering the quality of evidence, the accessibility of the treatment, costs, and the preferences of  
45  
46 485 the patients. While the guidelines agree<sup>30 31 33-35 164 165</sup> that clinicians should select between either CBT  
47  
48 486 or second-generation antidepressant drugs for the treatment of major depression, the restricted  
49  
50 487 search strategy of some of the guidelines might limit their recommendations for CAM treatments.  
51  
52 488 For patients who do reject or do not tolerate standard antidepressant drugs, one alternative  
53  
54 489 treatment option may be St. John's wort. It is also recommended by the American Psychiatric  
55  
56  
57  
58  
59  
60

1  
2 490 Association Task Force report<sup>42</sup> and the CANMAT Depression Work Group<sup>32</sup> as being proven  
3  
4 491 sufficiently for the short-term by placebo-controlled and equivalence trials with standard  
5  
6 492 antidepressants for mild to moderate major depression. Particularly for bridging the gap between  
7  
8 493 diagnosis and getting access to psychotherapy and meanwhile reducing/not-worsening depression  
9  
10 494 severity, St. John's wort may be considered as a possibly better tolerated alternative to standard  
11  
12 495 antidepressant drugs.<sup>166</sup> As St. John's wort is accessible without prescription and currently not  
13  
14 496 regulated by the US Food and Drug Administration, we agree with the ACP guidelines<sup>30</sup> that it  
15  
16 497 remains difficult for patients to obtain quality-controlled remedies. Moreover, St. John's wort is  
17  
18 498 associated with numerous herb-to-drug interactions.<sup>167</sup> Therefore, we would recommend clinicians  
19  
20 499 to educate their patients about possible effects, side effects and interactions who in turn should not  
21  
22 500 take St. John's wort without professional advise.<sup>33</sup> Despite those limitations, we would not  
23  
24 501 discourage a general therapeutic attempt with St. John's wort, even if we disagree with the NICE  
25  
26 502 guideline in this point.<sup>34</sup> Clinicians may also inform patients with recurrent major depression  
27  
28 503 currently in remission about the superiority of MBCT in comparison to standard antidepressants for  
29  
30 504 relapse prevention.<sup>31-34</sup> Finally, patients should also be informed that many other CAM treatments  
31  
32 505 might show promising effects but cannot be recommended until further higher-quality studies will  
33  
34 506 confirm their effectiveness and safety.  
35  
36  
37  
38  
39  
40 507 Further research is needed, particularly for interventions that have shown preliminary evidence for  
41  
42 508 reducing secondary symptoms of depression, promising short-term but no longer-term effects, or  
43  
44 509 insufficient evidence due to low methodological quality of the original RCTs and/or the performed  
45  
46 510 meta-analyses. Reporting of clinical trials and meta-analyses should necessarily follow the  
47  
48 511 CONSORT<sup>168</sup> and PRISMA guidelines,<sup>36</sup> respectively, including rigorous documentation and analysis of  
49  
50 512 adverse events. Especially Chinese and Indian trials are still found to be poorly reported and tended  
51  
52 513 to present more positive conclusions than those from western countries.<sup>169 170</sup> Moreover, 7 of the  
53  
54 514 included meta-analyses showed no more than poor methodological quality. All were published in  
55  
56 515 peer-reviewed journals in the past 5 years. One complementary journal is among them, while 6 of  
57  
58 516 the journals are conventional psychiatric journals with impact factors ranging from 2.419 to 4.369.

1  
2 517 Thus, particularly the review process as well as the editorial work need to be improved. Further  
3  
4 518 clinical practice guidelines should extend their search strategies and include standard search terms  
5  
6 519 for CAM. This is also important for CAM therapies that do not show consistent evidence or that are  
7  
8 520 not yet investigated. This information might be equally interesting for physicians as well as for  
9  
10  
11 521 patients to make an informed decision about the treatment for clinical depression.  
12

## 13 14 522 **Conclusion**

15  
16 523 This overview of systematic reviews on CAM treatments for clinical depression aimed to provide a  
17  
18 524 systematic search strategy and evidence base, on which further clinical practice guidelines may build  
19  
20 525 their recommendations. To improve quality of trials and meta-analyses, researchers, reviewers as  
21  
22 526 well as editors are asked to ensure that future articles strictly adhere the CONSORT and PRISMA  
23  
24  
25 527 guidelines.  
26  
27  
28  
29  
30  
31  
32  
33  
34  
35  
36  
37  
38  
39  
40  
41  
42  
43  
44  
45  
46  
47  
48  
49  
50  
51  
52  
53  
54  
55  
56  
57  
58  
59  
60

1  
2 528 **Acknowledgements**  
3

4 529 None.  
5  
6

7 530 **Funding**  
8

9 531 This research received no specific grant from any funding agency in the public, commercial or not-  
10  
11 532 for-profit sectors.  
12  
13

14 533 **Competing interests**  
15

16 534 The authors declare no competing interests. The authors have no financial or non-financial  
17  
18 535 association that might create a conflict of interest regarding the submitted manuscript.  
19  
20

21  
22 536 **Author contribution statement**  
23

24 537 HH was responsible for the conception and design of the study, the collection and analysis of the  
25  
26 538 study data and for drafting the manuscript. DA participated in the analysis of the study data and  
27  
28 539 drafting the manuscript. HC participated in the conception and design of the study and the analysis  
29  
30 540 of the study data, and critically revised the manuscript. GD participated in the conception and design  
31  
32 541 of the study, and critically revised the manuscript. All authors approved the final manuscript.  
33  
34

35  
36 542 **Data Availability**  
37

38  
39 543 All data relevant to the study are included in the article or uploaded as supplementary information.  
40  
41  
42  
43  
44  
45  
46  
47  
48  
49  
50  
51  
52  
53  
54  
55  
56  
57  
58  
59  
60

1  
2 544 **References**  
3  
4

- 5 545 1. Kessler RC, Berglund P, Demler O, et al. The epidemiology of major depressive disorder: results  
6 546 from the National Comorbidity Survey Replication (NCS-R). *Jama* 2003;289(23):3095-105.  
7 547 doi: 10.1001/jama.289.23.3095
- 8 548 2. Moussavi S, Chatterji S, Verdes E, et al. Depression, chronic diseases, and decrements in health:  
9 549 results from the World Health Surveys. *Lancet* 2007;370(9590):851-8. doi: 10.1016/S0140-  
10 550 6736(07)61415-9
- 11 551 3. Rubio JM, Markowitz JC, Alegria A, et al. Epidemiology of chronic and nonchronic major depressive  
12 552 disorder: results from the national epidemiologic survey on alcohol and related conditions.  
13 553 *Depress Anxiety* 2011;28(8):622-31. doi: 10.1002/da.20864
- 14 554 4. American Psychiatric Association. Diagnostic and statistical manual of mental disorders, fifth  
15 555 edition (DSM-5). Arlington: American Psychiatric Publishing 2013.
- 16 556 5. Lai HM, Cleary M, Sitharthan T, et al. Prevalence of comorbid substance use, anxiety and mood  
17 557 disorders in epidemiological surveys, 1990-2014: A systematic review and meta-analysis.  
18 558 *Drug Alcohol Depend* 2015;154:1-13. doi: 10.1016/j.drugalcdep.2015.05.031
- 19 559 6. Herbert J, Lucassen PJ. Depression as a risk factor for Alzheimer's disease: Genes, steroids,  
20 560 cytokines and neurogenesis - What do we need to know? *Front Neuroendocrinol*  
21 561 2016;41:153-71. doi: 10.1016/j.yfrne.2015.12.001
- 22 562 7. Riccelli R, Passamonti L, Cerasa A, et al. Individual differences in depression are associated with  
23 563 abnormal function of the limbic system in multiple sclerosis patients. *Mult Scler*  
24 564 2016;22(8):1094-105. doi: 10.1177/1352458515606987
- 25 565 8. Azar M, Pruessner M, Baer LH, et al. A study on negative and depressive symptom prevalence in  
26 566 individuals at ultra-high risk for psychosis. *Early Interv Psychiatry* 2016 doi:  
27 567 10.1111/eip.12386
- 28 568 9. Chechko N, Kellermann T, Augustin M, et al. Disorder-specific characteristics of borderline  
29 569 personality disorder with co-occurring depression and its comparison with major depression:  
30 570 An fMRI study with emotional interference task. *Neuroimage Clin* 2016;12:517-25. doi:  
31 571 10.1016/j.nicl.2016.08.015
- 32 572 10. Chen MH, Pan TL, Hsu JW, et al. Attention-deficit hyperactivity disorder comorbidity and  
33 573 antidepressant resistance among patients with major depression: A nationwide longitudinal  
34 574 study. *Eur Neuropsychopharmacol* 2016;26(11):1760-67. doi:  
35 575 10.1016/j.euroneuro.2016.09.369
- 36 576 11. Ronconi JM, Shiner B, Watts BV. A Meta-Analysis of Depressive Symptom Outcomes in  
37 577 Randomized, Controlled Trials for PTSD. *J Nerv Ment Dis* 2015;203(7):522-9. doi:  
38 578 10.1097/NMD.0000000000000322
- 39 579 12. Global Burden of Disease Study Collaborators. Global, regional, and national incidence,  
40 580 prevalence, and years lived with disability for 301 acute and chronic diseases and injuries in  
41 581 188 countries, 1990-2013: a systematic analysis for the Global Burden of Disease Study 2013.  
42 582 *Lancet* 2015;386(9995):743-800. doi: 10.1016/S0140-6736(15)60692-4
- 43 583 13. Cuijpers P, van Straten A, Andersson G, et al. Psychotherapy for depression in adults: a meta-  
44 584 analysis of comparative outcome studies. *J Consult Clin Psychol* 2008;76(6):909-22. doi:  
45 585 10.1037/a0013075
- 46 586 14. Gartlehner G, Wagner G, Matyas N, et al. Pharmacological and non-pharmacological treatments  
47 587 for major depressive disorder: review of systematic reviews. *BMJ Open* 2017;7(6):e014912.  
48 588 doi: 10.1136/bmjopen-2016-014912
- 49 589 15. Cipriani A, Furukawa TA, Salanti G, et al. Comparative efficacy and acceptability of 21  
50 590 antidepressant drugs for the acute treatment of adults with major depressive disorder: a  
51 591 systematic review and network meta-analysis. *The Lancet* 2018;391(10128):1357-66. doi:  
52 592 10.1016/S0140-6736(17)32802-7
- 53 593 16. Mathew SJ, Charney DS. Publication bias and the efficacy of antidepressants. *Am J Psychiatry*  
54 594 2009;166(2):140-5. doi: 10.1176/appi.ajp.2008.08071102
- 55 595 17. Pigott HE, Leventhal AM, Alter GS, et al. Efficacy and effectiveness of antidepressants: current  
56 596 status of research. *Psychother Psychosom* 2010;79(5):267-79. doi: 10.1159/000318293



- 1  
2 597 18. Rief W, Nestoriuc Y, Weiss S, et al. Meta-analysis of the placebo response in antidepressant trials.  
3 598 *J Affect Disord* 2009;118(1-3):1-8. doi: 10.1016/j.jad.2009.01.029
- 4 599 19. Turner EH, Matthews AM, Linardatos E, et al. Selective publication of antidepressant trials and its  
5 600 influence on apparent efficacy. *N Engl J Med* 2008;358(3):252-60. doi:  
6 601 10.1056/NEJMs065779
- 7 602 20. Forneris CA, Nussbaumer B, Kaminski-Hartenthaler A, et al. Psychological therapies for preventing  
8 603 seasonal affective disorder. *Cochrane Database Syst Rev* 2015(11):CD011270. doi:  
9 604 10.1002/14651858.CD011270.pub2
- 10 605 21. Gartlehner G, Nussbaumer B, Gaynes BN, et al. Second-generation antidepressants for preventing  
11 606 seasonal affective disorder in adults. *Cochrane Database Syst Rev* 2015(11):CD011268. doi:  
12 607 10.1002/14651858.CD011268.pub2
- 13 608 22. Kirsch I, Deacon BJ, Huedo-Medina TB, et al. Initial severity and antidepressant benefits: a meta-  
14 609 analysis of data submitted to the Food and Drug Administration. *PLoS Med* 2008;5(2):e45.  
15 610 doi: 10.1371/journal.pmed.0050045
- 16 611 23. Costanian C, Christensen RAG, Edgell H, et al. Factors associated with complementary and  
17 612 alternative medicine use among women at midlife. *Climacteric* 2017;20(5):421-26. doi:  
18 613 10.1080/13697137.2017.1346072
- 19 614 24. Henson JB, Brown CL, Chow S-C, et al. Complementary and Alternative Medicine Use in United  
20 615 States Adults With Liver Disease. *J Clin Gastroenterol* 2017;51(6):564-70. doi:  
21 616 10.1097/mcg.0000000000000617
- 22 617 25. Rhee TG, Westberg SM, Harris IM. Complementary and Alternative Medicine in U.S. Adults with  
23 618 Diabetes: Reasons for Use and Perceived Benefits. *J Diabetes* 2017 doi: 10.1111/1753-  
24 619 0407.12607
- 25 620 26. Zhang Y, Dennis JA, Leach MJ, et al. Complementary and Alternative Medicine Use Among US  
26 621 Adults With Headache or Migraine: Results from the 2012 National Health Interview Survey.  
27 622 *Headache* 2017;57(8):1228-42. doi: 10.1111/head.13148
- 28 623 27. Bahall M. Prevalence, patterns, and perceived value of complementary and alternative medicine  
29 624 among cancer patients: a cross-sectional, descriptive study. *BMC Complement Altern Med*  
30 625 2017;17(1):345. doi: 10.1186/s12906-017-1853-6
- 31 626 28. Luberto CM, White C, Sears RW, et al. Integrative medicine for treating depression: an update on  
32 627 the latest evidence. *Curr Psychiatry Rep* 2013;15(9):391. doi: 10.1007/s11920-013-0391-2
- 33 628 29. Ravindran AV, da Silva TL. Complementary and alternative therapies as add-on to  
34 629 pharmacotherapy for mood and anxiety disorders: a systematic review. *J Affect Disord*  
35 630 2013;150(3):707-19. doi: 10.1016/j.jad.2013.05.042
- 36 631 30. Qaseem A, Barry MJ, Kansagara D. Nonpharmacologic Versus Pharmacologic Treatment of Adult  
37 632 Patients With Major Depressive Disorder: A Clinical Practice Guideline From the American  
38 633 College of Physicians. *Ann Intern Med* 2016;164(5):350-9. doi: 10.7326/m15-2570
- 39 634 31. APA. Practice guideline for the treatment of patients with major depressive disorder.  
40 635 Washington, DC: American Psychiatric Association 2010.
- 41 636 32. Ravindran AV, Balneaves LG, Faulkner G, et al. Canadian Network for Mood and Anxiety  
42 637 Treatments (CANMAT) 2016 Clinical Guidelines for the Management of Adults with Major  
43 638 Depressive Disorder: Section 5. Complementary and Alternative Medicine Treatments. *Can J*  
44 639 *Psychiatry* 2016;61(9):576-87. doi: 10.1177/0706743716660290
- 45 640 33. DGPPN, BÄK, KBV, et al. Clinical practice guideline for unipolar depression [S3-Leitlinie/Nationale  
46 641 VersorgungsLeitlinie Unipolare Depression – Langfassung, 2. Auflage. Version 5] 2015  
47 642 [Available from: [http://www.awmf.org/uploads/tx\\_szleitlinien/nvl-](http://www.awmf.org/uploads/tx_szleitlinien/nvl-005l_S3_Unipolare_Depression_2017-05.pdf)  
48 643 [005l\\_S3\\_Unipolare\\_Depression\\_2017-05.pdf](http://www.awmf.org/uploads/tx_szleitlinien/nvl-005l_S3_Unipolare_Depression_2017-05.pdf).  
49 644
- 50 644 34. National Collaborating Centre for Mental Health. Depression: The Treatment and Management of  
51 645 Depression in Adults (Updated Edition). Leicester and London UK: The British Psychological  
52 646 Society & The Royal College of Psychiatrists 2010.
- 53 647 35. Bauer M, Pfennig A, Severus E, et al. World Federation of Societies of Biological Psychiatry  
54 648 (WFSBP) guidelines for biological treatment of unipolar depressive disorders, part 1: update  
55 649 2013 on the acute and continuation treatment of unipolar depressive disorders. *World J Biol*  
56 650 *Psychiatry* 2013;14(5):334-85. doi: 10.3109/15622975.2013.804195

- 1  
2 651 36. Moher D, Liberati A, Tetzlaff J, et al. Preferred reporting items for systematic reviews and meta-  
3 652 analyses: the PRISMA statement. *BMJ* 2009;339:b2535. doi: 10.1136/bmj.b2535
- 4 653 37. Panic N, Leoncini E, de Belvis G, et al. Evaluation of the endorsement of the preferred reporting  
5 654 items for systematic reviews and meta-analysis (PRISMA) statement on the quality of  
6 655 published systematic review and meta-analyses. *PLoS One* 2013;8(12):e83138. doi:  
7 656 10.1371/journal.pone.0083138
- 8 657 38. Higgins JPT, Green S. Cochrane Handbook for systematic reviews of interventions Version 5.1.0:  
9 658 The Cochrane Collaboration; . 2011. <http://handbook.cochrane.org>.
- 10 659 39. National Center for Complementary and Integrative Health. Complementary, Alternative, or  
11 660 Integrative Health: What's In a Name? 2016 [Available from:  
12 661 <https://nccih.nih.gov/health/integrative-health> accessed 24.07.2017.
- 13 662 40. Keller MB. Remission versus response: the new gold standard of antidepressant care. *J Clin*  
14 663 *Psychiatry* 2004;65 Suppl 4:53-9.
- 15 664 41. Wieland LS, Manheimer E, Berman BM. Development and classification of an operational  
16 665 definition of complementary and alternative medicine for the Cochrane collaboration. *Altern*  
17 666 *Ther Health Med* 2011;17(2):50-9.
- 18 667 42. Freeman MP, Mischoulon D, Tedeschini E, et al. Complementary and alternative medicine for  
19 668 major depressive disorder: a meta-analysis of patient characteristics, placebo-response rates,  
20 669 and treatment outcomes relative to standard antidepressants. *J Clin Psychiatry*  
21 670 2010;71(6):682-8. doi: 10.4088/JCP.10r05976blu
- 22 671 43. Muin M, Fontelo P, Ackerman M. PubMed Informer: monitoring MEDLINE/PubMed through e-  
23 672 mail alerts, SMS, PDA downloads and RSS feeds. *AMIA Annu Symp Proc* 2005:1057.
- 24 673 44. Shea BJ, Grimshaw JM, Wells GA, et al. Development of AMSTAR: a measurement tool to assess  
25 674 the methodological quality of systematic reviews. *BMC Med Res Methodol* 2007;7:10. doi:  
26 675 10.1186/1471-2288-7-10
- 27 676 45. Shea BJ, Hamel C, Wells GA, et al. AMSTAR is a reliable and valid measurement tool to assess the  
28 677 methodological quality of systematic reviews. *J Clin Epidemiol* 2009;62(10):1013-20. doi:  
29 678 10.1016/j.jclinepi.2008.10.009
- 30 679 46. Cohen J. Statistical power analysis for the behavioral sciences. Hillsdale: Lawrence Erlbaum  
31 680 Associates 1988.
- 32 681 47. National Institute for Clinical Excellence. Depression: management of depression in primary and  
33 682 secondary care. Clinical practice guideline No 23. London: National Institute for Clinical  
34 683 Excellence 2004. 670 p.:670.
- 35 684 48. Brozek JL, Akl EA, Alonso-Coello P, et al. Grading quality of evidence and strength of  
36 685 recommendations in clinical practice guidelines. Part 1 of 3. An overview of the GRADE  
37 686 approach and grading quality of evidence about interventions. *Allergy* 2009;64(5):669-77.  
38 687 doi: 10.1111/j.1398-9995.2009.01973.x [published Online First: 2009/02/13]
- 39 688 49. Stub T, Alræk T, Liu J. Acupuncture treatment for depression—A systematic review and meta-  
40 689 analysis. *European Journal of Integrative Medicine* 2011;3(4):e259-e70. doi:  
41 690 <https://doi.org/10.1016/j.eujim.2011.09.003>
- 42 691 50. Smith CA, Armour M, Lee MS, et al. Acupuncture for depression. *Cochrane Database Syst Rev*  
43 692 2018;3:CD004046. doi: 10.1002/14651858.CD004046.pub4
- 44 693 51. Al-Karawi D, Al Mamoori DA, Tayyar Y. The Role of Curcumin Administration in Patients with  
45 694 Major Depressive Disorder: Mini Meta-Analysis of Clinical Trials. *Phytother Res*  
46 695 2016;30(2):175-83. doi: 10.1002/ptr.5524
- 47 696 52. Appleton KM, Rogers PJ, Ness AR. Updated systematic review and meta-analysis of the effects of  
48 697 n-3 long-chain polyunsaturated fatty acids on depressed mood. *Am J Clin Nutr*  
49 698 2010;91(3):757-70. doi: 10.3945/ajcn.2009.28313
- 50 699 53. Appleton KM, Sallis HM, Perry R, et al. omega-3 Fatty acids for major depressive disorder in  
51 700 adults: an abridged Cochrane review. *BMJ Open* 2016;6(3):e010172. doi: 10.1136/bmjopen-  
52 701 2015-010172
- 53 702 54. Asher GN, Gartlehner G, Gaynes BN, et al. Comparative Benefits and Harms of Complementary  
54 703 and Alternative Medicine Therapies for Initial Treatment of Major Depressive Disorder:  
55 704 Systematic Review and Meta-Analysis. *J Altern Complement Med* 2017 doi:  
56 705 10.1089/acm.2016.0261

- 1  
2 706 55. Bloch MH, Hannestad J. Omega-3 fatty acids for the treatment of depression: systematic review  
3 707 and meta-analysis. *Mol Psychiatry* 2012;17(12):1272-82. doi: 10.1038/mp.2011.100  
4 708 56. Cabral P, Meyer HB, Ames D. Effectiveness of yoga therapy as a complementary treatment for  
5 709 major psychiatric disorders: a meta-analysis. *Prim Care Companion CNS Disord*  
6 710 2011;13(4):PCC.10r01068. doi: 10.4088/PCC.10r01068  
7 711 57. Chi I, Jordan-Marsh M, Guo M, et al. Tai chi and reduction of depressive symptoms for older  
8 712 adults: a meta-analysis of randomized trials. *Geriatr Gerontol Int* 2013;13(1):3-12. doi:  
9 713 10.1111/j.1447-0594.2012.00882.x  
10 714 58. Clarke K, Mayo-Wilson E, Kenny J, et al. Can non-pharmacological interventions prevent relapse in  
11 715 adults who have recovered from depression? A systematic review and meta-analysis of  
12 716 randomised controlled trials. *Clin Psychol Rev* 2015;39:58-70. doi: 10.1016/j.cpr.2015.04.002  
13 717 59. Cui YH, Zheng Y. A meta-analysis on the efficacy and safety of St John's wort extract in depression  
14 718 therapy in comparison with selective serotonin reuptake inhibitors in adults. *Neuropsychiatr*  
15 719 *Dis Treat* 2016;12:1715-23. doi: 10.2147/ndt.s106752  
16 720 60. Galante J, Iribarren SJ, Pearce PF. Effects of mindfulness-based cognitive therapy on mental  
17 721 disorders: a systematic review and meta-analysis of randomised controlled trials. *J Res Nurs*  
18 722 2013;18(2):133-55. doi: 10.1177/1744987112466087  
19 723 61. Golden RN, Gaynes BN, Ekstrom RD, et al. The efficacy of light therapy in the treatment of mood  
20 724 disorders: a review and meta-analysis of the evidence. *Am J Psychiatry* 2005;162(4):656-62.  
21 725 doi: 10.1176/appi.ajp.162.4.656  
22 726 62. Gowda U, Mutowo MP, Smith BJ, et al. Vitamin D supplementation to reduce depression in  
23 727 adults: meta-analysis of randomized controlled trials. *Nutrition* 2015;31(3):421-9. doi:  
24 728 10.1016/j.nut.2014.06.017  
25 729 63. Goyal M, Singh S, Sibinga EM, et al. Meditation programs for psychological stress and well-being:  
26 730 a systematic review and meta-analysis. *JAMA Intern Med* 2014;174(3):357-68. doi:  
27 731 10.1001/jamainternmed.2013.13018  
28 732 64. Hofmann SG, Sawyer AT, Witt AA, et al. The effect of mindfulness-based therapy on anxiety and  
29 733 depression: A meta-analytic review. *J Consult Clin Psychol* 2010;78(2):169-83. doi:  
30 734 10.1037/a0018555  
31 735 65. Jorm AF, Christensen H, Griffiths KM, et al. Effectiveness of complementary and self-help  
32 736 treatments for depression. *Med J Aust* 2002;176 Suppl:S84-96.  
33 737 66. Kim HL, Streltzer J, Goebert D. St. John's wort for depression: a meta-analysis of well-defined  
34 738 clinical trials. *J Nerv Ment Dis* 1999;187(9):532-8.  
35 739 67. Klainin-Yobas P, Oo WN, Suzanne Yew PY, et al. Effects of relaxation interventions on depression  
36 740 and anxiety among older adults: a systematic review. *Aging Ment Health* 2015;19(12):1043-  
37 741 55. doi: 10.1080/13607863.2014.997191  
38 742 68. Kou MJ, Chen JX. Integrated traditional and Western medicine for treatment of depression based  
39 743 on syndrome differentiation: a meta-analysis of randomized controlled trials based on the  
40 744 Hamilton depression scale. *J Tradit Chin Med* 2012;32(1):1-5.  
41 745 69. Kraguljac NV, Montori VM, Pavuluri M, et al. Efficacy of omega-3 fatty acids in mood disorders - a  
42 746 systematic review and metaanalysis. *Psychopharmacol Bull* 2009;42(3):39-54.  
43 747 70. Lai J, Moxey A, Nowak G, et al. The efficacy of zinc supplementation in depression: systematic  
44 748 review of randomised controlled trials. *J Affect Disord* 2012;136(1-2):e31-e39. doi:  
45 749 10.1016/j.jad.2011.06.022  
46 750 71. Li G, Mbuagbaw L, Samaan Z, et al. Efficacy of vitamin D supplementation in depression in adults:  
47 751 a systematic review. *J Clin Endocrinol Metab* 2014;99(3):757-67. doi: 10.1210/jc.2013-3450  
48 752 72. Lin PY, Su KP. A meta-analytic review of double-blind, placebo-controlled trials of antidepressant  
49 753 efficacy of omega-3 fatty acids. *J Clin Psychiatry* 2007;68(7):1056-61.  
50 754 73. Linde K, Berner M, Egger M, et al. St John's wort for depression: meta-analysis of randomised  
51 755 controlled trials. *Br J Psychiatry* 2005;186:99-107. doi: 10.1192/bjp.186.2.99  
52 756 74. Linde K, Mulrow CD, Berner M, et al. St John's wort for depression. *Cochrane Database Syst Rev*  
53 757 2005(2):CD000448. doi: 10.1002/14651858.CD000448.pub2  
54 758 75. Man C, Li C, Gong D, et al. Meta-analysis of Chinese herbal Xiaoyao formula as an adjuvant  
55 759 treatment in relieving depression in Chinese patients. *Complement Ther Med*  
56 760 2014;22(2):362-70. doi: 10.1016/j.ctim.2014.02.001

- 1  
2 761 76. Martins JG. EPA but not DHA appears to be responsible for the efficacy of omega-3 long chain  
3 762 polyunsaturated fatty acid supplementation in depression: evidence from a meta-analysis of  
4 763 randomized controlled trials. *J Am Coll Nutr* 2009;28(5):525-42.
- 5 764 77. Mocking RJ, Harmsen I, Assies J, et al. Meta-analysis and meta-regression of omega-3  
6 765 polyunsaturated fatty acid supplementation for major depressive disorder. *Transl Psychiatry*  
7 766 2016;6:e756. doi: 10.1038/tp.2016.29
- 8 767 78. Moyer CA, Rounds J, Hannum JW. A meta-analysis of massage therapy research. *Psychol Bull*  
9 768 2004;130(1):3-18. doi: 10.1037/0033-2909.130.1.3
- 10 769 79. Nussbaumer B, Kaminski-Hartenthaler A, Forneris Catherine A, et al. Light therapy for preventing  
11 770 seasonal affective disorder. *Cochrane Database Syst Rev* 2015(11):CD011269. doi:  
12 771 10.1002/14651858.CD011269.pub2
- 13 772 80. Piet J, Hougaard E. The effect of mindfulness-based cognitive therapy for prevention of relapse in  
14 773 recurrent major depressive disorder: a systematic review and meta-analysis. *Clin Psychol Rev*  
15 774 2011;31(6):1032-40. doi: 10.1016/j.cpr.2011.05.002
- 16 775 81. Qin F, Wu XA, Tang Y, et al. Meta-analysis of randomized controlled trials to assess the  
17 776 effectiveness and safety of Free and Easy Wanderer Plus, a polyherbal preparation for  
18 777 depressive disorders. *J Psychiatr Res* 2011;45(11):1518-24. doi:  
19 778 10.1016/j.jpsychires.2011.06.018
- 20 779 82. Rahimi R, Nikfar S, Abdollahi M. Efficacy and tolerability of *Hypericum perforatum* in major  
21 780 depressive disorder in comparison with selective serotonin reuptake inhibitors: a meta-  
22 781 analysis. *Prog Neuropsychopharmacol Biol Psychiatry* 2009;33(1):118-27. doi:  
23 782 10.1016/j.pnpbp.2008.10.018
- 24 783 83. Ren Y, Zhu C, Wu J, et al. Comparison between herbal medicine and fluoxetine for depression: a  
25 784 systematic review of randomized controlled trials. *Complement Ther Med* 2015;23(5):674-84.  
26 785 doi: 10.1016/j.ctim.2015.07.002
- 27 786 84. Roder C, Schaefer M, Leucht S. [Meta-analysis of effectiveness and tolerability of treatment of  
28 787 mild to moderate depression with *St. John's Wort*]. *Fortschr Neurol Psychiatr* 2004;72(6):330-  
29 788 43. doi: 10.1055/s-2003-812513
- 30 789 85. Sarris J, Murphy J, Mischoulon D, et al. Adjunctive Nutraceuticals for Depression: A Systematic  
31 790 Review and Meta-Analyses. *Am J Psychiatry* 2016;173(6):575-87. doi:  
32 791 10.1176/appi.ajp.2016.15091228
- 33 792 86. Sarris J, Panossian A, Schweitzer I, et al. Herbal medicine for depression, anxiety and insomnia: a  
34 793 review of psychopharmacology and clinical evidence. *Eur Neuropsychopharmacol*  
35 794 2011;21(12):841-60. doi: 10.1016/j.euroneuro.2011.04.002
- 36 795 87. Smith CA, Hay PP. Acupuncture for depression. *Cochrane Database Syst Rev* 2005(2):CD004046.  
37 796 doi: 10.1002/14651858.CD004046.pub2
- 38 797 88. Sublette ME, Ellis SP, Geant AL, et al. Meta-analysis of the effects of eicosapentaenoic acid (EPA)  
39 798 in clinical trials in depression. *J Clin Psychiatry* 2011;72(12):1577-84. doi:  
40 799 10.4088/JCP.10m06634
- 41 800 89. Taylor MJ, Carney SM, Goodwin GM, et al. Folate for depressive disorders: systematic review and  
42 801 meta-analysis of randomized controlled trials. *J Psychopharmacol* 2004;18(2):251-6. doi:  
43 802 10.1177/0269881104042630
- 44 803 90. Wang C, Bannuru R, Ramel J, et al. Tai Chi on psychological well-being: systematic review and  
45 804 meta-analysis. *BMC Complement Altern Med* 2010;10:23. doi: 10.1186/1472-6882-10-23
- 46 805 91. Wang F, Lee EK, Wu T, et al. The effects of tai chi on depression, anxiety, and psychological well-  
47 806 being: a systematic review and meta-analysis. *Int J Behav Med* 2014;21(4):605-17. doi:  
48 807 10.1007/s12529-013-9351-9
- 49 808 92. Wang H, Qi H, Wang BS, et al. Is acupuncture beneficial in depression: a meta-analysis of 8  
50 809 randomized controlled trials? *J Affect Disord* 2008;111(2-3):125-34. doi:  
51 810 10.1016/j.jad.2008.04.020
- 52 811 93. Wang Y, Fan R, Huang X. Meta-analysis of the clinical effectiveness of traditional Chinese  
53 812 medicine formula Chaihu-Shugan-San in depression. *J Ethnopharmacol* 2012;141(2):571-7.  
54 813 doi: 10.1016/j.jep.2011.08.079

- 1  
2 814 94. Wang YY, Li XH, Zheng W, et al. Mindfulness-based interventions for major depressive disorder: A  
3 815 comprehensive meta-analysis of randomized controlled trials. *J Affect Disord* 2018;229:429-  
4 816 36. doi: 10.1016/j.jad.2017.12.093
- 5 817 95. Whiskey E, Werneke U, Taylor D. A systematic review and meta-analysis of Hypericum  
6 818 perforatum in depression: a comprehensive clinical review. *Int Clin Psychopharmacol*  
7 819 2001;16(5):239-52.
- 8 820 96. Yeung WF, Chung KF, Ng KY, et al. A meta-analysis of the efficacy and safety of traditional Chinese  
9 821 medicine formula Ganmai Dazao decoction for depression. *J Ethnopharmacol*  
10 822 2014;153(2):309-17. doi: 10.1016/j.jep.2014.02.046
- 11 823 97. Yin J, Dishman RK. The effect of Tai Chi and Qigong practice on depression and anxiety symptoms:  
12 824 A systematic review and meta-regression analysis of randomized controlled trials. *Ment*  
13 825 *Health Phys Act* 2014;7(3):135-46.
- 14 826 98. Zhang X, Kang D, Zhang L, et al. Shuganjieyu capsule for major depressive disorder (MDD) in  
15 827 adults: a systematic review. *Aging Ment Health* 2014;18(8):941-53. doi:  
16 828 10.1080/13607863.2014.899975
- 17 829 99. Zheng W, Zhang YF, Zhong HQ, et al. Wuling Capsule for Major Depressive Disorder: A Meta-  
18 830 analysis of Randomised Controlled Trials. *East Asian Arch Psychiatry* 2016;26(3):87-97.
- 19 831 100. Ng QX, Venkatanarayanan N, Ho CYX. Clinical use of Hypericum perforatum (St John's wort) in  
20 832 depression: A meta-analysis. *J Affect Disord* 2017;210:211-21.
- 21 833 101. Chan YY, Lo WY, Yang SN, et al. The benefit of combined acupuncture and antidepressant  
22 834 medication for depression: A systematic review and meta-analysis. *J Affect Disord*  
23 835 2015;176:106-17. doi: 10.1016/j.jad.2015.01.048 [published Online First: 2015/02/24]
- 24 836 102. Smith CA, Hay PP, Macpherson H. Acupuncture for depression. *Cochrane Database Syst Rev*  
25 837 2010(1):CD004046. doi: 10.1002/14651858.CD004046.pub3
- 26 838 103. Zhang Y, Qu SS, Zhang JP, et al. Rapid Onset of the Effects of Combined Selective Serotonin  
27 839 Reuptake Inhibitors and Electroacupuncture on Primary Depression: A Meta-Analysis. *J Altern*  
28 840 *Complement Med* 2016;22(1):1-8. doi: 10.1089/acm.2015.0114
- 29 841 104. Zhang ZJ, Chen HY, Yip KC, et al. The effectiveness and safety of acupuncture therapy in  
30 842 depressive disorders: systematic review and meta-analysis. *J Affect Disord* 2010;124(1-2):9-  
31 843 21. doi: 10.1016/j.jad.2009.07.005
- 32 844 105. Coelho HF, Boddy K, Ernst E. Massage therapy for the treatment of depression: a systematic  
33 845 review. *Int J Clin Pract* 2008;62(2):325-33. doi: 10.1111/j.1742-1241.2007.01553.x
- 34 846 106. Cramer H, Anheyer D, Lauche R, et al. A systematic review of yoga for major depressive disorder.  
35 847 *J Affect Disord* 2017;213:70-77. doi: 10.1016/j.jad.2017.02.006
- 36 848 107. Derom ML, Sayon-Orea C, Martinez-Ortega JM, et al. Magnesium and depression: a systematic  
37 849 review. *Nutr Neurosci* 2013;16(5):191-206. doi: 10.1179/1476830512y.0000000044
- 38 850 108. Dolle K, Schulte-Korne G. [Complementary treatment methods for depression in children and  
39 851 adolescents]. *Prax Kinderpsychol Kinderpsychiatr* 2014;63(3):237-63.
- 40 852 109. Dwyer AV, Whitten DL, Hawrelak JA. Herbal medicines, other than St. John's Wort, in the  
41 853 treatment of depression: a systematic review. *Altern Med Rev* 2011;16(1):40-9.
- 42 854 110. Fond G, Macgregor A, Leboyer M, et al. Fasting in mood disorders: neurobiology and  
43 855 effectiveness. A review of the literature. *Psychiatry Res* 2013;209(3):253-8. doi:  
44 856 10.1016/j.psychres.2012.12.018
- 45 857 111. Hausenblas HA, Heekin K, Mutchie HL, et al. A systematic review of randomized controlled trials  
46 858 examining the effectiveness of saffron (*Crocus sativus* L.) on psychological and behavioral  
47 859 outcomes. *J Integr Med* 2015;13(4):231-40. doi: 10.1016/s2095-4964(15)60176-5
- 48 860 112. Jorm AF, Allen NB, O'Donnell CP, et al. Effectiveness of complementary and self-help treatments  
49 861 for depression in children and adolescents. *Med J Aust* 2006;185(7):368-72.
- 50 862 113. Maratos AS, Gold C, Wang X, et al. Music therapy for depression. *Cochrane Database Syst Rev*  
51 863 2008(1):CD004517. doi: 10.1002/14651858.CD004517.pub2
- 52 864 114. Opie RS, O'Neil A, Itsiopoulos C, et al. The impact of whole-of-diet interventions on depression  
53 865 and anxiety: a systematic review of randomised controlled trials. *Public Health Nutr*  
54 866 2015;18(11):2074-93. doi: 10.1017/s1368980014002614
- 55 867 115. Pilkington K, Kirkwood G, Rampes H, et al. Homeopathy for depression: a systematic review of  
56 868 the research evidence. *Homeopathy* 2005;94(3):153-63.

- 1  
2 869 116. Sanchez-Vidana DI, Ngai SP, He W, et al. The Effectiveness of Aromatherapy for Depressive  
3 870 Symptoms: A Systematic Review. *Evid Based Complement Alternat Med* 2017;2017:5869315.  
4 871 doi: 10.1155/2017/5869315
- 5 872 117. Schoenberg PL, David AS. Biofeedback for psychiatric disorders: a systematic review. *Appl*  
6 873 *Psychophysiol Biofeedback* 2014;39(2):109-35. doi: 10.1007/s10484-014-9246-9
- 7 874 118. Tsang HW, Chan EP, Cheung WM. Effects of mindful and non-mindful exercises on people with  
8 875 depression: a systematic review. *Br J Clin Psychol* 2008;47(Pt 3):303-22. doi:  
9 876 10.1348/014466508x279260
- 10 877 119. Williams AL, Cotter A, Sabina A, et al. The role for vitamin B-6 as treatment for depression: a  
11 878 systematic review. *Fam Pract* 2005;22(5):532-7. doi: 10.1093/fampra/cmi040
- 12 879 120. Al-Karawi D, Jubair L. Bright light therapy for nonseasonal depression: Meta-analysis of clinical  
13 880 trials. *J Affect Disord* 2016;198:64-71. doi: 10.1016/j.jad.2016.03.016
- 14 881 121. Grosso G, Pajak A, Marventano S, et al. Role of omega-3 fatty acids in the treatment of  
15 882 depressive disorders: a comprehensive meta-analysis of randomized clinical trials. *PLoS One*  
16 883 2014;9(5):e96905. doi: 10.1371/journal.pone.0096905
- 17 884 122. Hallahan B, Ryan T, Hibbeln JR, et al. Efficacy of omega-3 highly unsaturated fatty acids in the  
18 885 treatment of depression. *Br J Psychiatry* 2016;209(3):192-201. doi:  
19 886 10.1192/bjp.bp.114.160242
- 20 887 123. Ng QX, Peters C, Ho CYX, et al. A meta-analysis of the use of probiotics to alleviate depressive  
21 888 symptoms. *J Affect Disord* 2017;228:13-19. doi: 10.1016/j.jad.2017.11.063
- 22 889 124. Penders TM, Stanciu CN, Schoemann AM, et al. Bright Light Therapy as Augmentation of  
23 890 Pharmacotherapy for Treatment of Depression: A Systematic Review and Meta-Analysis.  
24 891 *Prim Care Companion CNS Disord* 2016;18(5) doi: 10.4088/PCC.15r01906
- 25 892 125. Perera S, Eisen R, Bhatt M, et al. Light therapy for non-seasonal depression: systematic review  
26 893 and meta-analysis. *BJPsych Open* 2016;2(2):116-26. doi: 10.1192/bjpo.bp.115.001610
- 27 894 126. Shih M, Yang YH, Koo M. A meta-analysis of hypnosis in the treatment of depressive symptoms:  
28 895 a brief communication. *Int J Clin Exp Hypn* 2009;57(4):431-42. doi:  
29 896 10.1080/00207140903099039
- 30 897 127. Spedding S. Vitamin D and depression: a systematic review and meta-analysis comparing studies  
31 898 with and without biological flaws. *Nutrients* 2014;6(4):1501-18. doi: 10.3390/nu6041501
- 32 899 128. Davidson JR, Crawford C, Ives JA, et al. Homeopathic treatments in psychiatry: A systematic  
33 900 review of randomized placebo-controlled studies. *J Clin Psychiatry* 2011;72(6):795-805.
- 34 901 129. Ernst E. Bach flower remedies: a systematic review of randomised clinical trials. *Swiss Med Wkly*  
35 902 2010;140:w13079. doi: 10.4414/smw.2010.13079
- 36 903 130. Galante J, Galante I, Bekkers MJ, et al. Effect of kindness-based meditation on health and well-  
37 904 being: a systematic review and meta-analysis. *J Consult Clin Psychol* 2014;82(6):1101-14. doi:  
38 905 10.1037/a0037249
- 39 906 131. Goncalves JP, Lucchetti G, Menezes PR, et al. Religious and spiritual interventions in mental  
40 907 health care: a systematic review and meta-analysis of randomized controlled clinical trials.  
41 908 *Psychol Med* 2015;45(14):2937-49. doi: 10.1017/s0033291715001166
- 42 909 132. Hou WH, Chiang PT, Hsu TY, et al. Treatment effects of massage therapy in depressed people: a  
43 910 meta-analysis. *J Clin Psychiatry* 2010;71(7):894-901. doi: 10.4088/JCP.09r05009blu
- 44 911 133. Joyce J, Herbison GP. Reiki for depression and anxiety. *Cochrane Database Syst Rev*  
45 912 2015(4):CD006833. doi: 10.1002/14651858.CD006833.pub2
- 46 913 134. Blanck P, Perleth S, Heidenreich T, et al. Effects of mindfulness exercises as stand-alone  
47 914 intervention on symptoms of anxiety and depression: Systematic review and meta-analysis.  
48 915 *Behav Res Ther* 2017;102:25-35. doi: 10.1016/j.brat.2017.12.002
- 49 916 135. Jun JH, Choi TY, Lee JA, et al. Herbal medicine (Gan Mai Da Zao decoction) for depression: a  
50 917 systematic review and meta-analysis of randomized controlled trials. *Maturitas*  
51 918 2014;79(4):370-80. doi: 10.1016/j.maturitas.2014.08.008
- 52 919 136. Lee TM, Chan CC. Dose-response relationship of phototherapy for seasonal affective disorder: a  
53 920 meta-analysis. *Acta Psychiatr Scand* 1999;99(5):315-23.
- 54 921 137. Nelms JA, Castel L. A Systematic Review and Meta-Analysis of Randomized and Nonrandomized  
55 922 Trials of Clinical Emotional Freedom Techniques (EFT) for the Treatment of Depression.  
56 923 *Explore (NY)* 2016;12(6):416-26. doi: 10.1016/j.explore.2016.08.001

- 1  
2 924 138. Aalbers S, Fusar-Poli L, Freeman RE, et al. Music therapy for depression. *Cochrane Database of*  
3 925 *Systematic Reviews* 2017(11):CD004517. doi: 10.1002/14651858.CD004517.pub3  
4 926 139. Almeida OP, Ford AH, Flicker L. Systematic review and meta-analysis of randomized placebo-  
5 927 controlled trials of folate and vitamin B12 for depression. *Int Psychogeriatr* 2015;27(5):727-  
6 928 37. doi: 10.1017/s1041610215000046  
7 929 140. Anderson N, Heywood-Everett S, Siddiqi N, et al. Faith-adapted psychological therapies for  
8 930 depression and anxiety: Systematic review and meta-analysis. *J Affect Disord* 2015;176:183-  
9 931 96. doi: 10.1016/j.jad.2015.01.019  
10 932 141. Apaydin EA, Maher AR, Shanman R, et al. A systematic review of St. John's wort for major  
11 933 depressive disorder. *Syst Rev* 2016;5(1):148. doi: 10.1186/s13643-016-0325-2  
12 934 142. Appleton KM, Sallis HM, Perry R, et al. Omega-3 fatty acids for depression in adults. *Cochrane*  
13 935 *Database Syst Rev* 2015(11):CD004692. doi: 10.1002/14651858.CD004692.pub4  
14 936 143. Bo A, Mao W, Lindsey MA. Effects of mind-body interventions on depressive symptoms among  
15 937 older chinese adults: A systematic review and meta-analysis. *Int J Geriatr Psychiatry*  
16 938 2017;32(5):509-21. doi: 10.1002/gps.4688  
17 939 144. Cramer H, Lauche R, Langhorst J, et al. Yoga for depression: a systematic review and meta-  
18 940 analysis. *Depress Anxiety* 2013;30(11):1068-83. doi: 10.1002/da.22166  
19 941 145. Galizia I, Oldani L, Macritchie K, et al. S-adenosyl methionine (SAMe) for depression in adults.  
20 942 *Cochrane Database Syst Rev* 2016(10):CD011286. doi: 10.1002/14651858.CD011286.pub2  
21 943 146. Hausenblas HA, Saha D, Dubyak PJ, et al. Saffron (*Crocus sativus* L.) and major depressive  
22 944 disorder: a meta-analysis of randomized clinical trials. *J Integr Med* 2013;11(6):377-83. doi:  
23 945 10.3736/jintegrmed2013056  
24 946 147. Huang R, Wang K, Hu J. Effect of Probiotics on Depression: A Systematic Review and Meta-  
25 947 Analysis of Randomized Controlled Trials. *Nutrients* 2016;8(8) doi: 10.3390/nu8080483  
26 948 148. Kuyken W, Warren FC, Taylor RS, et al. Efficacy of Mindfulness-Based Cognitive Therapy in  
27 949 Prevention of Depressive Relapse: An Individual Patient Data Meta-analysis From  
28 950 Randomized Trials. *JAMA Psychiatry* 2016;73(6):565-74. doi:  
29 951 10.1001/jamapsychiatry.2016.0076  
30 952 149. Linde K, Berner MM, Kriston L. St John's wort for major depression. *Cochrane Database Syst Rev*  
31 953 2008;8(4):CD000448.  
32 954 150. Liu X, Clark J, Siskind D, et al. A systematic review and meta-analysis of the effects of Qigong and  
33 955 Tai Chi for depressive symptoms. *Complement Ther Med* 2015;23(4):516-34. doi:  
34 956 10.1016/j.ctim.2015.05.001  
35 957 151. Martensson B, Pettersson A, Berglund L, et al. Bright white light therapy in depression: A critical  
36 958 review of the evidence. *J Affect Disord* 2015;182:1-7. doi: 10.1016/j.jad.2015.04.013  
37 959 152. Meekums B, Karkou V, Nelson EA. Dance movement therapy for depression. *Cochrane Database*  
38 960 *Syst Rev* 2015(2):CD009895. doi: 10.1002/14651858.CD009895.pub2  
39 961 153. Mukai T, Kishi T, Matsuda Y, et al. A meta-analysis of inositol for depression and anxiety  
40 962 disorders. *Hum Psychopharmacol* 2014;29(1):55-63. doi: 10.1002/hup.2369  
41 963 154. Ng QX, Koh SSH, Chan HW, et al. Clinical Use of Curcumin in Depression: A Meta-Analysis. *J Am*  
42 964 *Med Dir Assoc* 2017;18(6):503-08. doi: 10.1016/j.jamda.2016.12.071  
43 965 155. Scheffert C, Kilarski LL, Bschor T, et al. Efficacy of adding nutritional supplements in unipolar  
44 966 depression: A systematic review and meta-analysis. *Eur Neuropsychopharmacol*  
45 967 2017;27(11):1090-109. doi: 10.1016/j.euroneuro.2017.07.004  
46 968 156. Shaffer JA, Edmondson D, Wasson LT, et al. Vitamin D supplementation for depressive  
47 969 symptoms: a systematic review and meta-analysis of randomized controlled trials.  
48 970 *Psychosom Med* 2014;76(3):190-6. doi: 10.1097/psy.0000000000000044  
49 971 157. Shaw KA, Turner J, Del Mar C. Tryptophan and 5-Hydroxytryptophan for depression. *Cochrane*  
50 972 *Database of Systematic Reviews* 2002(1):CD003198. doi: 10.1002/14651858.CD003198  
51 973 158. Strauss C, Cavanagh K, Oliver A, et al. Mindfulness-based interventions for people diagnosed  
52 974 with a current episode of an anxiety or depressive disorder: a meta-analysis of randomised  
53 975 controlled trials. *PLoS One* 2014;9(4):e96110. doi: 10.1371/journal.pone.0096110  
54 976 159. Taylor MJ, Carney S, Geddes J, et al. Folate for depressive disorders. *Cochrane Database Syst Rev*  
55 977 2003(2):CD003390. doi: 10.1002/14651858.cd003390

- 1  
2 978 160. Tuunainen A, Kripke DF, Endo T. Light therapy for non-seasonal depression. *Cochrane Database*  
3 979 *Syst Rev* 2004(2):CD004050. doi: 10.1002/14651858.CD004050.pub2  
4 980 161. Yeung WF, Chung KF, Ng KY, et al. A systematic review on the efficacy, safety and types of  
5 981 Chinese herbal medicine for depression. *J Psychiatr Res* 2014;57:165-75. doi:  
6 982 10.1016/j.jpsychires.2014.05.016  
7 983 162. Zhao K, Bai Z, Bo A, et al. A systematic review and meta-analysis of music therapy for the older  
8 984 adults with depression. *Int J Geriatr Psychiatry* 2016;31(11):1188-98.  
9 985 163. von Hippel PT. The heterogeneity statistic  $I^2$  can be biased in small meta-analyses. *BMC Med Res*  
10 986 *Methodol* 2015;15(1):35. doi: 10.1186/s12874-015-0024-z  
11 987 164. Parikh SV, Quilty LC, Ravitz P, et al. Canadian Network for Mood and Anxiety Treatments  
12 988 (CANMAT) 2016 Clinical Guidelines for the Management of Adults with Major Depressive  
13 989 Disorder: Section 2. Psychological Treatments. *Can J Psychiatry* 2016;61(9):524-39. doi:  
14 990 10.1177/0706743716659418  
15 991 165. Kennedy SH, Lam RW, McIntyre RS, et al. Canadian Network for Mood and Anxiety Treatments  
16 992 (CANMAT) 2016 Clinical Guidelines for the Management of Adults with Major Depressive  
17 993 Disorder: Section 3. Pharmacological Treatments. *Can J Psychiatry* 2016;61(9):540-60. doi:  
18 994 10.1177/0706743716659417  
19 995 166. Fava GA, Gatti A, Belaise C, et al. Withdrawal Symptoms after Selective Serotonin Reuptake  
20 996 Inhibitor Discontinuation: A Systematic Review. *Psychother Psychosom* 2015;84(2):72-81. doi:  
21 997 10.1159/000370338  
22 998 167. Mills E, Montori VM, Wu P, et al. Interaction of St John's wort with conventional drugs:  
23 999 systematic review of clinical trials. *BMJ* 2004;329(7456):27-30. doi: 10.1136/bmj.329.7456.27  
24 1000 168. Schulz KF, Altman DG, Moher D, et al. CONSORT 2010 statement: updated guidelines for  
25 1001 reporting parallel group randomised trials. *BMJ* 2010;340:c332. doi: 10.1136/bmj.c332  
26 1002 169. Cramer H, Lauche R, Langhorst J, et al. Are Indian yoga trials more likely to be positive than  
27 1003 those from other countries? A systematic review of randomized controlled trials. *Contemp*  
28 1004 *Clin Trials* 2015;41:269-72. doi: 10.1016/j.cct.2015.02.005  
29 1005 170. Ma B, Chen ZM, Xu JK, et al. Do the CONSORT and STRICTA Checklists Improve the Reporting  
30 1006 Quality of Acupuncture and Moxibustion Randomized Controlled Trials Published in Chinese  
31 1007 Journals? A Systematic Review and Analysis of Trends. *PLoS One* 2016;11(1):e0147244. doi:  
32 1008 10.1371/journal.pone.0147244  
33  
34  
35  
36  
37  
38  
39  
40  
41  
42  
43  
44  
45  
46  
47  
48  
49  
50  
51  
52  
53  
54  
55  
56  
57  
58  
59  
60



1  
2 **Figure legends**  
3

4  
5 **Figure 1. Study flow diagram.**  
6

7  
8 **Figure 2. Quality of evidence for depression severity.** ADM: Antidepressant medication, CBT:  
9  
10 Cognitive Behavioural Therapy, CI: Confidence Interval, I<sup>2</sup>: Heterogeneity, MBCT: Mindfulness-based  
11  
12 Cognitive Therapy, MBSR: Mindfulness-based Stress Reduction, N.c.: Not calculable because of only  
13  
14 one included RCT, N.r.: Not reported, S-adenosyl methionine, Tau: Treatment as Usual  
15  
16

17  
18 **Figure 3. Quality of evidence for depression remission rates.** ADM: Antidepressant medication, CI:  
19  
20 Confidence Interval, I<sup>2</sup>: Heterogeneity, N.c.: Not calculable because of only one included RCT, OR:  
21  
22 Odds Ratio, RR: Risk Ratio, Tau: Treatment as Usual  
23  
24

25  
26 **Figure 4. Quality of evidence for depression response rates.** ADM: Antidepressant medication, CI:  
27  
28 Confidence Interval, I<sup>2</sup>: Heterogeneity, N.c.: Not calculable because of only one included RCT, OR:  
29  
30 Odds Ratio, RR: Risk Ratio  
31

32  
33 **Figure 5. Quality of evidence for depression relapse rates.** ADM: Antidepressant medication, CI:  
34  
35 Confidence Interval, HR: Hazard Ratio, I<sup>2</sup>: Heterogeneity, MBCT: Mindfulness-based Cognitive  
36  
37 Therapy, N.c.: Not calculable because of only one included RCT, OR: Odds Ratio, RR: Risk Ratio, Tau:  
38  
39 Treatment as Usual  
40  
41  
42  
43  
44  
45  
46  
47  
48  
49  
50  
51  
52  
53  
54  
55  
56  
57  
58  
59  
60

## Tables

**Table 1. Electronic search strategy for PubMed.**

|    |                                                                                                                                                                                                                                                                                                                                                                                                                                                                                                                                                                                                                                                                                                                                                                                                                                                                                                                                                                                                                                                                                                                                                                                                                                                                                                                                                                                                                               |
|----|-------------------------------------------------------------------------------------------------------------------------------------------------------------------------------------------------------------------------------------------------------------------------------------------------------------------------------------------------------------------------------------------------------------------------------------------------------------------------------------------------------------------------------------------------------------------------------------------------------------------------------------------------------------------------------------------------------------------------------------------------------------------------------------------------------------------------------------------------------------------------------------------------------------------------------------------------------------------------------------------------------------------------------------------------------------------------------------------------------------------------------------------------------------------------------------------------------------------------------------------------------------------------------------------------------------------------------------------------------------------------------------------------------------------------------|
| #1 | (Depression OR Depressive Disorder, Major OR Depressive Disorder, Treatment-Resistant OR Dysthymic Disorder OR Seasonal Affective Disorder)[mh]                                                                                                                                                                                                                                                                                                                                                                                                                                                                                                                                                                                                                                                                                                                                                                                                                                                                                                                                                                                                                                                                                                                                                                                                                                                                               |
| #2 | (depress* OR dysthym* or “seasonal affective” OR “affective disorder” OR “affective disorders” OR “mood disorder” OR “mood disorders”)[tiab]                                                                                                                                                                                                                                                                                                                                                                                                                                                                                                                                                                                                                                                                                                                                                                                                                                                                                                                                                                                                                                                                                                                                                                                                                                                                                  |
| #3 | (Systematic review OR Meta-analysis)[pt] OR (Systematic* OR Meta-analy*)[tiab]                                                                                                                                                                                                                                                                                                                                                                                                                                                                                                                                                                                                                                                                                                                                                                                                                                                                                                                                                                                                                                                                                                                                                                                                                                                                                                                                                |
| #4 | (Acupressure OR Acupuncture OR acid OR Alexander Technique OR alternative OR Aromatherapy OR Aroma Therapy OR Art Therap* OR ayurved* OR Balneotherapy OR Balneo Therapy OR bee OR Biofeedback OR Bio Feedback OR bright light OR Chelation Therapy OR Chinese Traditional Medicine OR Chiropractic OR Chronotherapy OR Color Therapy OR complementary OR craniosacral OR cupping OR Curcumin OR Dance Therapy OR diet OR Distant Healing OR Electroacupuncture OR Feldenkrais OR folic acid OR Folate OR Healing Touch OR herbal OR Herbs OR Homeopath* OR Honey OR Hydrotherapy OR hyperbaric oxygenation OR Hypericum perforatum OR Hyperthermia OR Hypnosis OR Imagery OR Inositol OR Kampo OR Light Therapy OR Magnesium OR Massage OR MBSR OR MBCT OR Meditation OR Mindfulness OR Morita Therapy OR Moxibustion OR Mediterranean OR Music Therap* OR Naturopathy OR Neural Therapy OR Omega-3 OR Osteopath* OR Ozone Therapy OR Phototherapy OR Pollen OR Prayer OR prebiotic* OR probiotic* OR Propolis OR Qi Gong OR Reflexology OR Reiki OR Relaxation OR Rolfing OR Royal Jelly OR S-adenosyl-L-methionine OR Saffron OR Shamanism OR Snoezelen OR Speleotherapy OR Spinal Manipulation OR Spiritual OR St John's Wort OR Supplements OR Tai Chi OR TCM OR Therapeutic Touch OR Traditional Chinese Medicine OR Tryptophan OR Tui na OR Turmeric OR vegan OR vegetarian OR venom OR Vitamin OR Yoga OR zinc)[tiab] |
| #5 | (Acupressure OR Acupuncture OR Acupuncture Therapy OR Acids OR Aromatherapy OR Art Therapy OR Balneology OR Biofeedback, Psychology OR Chelation Therapy OR Chiropractic OR Chronotherapy OR Color Therapy OR Complementary Therapies OR Crocus OR Curcuma OR Dance Therapy OR Diet OR Electroacupuncture OR Fatty Acids, Omega-3 OR Folic Acid OR Homeopathy OR Honey OR Hydrotherapy OR Hypericum OR Hyperthermia, Induced OR Hypnosis OR Imagery OR Inositol OR Magnesium OR Manipulation, Spinal OR Massage OR Medicine, Ayurvedic OR Medicine, Chinese Traditional OR Medicine, Kampo OR Meditation OR Mind-Body Therapies OR Mindfulness OR Moxibustion OR Naturopathy OR Ozone OR Phototherapy OR Plants, Medicinal OR Pollen OR Prebiotics OR Probiotics OR Propolis OR Qigong OR Relaxation OR Shamanism OR Speleotherapy OR Spiritual Therapies OR Supplements, Dietary OR Tai Ji OR Therapeutic Touch OR Tryptophan OR Venoms OR Vitamins OR Yoga OR Zinc)[mh]                                                                                                                                                                                                                                                                                                                                                                                                                                                     |
| #6 | (#1 OR #2) AND #3 AND (#4 OR #5)                                                                                                                                                                                                                                                                                                                                                                                                                                                                                                                                                                                                                                                                                                                                                                                                                                                                                                                                                                                                                                                                                                                                                                                                                                                                                                                                                                                              |

1  
2  
3  
4  
5  
6  
7  
8  
9  
10  
11  
12  
13  
14  
15  
16  
17  
18  
19  
20  
21  
22  
23  
24  
25  
26  
27  
28  
29  
30  
31  
32  
33  
34  
35  
36  
37  
38  
39  
40  
41  
42  
43  
44  
45  
46  
47  
48  
49  
50  
51  
52  
53  
54  
55  
56  
57  
58  
59  
60

**Supplementary data**

**Supplementary table 1:** Detailed AMSTAR ratings.

**Supplementary table 2:** Characteristics and outcomes of the included meta-analyses.

For peer review only

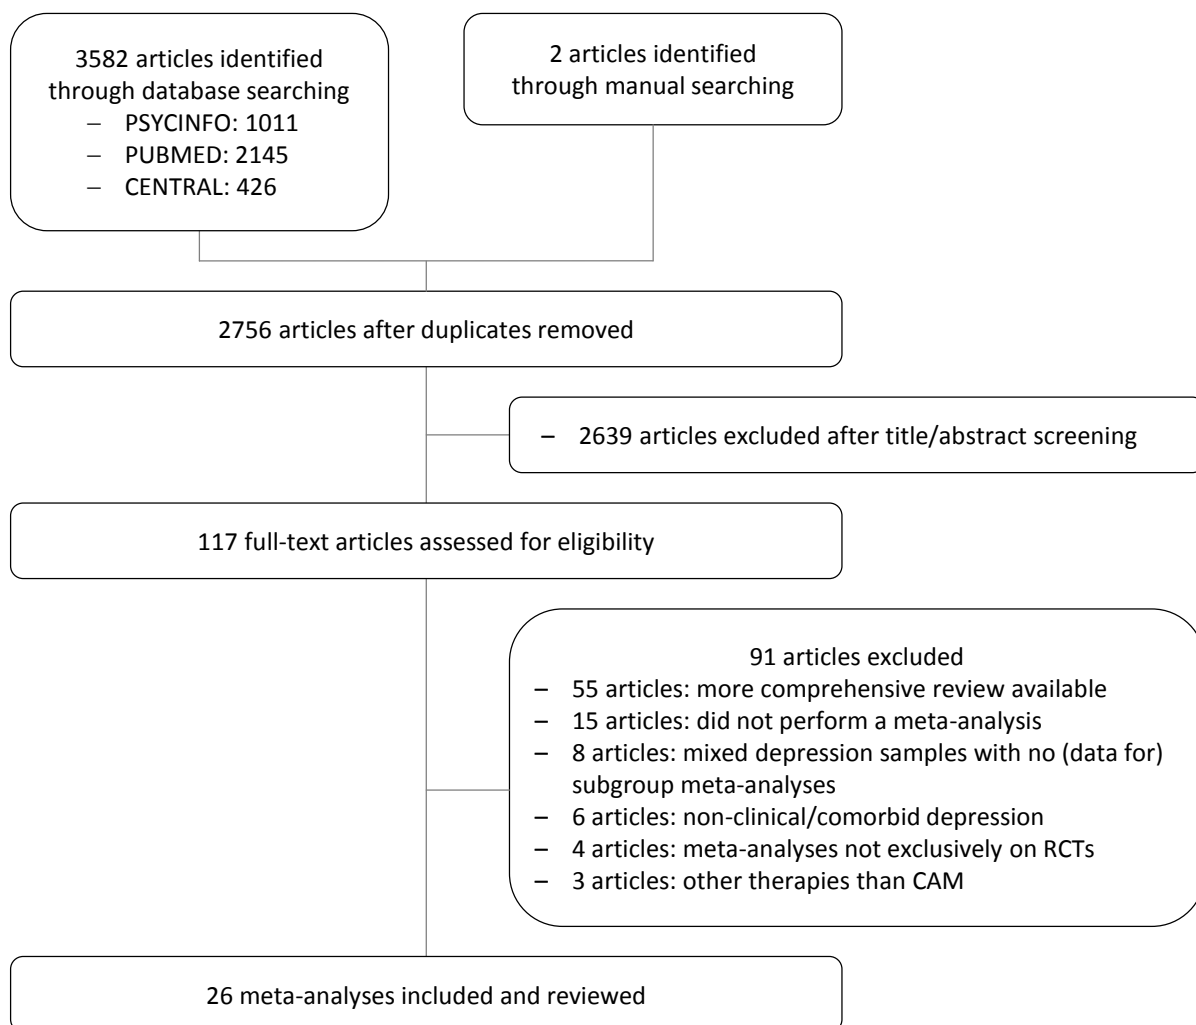

| Quality of evidence | Intervention       | Control       | Reference        | Trials | Parti-<br>pants | I <sup>2</sup>       | Std. Mean Difference<br>95% CI | Std. Mean Difference<br>95% CI |
|---------------------|--------------------|---------------|------------------|--------|-----------------|----------------------|--------------------------------|--------------------------------|
| <b>Moderate</b>     | St. John's Wort    | Placebo       | Apaydin, 2016    | 16     | 2888            | 89%                  | -0.49 [-0.74, -0.23]           |                                |
| <b>Low</b>          | Electroacupuncture | ADM           | Smith, 2018      | 10     | 995             | 33%                  | -0.28 [-0.47, -0.09]           |                                |
|                     |                    | Adjunctive    | Smith, 2018      | 5      | 274             | 33%                  | -0.84 [-1.16, -0.51]           |                                |
|                     | St. John's Wort    | ADM           | Apaydin, 2016    | 14     | 2248            | 74%                  | -0.03 [-0.21, 0.15]            |                                |
|                     | Dance therapy      | Adjunctive    | Meekums, 2015    | 2      | 107             | 0%                   | -1.06 [-1.46, -0.65]           |                                |
|                     | MBSR               | TAU           | Bo, 2017         | 5      | 396             | 56%                  | -1.09 [-1.41, -0.76]           |                                |
|                     | Music therapy      | Adjunctive    | Zhao, 2016       | 3      | 257             | 0%                   | -0.88 [-1.07, -0.68]           |                                |
|                     | Faith-adapted CBT  | CBT           | Anderson, 2015   | 6      | 199             | 0%                   | -0.54 [-0.82, -0.25]           |                                |
|                     | SAMe               | ADM           | Galizia, 2016    | 5      | 821             | 43%                  | -0.01 [-0.22, 0.21]            |                                |
| <b>Very low</b>     | Manual acupuncture | TAU           | Smith, 2018      | 4      | 458             | 62%                  | -0.56 [-0.98, -0.15]           |                                |
|                     |                    | Sham          | Smith, 2018      | 7      | 418             | 80%                  | -0.43 [-0.95, 0.08]            |                                |
|                     |                    | ADM           | Smith, 2018      | 19     | 1967            | 87%                  | -0.24 [-0.51, 0.02]            |                                |
|                     | Electroacupuncture | Adjunctive    | Smith, 2018      | 8      | 539             | 93%                  | -1.32 [-2.09, -0.55]           |                                |
|                     |                    | TAU           | Smith, 2018      | 1      | 30              | n.c.                 | -1.26 [-2.10, -0.43]           |                                |
|                     | Saffron            | Sham          | Smith, 2018      | 5      | 251             | 0%                   | 0.12 [-0.14, 0.38]             |                                |
|                     |                    | Placebo       | Hausenblas, 2013 | 2      | 71              | 0%                   | -1.62 [-2.14, -1.10]           |                                |
|                     | Curcuma            | ADM           | Hausenblas, 2013 | 3      | 106             | 0%                   | -0.15 [-0.52, 0.22]            |                                |
|                     |                    | Placebo       | Ng, 2017         | 6      | 377             | 0%                   | -0.34 [-0.56, -0.13]           |                                |
|                     | Chinese herbs      | Placebo       | Yeung, 2014      | 4      | 251             | 44%                  | -1.27 [-1.67, -0.87]           |                                |
|                     |                    | ADM           | Yeung, 2014      | 9      | 1962            | 82%                  | 0.17 [-0.12, 0.46]             |                                |
|                     | Light therapy      | Sham          | Martensson, 2015 | 8      | 179             | n.r.                 | -0.54 [-0.95, -0.13]           |                                |
|                     |                    | Adjunctive    | Tuunainen, 2004  | 9      | 505             | 60%                  | -0.20 [-0.38, -0.01]           |                                |
|                     | Qi Gong            | TAU           | Liu, 2015        | 2      | 120             | 74%                  | -1.27 [-2.09, -0.45]           |                                |
|                     | Thai Chi           | TAU           | Liu, 2015        | 3      | 120             | 78%                  | -0.61 [-1.55, 0.34]            |                                |
|                     | Yoga               | TAU           | Cramer, 2013     | 4      | 141             | 82%                  | -1.03 [-1.90, -0.16]           |                                |
|                     |                    | MBCT          | Strauss, 2014    | 3      | 115             | 72%                  | -0.97 [-1.81, -0.12]           |                                |
|                     | Music therapy      | CBT           | Strauss, 2014    | 1      | 45              | n.c.                 | -0.16 [-0.75, 0.43]            |                                |
|                     |                    | TAU           | Zhao, 2016       | 5      | 244             | 76%                  | -0.57 [-1.03, -0.11]           |                                |
|                     |                    | TAU           | Aalbers, 2017    | 4      | 219             | 83%                  | -0.98 [-1.69, -0.27]           |                                |
|                     | Faith-adapted CBT  | CBT           | Aalbers, 2017    | 4      | 131             | 96%                  | -1.28 [-3.57, 1.02]            |                                |
|                     |                    | TAU           | Anderson, 2015   | 6      | 304             | 82%                  | -0.69 [-1.21, -0.17]           |                                |
|                     | Inositol           | Adjunctive    | Mukai, 2014      | 2      | 78              | 0%                   | 0.17 [-0.33, 0.66]             |                                |
|                     | Omega-3            | Placebo       | Appleton, 2015   | 25     | 1373            | 59%                  | -0.30 [-0.50, -0.10]           |                                |
|                     |                    | ADM           | Appleton, 2015   | 1      | 40              | n.c.                 | -0.08 [-0.70, 0.54]            |                                |
|                     | Probiotics         | Placebo       | Huang, 2016      | 1      | 40              | n.c.                 | -0.73 [-1.37, -0.09]           |                                |
|                     | SAMe               | Placebo       | Galizia, 2016    | 2      | 142             | 72%                  | -0.54 [-1.54, 0.46]            |                                |
|                     |                    | Adjunctive    | Galizia, 2016    | 1      | 73              | n.c.                 | -0.59 [-1.06, -0.12]           |                                |
| Folate              | Adjunctive         | Taylor, 2003  | 2                | 124    | 0%              | -0.40 [-0.76, -0.05] |                                |                                |
| Vitamin D           | Placebo            | Almeida, 2015 | 5                | 505    | 66%             | -0.12 [-0.45, 0.22]  |                                |                                |
|                     | Adjunctive         | Shaffer, 2014 | 2                | 149    | n.r.            | -0.60 [-1.19, -0.01] |                                |                                |
| Zinc                | Adjunctive         | Schefft, 2017 | 3                | 104    | 0%              | -0.66 [-1.06, -0.26] |                                |                                |

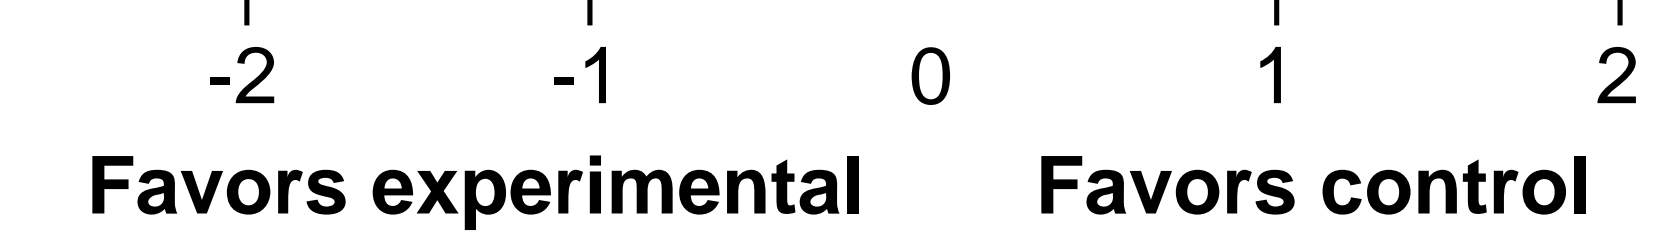

| Quality of evidence | Intervention       | Control    | Reference      | Trials | Partici- pants | I <sup>2</sup> | Risk/Odds Ratio 95% CI | Risk/Odds Ratio 95% CI |
|---------------------|--------------------|------------|----------------|--------|----------------|----------------|------------------------|------------------------|
| <b>Moderate</b>     | St. John's Wort    | ADM        | Apaydin, 2016  | 7      | 787            | 29%            | RR: 1.17 [0.84, 1.62]  |                        |
| <b>Low</b>          | Manual acupuncture | ADM        | Smith, 2018    | 19     | 1967           | 87%            | RR: 1.21 [1.06, 1.39]  |                        |
|                     | Electroacupuncture | ADM        | Smith, 2018    | 8      | 966            | 0%             | RR: 1.01 [0.92, 1.11]  |                        |
| <b>Very low</b>     | Manual acupuncture | TAU        | Smith, 2018    | 4      | 458            | 62%            | RR: 1.67 [0.77, 3.65]  |                        |
|                     |                    | Sham       | Smith, 2018    | 7      | 418            | 80%            | RR: 1.89 [0.75, 4.75]  |                        |
|                     |                    | Adjunctive | Smith, 2018    | 8      | 539            | 93%            | RR: 1.33 [0.65, 2.73]  |                        |
|                     | Electroacupuncture | Sham       | Smith, 2018    | 2      | 87             | 20%            | RR: 1.23 [0.35, 4.29]  |                        |
|                     |                    | Adjunctive | Smith, 2018    | 5      | 273            | 49%            | RR: 1.17 [0.75, 1.80]  |                        |
|                     | St. John's Wort    | Placebo    | Apaydin, 2016  | 9      | 1419           | 94%            | RR: 1.69 [0.63, 4.55]  |                        |
|                     | Omega-3            | ADM        | Appleton, 2015 | 6      | 426            | 7%             | OR: 1.38 [0.87, 2.20]  |                        |

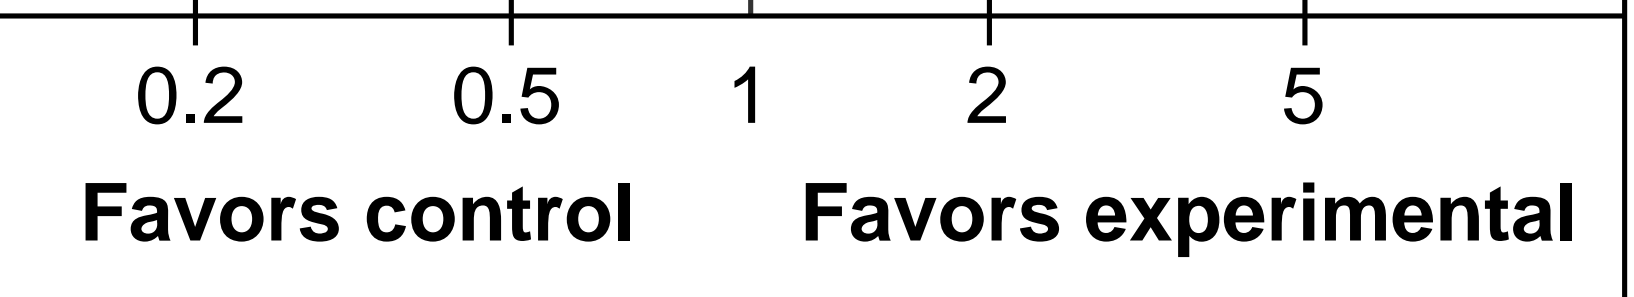

| Quality of-evidence | Intervention    | Control    | Reference      | Trials  | Partici-pants         | I <sup>2</sup> | Risk/Odds Ratio 95% CI | Risk/Odds Ratio 95% CI |
|---------------------|-----------------|------------|----------------|---------|-----------------------|----------------|------------------------|------------------------|
| <b>Moderate</b>     | St. John's Wort | Placebo    | Linde, 2008    | 18      | 3064                  | 75%            | RR: 1.48 [1.23, 1.77]  |                        |
|                     |                 |            | Apaydin, 2016  | 18      | 2922                  | 79%            | RR: 1.53 [1.19, 1.97]  |                        |
|                     | St. John's Wort | ADM        | Linde, 2008    | 17      | 2810                  | 17%            | RR: 1.01 [0.93, 1.09]  |                        |
|                     |                 |            | Apaydin, 2016  | 17      | 2776                  | 52%            | RR: 1.01 [0.90, 1.14]  |                        |
| <b>Very Low</b>     | Light therapy   | Adjunctive | Tuuainen, 2004 | 3       | 71                    | 69%            | RR: 0.94 [0.61, 1.46]  |                        |
|                     |                 |            | Chinese herbs  | Placebo | Yeung, 2014           | 3              | 281                    | 0%                     |
|                     | Omega-3         | ADM        | Yeung, 2014    |         | 10                    | 1653           | 42%                    | RR: 1.00 [0.94, 1.07]  |
|                     |                 |            | Tryptophan     | Placebo | Appleton, 2015        | 15             | 611                    | 6%                     |
|                     | Folate          | Adjunctive |                |         | Appleton, 2015        | 1              | 40                     | n.c.                   |
|                     |                 |            | Shaw, 2002     | 2       | 46                    | 0%             | OR: 4.10 [1.28, 13.15] |                        |
|                     | Almeida, 2015   | 4          | 478            | 73%     | OR: 1.18 [0.49, 2.83] |                |                        |                        |

0.2 0.5 1 2 5  
Favors control Favors experimental

| Quality of evidence | Intervention    | Control    | Reference     | Trials | Parti-<br>pants | I <sup>2</sup> | Risk/Odds/Hazard Ratio<br>95% CI | Risk/Odds/Hazard Ratio<br>95% CI |
|---------------------|-----------------|------------|---------------|--------|-----------------|----------------|----------------------------------|----------------------------------|
| Moderate            | MBCT            | ADM        | Kuyken, 2016  | 4      | 669             | 0%             | HR: 0.77 [0.60, 0.98]            |                                  |
| Very low            | St. John's Wort | Placebo    | Apaydin, 2016 | 1      | 426             | n.c.           | RR: 0.70 [0.49, 1.02]            |                                  |
|                     |                 | ADM        | Apaydin, 2016 | 1      | 241             | n.c.           | RR: 4.17 [0.47, 33.33]           |                                  |
|                     | Folate          | Adjunctive | Almeida, 2015 | 1      | 153             | n.c.           | OR: 0.33 [0.12, 0.94]            |                                  |

0.2    0.5    1    2    5

Favors experimental      Favors control



Supplementary information to "Complementary therapies for clinical depression: an overview of systematic reviews" by Heidemarie Haller, Dennis Anheyer, Holger Cramer, Gustav Dobos

Supplementary table 1: Characteristics and outcomes of the included meta-analyses.

| Included meta-analysis    | Diagnosis                | Number of studies | Studies with low risk of bias | Quality of the meta-analyses                         | Instruments used | Follow-up time | Pooled treatment effects (respective latest follow-up) with quality of evidence ratings according to GRADE | Safety                                                                                                                                                                                                                                                                                                                                                                                                                                                                                                                                                                                                                                                                                                                                                                                                                                                                                                                                                                                                                                                                                                                                                                                                                                                                         |                                                                                                                                                                                                                                                                                                                                                                                                                          |
|---------------------------|--------------------------|-------------------|-------------------------------|------------------------------------------------------|------------------|----------------|------------------------------------------------------------------------------------------------------------|--------------------------------------------------------------------------------------------------------------------------------------------------------------------------------------------------------------------------------------------------------------------------------------------------------------------------------------------------------------------------------------------------------------------------------------------------------------------------------------------------------------------------------------------------------------------------------------------------------------------------------------------------------------------------------------------------------------------------------------------------------------------------------------------------------------------------------------------------------------------------------------------------------------------------------------------------------------------------------------------------------------------------------------------------------------------------------------------------------------------------------------------------------------------------------------------------------------------------------------------------------------------------------|--------------------------------------------------------------------------------------------------------------------------------------------------------------------------------------------------------------------------------------------------------------------------------------------------------------------------------------------------------------------------------------------------------------------------|
| <b>Acupuncture</b>        |                          |                   |                               |                                                      |                  |                |                                                                                                            |                                                                                                                                                                                                                                                                                                                                                                                                                                                                                                                                                                                                                                                                                                                                                                                                                                                                                                                                                                                                                                                                                                                                                                                                                                                                                |                                                                                                                                                                                                                                                                                                                                                                                                                          |
| <b>Manual acupuncture</b> | Smith 2018 <sup>50</sup> | MDD, CSD          | 49 RCTs                       | SB: 9<br>PB: 9<br>DB: 5<br>AB: 24<br>RB: 2<br>OB: 15 | AMSTAR: 10       | HAMD<br>BDI    | 1.5-12 weeks                                                                                               | Severity:<br>– Sign. greater effects than TAU (4 RCTs; SMD=-0.56; 95%CI=[-0.98,-0.15]; I <sup>2</sup> =62%; p=.03; N=458; ⊕○○○ very low <sup>a,c,d,e</sup> )<br>– No sign. effects versus invasive SHAM (7 RCTs; SMD=-0.43; 95%CI=[-0.95,0.08]; I <sup>2</sup> =80%; p<.001; N=418; ⊕○○○ very low <sup>a,c,d,e</sup> )#<br>– Similar effects as SSRI/TCA (19 RCTs; SMD=-0.24; 95%CI=[-0.51,0.02]; I <sup>2</sup> =87%; p<.001; N=1967; ⊕○○○ very low <sup>a,c,e</sup> )§<br>– Sign. greater effects as adjunctive to SSRI versus SSRI (8 RCTs; SMD=-1.32; 95%CI=[-2.09,-0.55]; I <sup>2</sup> =93%; p<.001; N=539; ⊕○○○ very low <sup>a,c,e</sup> )<br>Remission:<br>– No sign. effects versus TAU (2 RCTs; RR=1.67; 95%CI=[0.77,3.65]; I <sup>2</sup> =0%; p=.44; N=94; ⊕○○○ very low <sup>a,d,e</sup> )<br>– No sign. effects versus invasive SHAM (5 RCTs; RR=1.89; 95%CI=[0.75,4.75]; I <sup>2</sup> =63; p=.03; N=368; ⊕○○○ very low <sup>a,c,d,e</sup> )<br>– Sign. smaller effects than SSRI/TCA (18 RCTs; RR=1.21; 95%CI=[1.06,1.39]; I <sup>2</sup> =18%; p=.24; N=1952; ⊕⊕○○ low <sup>a,e</sup> )§<br>– No sign. effects as adjunctive to SSRI versus SSRI (5 RCTs; RR=1.33; 95%CI=[0.65,2.73]; I <sup>2</sup> =76%; p=.002; N=299; ⊕○○○ very low <sup>a,c,e</sup> ) | – Similar AEs as TAU (1 RCT; RR=0.89; 95%CI=[0.35,2.24]; I <sup>2</sup> =n.c.; N=320)<br>– Similar AEs as invasive SHAM (1 RCT; RR=2.5; 95%CI=[0.15,40.37]; I <sup>2</sup> =n.c.; N=17)<br>– Similar AEs adjunctive to SSRI versus SSRI (2 RCTs; SMD=-0.37; 95%CI=[-1.2,0.47]; I <sup>2</sup> =84%; N=150)<br>– Sign. less AEs than SSRI (3 RCTs; SMD=-1.75; 95%CI=[-3.17,-0.32]; I <sup>2</sup> =96%; p p<.001; N=481)# |

Supplementary table 1: continued

2

|                           | Included meta-analysis    | Diagnosis | Number of studies | Studies with low risk of bias                                  | Quality of the meta-analyses | Instruments used | Follow-up time | Pooled treatment effects (respective latest follow-up) with quality of evidence ratings according to GRADE                                                                                                                                                                                                                                                                                                                                                                                                                                                                                                                                                                                                                                                                                                                                                                                                                                                                                                                                                                                                                                                                                                                                     | Safety                                                                                                                                                                                                                                                                               |
|---------------------------|---------------------------|-----------|-------------------|----------------------------------------------------------------|------------------------------|------------------|----------------|------------------------------------------------------------------------------------------------------------------------------------------------------------------------------------------------------------------------------------------------------------------------------------------------------------------------------------------------------------------------------------------------------------------------------------------------------------------------------------------------------------------------------------------------------------------------------------------------------------------------------------------------------------------------------------------------------------------------------------------------------------------------------------------------------------------------------------------------------------------------------------------------------------------------------------------------------------------------------------------------------------------------------------------------------------------------------------------------------------------------------------------------------------------------------------------------------------------------------------------------|--------------------------------------------------------------------------------------------------------------------------------------------------------------------------------------------------------------------------------------------------------------------------------------|
| <b>Electroacupuncture</b> | Smith 2018 <sup>50</sup>  | MDD, CSD  | 21 RCTs           | SB: 6<br>PB: 3<br>DB: 5<br>AB: 16<br>RB: 1<br>OB: 12           | AMSTAR: 10                   | HAMD<br>BDI      | 2-6 weeks      | <p>Severity:</p> <ul style="list-style-type: none"> <li>– Sign. greater effects than TAU (1 RCT; SMD=-1.26; 95%CI=[-2.10,-0.43]; I<sup>2</sup>=n.c.; N=30; ⊕○○○ very low<sup>a,c,d,e</sup>)</li> <li>– No sign. effects versus invasive SHAM (5 RCTs; SMD=0.12; 95%CI=[-0.14,0.38]; I<sup>2</sup>=0%; p=.82; N=251; ⊕○○○ very low<sup>a,d,e</sup>)<sup>#</sup></li> <li>– Sign. greater effects than SSRI/TCA (10 RCTs; SMD=-0.28; 95%CI=[-0.47,-0.09]; I<sup>2</sup>=33%; p=.14; N=995; ⊕⊕○○ low<sup>a,e</sup>)<sup>§</sup></li> <li>– Sign. greater effects as adjunctive to SSRI versus SSRI (5 RCTs; SMD=-0.84; 95%CI=[-1.16,-0.51]; I<sup>2</sup>=33%; p=.20; N=274; ⊕⊕○○ low<sup>a,e</sup>)</li> </ul> <p>Remission:</p> <ul style="list-style-type: none"> <li>– No sign. effects versus invasive SHAM (2 RCTs; RR=1.23; 95%CI=[0.35,4.29]; I<sup>2</sup>=20; p=.26; N=87; ⊕○○○ very low<sup>a,d,e</sup>)</li> <li>– Similar effects as SSRI/TCA (8 RCTs; RR=1.01; 95%CI=[0.92,1.11]; I<sup>2</sup>=0%; p=.43; N=966; ⊕⊕○○ low<sup>a,e</sup>)<sup>§</sup></li> <li>– No sign. effects as adjunctive to SSRI versus SSRI (5 RCTs; RR=1.17; 95%CI=[0.75,1.80]; I<sup>2</sup>=49%; p=.10; N=273; ⊕○○○ very low<sup>a,d,e</sup>)</li> </ul> | <ul style="list-style-type: none"> <li>– Similar AEs as invasive SHAM (4 RCTs; RR=1.79; 95%CI=[0.99,3.25]; I<sup>2</sup>=16%; p=.31; N=244)</li> <li>– Sign. less AEs as adjunctive to SSRI versus SSRI (1 RCT; SMD=-3.39; 95%CI=[-4.27,-2.50]; I<sup>2</sup>=n.c.; N=50)</li> </ul> |
| <b>Herbs</b>              |                           |           |                   |                                                                |                              |                  |                |                                                                                                                                                                                                                                                                                                                                                                                                                                                                                                                                                                                                                                                                                                                                                                                                                                                                                                                                                                                                                                                                                                                                                                                                                                                |                                                                                                                                                                                                                                                                                      |
| <b>St. John's wort</b>    | Linde 2008 <sup>149</sup> | MDD       | 29 RCTs           | SB: 18<br>PB: 29<br>DB: n.r.<br>AB: 29<br>RB: n.r.<br>OB: n.r. | AMSTAR: 8                    | HAMD<br>MADRS    | 4-12 weeks     | <p>Response (50%):</p> <ul style="list-style-type: none"> <li>– Sign. greater effects than PLACEBO (18 RCTs; RR=1.48; 95%CI=[1.23,1.77]; I<sup>2</sup>=75%; p&lt;.001; N=3064; ⊕⊕⊕○ moderate<sup>c</sup>)</li> <li>– Similar effects as SSRI/TCA/TECA (17 RCTs; RR=1.01; 95%CI=[0.93,1.09]; I<sup>2</sup>=17%; p=.25; N=2810; ⊕⊕⊕○ moderate<sup>a</sup>)</li> </ul>                                                                                                                                                                                                                                                                                                                                                                                                                                                                                                                                                                                                                                                                                                                                                                                                                                                                            | <ul style="list-style-type: none"> <li>– Similar AEs as PLACEBO (14 RCTs; OR=0.98; 95%CI=[0.78,1.23]; I<sup>2</sup>=n.r.; N=2496),</li> <li>– Sign. less than ADMs (14 RCTs; OR=0.56; 95%CI=[0.43,0.74]; I<sup>2</sup>=n.r.; N=2663)</li> </ul>                                      |

Supplementary table 1: continued

|                                                                                                                                                                                                             | Included meta-analysis                                               | Diagnosis | Number of studies | Studies with low risk of bias                            | Quality of the meta-analyses | Instruments used | Follow-up time | Pooled treatment effects (respective latest follow-up) with quality of evidence ratings according to GRADE                                                                                                                                                                                                                                                                                                                                                                                                                                                                                                                                                                                                                                                                                                                                                                                                                                                                                                                                                                                                                                                                                 | Safety                                                                                                                                                                                      |
|-------------------------------------------------------------------------------------------------------------------------------------------------------------------------------------------------------------|----------------------------------------------------------------------|-----------|-------------------|----------------------------------------------------------|------------------------------|------------------|----------------|--------------------------------------------------------------------------------------------------------------------------------------------------------------------------------------------------------------------------------------------------------------------------------------------------------------------------------------------------------------------------------------------------------------------------------------------------------------------------------------------------------------------------------------------------------------------------------------------------------------------------------------------------------------------------------------------------------------------------------------------------------------------------------------------------------------------------------------------------------------------------------------------------------------------------------------------------------------------------------------------------------------------------------------------------------------------------------------------------------------------------------------------------------------------------------------------|---------------------------------------------------------------------------------------------------------------------------------------------------------------------------------------------|
| 1<br>2<br>3<br>4<br>5<br>6<br>7<br>8<br>9<br>10<br>11<br>12<br>13<br>14<br>15<br>16<br>17<br>18<br>19<br>20<br>21<br>22<br>23<br>24<br>25<br>26<br>27<br>28<br>29<br>30<br>31<br>32<br>33<br>34<br>35<br>36 | <b>St. John's wort</b><br>(continued)<br>Apaydin 2016 <sup>141</sup> | MDD       | 35 RCTs           | SB: 9<br>PB: 27<br>DB: 5<br>AB: 26<br>RB: 3<br>OB: 33    | AMSTAR: 9                    | HAMD             | 4-32 weeks     | Severity:<br>– Sign. greater effects than PLACEBO (16 RCTs; SMD=-0.49; 95%CI=[-0.74,-0.23]; I <sup>2</sup> =89%; p=n.r.; N=2888; ⊕⊕⊕○ moderate <sup>c</sup> )<br>– Similar effects as ADM (14 RCTs; SMD=-0.03; 95%CI=[-0.21,0.15]; I <sup>2</sup> =74%; p=n.r.; N=2248; ⊕⊕○○ low <sup>a,c</sup> )<br>Response (50%):<br>– Sign. greater effects than PLACEBO (18 RCTs; RR=1.53; 95%CI=[1.19,1.97]; I <sup>2</sup> =79%; p=n.r.; N=2922; ⊕⊕⊕○ moderate <sup>c</sup> )<br>– Similar effects as ADM (17 RCTs; RR=1.01; 95%CI=[0.90,1.14]; I <sup>2</sup> =52%; p=n.r.; N=2776; ⊕⊕⊕○ moderate <sup>a</sup> )<br>Remission:<br>– No sign. effects versus PLACEBO (9 RCTs; RR=1.69; 95%CI=[0.63,4.55]; I <sup>2</sup> =94%; p=n.r.; N=1419; ⊕○○○ very low <sup>a,c,d</sup> )<br>– Similar effects as ADM (7 RCTs; RR=1.17; 95%CI=[0.84,1.62]; I <sup>2</sup> =29%; p=n.r.; N=787; ⊕⊕⊕○ moderate <sup>a</sup> )<br>Relapse:<br>– No sign. effects versus PLACEBO (1 RCT; RR=0.70; 95%CI=[0.49,1.02]; I <sup>2</sup> =n.c.; N=426; ⊕○○○ very low <sup>a,c,d</sup> )<br>– Similar effects as ADM (1 RCT; RR=4.17; 95%CI=[0.47,33.33]; I <sup>2</sup> =n.c.; N=241; ⊕○○○ very low <sup>a,c,d</sup> ) | – Similar AEs as PLACEBO (13 RCTs; OR=0.83; 95%CI=[0.62,1.13]; I <sup>2</sup> =n.r.; N=2600),<br>– Sign. less than ADMs (11 RCTs; OR=0.67; 95%CI=[0.56,0.81]; I <sup>2</sup> =n.r.; N=1946) |
| 37<br>38<br>39<br>40<br>41<br>42<br>43<br>44<br>45<br>46                                                                                                                                                    | <b>Saffron</b><br>Hausenblas 2013 <sup>146</sup>                     | MDD       | 5 RCTs            | SB: 5<br>PB: 5<br>DB: 5<br>AB: 5<br>RB: n.r.<br>OB: n.r. | AMSTAR: 7                    | HAMD             | 6-8 weeks      | Severity:<br>– Sign. greater effects than PLACEBO (2 RCTs; SMD=-1.62; 95%CI=[-2.14,-1.10]; I <sup>2</sup> =0%; p=n.r.; N=71; ⊕○○○ very low <sup>c,d,e</sup> )<br>– Similar effects as SSRI/TCA (3 RCTs; SMD=-0.15; 95%CI=[-0.52,0.22]; I <sup>2</sup> =0%; p=n.r.; N=106; ⊕○○○ very low <sup>c,d,e</sup> )                                                                                                                                                                                                                                                                                                                                                                                                                                                                                                                                                                                                                                                                                                                                                                                                                                                                                 | – No serious AEs                                                                                                                                                                            |

Supplementary table 1: continued

|                           | Included meta-analysis         | Diagnosis | Number of studies | Studies with low risk of bias                             | Quality of the meta-analyses | Instruments used | Follow-up time  | Pooled treatment effects (respective latest follow-up) with quality of evidence ratings according to GRADE                                                                                                                                                                                                                                                                                                                                                                                                                                                                                                                                      | Safety                                                                                                                                                                                                        |
|---------------------------|--------------------------------|-----------|-------------------|-----------------------------------------------------------|------------------------------|------------------|-----------------|-------------------------------------------------------------------------------------------------------------------------------------------------------------------------------------------------------------------------------------------------------------------------------------------------------------------------------------------------------------------------------------------------------------------------------------------------------------------------------------------------------------------------------------------------------------------------------------------------------------------------------------------------|---------------------------------------------------------------------------------------------------------------------------------------------------------------------------------------------------------------|
| <b>Curcuma</b>            | Ng 2017 <sup>154</sup>         | MDD, CSD  | 6 RCTs            | SB: 3<br>PB: 3<br>DB: 3<br>AB: 2<br>RB: 2<br>OB: 1        | AMSTAR: 6                    | HAMD, BDI        | 4-8 weeks       | Severity:<br>– Sign. greater effects than PLACEBO (6 RCTs; SMD=-0.34; 95%CI=[-0.56,-0.13]; I <sup>2</sup> =0%; p=.82; N=377; ⊕○○○ very low <sup>a,d,e</sup> )                                                                                                                                                                                                                                                                                                                                                                                                                                                                                   | – No serious AEs                                                                                                                                                                                              |
| <b>Chinese herbs</b>      | Yeung 2014 <sup>161</sup>      | MND       | 21 RCTs           | SB: 5<br>PB: 11<br>DB: 9<br>AB: 21<br>RB: 20<br>OB: 18    | AMSTAR: 4                    | HAMD             | 6-8,5 weeks     | Severity:<br>– Sign. greater effects than PLACEBO (4 RCTs; SMD=-1.27; 95%CI=[-1.67,-0.87]; I <sup>2</sup> =44%; p=.14; N=251; ⊕○○○ very low <sup>b,e</sup> )#<br>– Similar effects as SSRI/SNRI/TCA/TECA (9 RCTs; SMD=0.17; 95%CI=[-0.12,0.46]; I <sup>2</sup> =82%; p<.001; N=1962; ⊕○○○ very low <sup>b,c,e</sup> )#<br>Response (30%):<br>– Sign. greater effects than PLACEBO (3 RCTs; RR=2.99; 95%CI=[2.18,4.10]; I <sup>2</sup> =0%; p=.53; N=281; ⊕○○○ very low <sup>c,d,e</sup> )<br>– Similar effects as SSRI/SNRI/TCA/TECA (10 RCTs; RR=1.00; 95%CI=[0.94,1.07]; I <sup>2</sup> =42%; p=.08; N=1635; ⊕○○○ very low <sup>b,c,e</sup> ) | – Similar AEs as PLACEBO (3 RCTs; RR=1.29; 95%CI=[0.86,1.95]; I <sup>2</sup> =61%; p= n.r.; N=n.r.)<br>– Sign. less AEs than ADMs (29 RCTs; RR=0.23; 95%CI=[0.16,0.33]; I <sup>2</sup> =59%; p= n.r.; N=n.r.) |
| <b>Light therapy</b>      |                                |           |                   |                                                           |                              |                  |                 |                                                                                                                                                                                                                                                                                                                                                                                                                                                                                                                                                                                                                                                 |                                                                                                                                                                                                               |
| <b>Bright white light</b> | Tuunainen 2004 <sup>160</sup>  | MND       | 18                | SB: 2<br>PB: 0<br>DB: 13<br>AB: 1<br>RB: n.r.<br>OB: n.r. | AMSTAR: 9                    | HAMD, GDS        | 1 day - 8 weeks | Severity:<br>– Sign. greater effects than adjunctive to ADM than SHAM + ADM (18 RCTs; SMD=-0.20; 95%CI=[-0.38,-0.01]; I <sup>2</sup> =60%; p<.001; N=505; ⊕○○○ very low <sup>a,c,d</sup> )<br>Response:<br>– No effects than adjunctive to ADM than SHAM + ADM (3 RCTs; RR=0.94; 95%CI=[0.61,1.46]; I <sup>2</sup> =69%; p=.004; N=71; ⊕○○○ very low <sup>a,c,d</sup> )                                                                                                                                                                                                                                                                         | – No serious AEs                                                                                                                                                                                              |
|                           | Martensson 2015 <sup>151</sup> | SAD       | 8 RCTs            | N.r.                                                      | AMSTAR: 5                    | HAMD, SIGH-SAD   | 2-6 weeks       | Severity:<br>– Sign. greater effects than SHAM (8 RCTs; SMD=-0.54; 95%CI=[-0.95,-0.13]; I <sup>2</sup> =n.r.; N=179; ⊕○○○ very low <sup>b,c,d,e</sup> )                                                                                                                                                                                                                                                                                                                                                                                                                                                                                         | N.r.                                                                                                                                                                                                          |

Supplementary table 1: continued

|                                        | Included meta-analysis      | Diagnosis | Number of studies | Studies with low risk of bias                      | Quality of the meta-analyses | Instruments used    | Follow-up time | Pooled treatment effects (respective latest follow-up) with quality of evidence ratings according to GRADE                                                                                                                                                                                                                | Safety           |
|----------------------------------------|-----------------------------|-----------|-------------------|----------------------------------------------------|------------------------------|---------------------|----------------|---------------------------------------------------------------------------------------------------------------------------------------------------------------------------------------------------------------------------------------------------------------------------------------------------------------------------|------------------|
| <b>Meditative movement therapies</b>   |                             |           |                   |                                                    |                              |                     |                |                                                                                                                                                                                                                                                                                                                           |                  |
| <b>Dance therapy</b>                   | Meekums 2015 <sup>152</sup> | MND       | 2 RCTs            | SB: 1<br>PB: 0<br>DB: 1<br>AB: 2<br>RB: 2<br>OB: 1 | AMSTAR: 9                    | HAMD                | 4-12 weeks     | Severity:<br>– Sign. greater effects as adjunctive to ADM versus ADM (2 RCTs; SMD=-1.06; 95%CI=[-1.46,-0.65]; I <sup>2</sup> =0%; p=.70; N=107; ⊕⊕○○ low <sup>d,cj</sup> #                                                                                                                                                | – No serious AEs |
| <b>Qi Gong and Tai Chi</b>             | Liu 2015 <sup>150</sup>     | MDD, CSD  | 5 RCTs            | N.r.                                               | AMSTAR: 4                    | HAMD, GDS, CESD     | 10-16 weeks    | Severity:<br>– Sign. greater effects than TAU for Qi Gong (2 RCTs; SMD=-1.27; 95%CI=[-2.09,-0.45]; I <sup>2</sup> =74%; p=.05; N=120; ⊕○○○ very low <sup>b,c,d,e</sup> )* but no sign. effects for Tai Chi (3 RCTs; SMD=-0.61; 95%CI=[-1.55,0.34]; I <sup>2</sup> =78%; p=.01; N=120; ⊕○○○ very low <sup>b,c,d,e</sup> )* | N.r.             |
| <b>Yoga</b>                            | Cramer 2013 <sup>144</sup>  | MDD, CSD  | 5 RCTs            | SB: 0<br>PB: 0<br>DB: 1<br>AB: 1<br>RB: 5<br>OB: 3 | AMSTAR: 8                    | HAMD, ZGS, GDS, BDI | 4-8 weeks      | Severity:<br>– Sign. greater effects than TAU (4 RCTs; SMD=-1.03; 95%CI=[-1.90,-0.16]; I <sup>2</sup> =82%; p<.001; N=141; ⊕○○○ very low <sup>a,c,d,e</sup> )*<br>– Sign. greater effects than EXERCISE (2 RCTs; SMD=-0.59; 95%CI=[-1.90,-0.16]; I <sup>2</sup> =68%; p=.08; N=108; ⊕○○○ very low <sup>a,c,d,e</sup> )    | N.r.             |
| <b>Mindfulness-based interventions</b> |                             |           |                   |                                                    |                              |                     |                |                                                                                                                                                                                                                                                                                                                           |                  |
| <b>MBCT</b>                            | Strauss 2014 <sup>158</sup> | MDD       | 4 RCTs            | N.r.                                               | AMSTAR: 5                    | HAMD, BDI           | 8-12 weeks     | Severity:<br>– Sign. greater effects than TAU (3 RCTs; SMD=-0.97; 95%CI=[-1.81,-0.12]; I <sup>2</sup> =72%; p=.03; N=115; ⊕○○○ very low <sup>b,c,d</sup> ) <sup>§</sup><br>– Similar effects as CBT (1 RCT; SMD=-0.16; 95%CI=[-0.75,0.43]; I <sup>2</sup> =n.c.; N=45; ⊕○○○ very low <sup>b,c,d</sup> ) <sup>§</sup>      | N.r.             |

Supplementary table 1: continued

6

|                            | Included meta-analysis      | Diagnosis | Number of studies | Studies with low risk of bias                         | Quality of the meta-analyses | Instruments used | Follow-up time | Pooled treatment effects (respective latest follow-up) with quality of evidence ratings according to GRADE                                                                                                                                                                                                                    | Safety                                                                                |
|----------------------------|-----------------------------|-----------|-------------------|-------------------------------------------------------|------------------------------|------------------|----------------|-------------------------------------------------------------------------------------------------------------------------------------------------------------------------------------------------------------------------------------------------------------------------------------------------------------------------------|---------------------------------------------------------------------------------------|
| <b>MBCT</b><br>(continued) | Kuyken 2016 <sup>148</sup>  | MDD       | 4 RCTs            | SB: 4<br>PB: 0<br>DB: 3<br>AB: 4<br>RB: 4<br>OB: 4    | AMSTAR: 6                    | SCID, BDI        | 60 weeks       | Relapse:<br>– Sign. greater effects than ADM (4 RCTs; HR=0.77; 95%CI=[0.60,0.98]; I <sup>2</sup> =0%; p=.92; N=669; ⊕⊕⊕○ moderate <sup>d</sup> )                                                                                                                                                                              | – No serious AEs                                                                      |
| <b>MBSR</b>                | Bo 2017 <sup>143</sup>      | CSD       | 5 RCTs            | SB: 0<br>PB: 0<br>DB: 1<br>AB: 5<br>RB: 5<br>OB: n.r. | AMSTAR: 6                    | HAMD, GDS        | 8-12 weeks     | Severity:<br>– Sign. greater effects than TAU/enhanced TAU (5 RCTs; SMD=-1.09; 95%CI=[-1.41,-0.76]; I <sup>2</sup> =56%; p=.06; N=396; ⊕⊕○○ low <sup>a,c</sup> )                                                                                                                                                              | N.r.                                                                                  |
| <b>Music therapy</b>       |                             |           |                   |                                                       |                              |                  |                |                                                                                                                                                                                                                                                                                                                               |                                                                                       |
| <b>Music therapy</b>       | Zhao 2016 <sup>162</sup>    | MND       | 8 RCTs            | SB: 0<br>PB: 0<br>DB: 0<br>AB: 8<br>RB: 7<br>OB: 8    | AMSTAR: 7                    | HAMD, GDS, HADS  | 4-52 weeks     | Severity:<br>– Sign. greater effects than TAU (5 RCTs; SMD=-0.57; 95%CI=[-1.03,-0.11]; I <sup>2</sup> =76%; p<.001; N=244; ⊕○○○ very low <sup>a,c,d</sup> )*<br>– Sign. greater effects as adjunctive to ADM versus ADM (3 RCTs; SMD=-0.88; 95%CI=[-1.07,-0.68]; I <sup>2</sup> =0%; p=.63; N=257; ⊕⊕○○ low <sup>a,e</sup> )* | N.r.                                                                                  |
|                            | Aalbers 2017 <sup>138</sup> | MDD, CSD  | 8 RCTs            | SB: 2<br>PB: 1<br>DB: 1<br>AB: 7<br>RB: 2<br>OB: 3    | AMSTAR: 11                   | HAMD             | 12 weeks       | Severity:<br>– Sign. greater effects than TAU (4 RCTs; SMD=-0.98; 95%CI=[-1.69,-0.27]; I <sup>2</sup> =83%; p<.001; N=219; ⊕○○○ very low <sup>a,c,d</sup> )<br>– Similar effects as CBT (4 RCTs; SMD=-1.28; 95%CI=[-3.57,1.02]; I <sup>2</sup> =96%; p<.001; N=131; ⊕○○○ very low <sup>a,c,d</sup> )                          | – Similar AEs as TAU (1 RCT; OR=0.45; 95%CI=[0.02,11.46]; I <sup>2</sup> =n.c.; N=79) |

Supplementary table 1: continued

|                                      | Included meta-analysis       | Diagnosis | Number of studies | Studies with low risk of bias                          | Quality of the meta-analyses | Instruments used                 | Follow-up time | Pooled treatment effects (respective latest follow-up) with quality of evidence ratings according to GRADE                                                                                                                                                                                                                                                                                                                                                                                                                                                                                                                                                                                                                                                         | Safety                                                                                              |
|--------------------------------------|------------------------------|-----------|-------------------|--------------------------------------------------------|------------------------------|----------------------------------|----------------|--------------------------------------------------------------------------------------------------------------------------------------------------------------------------------------------------------------------------------------------------------------------------------------------------------------------------------------------------------------------------------------------------------------------------------------------------------------------------------------------------------------------------------------------------------------------------------------------------------------------------------------------------------------------------------------------------------------------------------------------------------------------|-----------------------------------------------------------------------------------------------------|
| <b>Religious/spiritual therapies</b> |                              |           |                   |                                                        |                              |                                  |                |                                                                                                                                                                                                                                                                                                                                                                                                                                                                                                                                                                                                                                                                                                                                                                    |                                                                                                     |
| <b>Faith-adapted CBT</b>             | Anderson 2015 <sup>140</sup> | MDD, CSD  | 9 RCTs            | SB: 0<br>PB: 0<br>DB: 4<br>AB: 4<br>RB: 9<br>OB: 0     | AMSTAR: 7                    | N.r.                             | N.r.           | Severity:<br>– Sign. greater effects than TAU (6 RCTs; SMD=-0.69; 95%CI=[-1.21,-0.17]; I <sup>2</sup> =82%; p=.004; N=304; ⊕○○○ very low <sup>a,c,d</sup> ) <sup>§</sup><br>– Sign. greater effects than CBT (6 RCTs; SMD=-0.54; 95%CI=[-0.82,-0.25]; I <sup>2</sup> =0%; p=.78; N=199; ⊕⊕○○ low <sup>a,e</sup> ) <sup>§</sup>                                                                                                                                                                                                                                                                                                                                                                                                                                     | N.r.                                                                                                |
| <b>Supplements</b>                   |                              |           |                   |                                                        |                              |                                  |                |                                                                                                                                                                                                                                                                                                                                                                                                                                                                                                                                                                                                                                                                                                                                                                    |                                                                                                     |
| <b>Inositol</b>                      | Mukai 2014 <sup>153</sup>    | MDD       | 2 RCTs            | N.r.                                                   | AMSTAR: 4                    | HAMD                             | 4 weeks        | Severity:<br>– No sign. effects as adjunctive to SSRI versus PLACEBO + SSRI (2 RCTs; SMD=0.17; 95%CI=[-0.33,0.66]; I <sup>2</sup> =0%; p=.93; N=78; ⊕○○○ very low <sup>b,d,e</sup> )                                                                                                                                                                                                                                                                                                                                                                                                                                                                                                                                                                               | – Similar AEs as adjunctive to ADM (1 RCT; RR=3.21; 95%CI=[0.14,72.55]; I <sup>2</sup> =n.c.; N=36) |
| <b>Omega-3 fatty acids</b>           | Appleton 2015 <sup>142</sup> | MDD       | 26 RCTs           | SB: 15<br>PB: 6<br>DB: 19<br>AB: 8<br>RB: 16<br>OB: 25 | AMSTAR: 9                    | HAMD, MADRS, BDI, GDS, HSCL, IDS | 4-16 weeks     | Severity:<br>– Sign. greater effects than PLACEBO (25 RCTs; SMD=-0.30; 95%CI=[-0.50,-0.10]; I <sup>2</sup> =59%; p<.001; N=1373; ⊕○○○ very low <sup>a,c,d,e</sup> )<br>– Similar effects as SSRI (1 RCT; SMD=-0.08; 95%CI=[-0.70,0.54]; I <sup>2</sup> =n.c.; N=40; ⊕○○○ very low <sup>a,c,d,e</sup> )<br>Response (50%):<br>– No sign. effects versus PLACEBO (15 RCTs; OR=1.39; 95%CI=[0.95,2.04]; I <sup>2</sup> =6%; p=.38; N=611; ⊕○○○ very low <sup>a,d,e</sup> )<br>– Similar effects as SSRI (1 RCT; OR=1.23; 95%CI=[0.35,4.31]; I <sup>2</sup> =n.c.; N=40; ⊕○○○ very low <sup>a,c,d,e</sup> )<br>Remission:<br>– No sign. effects versus PLACEBO (6 RCTs; OR=1.38; 95%CI=[0.87,2.20]; I <sup>2</sup> =7%; p=.37; N=426; ⊕○○○ very low <sup>a,d,e</sup> ) | – Similar AEs as PLACEBO (19 RCT; OR=1.24; 95%CI=[0.95,1.62]; I <sup>2</sup> =0%; p=.66; N=1207)    |

Supplementary table 1: continued

8

|                              | Included meta-analysis      | Diagnosis | Number of studies | Studies with low risk of bias                               | Quality of the meta-analyses | Instruments used | Follow-up time | Pooled treatment effects (respective latest follow-up) with quality of evidence ratings according to GRADE                                                                                                                                                                                                                                                                                                                                                                                     | Safety                                                                                                                                                                                                                                                                                    |
|------------------------------|-----------------------------|-----------|-------------------|-------------------------------------------------------------|------------------------------|------------------|----------------|------------------------------------------------------------------------------------------------------------------------------------------------------------------------------------------------------------------------------------------------------------------------------------------------------------------------------------------------------------------------------------------------------------------------------------------------------------------------------------------------|-------------------------------------------------------------------------------------------------------------------------------------------------------------------------------------------------------------------------------------------------------------------------------------------|
| <b>Probiotics</b>            | Huang 2016 <sup>147</sup>   | MDD       | 1 RCTs            | SB: 1<br>PB: 1<br>DB: 1<br>AB: 1<br>RB: 1<br>OB: 1          | AMSTAR: 7                    | BDI              | 8 weeks        | Severity:<br>– Sign. greater effects than PLACEBO (1 RCT; SMD=-0.73; 95%CI=[-1.37,-0.09]; I <sup>2</sup> =n.c.; N=40; ⊕○○○ very low <sup>c,d,e</sup> )                                                                                                                                                                                                                                                                                                                                         | N.r.                                                                                                                                                                                                                                                                                      |
| <b>S-adenosyl methionine</b> | Galizia 2016 <sup>145</sup> | MDD       | 8 RCTs            | SB: 2<br>PB: 4<br>DB: 4<br>AB: 3<br>RB: 8<br>OB: 8          | AMSTAR: 9                    | HAMD             | 6-12 weeks     | Severity:<br>– No sign. effects versus PLACEBO (2 RCTs; SMD=-0.54; 95%CI=[-1.54,0.46]; I <sup>2</sup> =72%; p=.06; N=142; ⊕○○○ very low <sup>c,d,e</sup> )<br>– Similar effects as SSRI/TCA (5 RCTs; SMD=-0.01; 95%CI=[-0.22,0.21]; I <sup>2</sup> =43%; p=.14; N=821; ⊕⊕○○ low <sup>a,e</sup> ) <sup>§</sup><br>– Sign. effects as adjunctive to SSRI versus PLACEBO + SSRI (1 RCT; SMD=-0.59; 95%CI=[-1.06,-0.12]; I <sup>2</sup> =n.c.; N=73; ⊕○○○ very low <sup>c,d,e</sup> ) <sup>#</sup> | – Similar AEs as PLACEBO (2 RCTs; RR=0.70; 95%CI=[0.16,3.01]; I <sup>2</sup> =n.r.; N=142)<br>– Similar AEs as adjunctive to ADM (1 RCT, RR=0.58; 95%CI=[0.10,3.28]; I <sup>2</sup> =n.c.; N=73)<br>– Similar AEs as ADM (2 RCTs, RR=0.75; 95%CI=[0.20,2.79]; I <sup>2</sup> =n.r.; N=52) |
| <b>Tryptophan</b>            | Shaw 2002 <sup>157</sup>    | CSD       | 2 RCTs            | SB: 2<br>PB: 2<br>DB: n.r.<br>AB: 1<br>RB: n.r.<br>OB: n.r. | AMSTAR: 7                    | HAMD             | 3-12 weeks     | Response:<br>– Sign. greater effects than PLACEBO (2 RCTs; OR=4.10; 95%CI=[1.28,13.15]; I <sup>2</sup> =0%; p=.32; N=46; ⊕○○○ very low <sup>a,d,e</sup> )                                                                                                                                                                                                                                                                                                                                      | – Sign. greater AEs than PLACEBO (2 RCTs; OR=7.41; 95%CI=[1.01,54.19]; I <sup>2</sup> =0%; p=1.0; N=64)                                                                                                                                                                                   |
| <b>Vitamin B9 (Folate)</b>   | Taylor 2003 <sup>159</sup>  | MDD       | 2 RCTs            | SB: 0<br>PB: 2<br>DB: n.r.<br>AB: 2<br>RB: n.r.<br>OB: n.r. | AMSTAR: 8                    | HAMD             | 10-24 weeks    | Severity:<br>– Sign. greater effects as adjunctive to SSRI versus PLACEBO + SSRI (2 RCTs; SMD=-0.40; 95%CI=[-0.76,-0.05]; I <sup>2</sup> =0%; p=.96; N=124; ⊕○○○ very low <sup>a,c,d,e</sup> ) <sup>#</sup>                                                                                                                                                                                                                                                                                    | – Similar AEs as PLACEBO (1 RCT; RR=0.76; 95%CI=[0.55,1.05]; I <sup>2</sup> =n.c.; N=127)                                                                                                                                                                                                 |



Supplementary table 1: continued

|                                                                                                                                                                                                                                                                                                                                                                                                                                                                                                                                                                                                                                                                                                                                                                                                                                                                                                                                                                                                                                                                                                                                                                                                                                                                                                                                                                                                                                                                                                                                                                             | Included meta-analysis      | Diagnosis | Number of studies | Studies with low risk of bias                            | Quality of the meta-analyses | Instruments used | Follow-up time | Pooled treatment effects (respective latest follow-up) with quality of evidence ratings according to GRADE                                                                                                                                                                                                                                                                                                                                                                                                                                                                   | Safety |
|-----------------------------------------------------------------------------------------------------------------------------------------------------------------------------------------------------------------------------------------------------------------------------------------------------------------------------------------------------------------------------------------------------------------------------------------------------------------------------------------------------------------------------------------------------------------------------------------------------------------------------------------------------------------------------------------------------------------------------------------------------------------------------------------------------------------------------------------------------------------------------------------------------------------------------------------------------------------------------------------------------------------------------------------------------------------------------------------------------------------------------------------------------------------------------------------------------------------------------------------------------------------------------------------------------------------------------------------------------------------------------------------------------------------------------------------------------------------------------------------------------------------------------------------------------------------------------|-----------------------------|-----------|-------------------|----------------------------------------------------------|------------------------------|------------------|----------------|------------------------------------------------------------------------------------------------------------------------------------------------------------------------------------------------------------------------------------------------------------------------------------------------------------------------------------------------------------------------------------------------------------------------------------------------------------------------------------------------------------------------------------------------------------------------------|--------|
| <b>Vitamin B9 (Folate)</b><br>(continued)                                                                                                                                                                                                                                                                                                                                                                                                                                                                                                                                                                                                                                                                                                                                                                                                                                                                                                                                                                                                                                                                                                                                                                                                                                                                                                                                                                                                                                                                                                                                   | Almeida 2015 <sup>139</sup> | MDD       | 5 RCTs            | SB: 4<br>PB: 5<br>DB: 4<br>AB: 3<br>RB: 4<br>OB: 1       | AMSTAR: 6                    | HAMD, MADRS      | 4-52 weeks     | Severity:<br>– No sign. effects as adjunctive to SSRI versus PLACEBO + SSRI (5 RCTs; SMD=-0.12; 95%CI=[-0.45,0.22]; I <sup>2</sup> =66%; p=.02; N=505; ⊕○○○ very low <sup>c,d,e</sup> )<br>Response (50%):<br>– No sign. effects as adjunctive to SSRI versus PLACEBO + SSRI (4 RCTs; OR=1.18; 95%CI=[0.49,2.83]; I <sup>2</sup> =73%; p=.001; N=478; ⊕○○○ very low <sup>c,d,e</sup> )<br>Relapse:<br>– Sign. greater effects as adjunctive to SSRI versus PLACEBO + SSRI (1 RCT, OR=0.33; 95%CI=[0.12, 0.94]; I <sup>2</sup> =n.c.; N=153; ⊕○○○ very low <sup>c,d,e</sup> ) | N.r.   |
| <b>Vitamin D</b>                                                                                                                                                                                                                                                                                                                                                                                                                                                                                                                                                                                                                                                                                                                                                                                                                                                                                                                                                                                                                                                                                                                                                                                                                                                                                                                                                                                                                                                                                                                                                            | Shaffer 2014 <sup>156</sup> | MDD, CSD  | 2 RCTs            | SB: 0<br>PB: 0<br>DB: 1<br>AB: 0<br>RB: n.r.<br>OB: n.r. | AMSTAR: 7                    | HAMD, BDI        | 8 weeks        | Severity:<br>– Sign. greater effects than PLACEBO (2 RCTs; SMD=-0.60; 95%CI=[-1.19,-0.01]; I <sup>2</sup> =n.r.; N=149; ⊕○○○ very low <sup>a,c,d,e</sup> )                                                                                                                                                                                                                                                                                                                                                                                                                   | N.r.   |
| <b>Zinc</b>                                                                                                                                                                                                                                                                                                                                                                                                                                                                                                                                                                                                                                                                                                                                                                                                                                                                                                                                                                                                                                                                                                                                                                                                                                                                                                                                                                                                                                                                                                                                                                 | Schefft 2017 <sup>155</sup> | MDD       | 3 RCTs            | N.r.                                                     | AMSTAR: 5                    | HAMD, BDI        | 6-12 weeks     | Severity:<br>– Sign. greater effects as adjunctive to SSRI/TCA versus SSRI/TCA (3 RCTs; SMD=-0.66; 95%CI=[-1.06,-0.26]; I <sup>2</sup> =0%; p=.45; N=104; ⊕○○○ very low <sup>b,d,e</sup> )                                                                                                                                                                                                                                                                                                                                                                                   | N.r.   |
| Abbreviations: AB: Attrition bias; ADM: Antidepressant medication; AE: Adverse events; AMSTAR: Assessment of the Methodological Quality of Systematic Reviews tool; BDI: Beck Depression Inventory; CBT: Cognitive Behavioral Therapy; CESD: Center for Epidemiologic Studies Depression Scale; CSD: Clinical symptoms of depression (questionnaire based diagnosis); DB: Detection bias; GDS: Geriatric Depression Scale; HADS: Hospital Anxiety and Depression Scale; HAMD: Hamilton Rating Scale for Depression; HR: Hazard ratio; HSCL: Hopkins Symptom Checklist Depression Scale; I <sup>2</sup> : Heterogeneity; IDS: Inventory of Depressive Symptomology; MADRS: Montgomery-Asberg Depression Rating Scale; MBCT: Mindfulness-based Cognitive Therapy; MBSR: Mindfulness-based Stress Reduction; MDD: Major depressive disorder; MND: Mixed non-seasonal depression; N: Number of patients; N.c.: Not calculable because of only one included RCT; N.r.: Not reported; OB: Other bias; OR: Odds ratio; PB: Performance bias; RCT: Randomized controlled trial; RB: Reporting bias; RR: Risk ratio; SAD: Seasonal Affective Disorder; SB: Selection bias; SCID: Structured Clinical Interview; SIGH-SAD: Structured Interview Guide for the Hamilton Depression Rating Scale-Seasonal Affective Disorders; SMD: Standard mean difference; SSRI: Selective serotonin reuptake inhibitors; SNRI: Serotonin-norepinephrine reuptake inhibitor; TAU: Treatment as usual; TCA: Tricyclic antidepressants; TECA: Tetracyclic antidepressants; ZGS: Zung Depression Scale. |                             |           |                   |                                                          |                              |                  |                |                                                                                                                                                                                                                                                                                                                                                                                                                                                                                                                                                                              |        |

## Supplementary table 1: continued

10

## Notes:

\*Newly calculated effect measure of selected RCTs meeting eligibility criteria;

#Newly calculated effect measure from mean differences (MDs);

§Newly calculated effect measure from originally separate/combined analyses.

<sup>a</sup>Downgraded one level because of study limitations (overall unclear or high risk of bias);

<sup>b</sup>Downgraded two levels because of study limitations (overall unclear or high risk of bias) and limitations of the meta-analysis (AMSTAR  $\leq 5$ );

<sup>c</sup>Downgraded one level because of inconsistency (significant heterogeneity or no replication of the results);

<sup>d</sup>Downgraded one level because of imprecision (confidence interval includes negligible or no effects or fewer than 250 participants were included in total);

<sup>e</sup>Downgraded one level because of a probably high risk of publication bias.

For peer review only

**Supplementary information to “Complementary therapies for clinical depression: an overview of systematic reviews”**

by Heidemarie Haller, Dennis Anheyer, Holger Cramer, Gustav Dobos

**Supplementary table 2: Detailed AMSTAR ratings.**

|                                | Apriori design | Two data extractor and consensus | Comprehensive literature search | Inclusion of grey literature | List of included and excluded studies | Characteristics of studies provided | Adequate risk of bias assessment | Appropriate conclusions | Appropriate data syntheses | Assessment of publication bias | Conflict of interest / funding statement | Sum |
|--------------------------------|----------------|----------------------------------|---------------------------------|------------------------------|---------------------------------------|-------------------------------------|----------------------------------|-------------------------|----------------------------|--------------------------------|------------------------------------------|-----|
| Aalbers 2017 <sup>138</sup>    | 1              | 1                                | 1                               | 1                            | 1                                     | 1                                   | 1                                | 1                       | 1                          | 1                              | 1                                        | 11  |
| Almeida 2015 <sup>139</sup>    | 0              | 1                                | 1                               | 0                            | 0                                     | 1                                   | 1                                | 1                       | 1                          | 0                              | 0                                        | 6   |
| Anderson 2015 <sup>140</sup>   | 0              | 0                                | 1                               | 1                            | 0                                     | 1                                   | 1                                | 1                       | 1                          | 1                              | 0                                        | 7   |
| Apaydin 2016 <sup>141</sup>    | 1              | 1                                | 1                               | 1                            | 0                                     | 1                                   | 1                                | 1                       | 1                          | 0                              | 1                                        | 9   |
| Appleton 2015 <sup>142</sup>   | 0              | 1                                | 1                               | 1                            | 1                                     | 1                                   | 1                                | 1                       | 1                          | 1                              | 0                                        | 9   |
| Bo 2017 <sup>143</sup>         | 0              | 0                                | 1                               | 0                            | 0                                     | 1                                   | 1                                | 1                       | 1                          | 1                              | 0                                        | 6   |
| Cramer 2013 <sup>144</sup>     | 0              | 1                                | 1                               | 1                            | 1                                     | 1                                   | 1                                | 1                       | 0                          | 1                              | 0                                        | 8   |
| Galizia 2016 <sup>145</sup>    | 0              | 1                                | 1                               | 1                            | 1                                     | 1                                   | 1                                | 1                       | 1                          | 1                              | 0                                        | 9   |
| Hausenblas 2013 <sup>146</sup> | 0              | 1                                | 1                               | 1                            | 0                                     | 1                                   | 1                                | 1                       | 1                          | 0                              | 0                                        | 7   |
| Huang 2013 <sup>147</sup>      | 0              | 1                                | 1                               | 0                            | 0                                     | 1                                   | 1                                | 1                       | 1                          | 1                              | 0                                        | 7   |
| Kuyken 2016 <sup>148</sup>     | 0              | 0                                | 1                               | 0                            | 0                                     | 1                                   | 1                                | 1                       | 1                          | 1                              | 0                                        | 6   |
| Linde 2008 <sup>149</sup>      | 0              | 1                                | 1                               | 1                            | 0                                     | 1                                   | 1                                | 1                       | 1                          | 1                              | 0                                        | 8   |
| Liu 2015 <sup>150</sup>        | 0              | 0                                | 1                               | 0                            | 0                                     | 1                                   | 0                                | 1                       | 0                          | 1                              | 0                                        | 4   |
| Martensson 2015 <sup>151</sup> | 0              | 1                                | 1                               | 0                            | 1                                     | 1                                   | 0                                | 1                       | 0                          | 0                              | 0                                        | 5   |
| Meekums 2015 <sup>152</sup>    | 0              | 1                                | 1                               | 1                            | 1                                     | 1                                   | 1                                | 1                       | 1                          | 1                              | 0                                        | 9   |
| Mukai 2014 <sup>153</sup>      | 0              | 1                                | 1                               | 0                            | 0                                     | 1                                   | 0                                | 1                       | 0                          | 0                              | 0                                        | 4   |
| Ng 2017 <sup>154</sup>         | 0              | 1                                | 1                               | 0                            | 0                                     | 1                                   | 1                                | 1                       | 1                          | 0                              | 0                                        | 6   |
| Schefft 2017 <sup>155</sup>    | 0              | 1                                | 1                               | 0                            | 0                                     | 1                                   | 0                                | 1                       | 1                          | 0                              | 0                                        | 5   |
| Shaffer 2014 <sup>156</sup>    | 0              | 1                                | 1                               | 1                            | 1                                     | 1                                   | 1                                | 1                       | 0                          | 0                              | 0                                        | 7   |
| Shaw 2002 <sup>157</sup>       | 0              | 1                                | 1                               | 1                            | 1                                     | 1                                   | 0                                | 1                       | 1                          | 0                              | 0                                        | 7   |
| Smith 2018 <sup>50</sup>       | 1              | 1                                | 1                               | 1                            | 1                                     | 1                                   | 1                                | 1                       | 1                          | 1                              | 0                                        | 10  |
| Strauss 2014 <sup>158</sup>    | 0              | 0                                | 1                               | 1                            | 0                                     | 1                                   | 0                                | 0                       | 1                          | 1                              | 0                                        | 5   |
| Taylor 2003 <sup>159</sup>     | 0              | 1                                | 1                               | 1                            | 1                                     | 1                                   | 1                                | 1                       | 1                          | 0                              | 0                                        | 8   |
| Tuunainen 2004 <sup>160</sup>  | 0              | 1                                | 1                               | 1                            | 1                                     | 1                                   | 1                                | 1                       | 1                          | 1                              | 0                                        | 9   |
| Yeung 2014 <sup>161</sup>      | 0              | 1                                | 1                               | 0                            | 0                                     | 0                                   | 1                                | 1                       | 0                          | 0                              | 0                                        | 4   |
| Zhao 2016 <sup>162</sup>       | 0              | 1                                | 1                               | 0                            | 0                                     | 1                                   | 1                                | 1                       | 1                          | 1                              | 0                                        | 7   |



# PRISMA 2009 Checklist

1  
2  
3  
4  
5  
6  
7  
8  
9  
10  
11  
12  
13  
14  
15  
16  
17  
18  
19  
20  
21  
22  
23  
24  
25  
26  
27  
28  
29  
30  
31  
32  
33  
34  
35  
36  
37  
38  
39  
40  
41  
42  
43  
44  
45  
46  
47

| Section/topic                      | #  | Checklist item                                                                                                                                                                                                                                                                                              | Reported on page # |
|------------------------------------|----|-------------------------------------------------------------------------------------------------------------------------------------------------------------------------------------------------------------------------------------------------------------------------------------------------------------|--------------------|
| <b>TITLE</b>                       |    |                                                                                                                                                                                                                                                                                                             |                    |
| Title                              | 1  | Identify the report as a systematic review, meta-analysis, or both.                                                                                                                                                                                                                                         | 1                  |
| <b>ABSTRACT</b>                    |    |                                                                                                                                                                                                                                                                                                             |                    |
| Structured summary                 | 2  | Provide a structured summary including, as applicable: background; objectives; data sources; study eligibility criteria, participants, and interventions; study appraisal and synthesis methods; results; limitations; conclusions and implications of key findings; systematic review registration number. | 2                  |
| <b>INTRODUCTION</b>                |    |                                                                                                                                                                                                                                                                                                             |                    |
| Rationale                          | 3  | Describe the rationale for the review in the context of what is already known.                                                                                                                                                                                                                              | 4                  |
| Objectives                         | 4  | Provide an explicit statement of questions being addressed with reference to participants, interventions, comparisons, outcomes, and study design (PICOS).                                                                                                                                                  | 4                  |
| <b>METHODS</b>                     |    |                                                                                                                                                                                                                                                                                                             |                    |
| Protocol and registration          | 5  | Indicate if a review protocol exists, if and where it can be accessed (e.g., Web address), and, if available, provide registration information including registration number.                                                                                                                               | 5                  |
| Eligibility criteria               | 6  | Specify study characteristics (e.g., PICOS, length of follow-up) and report characteristics (e.g., years considered, language, publication status) used as criteria for eligibility, giving rationale.                                                                                                      | 5                  |
| Information sources                | 7  | Describe all information sources (e.g., databases with dates of coverage, contact with study authors to identify additional studies) in the search and date last searched.                                                                                                                                  | 6                  |
| Search                             | 8  | Present full electronic search strategy for at least one database, including any limits used, such that it could be repeated.                                                                                                                                                                               | 6                  |
| Study selection                    | 9  | State the process for selecting studies (i.e., screening, eligibility, included in systematic review, and, if applicable, included in the meta-analysis).                                                                                                                                                   | 6                  |
| Data collection process            | 10 | Describe method of data extraction from reports (e.g., piloted forms, independently, in duplicate) and any processes for obtaining and confirming data from investigators.                                                                                                                                  | 6                  |
| Data items                         | 11 | List and define all variables for which data were sought (e.g., PICOS, funding sources) and any assumptions and simplifications made.                                                                                                                                                                       | 6                  |
| Risk of bias in individual studies | 12 | Describe methods used for assessing risk of bias of individual studies (including specification of whether this was done at the study or outcome level), and how this information is to be used in any data synthesis.                                                                                      | 6-7                |
| Summary measures                   | 13 | State the principal summary measures (e.g., risk ratio, difference in means).                                                                                                                                                                                                                               | 7                  |
| Synthesis of results               | 14 | Describe the methods of handling data and combining results of studies, if done, including measures of consistency (e.g., I <sup>2</sup> ) for each meta-analysis.                                                                                                                                          | 7                  |

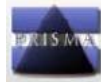

# PRISMA 2009 Checklist

Page 1 of 2

| Section/topic                 | #  | Checklist item                                                                                                                                                                                           | Reported on page # |
|-------------------------------|----|----------------------------------------------------------------------------------------------------------------------------------------------------------------------------------------------------------|--------------------|
| Risk of bias across studies   | 15 | Specify any assessment of risk of bias that may affect the cumulative evidence (e.g., publication bias, selective reporting within studies).                                                             | N.a.               |
| Additional analyses           | 16 | Describe methods of additional analyses (e.g., sensitivity or subgroup analyses, meta-regression), if done, indicating which were pre-specified.                                                         | N.a.               |
| <b>RESULTS</b>                |    |                                                                                                                                                                                                          |                    |
| Study selection               | 17 | Give numbers of studies screened, assessed for eligibility, and included in the review, with reasons for exclusions at each stage, ideally with a flow diagram.                                          | 8                  |
| Study characteristics         | 18 | For each study, present characteristics for which data were extracted (e.g., study size, PICOS, follow-up period) and provide the citations.                                                             | 8-9                |
| Risk of bias within studies   | 19 | Present data on risk of bias of each study and, if available, any outcome level assessment (see item 12).                                                                                                | 8-9                |
| Results of individual studies | 20 | For all outcomes considered (benefits or harms), present, for each study: (a) simple summary data for each intervention group (b) effect estimates and confidence intervals, ideally with a forest plot. | 9-18               |
| Synthesis of results          | 21 | Present results of each meta-analysis done, including confidence intervals and measures of consistency.                                                                                                  | 19-29              |
| Risk of bias across studies   | 22 | Present results of any assessment of risk of bias across studies (see Item 15).                                                                                                                          | N.a.               |
| Additional analysis           | 23 | Give results of additional analyses, if done (e.g., sensitivity or subgroup analyses, meta-regression [see Item 16]).                                                                                    | N.a.               |
| <b>DISCUSSION</b>             |    |                                                                                                                                                                                                          |                    |
| Summary of evidence           | 24 | Summarize the main findings including the strength of evidence for each main outcome; consider their relevance to key groups (e.g., healthcare providers, users, and policy makers).                     | 18-19              |
| Limitations                   | 25 | Discuss limitations at study and outcome level (e.g., risk of bias), and at review-level (e.g., incomplete retrieval of identified research, reporting bias).                                            | 19-50              |
| Conclusions                   | 26 | Provide a general interpretation of the results in the context of other evidence, and implications for future research.                                                                                  | 21-22              |
| <b>FUNDING</b>                |    |                                                                                                                                                                                                          |                    |
| Funding                       | 27 | Describe sources of funding for the systematic review and other support (e.g., supply of data); role of funders for the systematic review.                                                               | 23                 |

From: Moher D, Liberati A, Tetzlaff J, Altman DG, The PRISMA Group (2009). Preferred Reporting Items for Systematic Reviews and Meta-Analyses: The PRISMA Statement. PLoS Med 6(7): e1000097. doi:10.1371/journal.pmed1000097

For more information, visit: [www.prisma-statement.org](http://www.prisma-statement.org).

Page 2 of 2

For peer review only - <http://bmjopen.bmj.com/site/about/guidelines.xhtml>

# BMJ Open

## Complementary therapies for clinical depression: an overview of systematic reviews

|                                 |                                                                                                                                                                                                                                                                                                                                                                                                                                                                                                                                                                          |
|---------------------------------|--------------------------------------------------------------------------------------------------------------------------------------------------------------------------------------------------------------------------------------------------------------------------------------------------------------------------------------------------------------------------------------------------------------------------------------------------------------------------------------------------------------------------------------------------------------------------|
| Journal:                        | <i>BMJ Open</i>                                                                                                                                                                                                                                                                                                                                                                                                                                                                                                                                                          |
| Manuscript ID                   | bmjopen-2018-028527.R2                                                                                                                                                                                                                                                                                                                                                                                                                                                                                                                                                   |
| Article Type:                   | Research                                                                                                                                                                                                                                                                                                                                                                                                                                                                                                                                                                 |
| Date Submitted by the Author:   | 18-Jun-2019                                                                                                                                                                                                                                                                                                                                                                                                                                                                                                                                                              |
| Complete List of Authors:       | Haller, Heidemarie; Universitat Duisburg-Essen, Department of Internal and Integrative Medicine, Kliniken Essen-Mitte, Faculty of Medicine<br>Anheyer, Dennis; Universitat Duisburg-Essen, Department of Internal and Integrative Medicine, Kliniken Essen-Mitte, Faculty of Medicine<br>Cramer, Holger; Universitat Duisburg-Essen, Department of Internal and Integrative Medicine, Kliniken Essen-Mitte, Faculty of Medicine<br>Dobos, Gustav; Universitat Duisburg-Essen, Department of Internal and Integrative Medicine, Kliniken Essen-Mitte, Faculty of Medicine |
| <b>Primary Subject Heading</b>: | Complementary medicine                                                                                                                                                                                                                                                                                                                                                                                                                                                                                                                                                   |
| Secondary Subject Heading:      | Mental health, Patient-centred medicine                                                                                                                                                                                                                                                                                                                                                                                                                                                                                                                                  |
| Keywords:                       | Depression, Complementary Therapies, Treatment Outcome, Safety, Systematic Review, Meta-analysis                                                                                                                                                                                                                                                                                                                                                                                                                                                                         |
|                                 |                                                                                                                                                                                                                                                                                                                                                                                                                                                                                                                                                                          |

SCHOLARONE™  
Manuscripts

1  
2 1 **Complementary therapies for clinical depression: an overview of systematic reviews**  
3

4 2

5  
6 3

7  
8 4 Heidemarie Haller<sup>1\*</sup>, Dennis Anheyer<sup>1</sup>, Holger Cramer<sup>1</sup>, Gustav Dobos<sup>1</sup>  
9

10  
11 5

12  
13 6 <sup>1</sup> Department of Internal and Integrative Medicine, Kliniken Essen-Mitte, Faculty of Medicine,  
14

15 7 University of Duisburg-Essen, Essen, Germany.  
16

17 8

18  
19 9

20  
21  
22 10

23  
24 11 \*Corresponding author  
25

26 12 Heidemarie Haller  
27

28  
29 13 Department of Internal and Integrative Medicine, Kliniken Essen-Mitte, Faculty of Medicine,  
30

31 14 University of Duisburg-Essen  
32

33 15 Am Deimelsberg 34a, 45276 Essen, Germany  
34

35 16 Tel: +4920117425044  
36

37 17 E-mail: h.haller@kem-med.com  
38  
39  
40  
41  
42  
43  
44  
45  
46  
47  
48  
49  
50  
51  
52  
53  
54  
55  
56  
57  
58  
59  
60

**Abstract**

Objectives: As clinical practice guidelines vary widely in their search strategies and recommendations of complementary and alternative medicine (CAM) for depression, this overview aimed at systematically summarizing the level-1 evidence on CAM for patients with a clinical diagnosis of depression.

Methods: PubMed, PsycInfo and Central were searched for meta-analyses of randomized controlled trials (RCTs) until June 30, 2018. Outcomes included depression severity, response, remission, relapse, and adverse events. The quality of evidence was assessed according to GRADE considering the methodological quality of the RCTs (ROB) and meta-analyses (AMSTAR), inconsistency, indirectness, imprecision of the evidence, and the potential risk of publication bias.

Results: The literature search revealed 26 meta-analyses conducted between 2002 and 2018 on 1 to 49 RCTs in major, minor, and seasonal depression. In patients with mild to moderate major depression, moderate quality evidence suggested the efficacy of St. John's wort towards placebo and its comparative effectiveness towards standard antidepressants for the treatment for depression severity and response rates, while St. John's wort caused significant less adverse events. In patients with recurrent major depression, moderate quality evidence showed that Mindfulness-based Cognitive Therapy was superior to standard antidepressant drug treatment for the prevention of depression relapse. Other CAM evidence was considered as having low or very low quality.

Conclusions: The effects of all but two CAM treatments found in studies on clinical depressed patients based on low to very low quality of evidence. The evidence has to be downgraded mostly due to avoidable methodological flaws of both the original RCTs and meta-analyses not following the CONSORT and PRISMA guidelines. Further research is needed.

Keywords: Depression, Complementary Therapies, Treatment Outcome, Safety, Systematic Review



1  
2 41 **Strengths and limitations of this study**  
3

- 4 42     ▪ This systematic overview included the comprehensive literature search of important CAM  
5  
6 43     topics defined by the Cochrane Collaboration.  
7  
8 44     ▪ The inclusion criteria were restricted to meta-analyses of RCTs of patients with a clinical  
9  
10 45     diagnosis of depression.  
11  
12  
13 46     ▪ The quality of evidence from meta-analyses was assessed according to GRADE.  
14  
15 47     ▪ There is a possible lack of evidence of newer RCTs, which have not been analysed by the  
16  
17 48     included meta-analyses.  
18  
19  
20  
21  
22  
23  
24  
25  
26  
27  
28  
29  
30  
31  
32  
33  
34  
35  
36  
37  
38  
39  
40  
41  
42  
43  
44  
45  
46  
47  
48  
49  
50  
51  
52  
53  
54  
55  
56  
57  
58  
59  
60

## 49 Introduction

50 Depression is one of the most prevalent psychiatric disorders, with about 25% of women and 12% of  
51 men suffering from at least one depressive episode during their lifetime.<sup>1-3</sup> According to the criteria  
52 for diagnosis recommended by the American Psychiatric Association (APA), depressive disorders can  
53 be distinguished by their degree of severity or duration and are also characterized by a high  
54 comorbidity and an increase of psychological strain for the affected person.<sup>4</sup> It is evident, that a  
55 strong comorbid connection to several chronic conditions like addictions,<sup>5</sup> neurodegenerative  
56 diseases,<sup>6,7</sup> or different psychiatric diseases<sup>8-11</sup> exists. This leads depressive disorders as one of the  
57 leading causes of disability worldwide.<sup>12</sup>

58 The most commonly used treatments for depression are antidepressants, psychotherapy, or a  
59 combination of drugs and psychotherapy. While both treatment strategies (alone and in  
60 combination) have been shown to be effective,<sup>13-15</sup> more recent meta-analyses also found high  
61 dropout and low remission rates<sup>16-21</sup> as well as clinically significant differences between  
62 antidepressant drugs and placebos only for patients at the upper end of the very severely depressed  
63 category.<sup>22</sup> This may lead patients to search for alternatives. Increasing mainstream use of  
64 complementary and alternative medicine (CAM) support this trend, particularly for different physical  
65 conditions with comorbid affective disorders.<sup>23-27</sup> The NIH defines CAM as therapeutic approaches  
66 that are usually not included in conventional Western medicine systems.<sup>28</sup> CAM therapies used in  
67 combination with conventional care are considered as complementary, those used instead of  
68 conventional care as alternative practices. Types of CAM approaches include natural products, such  
69 as herbs and dietary supplements (vitamins, minerals, and probiotics) and mind and body practices,  
70 such as yoga, chiropractic and osteopathic manipulation, meditation, relaxation, acupuncture, tai chi,  
71 qi gong, and hypnotherapy. Practices of traditional healers from Europe (naturopathy, homeopathy),  
72 Asia (Ayurveda, traditional Chinese medicine), and other continents are also classified as CAM.<sup>28</sup>  
73 While some complementary therapies have become a promising adjunct in the standard treatment  
74 of depression,<sup>29,30</sup> others are known for their possible side effects or interactions with standard  
75 drugs.<sup>30</sup> Recent clinical practice guidelines, in addition, vary widely in their search strategies and

1  
2 76 resulting recommendations for CAM treatments. While the ACP,<sup>31</sup> APA,<sup>32</sup> and CANMAT guideline<sup>33</sup>  
3  
4 77 provide a more comprehensive overview and critical appraisal of CAM treatments, the DGPPN,<sup>34</sup>  
5  
6 78 NICE,<sup>35</sup> and WFSBP<sup>36</sup> guidelines mainly focus on St. John's Wort and light therapy. Possible effects  
7  
8 79 and risks of further CAM therapies are not discussed. Thus, the purpose of this overview is to provide  
9  
10 a comprehensive search strategy of relevant CAM terms and systematically summarize the existing  
11  
12 level-1 evidence for clinical depression as a basis for further guideline recommendations on the  
13  
14 efficacy, effectiveness, and safety of CAM therapies.  
15  
16

### 18 83 **Methods**

19  
20 84 This systematic overview of reviews was conducted in accordance with the Preferred Reporting Items  
21  
22 for Systematic Reviews and Meta-Analyses (PRISMA) guidelines<sup>37 38</sup> and the recommendations of the  
23  
24 Cochrane Collaboration.<sup>39</sup> The protocol was not prospectively registered.  
25  
26

### 28 87 **Patient and Public Involvement**

29  
30 88 For this overview of reviews, patients or public were not involved.  
31  
32

### 33 89 **Inclusion and exclusion criteria**

- 34  
35 90 – Types of studies: To be eligible, articles had to be systematic reviews with meta-analyses of  
36  
37 91 randomized controlled clinical trials (RCTs) published in peer-reviewed journals. Conference  
38  
39 92 abstracts or unpublished work were excluded as well as reviews summarizing evidence  
40  
41 93 narratively. In cases of including same or similar original studies, only the review with the  
42  
43 94 most recent, most comprehensive search was included. When systematic reviews reported  
44  
45 95 results of RCTs as well as of designs of lower evidence levels, they were considered only if  
46  
47 96 separate meta-analyses for the included RCTs were performed.  
48  
49  
50  
51 97 – Types of participants: Only reviews of patients with a diagnosis of major depression or  
52  
53 98 dysthymia were eligible as well as reviews including patients/general population samples  
54  
55 99 with mild depressive symptoms above a clinical cut off or seasonal patterns. In contrast,  
56  
57 100 reviews studying depressive symptoms within specific subpopulations of substance-induced  
58  
59 101 or demented patients, secondary depression due to another medical condition (e.g. post-  
60  
102 stroke, cancer, or pain patients), bipolar disorders, or females with premenstrual dysphoric

1  
2 103 disorder or postpartum depression were excluded. Further restrictions regarding the  
3  
4 104 diagnostic criteria or procedures, regarding age, gender, duration of the condition, or  
5  
6 105 symptom intensity were not applied.  
7  
8  
9 106 – Types of interventions: Reviews investigating the effectiveness and/or safety of a single,  
10  
11 107 adjunctive or combined CAM treatment were included. For the classification of CAM  
12  
13 108 treatments the definition of the US National Institutes of Health<sup>40</sup> was followed. CAM  
14  
15 109 interventions have to be compared against treatment as usual (TAU)/waiting list,  
16  
17 110 placebo/sham, or standard medical care.  
18  
19  
20 111 – Types of outcomes: Reviews were eligible if they assessed at least one measure of  
21  
22 112 effectiveness such as severity of depressive symptoms, response rate (generally defined as a  
23  
24 113 50% decrease in depression scores after a period of up to 12 weeks of treatment),<sup>31</sup>  
25  
26 114 remission rate (generally defined as a period of up to 12 weeks during which a patient is  
27  
28 115 asymptomatic or has only few symptoms to a very mild degree).<sup>41</sup> relapse rates, and/or a  
29  
30 116 measure of safety such as number of adverse events (AE), drug interactions, or numbers  
31  
32 117 needed to harm for study withdrawal due to side effects.  
33  
34  
35

### 36 118 **Search strategy**

37  
38 119 Electronic literature was systematically searched via PubMed, PsycInfo and Central from their  
39  
40  
41 120 inception to January 31, 2018 without restrictions regarding time or language. Search terms for CAM  
42  
43 121 treatments were selected in accordance with Cochrane recommendations (Table 1).<sup>42</sup> Additional  
44  
45 122 manual search included reference lists of previously published reviews<sup>14 29 30 43</sup> and clinical practice  
46  
47 123 guidelines.<sup>31-36</sup> Using PubMed Informer,<sup>44</sup> the search was updated until June 30, 2018.  
48  
49

### 50 124 **Study selection process**

51  
52 125 To assess eligibility, articles were selected by screening titles and abstracts independently by two  
53  
54 126 authors (HH and DA). Any abstract considered potentially eligible by at least one author was read in  
55  
56 127 full to decide on its eligibility. Disagreements were rechecked with a third author (HC) until  
57  
58 128 consensus was achieved.  
59  
60

### 129 **Data extraction and quality assessment**

1  
2 130 Two authors (HH and DA) independently extracted data on the characteristics of the reviews  
3  
4 131 including the type of the intervention, the year of publication, the number and quality of the original  
5  
6 132 RCTs, the total number and age of the participants, and effectiveness and safety outcomes. The  
7  
8 133 quality of the included reviews was assessed using the Assessment of the Methodological Quality of  
9  
10 134 Systematic Reviews (AMSTAR) tool.<sup>45</sup> The AMSTAR tool consists of 11 items asking about important  
11  
12 135 methodological quality criteria of systematic reviews such as: a published apriori design, duplicate  
13  
14 136 study selection and data extraction, a comprehensive literature search including grey literature, a list  
15  
16 137 of included and excluded studies, summarized characteristics and quality assessment of included  
17  
18 138 studies, assessment of publication bias, appropriate method of data syntheses and deducing  
19  
20 139 conclusions, and a conflict of interests statement. AMSTAR has shown good construct validity and  
21  
22 140 inter-rater reliability. The Intraclass Correlation Coefficient (ICC) of the total AMSTAR score of 11  
23  
24 141 points was reported as 0.84.<sup>46</sup> For this analysis, the two authors (HH and DA) who independently  
25  
26 142 assessed AMSTAR reached an ICC of 0.96. Disagreements regarding content or quality of the reviews  
27  
28 143 were rechecked with a third author (HC) and resolved by agreement.  
29  
30  
31  
32  
33

#### 34 144 **Data synthesis**

35  
36 145 Results were pooled qualitatively by type of the intervention. Outcomes had to be calculated as  
37  
38 146 standard mean differences (SMDs), risk ratios (RRs), hazard ratios (HR), or odds ratios (ORs). If meta-  
39  
40 147 analyses displayed mean differences (MDs), SMDs were calculated using Review Manager Software  
41  
42 148 (RevMan, Version 5.3, The Nordic Cochrane Centre, Copenhagen) for better comparability of the  
43  
44 149 results. RevMan was also used to exclude SMDs/RRs/HRs/ORs of selective RCTs that did not fulfil  
45  
46 150 eligibility criteria of this overview. Effect sizes were classified according to Cohen as SMDs of 0.2 to  
47  
48 151 0.49 = small effect, SMDs of 0.5 – 0.79 = medium effect, and SMDs of > 0.8 = large effect (absolute  
49  
50 152 values)<sup>47</sup> with higher reduction of/improvement in depression scores represented by more negative  
51  
52 153 SMDs or RR/HR/ORs less than 1. According to the NICE guideline, a SMD of  $\geq 0.5$  or  $\leq -0.5$ ,  
53  
54 154 respectively was considered as a clinically relevant reduction of depression severity.<sup>48</sup> Statistical  
55  
56 155 heterogeneity between studies was assessed by the chi-squared test with a p-value of  $\leq .10$   
57  
58 156 indicating significant heterogeneity. The magnitude of heterogeneity was categorized by the  $I^2$   
59  
60

1  
2 157 statistic with  $I^2$  of 0 to 24% = no heterogeneity,  $I^2$  of 25% to 49% = moderate heterogeneity,  $I^2$  of 50%  
3  
4 158 to 74% = substantial heterogeneity, and  $I^2$  of 75% to 100% = considerable heterogeneity.<sup>39</sup>

## 159 **Quality of evidence**

160 The quality of evidence was assessed according to the Grades of Recommendation, Assessment,  
161 Development, and Evaluation (GRADE) approach<sup>49</sup> individually by two authors (HH and DA).  
162 Disagreements were rechecked with a third author (HC) until consensus was achieved. For each  
163 outcome, the evidence can be graded as high, moderate, low or very low. Evidence from RCTs is  
164 initially assessed as high, but can be downgraded by one level for serious or two levels for very  
165 serious limitations of the study quality (of both RCTs and meta-analyses), inconsistency of the results,  
166 indirectness of the evidence, imprecision of the results, and a potential risk of publication bias (as  
167 assessed by the included meta-analyses).<sup>49</sup>

## 168 **Results**

### 169 **Study selection**

170 A total of 3582 potentially eligible articles were identified by electronic database search. One  
171 additional review was retrieved from manual search,<sup>50</sup> one from the updated search until June  
172 2018.<sup>51</sup> After removing duplicates, 2639 articles were excluded by screening of titles and abstracts.  
173 The remaining 117 articles were read in full, of which further 91 reviews had to be excluded (Figure  
174 1). Reasons for exclusion comprised 55 reviews where newer and/or more comprehensive reviews  
175 on higher quality evidence were available.<sup>50-52-105</sup> Further 15 reviews have to be excluded as they  
176 systematically summarized evidence but did not performed a meta-analysis mostly due to clinical  
177 heterogeneity or a limited number of available RCTs.<sup>106-120</sup> Eight reviews were excluded as they  
178 included mixed depressive samples of bipolar or postpartum cases and did not provide (data for)  
179 subgroup analyses for patients with the defined depression criteria.<sup>121-128</sup> Another six reviews  
180 contained community samples with non-clinical depression or physically ill patients with comorbid  
181 depressive symptoms but displayed no data for patients with a primary diagnosis of depression.<sup>129-134</sup>  
182 Four reviews performed meta-analyses on both RCTs and non-RCTs and did not perform subgroup

1  
2 183 analyses or extracted sufficient data for post hoc analyses.<sup>135-138</sup> Three of the reviews analysed  
3  
4 184 standard instead of complementary therapies and were therefore be excluded. Finally, 26 meta-  
5  
6 185 analyses could be included and reviewed.<sup>51 139-163</sup>  
7  
8

## 9 186 **Review characteristics and quality**

10  
11  
12 187 Characteristics and quality appraisal of the included meta-analyses are summarized in the  
13  
14 188 Supplementary Table 1. Meta-analyses were conducted between 2002 and 2018 and included  
15  
16 189 between 1 to 49 RCTs on 40 to 7104 adult patients. Meta-analyses on children and adolescents were  
17  
18 190 not available or did not meet inclusion criteria. Samples mostly consisted of patients suffering from  
19  
20 191 major depressive disorder<sup>140-143 145-151 154 156 157 159 160</sup> but also included patients with mixed diagnoses  
21  
22 192 of non-seasonal depression,<sup>51 153 162 163</sup> patients with a diagnosis of seasonal depression,<sup>152</sup> and  
23  
24 193 patients with mild to severe symptoms of depression above a clinical cut-off.<sup>139 141 144 145 151 155 157 158</sup> All  
25  
26 194 but one meta-analysis<sup>141</sup> reported pooled outcomes based on common standardized questionnaires  
27  
28 195 or diagnostic interviews. Effects were analysed mostly up to 12 weeks of treatment (short-term),  
29  
30 196 except for four meta-analyses that included RCTs with effects reported up to 16, 24, or 32 weeks<sup>51 142</sup>  
31  
32 197 <sup>143 151 160</sup> and further three meta-analyses with long-term analyses equal to or greater than one year  
33  
34 198 <sup>149 157 163</sup>. The AMSTAR total scores of the included meta-analyses ranged between 4 and 11 points  
35  
36 199 with a median quality of 7 points. The individual AMSTAR-ratings are reported in the Supplementary  
37  
38  
39  
40  
41 200 Table 2.  
42  
43

## 44 201 **Synthesis of results**

### 46 202 ***Acupuncture***

#### 48 203 *Manual acupuncture*

49  
50  
51  
52  
53 204 A high-quality Cochrane review meta-analysed 49 RCTs in major depressed adults as well as those  
54  
55 205 with clinically relevant symptoms of depression for manual acupuncture.<sup>51</sup> For depression severity,  
56  
57 206 significant effect sizes were found in comparisons to TAU and as in adjunction to standard  
58  
59 207 antidepressants, while acupuncture showed similar effects to invasive sham acupuncture and  
60  
208 standard antidepressants (Figure 2). The analyses of remission rates did not reveal superiority of

1  
2 209 acupuncture in the comparisons to TAU, invasive sham, standard antidepressants or in adjunction to  
3  
4 210 standard antidepressants (Figure 3). Adverse events reported in the acupuncture groups were  
5  
6 211 significantly lower than in patients treated with antidepressant drugs. However, most meta-analyses  
7  
8 212 showed significant heterogeneity, a lack of RCTs with low risk of bias and a possibly serious risk of  
9  
10 213 publication bias. Thus, the quality of evidence had to be downgraded to low and very low.

#### 214 *Electroacupuncture*

215 For electroacupuncture, the same Cochrane review<sup>51</sup> revealed very low quality of evidence for the  
216 comparisons to TAU and invasive sham for both outcomes, severity (Figure 2) and remission (Figure  
217 3), because of serious limitations of the quality of the RCTs, imprecision, and a high risk of publication  
218 bias. For electroacupuncture monotherapy in comparison to standard antidepressants, low quality  
219 evidence homogeneously suggested significant greater effects for severity and similar effects for  
220 remission. As an adjunctive treatment to antidepressants, electroacupuncture effectiveness was  
221 supported by low quality of evidence showing a significant greater consistent and precise effect for  
222 depression severity. Although the mean adjunctive effect can be considered as large, the analysis  
223 based on only one RCT with overall low risk of bias and 4 RCTs of lower methodological quality that  
224 missed to include adjunctive sham acupuncture. For remission rates, very low quality of evidence  
225 suggested no effects in adjunction to antidepressants. In addition, one RCT showed significant less  
226 AEs when electroacupuncture was added to standard antidepressants.

#### 227 *Aromatherapy*

228 The literature search revealed no meta-analysis on aromatherapy. A recent systematic review  
229 detected no RCTs in patients with a primary diagnosis of depression. However, two out of five of the  
230 reviewed studies on inhalation aromatherapy and five out of eight studies on aromatherapy massage  
231 have found significant anti-depressive effects in mixed patient samples and healthy adults.<sup>117</sup>

#### 232 *Biofeedback*



1  
2 233 No meta-analysis on biofeedback was conducted to date. A recent systematic review revealed only  
3  
4 234 one RCT on the defined inclusion criteria for depression showing some effects in contrast to sham  
5  
6 235 psychotherapy.<sup>118</sup>  
7

## 9 236 **Herbs**

### 12 237 *St. John's wort (Hypericum perforatum)*

15 238 The effectiveness of St. John's wort was meta-analysed by a Cochrane review of 29 RCTs<sup>150</sup> and a  
16  
17 239 more recent, higher quality meta-analysis of 35 RCTs.<sup>142</sup> In comparison to placebo, St. John's wort  
18  
19 240 showed moderate quality evidence of significant greater reductions of depression severity (Figure 2)  
20  
21 241 and response rates (Figure 4). The evidence had to be downgraded due to significant heterogeneity  
22  
23 242 because of higher effects in studies from German-speaking countries than in those from the US or  
24  
25 243 other European countries. In contrast, very low quality of evidence suggested no superiority to  
26  
27 244 placebo for remission (Figure 3) and response rates (Figure 5). In comparison to standard  
28  
29 245 antidepressants, St. John's wort showed comparable severity reductions, response, remission, and  
30  
31 246 relapse rates. The quality of the evidence of the meta-analyses of severity and relapse rates had to  
32  
33 247 be downgraded to low and very low, respectively. The evidence of the response and remission rates  
34  
35 248 was considered as moderate quality showing the same results in both German and studies from  
36  
37 249 other countries but containing some RCTs with unclear risk of selection bias and detection bias.  
38  
39 250 Moreover, both meta-analyses<sup>142 150</sup> showed similar AEs of St. John's wort to placebo but significant  
40  
41 251 less AEs than standard antidepressants.  
42  
43  
44  
45  
46

### 47 252 *Saffron (Crocus sativus)*

50 253 A moderate-quality meta-analysis examined the effectiveness and safety of saffron on depression  
51  
52 254 severity by including 5 RCTs in adult patients with major depression.<sup>147</sup> It revealed very low quality of  
53  
54 255 evidence for significant greater effects versus placebo and similar effects versus antidepressant  
55  
56 256 medication up to 8 weeks of treatment (Figure 2). No serious adverse events were reported, but  
57  
58 257 patients receiving saffron tend to report more adverse events than those receiving placebo and less  
59  
60 258 adverse events than those receiving antidepressant medication. Reasons for downgrading the

1  
2 259 evidence included no replication of the results (all included RCTs were conducted by the same  
3  
4 260 research group), the small overall sample size, and the possibly high risk of publication bias.

#### 7 261 *Curcumin (Curcuma longa)*

8  
9  
10 262 For the intake of curcumin, a moderate-quality meta-analysis<sup>155</sup> revealed very low quality of evidence  
11  
12 263 suggesting a small but significant short-term effect of low heterogeneity on depression severity by  
13  
14 264 pooling 6 RCTs (Figure 2). No serious adverse events were recorded. Evidence had to be downgraded  
15  
16 265 due to unclear risk of selection, performance, detection, attrition, and reporting bias in over the half  
17  
18 266 of the included RCTs, the imprecision of the pooled effect and the possibly high risk of publication  
19  
20  
21 267 bias.

#### 24 268 *Traditional Chinese herbs*

25  
26  
27 269 A comprehensive but low-quality systematic review of 296 RCTs of *Chinese herbal medicine* formulas  
28  
29 270 and single herbs<sup>162</sup> revealed 21 RCTs of mostly unclear to high risk of selection, performance, and  
30  
31 271 detection bias and a serious risk of publication bias. Therefore, the evidence supporting the superiority  
32  
33 272 above placebo and the similarity towards standard antidepressants regarding depression severity  
34  
35 273 (Figure 2) and response rates (Figure 4) was assessed as very low.

#### 39 274 *Other herbs*

40  
41  
42 275 For other than the described herbs, no meta-analyses were conducted to date. However, a  
43  
44 276 systematic review<sup>110</sup> found three single RCTs that showed significant improvement in depressive  
45  
46 277 symptoms for *Lavandula angustifolia* as an adjunctive treatment to standard antidepressant drugs  
47  
48 278 versus antidepressant drugs alone and for *Echium amoenum* and *Rhodiola rosea* versus placebo. No  
49  
50  
51 279 serious adverse events were reported.

#### 53 280 *Homoeopathy*

54  
55  
56 281 No meta-analysis on *homoeopathic remedies* for depression were conducted yet. A recent systematic  
57  
58 282 review detected no placebo-controlled RCTs in patients with a primary diagnosis of depression.<sup>129</sup>

#### 59 283 *Hypnosis*

1  
2 284 No meta-analysis on *hypnosis* or *self-hypnosis* techniques met the inclusion criteria of this overview.  
3  
4 285 The only available review on this topic<sup>127</sup> included 6 RCTs among which only one RCT included adults  
5  
6 286 with mild primary depression. Within the mixed sample of physically ill patients and healthy adults,  
7  
8 287 (self-)hypnosis appeared to be effective in decreasing depressive symptoms.

### 11 288 **Light therapy**

14 289 A high-quality Cochrane review meta-analysed the effects of *bright light therapy* in adjunction to  
15  
16 290 standard antidepressants versus sham light therapy plus antidepressants on severity and response  
17  
18 291 rates in patients suffering from non-seasonal depression.<sup>161</sup> By pooling 18 RCTs of overall unclear risk  
19  
20 292 of bias, it revealed very low quality of evidence for a significant small but inconsistent and imprecise  
21  
22 293 effect on depression severity (Figure 2). A subgroup analysis of two RCTs with low risk of selection  
23  
24 294 bias and detection bias revealed a significant large effect on depression severity but based on one  
25  
26 295 non-peer-reviewed publication and one RCT that also included bipolar patients. Response rates did  
27  
28 296 not significantly differ between groups (Figure 4). Adverse events were reported non-systematically  
29  
30 297 but appeared to be comparable to sham light therapy except for hypomania that occurred more  
31  
32 298 often under verum light therapy.<sup>161</sup>

34  
35  
36  
37 299 For patients with seasonal patterns of depression, a meta-analysis of 8 RCTs<sup>152</sup> revealed very low  
38  
39 300 quality of evidence for a significant medium effect on depression severity of light monotherapy in  
40  
41 301 comparison to sham light therapy (Figure 2). Risk of bias of individual RCTs, heterogeneity, and safety  
42  
43 302 were not analysed leading to an overall low quality of the meta-analysis and downgrading of the  
44  
45 303 evidence.

### 48 49 304 **Massage therapy**

51  
52 305 The literature search detected no meta-analysis of *massage therapy* in patients with a primary  
53  
54 306 depression. However, massage therapy appeared to be effective in decreasing depressive symptoms  
55  
56 307 in mixed samples of physically ill patients and healthy adult.<sup>133</sup> Future research will show, whether  
57  
58 308 these results may be transferable to primary depressed cases.

### 59 309 **Meditative movement therapies**

1  
2 310 *Dance therapy*  
3

4  
5 311 Short-term effects of improvisatory or structured *dance therapy* as a combination of movement-  
6  
7 312 based work, interactive group components and insight/expressive methods were meta-analysed by a  
8  
9 313 Cochrane review of high methodological quality.<sup>153</sup> It revealed a significant large pooled effect size  
10  
11 314 for depression severity as an adjunctive treatment option to standard medical/psychotherapeutic  
12  
13 315 care based on two RCTs (Figure 2). Although the meta-analyses contained no heterogeneity and no  
14  
15 316 imprecise CI, the evidence had to be downgraded because of mostly unclear/high risk of bias of one  
16  
17 317 of the RCTs as well as the overall small sample size.  
18  
19

20  
21 318 *Chinese movement therapies*  
22

23  
24 319 A low-quality meta-analysis on Chinese meditative movement therapies revealed 30 RCTs, of which 2  
25  
26 320 RCTs on *Qi Gong* and 3 RCTs on *Tai Chi* met inclusion criteria for patients with mild to severe  
27  
28 321 symptoms of primary depression.<sup>151</sup> Very low quality of evidence suggested significant short-term  
29  
30 322 effects for *Qi Gong* but not for *Tai Chi* in comparison to TAU. The evidence had to be downgraded  
31  
32 323 due to very serious limitations of the quality of the RCTs and the meta-analysis, significant  
33  
34 324 heterogeneity, imprecision, and a possible high risk of publication bias.  
35  
36

37  
38 325 *Yoga*  
39

40  
41 326 A high-quality meta-analysis of complex *yoga* interventions for various depressive disorders found 12  
42  
43 327 RCTs,<sup>145</sup> of which 5 RCTs of mostly unclear risk of bias met the inclusion criteria of this overview. The  
44  
45 328 pooled short-term effect on depression severity was of large size in comparison to TAU and medium  
46  
47 329 size in comparison to standard exercises (Figure 2). However, the evidence was assessed as very low  
48  
49 330 due to serious limitations of quality of the RCTs, significant heterogeneity, imprecision, and a possible  
50  
51 331 high risk of publication bias.  
52  
53

54  
55 332 A further systematic review of *yoga* in major depressive disorder, revealed 5 newer *yoga* RCTs but did  
56  
57 333 not perform a meta-analysis because of high clinical heterogeneity. Risk of bias was comparably high  
58  
59 334 and evidence mostly conflicting.<sup>107</sup>  
60

335 ***Mindfulness-based interventions***

1  
2 336 *Mindfulness-based Cognitive Therapy (MBCT)*

3  
4  
5 337 A low-quality meta-analysis of mindfulness-based interventions in patients with major depression

6  
7 338 found 4 RCTs investigating the effects of MBCT and Cognitive Behavioural Therapy (CBT) on depression

8  
9 339 severity.<sup>159</sup> It revealed a significant large short-term effect of MBCT in comparison to TAU and similar

10  
11 340 effects in comparison to CBT (Figure 2). However, the quality of the evidence was considered as very

12  
13 341 low due to the missing risk of bias assessment, inconsistency, and imprecision.

14  
15  
16 342 A further moderate-quality systematic review on MBCT meta-analysed 9 RCTs on an individual patient

17  
18 343 data level.<sup>149</sup> The sample consisted of patients with recurrent major depression currently in remission.

19  
20 344 After a period of 60 weeks, MBCT showed a significantly reduced risk of depressive relapse compared

21  
22 345 to those receiving antidepressant drugs (Figure 5). No serious adverse events were reported. The

23  
24 346 evidence was assessed as moderate due to a possibly serious risk of publication bias.

25  
26  
27  
28 347 *Mindfulness-based stress reduction (MBSR)*

29  
30  
31 348 RCTs of MBSR and MBSR-like interventions were meta-analysed by a recent review<sup>144</sup> showing a

32  
33 349 significant large short-term effect on depression severity in comparison to TAU and enhanced TAU

34  
35 350 (Figure 2). The quality of the evidence was assessed as low because of the overall unclear risk of

36  
37 351 selection and performance bias and significant heterogeneity.

38  
39  
40  
41 352 *Music therapy*

42  
43  
44 353 Studies on active and receptive *music therapy* in older patients with a diagnosis of depression were

45  
46 354 summarized by a recent moderate-quality meta-analysis.<sup>163</sup> Out of 19 RCTs, 8 met the inclusion

47  
48 355 criteria for this overview. Pooled analyses of 5 of them revealed a significant medium effect size on

49  
50 356 depression severity against TAU up to 52 weeks, however with bigger short-term than long-term

51  
52 357 effects, considerable heterogeneity and overall unclear risk of selection, performance and detection

53  
54 358 bias resulting in very low quality of evidence. Further 3 RCTs of the same review revealed low quality

55  
56 359 evidence for a significant large consistent and precise effect of music therapy as an adjunctive

57  
58  
59 360 treatment to antidepressants (Figure 2).

1  
2 361 A newer Cochrane review<sup>139</sup> found 8 different RCTs showing a significant large pooled effect of music  
3  
4 362 therapy on depression severity against TAU and similar effects as CBT (Figure 2). However, both  
5  
6 363 analyses revealed very low quality of evidence due to mostly unclear selection, performance,  
7  
8 364 detection and reporting bias, significant heterogeneity, and imprecision.

### 11 365 ***Nutrition therapy***

14 366 No meta-analyses on specific diets for patients with depression were published to date. A systematic  
15  
16 367 review of 11 RCTs on whole-diet interventions in mostly healthy patients with subthreshold physical  
17  
18 368 conditions revealed conflicting evidence on the effectiveness of those intervention for the reduction  
19  
20 369 of depressive symptoms.<sup>115</sup>

24 370 A further systematic review on fasting in patients with chronic pain and inflammatory diseases<sup>111</sup>  
25  
26 371 included 1 RCT and 7 observational studies, which showed promising short-term but questionable  
27  
28 372 longer-term anti-depressive effects.

### 31 373 ***Religious/spiritual Interventions***

34 374 Very low to low quality of evidence was found by a moderate-quality systematic review of 9 RCTs on  
35  
36 375 Christian, Muslim, and spiritual CBT adaptations.<sup>141</sup> The analyses showed significant greater medium  
37  
38 376 effects on depression severity against TAU and standard CBT (Figure 2). Safety data were not  
39  
40 377 reported.

### 44 378 ***Supplements***

#### 47 379 *Inositol*

50 380 A low quality meta-analysis of 2 RCTs in patients with major depression<sup>154</sup> revealed very low quality  
51  
52 381 evidence for inositol as adjective to standard antidepressants versus placebo in combination to standard  
53  
54 382 antidepressants (Figure 2).

#### 57 383 *Magnesium*

59 384 No meta-analysis of magnesium supplementation was found. A recent systematic review detected no  
60  
385 RCTs in patients with a primary diagnosis of depression<sup>108</sup>.

1  
2 386 *Omega-3 fatty acids*  
3

4  
5 387 A high-quality Cochrane review<sup>143</sup> of 26 RCTs found conflicting evidence of the effectiveness of  
6  
7 388 supplementation with omega-3 fatty acids versus placebo in patients with major depression as  
8  
9 389 depression severity significantly improved while response and remission rates did not so (Figure 2-4).  
10  
11 390 One additional RCT with a very low sample size showed similar effects of omega-3 fatty acids on  
12  
13 391 severity and response rates in comparison to antidepressant drug treatment (Figure 2 and 4).  
14  
15 392 However, all meta-analyses were based on very low quality of evidence because of limitations of the  
16  
17 393 study quality, significant heterogeneity, imprecision and a possibly high risk of publication bias.  
18  
19

20  
21 394 *Probiotics*  
22

23  
24 395 The effectiveness of the supplementation with probiotics on depression severity was analysed by a  
25  
26 396 moderate-quality meta-analysis of 5 RCTs, of which only one RCT with overall low risk of bias was  
27  
28 397 carried out on patients with major depression.<sup>148</sup> The analysis of the RCT revealed a significant  
29  
30 398 medium but imprecise short-term effect in comparison to placebo (Figure 2). This led to overall very  
31  
32 399 low quality of evidence for probiotics supplementation.  
33  
34

35  
36 400 *S-adenosyl methionine (SAME)*  
37

38  
39 401 A high-quality Cochrane review<sup>146</sup> of the effectiveness and safety of SAME supplementation on  
40  
41 402 depression severity revealed 2 RCTs of low risk of bias that showed no significant pooled effects for  
42  
43 403 SAME monotherapy versus placebo. One RCT, also of low risk of bias showed a significant medium  
44  
45 404 short-term effect as adjunctive to standard antidepressant medication, both for depression severity.  
46  
47 405 Further 5 RCTs, which were rated as having overall unclear risk of bias, showed similar pooled effects  
48  
49 406 of SAME monotherapy on depression severity compared to standard antidepressant medication  
50  
51 407 (Figure 2). Original RCTs reported safety issues insufficiently. For all meta-analyses, the evidence was  
52  
53 408 assessed as low to very low quality because of limitations of the study quality, heterogeneity,  
54  
55 409 imprecision, and a possibly high risk of publication bias.  
56  
57

58  
59 410 *Tryptophan*  
60

1  
2 411 A moderate-quality Cochrane review found 2 RCTs investigating the effectiveness and safety of  
3  
4 412 tryptophan supplementation on depression severity.<sup>158</sup> Pooling the effects led to significant greater  
5  
6 413 short-term response rates (Figure 4) as well as significant more adverse events in the tryptophan  
7  
8 414 group than in the placebo group. The evidence was assessed as very low quality because of an  
9  
10 415 unclear risk of detection, attrition and other bias, imprecision, and a possible risk for publication bias.

#### 13 416 *Vitamins*

16 417 For Vitamin B6, no meta-analysis was available. A systematic review without meta-analysis revealed  
18 418 2 RCTs showing no significant effects when compared to placebo.<sup>120</sup>

21 419 Two further moderate to high-quality meta-analyses examined the effects of vitamin B9 (Folate) for  
23 420 major depressive patients. While a Cochrane review<sup>160</sup> calculated a significant medium effect size of  
25 421 folate-intake as an adjunctive intervention to standard drug treatment on depression severity, a  
27 422 more recent review<sup>140</sup> revealed non-significant differences on severity and response rates (Figure 2  
30 423 and 3). In contrast, a long-term combined intake of Vitamin B6, B9, and B12 was found to be  
32 424 effective for relapse prevention after remission of symptoms as a result of one RCT (Figure 5).<sup>140</sup>  
35 425 However, all comparisons were based on very low quality of evidence mostly due to significant  
37 426 heterogeneity, imprecision, and possible high risk of publication bias.

40 427 Another moderate-quality meta-analysis revealed evidence of the effectiveness of vitamin D-intake  
42 428 on depression severity in comparison to placebo.<sup>157</sup> The analysis of the two included RCTs revealed a  
44 429 significant medium short-term effect in favour of vitamin D in major depressed patients up to 8  
46 430 weeks (Figure 2). The quality of evidence was rated as very low due to limitations of the study  
48 431 quality, missing values of heterogeneity, imprecision, a high risk of publication bias as well as  
50 432 insufficient reporting of adverse events.

#### 54 433 *Zinc*

57 434 The effectiveness of zinc for major depression was meta-analysed by a low-quality review of 3  
59 435 RCTs.<sup>156</sup> It revealed a significant pooled short-term effect of medium size and low heterogeneity  
436 436 when zinc was taken as an adjunctive to standard antidepressant drug treatment (Figure 2).



1  
2 437 However, the available evidence had to be assessed as very low as the meta-analysis did not perform  
3  
4 438 risk of bias assessments and did not report adverse events.  
5  
6  
7

## 8 439 **Discussion**

9  
10 440 This systematic review provided a comprehensive overview of the evidence of CAM treatments for  
11  
12 441 patients with a diagnosis or clinical symptoms of depression. Moderate quality evidence suggested  
13  
14 442 the efficacy, comparative effectiveness to standard antidepressants, and safety of St. John's wort on  
15  
16 443 depression severity and response rates. For remission and relapse rates, the evidence was conflicting  
17  
18 444 and of lower quality. Moreover, moderate quality evidence showed that MBCT was superior to  
19  
20 445 standard antidepressant drug treatment for the prevention of depression relapse in patients with  
21  
22 446 recurrent major depression. Low quality evidence suggested significant greater effects in favour of  
23  
24 447 electroacupuncture in comparison to standard antidepressants alone and in adjunction to standard  
25  
26 448 antidepressants for depression severity. For remission rates, low quality evidence revealed  
27  
28 449 comparable effects of electroacupuncture and standard antidepressants. Further significant greater  
29  
30 450 effects, which based on low quality evidence, were found for MBSR versus TAU, music therapy in  
31  
32 451 adjunction to standard antidepressants, faith-adapted CBT versus CBT, and SAME versus standard  
33  
34 452 antidepressants. Other treatments such as manual acupuncture, aromatherapy, biofeedback, herbs  
35  
36 453 (crocus sativus, curcuma longa, traditional Chinese herbs, lavandula angustifolia, echium amoenum,  
37  
38 454 rhodiola rosea), Homoeopathy, hypnosis, bright light therapy, massage, meditative movement  
39  
40 455 therapies (dance therapy, Qi Gong, Tai Chi, yoga), whole-diet interventions, fasting, and  
41  
42 456 supplementation with inositol, magnesium, omega-3 fatty acids, probiotics, tryptophan, B- and D-  
43  
44 457 vitamins, and zinc were based on very low quality of evidence or no level-1 evidence.  
45  
46  
47  
48  
49

50  
51 458 The strengths of the review process included the comprehensive literature search based on a  
52  
53 459 structured list of CAM specific topics, which had been operationalized for the Cochrane  
54  
55 460 Collaboration.<sup>42</sup> It therefore included evidence for more than the previously considered CAM  
56  
57 461 approaches and provided systematic information where further high-quality studies are required. In  
58  
59 462 addition, we only included results of RCTs of patients with a diagnosis of depression or clinical  
60  
463 relevant depressive symptoms and excluded RCTs on samples with minor or secondary symptoms of

1  
2 464 depression by newly calculating effect sizes. Finally, we rated AMSTAR and considered the quality of  
3  
4 465 the meta-analyses as well when grading the quality of the evidence.  
5  
6

7 466 The conclusions derived from this overview are limited due to possibly missing evidence from newer  
8  
9 467 RCTs, which have not been summarized by the included systematic reviews and meta-analyses. As it  
10  
11 468 was not within the scope of this overview, we did not separately search for individual RCTs. We also  
12  
13 469 did not include meta-analyses on studies of lower evidence levels, which may include bigger samples  
14  
15 470 and may provide additional information about further possible treatment approaches. Moreover, we  
16  
17 471 did not search online registries or conference proceedings for unpublished or ongoing meta-analyses,  
18  
19 472 which may limit the conclusions. Another reason that limits the quality of evidence consists in the  
20  
21 473 unsatisfactory methodological quality of some of the included meta-analyses. Although the  
22  
23 474 methodological quality of the original RCTs might be acceptable, the bad reporting of some meta-  
24  
25 475 analyses led to downgraded evidence. In particular, meta-analyses often missed to search for grey  
26  
27 476 literature, cite excluded studies, adequately assess risk of bias of the original studies, and report  
28  
29 477 complete  $I^2$  statistics. As the latter are known to be unstable in meta-analyses with a small numbers  
30  
31 478 of studies,<sup>164</sup> calculating confidence intervals for  $I^2$  should be standard. Moreover, RCTs as well as  
32  
33 479 meta-analyses often missed to systematically report on occurred adverse events, which also limits  
34  
35 480 the significance of the conclusions. In RCTs of non-pharmacological interventions, there is always a  
36  
37 481 high or unclear risk of performance bias and possibly high placebo effects. As such, adding credible  
38  
39 482 sham interventions, controlling for patients' expectancies, and performing of ITT analyses is  
40  
41 483 indispensable. However, meta-analyses mostly did not systematically assess these issues. In meta-  
42  
43 484 analyses of pharmacological interventions, the influence of industrial funding sources was often not  
44  
45 485 adequately analysed. Here, subgroup analyses of studies having received no funding/non-industrial  
46  
47 486 funding versus those having received industrial funding are needed. Results of meta-analyses that  
48  
49 487 missed to report funding issues completely should interpreted with caution. In general, it should be  
50  
51 488 noticed that all evidence is based on short-term pooled effects, except for meta-analyses of St. John's  
52  
53 489 wort, MBCT, music therapy, and B- and D-vitamins that also provided longer-term follow-up data.  
54  
55  
56  
57  
58  
59  
60

1  
2 490 Clinical recommendations for patients should follow the country-specific clinical practice guidelines  
3  
4 491 considering the quality of evidence, the accessibility of the treatment, costs, and the preferences of  
5  
6 492 the patients. While the guidelines agree<sup>31 32 34-36 165 166</sup> that clinicians should select between either CBT  
7  
8 493 or second-generation antidepressant drugs for the treatment of major depression, the restricted  
9  
10 494 search strategy of some of the guidelines might limit their recommendations for CAM treatments.  
11  
12  
13 495 For patients who do reject or do not tolerate standard antidepressant drugs, one alternative  
14  
15 496 treatment option may be St. John's wort. It is also recommended by the American Psychiatric  
16  
17 497 Association Task Force report<sup>43</sup> and the CANMAT Depression Work Group<sup>33</sup> as being proven  
18  
19 498 sufficiently for the short-term by placebo-controlled and equivalence trials with standard  
20  
21 499 antidepressants for mild to moderate major depression. Particularly for bridging the gap between  
22  
23 500 diagnosis and getting access to psychotherapy and meanwhile reducing/not-worsening depression  
24  
25 501 severity, St. John's wort may be considered as a possibly better tolerated alternative to standard  
26  
27 502 antidepressant drugs.<sup>167</sup> As St. John's wort is accessible without prescription and currently not  
28  
29 503 regulated by the US Food and Drug Administration, we agree with the ACP guidelines<sup>31</sup> that it  
30  
31 504 remains difficult for patients to obtain quality-controlled remedies. Moreover, St. John's wort is  
32  
33 505 associated with numerous herb-to-drug interactions.<sup>168</sup> Therefore, we would recommend clinicians  
34  
35 506 to educate their patients about possible effects, side effects and interactions who in turn should not  
36  
37 507 take St. John's wort without professional advise.<sup>34</sup> Despite those limitations, we would not  
38  
39 508 discourage a general therapeutic attempt with St. John's wort, even if we disagree with the NICE  
40  
41 509 guideline in this point.<sup>35</sup> Clinicians may also inform patients with recurrent major depression  
42  
43 510 currently in remission about the superiority of MBCT in comparison to standard antidepressants for  
44  
45 511 relapse prevention.<sup>32-35</sup> Finally, patients should also be informed that many other CAM treatments  
46  
47 512 might show promising effects but cannot be recommended until further higher-quality studies will  
48  
49 513 confirm their effectiveness and safety.  
50  
51  
52  
53  
54  
55  
56 514 Further research is needed, particularly for interventions that have shown preliminary evidence for  
57  
58 515 reducing secondary symptoms of depression, promising short-term but no longer-term effects, or  
59  
60 516 insufficient evidence due to low methodological quality of the original RCTs and/or the performed

1  
2 517 meta-analyses. Reporting of clinical trials and meta-analyses should necessarily follow the  
3  
4 518 CONSORT<sup>169</sup> and PRISMA guidelines,<sup>37</sup> respectively, including rigorous documentation and analysis of  
5  
6 519 adverse events. Especially Chinese and Indian trials are still found to be poorly reported and tended  
7  
8 520 to present more positive conclusions than those from western countries.<sup>170 171</sup> Moreover, 7 of the  
9  
10 521 included meta-analyses showed no more than poor methodological quality. All were published in  
11  
12 522 peer-reviewed journals in the past 5 years. One complementary journal is among them, while 6 of  
13  
14 523 the journals are conventional psychiatric journals with impact factors ranging from 2.419 to 4.369.  
15  
16 524 Thus, particularly the review process as well as the editorial work need to be improved. Further  
17  
18 525 clinical practice guidelines should extend their search strategies and include standard search terms  
19  
20 526 for CAM. This is also important for CAM therapies that do not show consistent evidence or that are  
21  
22 527 not yet investigated. This information might be equally interesting for physicians as well as for  
23  
24 528 patients to make an informed decision about the treatment for clinical depression.  
25  
26  
27  
28

## 29 529 **Conclusion**

30  
31 530 This overview of systematic reviews on CAM treatments for clinical depression aimed to provide a  
32  
33 531 systematic search strategy and evidence base, on which further clinical practice guidelines may build  
34  
35 532 their recommendations. To improve quality of trials and meta-analyses, researchers, reviewers as  
36  
37 533 well as editors are asked to ensure that future articles strictly adhere the CONSORT and PRISMA  
38  
39 534 guidelines.  
40  
41  
42  
43  
44  
45  
46  
47  
48  
49  
50  
51  
52  
53  
54  
55  
56  
57  
58  
59  
60

1  
2 535 **Acknowledgements**

3  
4 536 None.

5  
6  
7 537 **Funding**

8  
9 538 This research received no specific grant from any funding agency in the public, commercial or not-  
10  
11 539 for-profit sectors.

12  
13  
14 540 **Competing interests**

15  
16 541 The authors declare no competing interests. The authors have no financial or non-financial  
17  
18 542 association that might create a conflict of interest regarding the submitted manuscript.

19  
20  
21  
22 543 **Author contribution statement**

23  
24 544 HH was responsible for the conception and design of the study, the collection and analysis of the  
25  
26 545 study data and for drafting the manuscript. DA participated in the analysis of the study data and  
27  
28 546 drafting the manuscript. HC participated in the conception and design of the study and the analysis  
29  
30 547 of the study data, and critically revised the manuscript. GD participated in the conception and design  
31  
32 548 of the study, and critically revised the manuscript. All authors approved the final manuscript.

33  
34  
35  
36 549 **Data Availability**

37  
38  
39 550 All data relevant to the study are included in the article or uploaded as supplementary information.  
40  
41  
42  
43  
44  
45  
46  
47  
48  
49  
50  
51  
52  
53  
54  
55  
56  
57  
58  
59  
60

1  
2 551 **References**  
3  
4

- 5 552 1. Kessler RC, Berglund P, Demler O, et al. The epidemiology of major depressive disorder: results  
6 553 from the National Comorbidity Survey Replication (NCS-R). *Jama* 2003;289(23):3095-105.  
7 554 doi: 10.1001/jama.289.23.3095
- 8 555 2. Moussavi S, Chatterji S, Verdes E, et al. Depression, chronic diseases, and decrements in health:  
9 556 results from the World Health Surveys. *Lancet* 2007;370(9590):851-8. doi: 10.1016/S0140-  
10 557 6736(07)61415-9
- 11 558 3. Rubio JM, Markowitz JC, Alegria A, et al. Epidemiology of chronic and nonchronic major depressive  
12 559 disorder: results from the national epidemiologic survey on alcohol and related conditions.  
13 560 *Depress Anxiety* 2011;28(8):622-31. doi: 10.1002/da.20864
- 14 561 4. American Psychiatric Association. Diagnostic and statistical manual of mental disorders, fifth  
15 562 edition (DSM-5). Arlington: American Psychiatric Publishing 2013.
- 16 563 5. Lai HM, Cleary M, Sitharthan T, et al. Prevalence of comorbid substance use, anxiety and mood  
17 564 disorders in epidemiological surveys, 1990-2014: A systematic review and meta-analysis.  
18 565 *Drug Alcohol Depend* 2015;154:1-13. doi: 10.1016/j.drugalcdep.2015.05.031
- 19 566 6. Herbert J, Lucassen PJ. Depression as a risk factor for Alzheimer's disease: Genes, steroids,  
20 567 cytokines and neurogenesis - What do we need to know? *Front Neuroendocrinol*  
21 568 2016;41:153-71. doi: 10.1016/j.yfrne.2015.12.001
- 22 569 7. Riccelli R, Passamonti L, Cerasa A, et al. Individual differences in depression are associated with  
23 570 abnormal function of the limbic system in multiple sclerosis patients. *Mult Scler*  
24 571 2016;22(8):1094-105. doi: 10.1177/1352458515606987
- 25 572 8. Azar M, Pruessner M, Baer LH, et al. A study on negative and depressive symptom prevalence in  
26 573 individuals at ultra-high risk for psychosis. *Early Interv Psychiatry* 2016 doi:  
27 574 10.1111/eip.12386
- 28 575 9. Chechko N, Kellermann T, Augustin M, et al. Disorder-specific characteristics of borderline  
29 576 personality disorder with co-occurring depression and its comparison with major depression:  
30 577 An fMRI study with emotional interference task. *Neuroimage Clin* 2016;12:517-25. doi:  
31 578 10.1016/j.nicl.2016.08.015
- 32 579 10. Chen MH, Pan TL, Hsu JW, et al. Attention-deficit hyperactivity disorder comorbidity and  
33 580 antidepressant resistance among patients with major depression: A nationwide longitudinal  
34 581 study. *Eur Neuropsychopharmacol* 2016;26(11):1760-67. doi:  
35 582 10.1016/j.euroneuro.2016.09.369
- 36 583 11. Ronconi JM, Shiner B, Watts BV. A Meta-Analysis of Depressive Symptom Outcomes in  
37 584 Randomized, Controlled Trials for PTSD. *J Nerv Ment Dis* 2015;203(7):522-9. doi:  
38 585 10.1097/NMD.0000000000000322
- 39 586 12. Global Burden of Disease Study Collaborators. Global, regional, and national incidence,  
40 587 prevalence, and years lived with disability for 301 acute and chronic diseases and injuries in  
41 588 188 countries, 1990-2013: a systematic analysis for the Global Burden of Disease Study 2013.  
42 589 *Lancet* 2015;386(9995):743-800. doi: 10.1016/S0140-6736(15)60692-4
- 43 590 13. Cuijpers P, van Straten A, Andersson G, et al. Psychotherapy for depression in adults: a meta-  
44 591 analysis of comparative outcome studies. *J Consult Clin Psychol* 2008;76(6):909-22. doi:  
45 592 10.1037/a0013075
- 46 593 14. Gartlehner G, Wagner G, Matyas N, et al. Pharmacological and non-pharmacological treatments  
47 594 for major depressive disorder: review of systematic reviews. *BMJ Open* 2017;7(6):e014912.  
48 595 doi: 10.1136/bmjopen-2016-014912
- 49 596 15. Cipriani A, Furukawa TA, Salanti G, et al. Comparative efficacy and acceptability of 21  
50 597 antidepressant drugs for the acute treatment of adults with major depressive disorder: a  
51 598 systematic review and network meta-analysis. *The Lancet* 2018;391(10128):1357-66. doi:  
52 599 10.1016/S0140-6736(17)32802-7
- 53 600 16. Mathew SJ, Charney DS. Publication bias and the efficacy of antidepressants. *Am J Psychiatry*  
54 601 2009;166(2):140-5. doi: 10.1176/appi.ajp.2008.08071102
- 55 602 17. Pigott HE, Leventhal AM, Alter GS, et al. Efficacy and effectiveness of antidepressants: current  
56 603 status of research. *Psychother Psychosom* 2010;79(5):267-79. doi: 10.1159/000318293

- 1  
2 604 18. Rief W, Nestoriuc Y, Weiss S, et al. Meta-analysis of the placebo response in antidepressant trials.  
3 605 *J Affect Disord* 2009;118(1-3):1-8. doi: 10.1016/j.jad.2009.01.029
- 4 606 19. Turner EH, Matthews AM, Linardatos E, et al. Selective publication of antidepressant trials and its  
5 607 influence on apparent efficacy. *N Engl J Med* 2008;358(3):252-60. doi:  
6 608 10.1056/NEJMsa065779
- 7 609 20. Forneris CA, Nussbaumer B, Kaminski-Hartenthaler A, et al. Psychological therapies for preventing  
8 610 seasonal affective disorder. *Cochrane Database Syst Rev* 2015(11):CD011270. doi:  
9 611 10.1002/14651858.CD011270.pub2
- 10 612 21. Gartlehner G, Nussbaumer B, Gaynes BN, et al. Second-generation antidepressants for preventing  
11 613 seasonal affective disorder in adults. *Cochrane Database Syst Rev* 2015(11):CD011268. doi:  
12 614 10.1002/14651858.CD011268.pub2
- 13 615 22. Kirsch I, Deacon BJ, Huedo-Medina TB, et al. Initial severity and antidepressant benefits: a meta-  
14 616 analysis of data submitted to the Food and Drug Administration. *PLoS Med* 2008;5(2):e45.  
15 617 doi: 10.1371/journal.pmed.0050045
- 16 618 23. Costanian C, Christensen RAG, Edgell H, et al. Factors associated with complementary and  
17 619 alternative medicine use among women at midlife. *Climacteric* 2017;20(5):421-26. doi:  
18 620 10.1080/13697137.2017.1346072
- 19 621 24. Henson JB, Brown CL, Chow S-C, et al. Complementary and Alternative Medicine Use in United  
20 622 States Adults With Liver Disease. *J Clin Gastroenterol* 2017;51(6):564-70. doi:  
21 623 10.1097/mcg.0000000000000617
- 22 624 25. Rhee TG, Westberg SM, Harris IM. Complementary and Alternative Medicine in U.S. Adults with  
23 625 Diabetes: Reasons for Use and Perceived Benefits. *J Diabetes* 2017 doi: 10.1111/1753-  
24 626 0407.12607
- 25 627 26. Zhang Y, Dennis JA, Leach MJ, et al. Complementary and Alternative Medicine Use Among US  
26 628 Adults With Headache or Migraine: Results from the 2012 National Health Interview Survey.  
27 629 *Headache* 2017;57(8):1228-42. doi: 10.1111/head.13148
- 28 630 27. Bahall M. Prevalence, patterns, and perceived value of complementary and alternative medicine  
29 631 among cancer patients: a cross-sectional, descriptive study. *BMC Complement Altern Med*  
30 632 2017;17(1):345. doi: 10.1186/s12906-017-1853-6
- 31 633 28. NCCIH. Complementary, Alternative, or Integrative Health: What's In a Name? 2018 [Available  
32 634 from: <https://nccih.nih.gov/health/integrative-health> accessed 2019.06.18.
- 33 635 29. Luberto CM, White C, Sears RW, et al. Integrative medicine for treating depression: an update on  
34 636 the latest evidence. *Curr Psychiatry Rep* 2013;15(9):391. doi: 10.1007/s11920-013-0391-2
- 35 637 30. Ravindran AV, da Silva TL. Complementary and alternative therapies as add-on to  
36 638 pharmacotherapy for mood and anxiety disorders: a systematic review. *J Affect Disord*  
37 639 2013;150(3):707-19. doi: 10.1016/j.jad.2013.05.042
- 38 640 31. Qaseem A, Barry MJ, Kansagara D. Nonpharmacologic Versus Pharmacologic Treatment of Adult  
39 641 Patients With Major Depressive Disorder: A Clinical Practice Guideline From the American  
40 642 College of Physicians. *Ann Intern Med* 2016;164(5):350-9. doi: 10.7326/m15-2570
- 41 643 32. APA. Practice guideline for the treatment of patients with major depressive disorder.  
42 644 Washington, DC: American Psychiatric Association 2010.
- 43 645 33. Ravindran AV, Balneaves LG, Faulkner G, et al. Canadian Network for Mood and Anxiety  
44 646 Treatments (CANMAT) 2016 Clinical Guidelines for the Management of Adults with Major  
45 647 Depressive Disorder: Section 5. Complementary and Alternative Medicine Treatments. *Can J*  
46 648 *Psychiatry* 2016;61(9):576-87. doi: 10.1177/0706743716660290
- 47 649 34. DGPPN, BÄK, KBV, et al. Clinical practice guideline for unipolar depression [S3-Leitlinie/Nationale  
48 650 VersorgungsLeitlinie Unipolare Depression – Langfassung, 2. Auflage. Version 5] 2015  
49 651 [Available from: [http://www.awmf.org/uploads/tx\\_szleitlinien/nvl-](http://www.awmf.org/uploads/tx_szleitlinien/nvl-005l_S3_Unipolare_Depression_2017-05.pdf)  
50 652 [005l\\_S3\\_Unipolare\\_Depression\\_2017-05.pdf](http://www.awmf.org/uploads/tx_szleitlinien/nvl-005l_S3_Unipolare_Depression_2017-05.pdf).
- 51 653 35. National Collaborating Centre for Mental Health. Depression: The Treatment and Management of  
52 654 Depression in Adults (Updated Edition). Leicester and London UK: The British Psychological  
53 655 Society & The Royal College of Psychiatrists 2010.
- 54 656 36. Bauer M, Pfennig A, Severus E, et al. World Federation of Societies of Biological Psychiatry  
55 657 (WFSBP) guidelines for biological treatment of unipolar depressive disorders, part 1: update

- 1  
2 658 2013 on the acute and continuation treatment of unipolar depressive disorders. *World J Biol*  
3 659 *Psychiatry* 2013;14(5):334-85. doi: 10.3109/15622975.2013.804195
- 4 660 37. Moher D, Liberati A, Tetzlaff J, et al. Preferred reporting items for systematic reviews and meta-  
5 661 analyses: the PRISMA statement. *BMJ* 2009;339:b2535. doi: 10.1136/bmj.b2535
- 6 662 38. Panic N, Leoncini E, de Belvis G, et al. Evaluation of the endorsement of the preferred reporting  
7 663 items for systematic reviews and meta-analysis (PRISMA) statement on the quality of  
8 664 published systematic review and meta-analyses. *PLoS One* 2013;8(12):e83138. doi:  
9 665 10.1371/journal.pone.0083138
- 10 666 39. Higgins JPT, Green S. *Cochrane Handbook for systematic reviews of interventions* Version 5.1.0:  
11 667 The Cochrane Collaboration; . 2011. <http://handbook.cochrane.org>.
- 12 668 40. National Center for Complementary and Integrative Health. Complementary, Alternative, or  
13 669 Integrative Health: What's In a Name? 2016 [Available from:  
14 670 <https://nccih.nih.gov/health/integrative-health> accessed 24.07.2017.
- 15 671 41. Keller MB. Remission versus response: the new gold standard of antidepressant care. *J Clin*  
16 672 *Psychiatry* 2004;65 Suppl 4:53-9.
- 17 673 42. Wieland LS, Manheimer E, Berman BM. Development and classification of an operational  
18 674 definition of complementary and alternative medicine for the Cochrane collaboration. *Altern*  
19 675 *Ther Health Med* 2011;17(2):50-9.
- 20 676 43. Freeman MP, Mischoulon D, Tedeschini E, et al. Complementary and alternative medicine for  
21 677 major depressive disorder: a meta-analysis of patient characteristics, placebo-response rates,  
22 678 and treatment outcomes relative to standard antidepressants. *J Clin Psychiatry*  
23 679 2010;71(6):682-8. doi: 10.4088/JCP.10r05976blu
- 24 680 44. Muin M, Fontelo P, Ackerman M. PubMed Informer: monitoring MEDLINE/PubMed through e-  
25 681 mail alerts, SMS, PDA downloads and RSS feeds. *AMIA Annu Symp Proc* 2005:1057.
- 26 682 45. Shea BJ, Grimshaw JM, Wells GA, et al. Development of AMSTAR: a measurement tool to assess  
27 683 the methodological quality of systematic reviews. *BMC Med Res Methodol* 2007;7:10. doi:  
28 684 10.1186/1471-2288-7-10
- 29 685 46. Shea BJ, Hamel C, Wells GA, et al. AMSTAR is a reliable and valid measurement tool to assess the  
30 686 methodological quality of systematic reviews. *J Clin Epidemiol* 2009;62(10):1013-20. doi:  
31 687 10.1016/j.jclinepi.2008.10.009
- 32 688 47. Cohen J. *Statistical power analysis for the behavioral sciences*. Hillsdale: Lawrence Erlbaum  
33 689 Associates 1988.
- 34 690 48. National Institute for Clinical Excellence. *Depression: management of depression in primary and*  
35 691 *secondary care. Clinical practice guideline No 23*. London: National Institute for Clinical  
36 692 Excellence 2004. 670 p.:670.
- 37 693 49. Brozek JL, Akl EA, Alonso-Coello P, et al. Grading quality of evidence and strength of  
38 694 recommendations in clinical practice guidelines. Part 1 of 3. An overview of the GRADE  
39 695 approach and grading quality of evidence about interventions. *Allergy* 2009;64(5):669-77.  
40 696 doi: 10.1111/j.1398-9995.2009.01973.x [published Online First: 2009/02/13]
- 41 697 50. Stub T, Alræk T, Liu J. Acupuncture treatment for depression—A systematic review and meta-  
42 698 analysis. *European Journal of Integrative Medicine* 2011;3(4):e259-e70. doi:  
43 699 <https://doi.org/10.1016/j.eujim.2011.09.003>
- 44 700 51. Smith CA, Armour M, Lee MS, et al. Acupuncture for depression. *Cochrane Database Syst Rev*  
45 701 2018;3:CD004046. doi: 10.1002/14651858.CD004046.pub4
- 46 702 52. Al-Karawi D, Al Mamoori DA, Tayyar Y. The Role of Curcumin Administration in Patients with  
47 703 Major Depressive Disorder: Mini Meta-Analysis of Clinical Trials. *Phytother Res*  
48 704 2016;30(2):175-83. doi: 10.1002/ptr.5524
- 49 705 53. Appleton KM, Rogers PJ, Ness AR. Updated systematic review and meta-analysis of the effects of  
50 706 n-3 long-chain polyunsaturated fatty acids on depressed mood. *Am J Clin Nutr*  
51 707 2010;91(3):757-70. doi: 10.3945/ajcn.2009.28313
- 52 708 54. Appleton KM, Sallis HM, Perry R, et al. omega-3 Fatty acids for major depressive disorder in  
53 709 adults: an abridged Cochrane review. *BMJ Open* 2016;6(3):e010172. doi: 10.1136/bmjopen-  
54 710 2015-010172
- 55 711 55. Asher GN, Gartlehner G, Gaynes BN, et al. Comparative Benefits and Harms of Complementary  
56 712 and Alternative Medicine Therapies for Initial Treatment of Major Depressive Disorder:



- 1  
2 713 Systematic Review and Meta-Analysis. *J Altern Complement Med* 2017 doi:  
3 714 10.1089/acm.2016.0261
- 4 715 56. Bloch MH, Hannestad J. Omega-3 fatty acids for the treatment of depression: systematic review  
5 716 and meta-analysis. *Mol Psychiatry* 2012;17(12):1272-82. doi: 10.1038/mp.2011.100
- 6 717 57. Cabral P, Meyer HB, Ames D. Effectiveness of yoga therapy as a complementary treatment for  
7 718 major psychiatric disorders: a meta-analysis. *Prim Care Companion CNS Disord*  
8 719 2011;13(4):PCC.10r01068. doi: 10.4088/PCC.10r01068
- 9 720 58. Chi I, Jordan-Marsh M, Guo M, et al. Tai chi and reduction of depressive symptoms for older  
10 721 adults: a meta-analysis of randomized trials. *Geriatr Gerontol Int* 2013;13(1):3-12. doi:  
11 722 10.1111/j.1447-0594.2012.00882.x
- 12 723 59. Clarke K, Mayo-Wilson E, Kenny J, et al. Can non-pharmacological interventions prevent relapse in  
13 724 adults who have recovered from depression? A systematic review and meta-analysis of  
14 725 randomised controlled trials. *Clin Psychol Rev* 2015;39:58-70. doi: 10.1016/j.cpr.2015.04.002
- 15 726 60. Cui YH, Zheng Y. A meta-analysis on the efficacy and safety of St John's wort extract in depression  
16 727 therapy in comparison with selective serotonin reuptake inhibitors in adults. *Neuropsychiatr*  
17 728 *Dis Treat* 2016;12:1715-23. doi: 10.2147/ndt.s106752
- 18 729 61. Galante J, Iribarren SJ, Pearce PF. Effects of mindfulness-based cognitive therapy on mental  
19 730 disorders: a systematic review and meta-analysis of randomised controlled trials. *J Res Nurs*  
20 731 2013;18(2):133-55. doi: 10.1177/1744987112466087
- 21 732 62. Golden RN, Gaynes BN, Ekstrom RD, et al. The efficacy of light therapy in the treatment of mood  
22 733 disorders: a review and meta-analysis of the evidence. *Am J Psychiatry* 2005;162(4):656-62.  
23 734 doi: 10.1176/appi.ajp.162.4.656
- 24 735 63. Gowda U, Mutowo MP, Smith BJ, et al. Vitamin D supplementation to reduce depression in  
25 736 adults: meta-analysis of randomized controlled trials. *Nutrition* 2015;31(3):421-9. doi:  
26 737 10.1016/j.nut.2014.06.017
- 27 738 64. Goyal M, Singh S, Sibinga EM, et al. Meditation programs for psychological stress and well-being:  
28 739 a systematic review and meta-analysis. *JAMA Intern Med* 2014;174(3):357-68. doi:  
29 740 10.1001/jamainternmed.2013.13018
- 30 741 65. Hofmann SG, Sawyer AT, Witt AA, et al. The effect of mindfulness-based therapy on anxiety and  
31 742 depression: A meta-analytic review. *J Consult Clin Psychol* 2010;78(2):169-83. doi:  
32 743 10.1037/a0018555
- 33 744 66. Jorm AF, Christensen H, Griffiths KM, et al. Effectiveness of complementary and self-help  
34 745 treatments for depression. *Med J Aust* 2002;176 Suppl:S84-96.
- 35 746 67. Kim HL, Streltzer J, Goebert D. St. John's wort for depression: a meta-analysis of well-defined  
36 747 clinical trials. *J Nerv Ment Dis* 1999;187(9):532-8.
- 37 748 68. Klainin-Yobas P, Oo WN, Suzanne Yew PY, et al. Effects of relaxation interventions on depression  
38 749 and anxiety among older adults: a systematic review. *Aging Ment Health* 2015;19(12):1043-  
39 750 55. doi: 10.1080/13607863.2014.997191
- 40 751 69. Kou MJ, Chen JX. Integrated traditional and Western medicine for treatment of depression based  
41 752 on syndrome differentiation: a meta-analysis of randomized controlled trials based on the  
42 753 Hamilton depression scale. *J Tradit Chin Med* 2012;32(1):1-5.
- 43 754 70. Kraguljac NV, Montori VM, Pavuluri M, et al. Efficacy of omega-3 fatty acids in mood disorders - a  
44 755 systematic review and metaanalysis. *Psychopharmacol Bull* 2009;42(3):39-54.
- 45 756 71. Lai J, Moxey A, Nowak G, et al. The efficacy of zinc supplementation in depression: systematic  
46 757 review of randomised controlled trials. *J Affect Disord* 2012;136(1-2):e31-e39. doi:  
47 758 10.1016/j.jad.2011.06.022
- 48 759 72. Li G, Mbuagbaw L, Samaan Z, et al. Efficacy of vitamin D supplementation in depression in adults:  
49 760 a systematic review. *J Clin Endocrinol Metab* 2014;99(3):757-67. doi: 10.1210/jc.2013-3450
- 50 761 73. Lin PY, Su KP. A meta-analytic review of double-blind, placebo-controlled trials of antidepressant  
51 762 efficacy of omega-3 fatty acids. *J Clin Psychiatry* 2007;68(7):1056-61.
- 52 763 74. Linde K, Berner M, Egger M, et al. St John's wort for depression: meta-analysis of randomised  
53 764 controlled trials. *Br J Psychiatry* 2005;186:99-107. doi: 10.1192/bjp.186.2.99
- 54 765 75. Linde K, Mulrow CD, Berner M, et al. St John's wort for depression. *Cochrane Database Syst Rev*  
55 766 2005(2):CD000448. doi: 10.1002/14651858.CD000448.pub2

- 1  
2 767 76. Man C, Li C, Gong D, et al. Meta-analysis of Chinese herbal Xiaoyao formula as an adjuvant  
3 768 treatment in relieving depression in Chinese patients. *Complement Ther Med*  
4 769 2014;22(2):362-70. doi: 10.1016/j.ctim.2014.02.001  
5 770 77. Martins JG. EPA but not DHA appears to be responsible for the efficacy of omega-3 long chain  
6 771 polyunsaturated fatty acid supplementation in depression: evidence from a meta-analysis of  
7 772 randomized controlled trials. *J Am Coll Nutr* 2009;28(5):525-42.  
8 773 78. Mocking RJ, Harmsen I, Assies J, et al. Meta-analysis and meta-regression of omega-3  
9 774 polyunsaturated fatty acid supplementation for major depressive disorder. *Transl Psychiatry*  
10 775 2016;6:e756. doi: 10.1038/tp.2016.29  
11 776 79. Moyer CA, Rounds J, Hannum JW. A meta-analysis of massage therapy research. *Psychol Bull*  
12 777 2004;130(1):3-18. doi: 10.1037/0033-2909.130.1.3  
13 778 80. Nussbaumer B, Kaminski-Hartenthaler A, Forneris Catherine A, et al. Light therapy for preventing  
14 779 seasonal affective disorder. *Cochrane Database Syst Rev* 2015(11):CD011269. doi:  
15 780 10.1002/14651858.CD011269.pub2  
16 781 81. Piet J, Hougaard E. The effect of mindfulness-based cognitive therapy for prevention of relapse in  
17 782 recurrent major depressive disorder: a systematic review and meta-analysis. *Clin Psychol Rev*  
18 783 2011;31(6):1032-40. doi: 10.1016/j.cpr.2011.05.002  
19 784 82. Qin F, Wu XA, Tang Y, et al. Meta-analysis of randomized controlled trials to assess the  
20 785 effectiveness and safety of Free and Easy Wanderer Plus, a polyherbal preparation for  
21 786 depressive disorders. *J Psychiatr Res* 2011;45(11):1518-24. doi:  
22 787 10.1016/j.jpsychires.2011.06.018  
23 788 83. Rahimi R, Nikfar S, Abdollahi M. Efficacy and tolerability of *Hypericum perforatum* in major  
24 789 depressive disorder in comparison with selective serotonin reuptake inhibitors: a meta-  
25 790 analysis. *Prog Neuropsychopharmacol Biol Psychiatry* 2009;33(1):118-27. doi:  
26 791 10.1016/j.pnpbp.2008.10.018  
27 792 84. Ren Y, Zhu C, Wu J, et al. Comparison between herbal medicine and fluoxetine for depression: a  
28 793 systematic review of randomized controlled trials. *Complement Ther Med* 2015;23(5):674-84.  
29 794 doi: 10.1016/j.ctim.2015.07.002  
30 795 85. Roder C, Schaefer M, Leucht S. [Meta-analysis of effectiveness and tolerability of treatment of  
31 796 mild to moderate depression with St. John's Wort]. *Fortschr Neurol Psychiatr* 2004;72(6):330-  
32 797 43. doi: 10.1055/s-2003-812513  
33 798 86. Sarris J, Murphy J, Mischoulon D, et al. Adjunctive Nutraceuticals for Depression: A Systematic  
34 799 Review and Meta-Analyses. *Am J Psychiatry* 2016;173(6):575-87. doi:  
35 800 10.1176/appi.ajp.2016.15091228  
36 801 87. Sarris J, Panossian A, Schweitzer I, et al. Herbal medicine for depression, anxiety and insomnia: a  
37 802 review of psychopharmacology and clinical evidence. *Eur Neuropsychopharmacol*  
38 803 2011;21(12):841-60. doi: 10.1016/j.euroneuro.2011.04.002  
39 804 88. Smith CA, Hay PP. Acupuncture for depression. *Cochrane Database Syst Rev* 2005(2):CD004046.  
40 805 doi: 10.1002/14651858.CD004046.pub2  
41 806 89. Sublette ME, Ellis SP, Geant AL, et al. Meta-analysis of the effects of eicosapentaenoic acid (EPA)  
42 807 in clinical trials in depression. *J Clin Psychiatry* 2011;72(12):1577-84. doi:  
43 808 10.4088/JCP.10m06634  
44 809 90. Taylor MJ, Carney SM, Goodwin GM, et al. Folate for depressive disorders: systematic review and  
45 810 meta-analysis of randomized controlled trials. *J Psychopharmacol* 2004;18(2):251-6. doi:  
46 811 10.1177/0269881104042630  
47 812 91. Wang C, Bannuru R, Ramel J, et al. Tai Chi on psychological well-being: systematic review and  
48 813 meta-analysis. *BMC Complement Altern Med* 2010;10:23. doi: 10.1186/1472-6882-10-23  
49 814 92. Wang F, Lee EK, Wu T, et al. The effects of tai chi on depression, anxiety, and psychological well-  
50 815 being: a systematic review and meta-analysis. *Int J Behav Med* 2014;21(4):605-17. doi:  
51 816 10.1007/s12529-013-9351-9  
52 817 93. Wang H, Qi H, Wang BS, et al. Is acupuncture beneficial in depression: a meta-analysis of 8  
53 818 randomized controlled trials? *J Affect Disord* 2008;111(2-3):125-34. doi:  
54 819 10.1016/j.jad.2008.04.020

- 1  
2 820 94. Wang Y, Fan R, Huang X. Meta-analysis of the clinical effectiveness of traditional Chinese  
3 821 medicine formula Chaihu-Shugan-San in depression. *J Ethnopharmacol* 2012;141(2):571-7.  
4 822 doi: 10.1016/j.jep.2011.08.079
- 5 823 95. Wang YY, Li XH, Zheng W, et al. Mindfulness-based interventions for major depressive disorder: A  
6 824 comprehensive meta-analysis of randomized controlled trials. *J Affect Disord* 2018;229:429-  
7 825 36. doi: 10.1016/j.jad.2017.12.093
- 8 826 96. Whiskey E, Werneke U, Taylor D. A systematic review and meta-analysis of *Hypericum*  
9 827 *perforatum* in depression: a comprehensive clinical review. *Int Clin Psychopharmacol*  
10 828 2001;16(5):239-52.
- 11 829 97. Yeung WF, Chung KF, Ng KY, et al. A meta-analysis of the efficacy and safety of traditional Chinese  
12 830 medicine formula Ganmai Dazao decoction for depression. *J Ethnopharmacol*  
13 831 2014;153(2):309-17. doi: 10.1016/j.jep.2014.02.046
- 14 832 98. Yin J, Dishman RK. The effect of Tai Chi and Qigong practice on depression and anxiety symptoms:  
15 833 A systematic review and meta-regression analysis of randomized controlled trials. *Ment*  
16 834 *Health Phys Act* 2014;7(3):135-46.
- 17 835 99. Zhang X, Kang D, Zhang L, et al. Shuganjiayu capsule for major depressive disorder (MDD) in  
18 836 adults: a systematic review. *Aging Ment Health* 2014;18(8):941-53. doi:  
19 837 10.1080/13607863.2014.899975
- 20 838 100. Zheng W, Zhang YF, Zhong HQ, et al. Wuling Capsule for Major Depressive Disorder: A Meta-  
21 839 analysis of Randomised Controlled Trials. *East Asian Arch Psychiatry* 2016;26(3):87-97.
- 22 840 101. Ng QX, Venkatanarayanan N, Ho CYX. Clinical use of *Hypericum perforatum* (St John's wort) in  
23 841 depression: A meta-analysis. *J Affect Disord* 2017;210:211-21.
- 24 842 102. Chan YY, Lo WY, Yang SN, et al. The benefit of combined acupuncture and antidepressant  
25 843 medication for depression: A systematic review and meta-analysis. *J Affect Disord*  
26 844 2015;176:106-17. doi: 10.1016/j.jad.2015.01.048 [published Online First: 2015/02/24]
- 27 845 103. Smith CA, Hay PP, Macpherson H. Acupuncture for depression. *Cochrane Database Syst Rev*  
28 846 2010(1):CD004046. doi: 10.1002/14651858.CD004046.pub3
- 29 847 104. Zhang Y, Qu SS, Zhang JP, et al. Rapid Onset of the Effects of Combined Selective Serotonin  
30 848 Reuptake Inhibitors and Electroacupuncture on Primary Depression: A Meta-Analysis. *J Altern*  
31 849 *Complement Med* 2016;22(1):1-8. doi: 10.1089/acm.2015.0114
- 32 850 105. Zhang ZJ, Chen HY, Yip KC, et al. The effectiveness and safety of acupuncture therapy in  
33 851 depressive disorders: systematic review and meta-analysis. *J Affect Disord* 2010;124(1-2):9-  
34 852 21. doi: 10.1016/j.jad.2009.07.005
- 35 853 106. Coelho HF, Boddy K, Ernst E. Massage therapy for the treatment of depression: a systematic  
36 854 review. *Int J Clin Pract* 2008;62(2):325-33. doi: 10.1111/j.1742-1241.2007.01553.x
- 37 855 107. Cramer H, Anheyer D, Lauche R, et al. A systematic review of yoga for major depressive disorder.  
38 856 *J Affect Disord* 2017;213:70-77. doi: 10.1016/j.jad.2017.02.006
- 39 857 108. Derom ML, Sayon-Orea C, Martinez-Ortega JM, et al. Magnesium and depression: a systematic  
40 858 review. *Nutr Neurosci* 2013;16(5):191-206. doi: 10.1179/1476830512y.0000000044
- 41 859 109. Dolle K, Schulte-Korne G. [Complementary treatment methods for depression in children and  
42 860 adolescents]. *Prax Kinderpsychol Kinderpsychiatr* 2014;63(3):237-63.
- 43 861 110. Dwyer AV, Whitten DL, Hawrelak JA. Herbal medicines, other than St. John's Wort, in the  
44 862 treatment of depression: a systematic review. *Altern Med Rev* 2011;16(1):40-9.
- 45 863 111. Fond G, Macgregor A, Leboyer M, et al. Fasting in mood disorders: neurobiology and  
46 864 effectiveness. A review of the literature. *Psychiatry Res* 2013;209(3):253-8. doi:  
47 865 10.1016/j.psychres.2012.12.018
- 48 866 112. Hausenblas HA, Heekin K, Mutchie HL, et al. A systematic review of randomized controlled trials  
49 867 examining the effectiveness of saffron (*Crocus sativus* L.) on psychological and behavioral  
50 868 outcomes. *J Integr Med* 2015;13(4):231-40. doi: 10.1016/s2095-4964(15)60176-5
- 51 869 113. Jorm AF, Allen NB, O'Donnell CP, et al. Effectiveness of complementary and self-help treatments  
52 870 for depression in children and adolescents. *Med J Aust* 2006;185(7):368-72.
- 53 871 114. Maratos AS, Gold C, Wang X, et al. Music therapy for depression. *Cochrane Database Syst Rev*  
54 872 2008(1):CD004517. doi: 10.1002/14651858.CD004517.pub2

- 1  
2 873 115. Opie RS, O'Neil A, Itsiopoulos C, et al. The impact of whole-of-diet interventions on depression  
3 874 and anxiety: a systematic review of randomised controlled trials. *Public Health Nutr*  
4 875 2015;18(11):2074-93. doi: 10.1017/s1368980014002614
- 5 876 116. Pilkington K, Kirkwood G, Rampes H, et al. Homeopathy for depression: a systematic review of  
6 877 the research evidence. *Homeopathy* 2005;94(3):153-63.
- 7 878 117. Sanchez-Vidana DI, Ngai SP, He W, et al. The Effectiveness of Aromatherapy for Depressive  
8 879 Symptoms: A Systematic Review. *Evid Based Complement Alternat Med* 2017;2017:5869315.  
9 880 doi: 10.1155/2017/5869315
- 10 881 118. Schoenberg PL, David AS. Biofeedback for psychiatric disorders: a systematic review. *Appl*  
11 882 *Psychophysiol Biofeedback* 2014;39(2):109-35. doi: 10.1007/s10484-014-9246-9
- 12 883 119. Tsang HW, Chan EP, Cheung WM. Effects of mindful and non-mindful exercises on people with  
13 884 depression: a systematic review. *Br J Clin Psychol* 2008;47(Pt 3):303-22. doi:  
14 885 10.1348/014466508x279260
- 15 886 120. Williams AL, Cotter A, Sabina A, et al. The role for vitamin B-6 as treatment for depression: a  
16 887 systematic review. *Fam Pract* 2005;22(5):532-7. doi: 10.1093/fampra/cmi040
- 17 888 121. Al-Karawi D, Jubair L. Bright light therapy for nonseasonal depression: Meta-analysis of clinical  
18 889 trials. *J Affect Disord* 2016;198:64-71. doi: 10.1016/j.jad.2016.03.016
- 19 890 122. Grosso G, Pajak A, Marventano S, et al. Role of omega-3 fatty acids in the treatment of  
20 891 depressive disorders: a comprehensive meta-analysis of randomized clinical trials. *PLoS One*  
21 892 2014;9(5):e96905. doi: 10.1371/journal.pone.0096905
- 22 893 123. Hallahan B, Ryan T, Hibbeln JR, et al. Efficacy of omega-3 highly unsaturated fatty acids in the  
23 894 treatment of depression. *Br J Psychiatry* 2016;209(3):192-201. doi:  
24 895 10.1192/bjp.bp.114.160242
- 25 896 124. Ng QX, Peters C, Ho CYX, et al. A meta-analysis of the use of probiotics to alleviate depressive  
26 897 symptoms. *J Affect Disord* 2017;228:13-19. doi: 10.1016/j.jad.2017.11.063
- 27 898 125. Penders TM, Stanciu CN, Schoemann AM, et al. Bright Light Therapy as Augmentation of  
28 899 Pharmacotherapy for Treatment of Depression: A Systematic Review and Meta-Analysis.  
29 900 *Prim Care Companion CNS Disord* 2016;18(5) doi: 10.4088/PCC.15r01906
- 30 901 126. Perera S, Eisen R, Bhatt M, et al. Light therapy for non-seasonal depression: systematic review  
31 902 and meta-analysis. *BJPsych Open* 2016;2(2):116-26. doi: 10.1192/bjpo.bp.115.001610
- 32 903 127. Shih M, Yang YH, Koo M. A meta-analysis of hypnosis in the treatment of depressive symptoms:  
33 904 a brief communication. *Int J Clin Exp Hypn* 2009;57(4):431-42. doi:  
34 905 10.1080/00207140903099039
- 35 906 128. Spedding S. Vitamin D and depression: a systematic review and meta-analysis comparing studies  
36 907 with and without biological flaws. *Nutrients* 2014;6(4):1501-18. doi: 10.3390/nu6041501
- 37 908 129. Davidson JR, Crawford C, Ives JA, et al. Homeopathic treatments in psychiatry: A systematic  
38 909 review of randomized placebo-controlled studies. *J Clin Psychiatry* 2011;72(6):795-805.
- 39 910 130. Ernst E. Bach flower remedies: a systematic review of randomised clinical trials. *Swiss Med Wkly*  
40 911 2010;140:w13079. doi: 10.4414/smw.2010.13079
- 41 912 131. Galante J, Galante I, Bekkers MJ, et al. Effect of kindness-based meditation on health and well-  
42 913 being: a systematic review and meta-analysis. *J Consult Clin Psychol* 2014;82(6):1101-14. doi:  
43 914 10.1037/a0037249
- 44 915 132. Goncalves JP, Lucchetti G, Menezes PR, et al. Religious and spiritual interventions in mental  
45 916 health care: a systematic review and meta-analysis of randomized controlled clinical trials.  
46 917 *Psychol Med* 2015;45(14):2937-49. doi: 10.1017/s0033291715001166
- 47 918 133. Hou WH, Chiang PT, Hsu TY, et al. Treatment effects of massage therapy in depressed people: a  
48 919 meta-analysis. *J Clin Psychiatry* 2010;71(7):894-901. doi: 10.4088/JCP.09r05009blu
- 49 920 134. Joyce J, Herbison GP. Reiki for depression and anxiety. *Cochrane Database Syst Rev*  
50 921 2015(4):CD006833. doi: 10.1002/14651858.CD006833.pub2
- 51 922 135. Blanck P, Perleth S, Heidenreich T, et al. Effects of mindfulness exercises as stand-alone  
52 923 intervention on symptoms of anxiety and depression: Systematic review and meta-analysis.  
53 924 *Behav Res Ther* 2017;102:25-35. doi: 10.1016/j.brat.2017.12.002
- 54 925 136. Jun JH, Choi TY, Lee JA, et al. Herbal medicine (Gan Mai Da Zao decoction) for depression: a  
55 926 systematic review and meta-analysis of randomized controlled trials. *Maturitas*  
56 927 2014;79(4):370-80. doi: 10.1016/j.maturitas.2014.08.008

- 1  
2 928 137. Lee TM, Chan CC. Dose-response relationship of phototherapy for seasonal affective disorder: a  
3 929 meta-analysis. *Acta Psychiatr Scand* 1999;99(5):315-23.
- 4 930 138. Nelms JA, Castel L. A Systematic Review and Meta-Analysis of Randomized and Nonrandomized  
5 931 Trials of Clinical Emotional Freedom Techniques (EFT) for the Treatment of Depression.  
6 932 *Explore (NY)* 2016;12(6):416-26. doi: 10.1016/j.explore.2016.08.001
- 7 933 139. Aalbers S, Fusar-Poli L, Freeman RE, et al. Music therapy for depression. *Cochrane Database of*  
8 934 *Systematic Reviews* 2017(11):CD004517. doi: 10.1002/14651858.CD004517.pub3
- 9 935 140. Almeida OP, Ford AH, Flicker L. Systematic review and meta-analysis of randomized placebo-  
10 936 controlled trials of folate and vitamin B12 for depression. *Int Psychogeriatr* 2015;27(5):727-  
11 937 37. doi: 10.1017/s1041610215000046
- 12 938 141. Anderson N, Heywood-Everett S, Siddiqi N, et al. Faith-adapted psychological therapies for  
13 939 depression and anxiety: Systematic review and meta-analysis. *J Affect Disord* 2015;176:183-  
14 940 96. doi: 10.1016/j.jad.2015.01.019
- 15 941 142. Apaydin EA, Maher AR, Shanman R, et al. A systematic review of St. John's wort for major  
16 942 depressive disorder. *Syst Rev* 2016;5(1):148. doi: 10.1186/s13643-016-0325-2
- 17 943 143. Appleton KM, Sallis HM, Perry R, et al. Omega-3 fatty acids for depression in adults. *Cochrane*  
18 944 *Database Syst Rev* 2015(11):CD004692. doi: 10.1002/14651858.CD004692.pub4
- 19 945 144. Bo A, Mao W, Lindsey MA. Effects of mind-body interventions on depressive symptoms among  
20 946 older chinese adults: A systematic review and meta-analysis. *Int J Geriatr Psychiatry*  
21 947 2017;32(5):509-21. doi: 10.1002/gps.4688
- 22 948 145. Cramer H, Lauche R, Langhorst J, et al. Yoga for depression: a systematic review and meta-  
23 949 analysis. *Depress Anxiety* 2013;30(11):1068-83. doi: 10.1002/da.22166
- 24 950 146. Galizia I, Oldani L, Macritchie K, et al. S-adenosyl methionine (SAME) for depression in adults.  
25 951 *Cochrane Database Syst Rev* 2016(10):CD011286. doi: 10.1002/14651858.CD011286.pub2
- 26 952 147. Hausenblas HA, Saha D, Dubyak PJ, et al. Saffron (*Crocus sativus* L.) and major depressive  
27 953 disorder: a meta-analysis of randomized clinical trials. *J Integr Med* 2013;11(6):377-83. doi:  
28 954 10.3736/jintegrmed2013056
- 29 955 148. Huang R, Wang K, Hu J. Effect of Probiotics on Depression: A Systematic Review and Meta-  
30 956 Analysis of Randomized Controlled Trials. *Nutrients* 2016;8(8) doi: 10.3390/nu8080483
- 31 957 149. Kuyken W, Warren FC, Taylor RS, et al. Efficacy of Mindfulness-Based Cognitive Therapy in  
32 958 Prevention of Depressive Relapse: An Individual Patient Data Meta-analysis From  
33 959 Randomized Trials. *JAMA Psychiatry* 2016;73(6):565-74. doi:  
34 960 10.1001/jamapsychiatry.2016.0076
- 35 961 150. Linde K, Berner MM, Kriston L. St John's wort for major depression. *Cochrane Database Syst Rev*  
36 962 2008;8(4):CD000448.
- 37 963 151. Liu X, Clark J, Siskind D, et al. A systematic review and meta-analysis of the effects of Qigong and  
38 964 Tai Chi for depressive symptoms. *Complement Ther Med* 2015;23(4):516-34. doi:  
39 965 10.1016/j.ctim.2015.05.001
- 40 966 152. Martensson B, Pettersson A, Berglund L, et al. Bright white light therapy in depression: A critical  
41 967 review of the evidence. *J Affect Disord* 2015;182:1-7. doi: 10.1016/j.jad.2015.04.013
- 42 968 153. Meekums B, Karkou V, Nelson EA. Dance movement therapy for depression. *Cochrane Database*  
43 969 *Syst Rev* 2015(2):CD009895. doi: 10.1002/14651858.CD009895.pub2
- 44 970 154. Mukai T, Kishi T, Matsuda Y, et al. A meta-analysis of inositol for depression and anxiety  
45 971 disorders. *Hum Psychopharmacol* 2014;29(1):55-63. doi: 10.1002/hup.2369
- 46 972 155. Ng QX, Koh SSH, Chan HW, et al. Clinical Use of Curcumin in Depression: A Meta-Analysis. *J Am*  
47 973 *Med Dir Assoc* 2017;18(6):503-08. doi: 10.1016/j.jamda.2016.12.071
- 48 974 156. Scheffl C, Kilarski LL, Bschor T, et al. Efficacy of adding nutritional supplements in unipolar  
49 975 depression: A systematic review and meta-analysis. *Eur Neuropsychopharmacol*  
50 976 2017;27(11):1090-109. doi: 10.1016/j.euroneuro.2017.07.004
- 51 977 157. Shaffer JA, Edmondson D, Wasson LT, et al. Vitamin D supplementation for depressive  
52 978 symptoms: a systematic review and meta-analysis of randomized controlled trials.  
53 979 *Psychosom Med* 2014;76(3):190-6. doi: 10.1097/psy.0000000000000044
- 54 980 158. Shaw KA, Turner J, Del Mar C. Tryptophan and 5-Hydroxytryptophan for depression. *Cochrane*  
55 981 *Database of Systematic Reviews* 2002(1):CD003198. doi: 10.1002/14651858.CD003198

- 1  
2 982 159. Strauss C, Cavanagh K, Oliver A, et al. Mindfulness-based interventions for people diagnosed  
3 983 with a current episode of an anxiety or depressive disorder: a meta-analysis of randomised  
4 984 controlled trials. *PLoS One* 2014;9(4):e96110. doi: 10.1371/journal.pone.0096110  
5 985 160. Taylor MJ, Carney S, Geddes J, et al. Folate for depressive disorders. *Cochrane Database Syst Rev*  
6 986 2003(2):CD003390. doi: 10.1002/14651858.cd003390  
7 987 161. Tuunainen A, Kripke DF, Endo T. Light therapy for non-seasonal depression. *Cochrane Database*  
8 988 *Syst Rev* 2004(2):CD004050. doi: 10.1002/14651858.CD004050.pub2  
9 989 162. Yeung WF, Chung KF, Ng KY, et al. A systematic review on the efficacy, safety and types of  
10 990 Chinese herbal medicine for depression. *J Psychiatr Res* 2014;57:165-75. doi:  
11 991 10.1016/j.jpsychires.2014.05.016  
12 992 163. Zhao K, Bai Z, Bo A, et al. A systematic review and meta-analysis of music therapy for the older  
13 993 adults with depression. *Int J Geriatr Psychiatry* 2016;31(11):1188-98.  
14 994 164. von Hippel PT. The heterogeneity statistic  $I^2$  can be biased in small meta-analyses. *BMC Med Res*  
15 995 *Methodol* 2015;15(1):35. doi: 10.1186/s12874-015-0024-z  
16 996 165. Parikh SV, Quilty LC, Ravitz P, et al. Canadian Network for Mood and Anxiety Treatments  
17 997 (CANMAT) 2016 Clinical Guidelines for the Management of Adults with Major Depressive  
18 998 Disorder: Section 2. Psychological Treatments. *Can J Psychiatry* 2016;61(9):524-39. doi:  
19 999 10.1177/0706743716659418  
20 1000 166. Kennedy SH, Lam RW, McIntyre RS, et al. Canadian Network for Mood and Anxiety Treatments  
21 1001 (CANMAT) 2016 Clinical Guidelines for the Management of Adults with Major Depressive  
22 1002 Disorder: Section 3. Pharmacological Treatments. *Can J Psychiatry* 2016;61(9):540-60. doi:  
23 1003 10.1177/0706743716659417  
24 1004 167. Fava GA, Gatti A, Belaise C, et al. Withdrawal Symptoms after Selective Serotonin Reuptake  
25 1005 Inhibitor Discontinuation: A Systematic Review. *Psychother Psychosom* 2015;84(2):72-81. doi:  
26 1006 10.1159/000370338  
27 1007 168. Mills E, Montori VM, Wu P, et al. Interaction of St John's wort with conventional drugs:  
28 1008 systematic review of clinical trials. *BMJ* 2004;329(7456):27-30. doi: 10.1136/bmj.329.7456.27  
29 1009 169. Schulz KF, Altman DG, Moher D, et al. CONSORT 2010 statement: updated guidelines for  
30 1010 reporting parallel group randomised trials. *BMJ* 2010;340:c332. doi: 10.1136/bmj.c332  
31 1011 170. Cramer H, Lauche R, Langhorst J, et al. Are Indian yoga trials more likely to be positive than  
32 1012 those from other countries? A systematic review of randomized controlled trials. *Contemp*  
33 1013 *Clin Trials* 2015;41:269-72. doi: 10.1016/j.cct.2015.02.005  
34 1014 171. Ma B, Chen ZM, Xu JK, et al. Do the CONSORT and STRICTA Checklists Improve the Reporting  
35 1015 Quality of Acupuncture and Moxibustion Randomized Controlled Trials Published in Chinese  
36 1016 Journals? A Systematic Review and Analysis of Trends. *PLoS One* 2016;11(1):e0147244. doi:  
37 1017 10.1371/journal.pone.0147244  
38  
39  
40  
41  
42  
43  
44  
45  
46  
47  
48  
49  
50  
51  
52  
53  
54  
55  
56  
57  
58  
59  
60

1  
2 **Figure legends**  
3

4  
5 **Figure 1. Study flow diagram.**  
6

7  
8 **Figure 2. Quality of evidence for depression severity.** ADM: Antidepressant medication, CBT:  
9  
10 Cognitive Behavioural Therapy, CI: Confidence Interval, I<sup>2</sup>: Heterogeneity, MBCT: Mindfulness-based  
11  
12 Cognitive Therapy, MBSR: Mindfulness-based Stress Reduction, N.c.: Not calculable because of only  
13  
14 one included RCT, N.r.: Not reported, S-adenosyl methionine, Tau: Treatment as Usual  
15  
16

17  
18 **Figure 3. Quality of evidence for depression remission rates.** ADM: Antidepressant medication, CI:  
19  
20 Confidence Interval, I<sup>2</sup>: Heterogeneity, N.c.: Not calculable because of only one included RCT, OR:  
21  
22 Odds Ratio, RR: Risk Ratio, Tau: Treatment as Usual  
23  
24

25  
26 **Figure 4. Quality of evidence for depression response rates.** ADM: Antidepressant medication, CI:  
27  
28 Confidence Interval, I<sup>2</sup>: Heterogeneity, N.c.: Not calculable because of only one included RCT, OR:  
29  
30 Odds Ratio, RR: Risk Ratio  
31

32  
33 **Figure 5. Quality of evidence for depression relapse rates.** ADM: Antidepressant medication, CI:  
34  
35 Confidence Interval, HR: Hazard Ratio, I<sup>2</sup>: Heterogeneity, MBCT: Mindfulness-based Cognitive  
36  
37 Therapy, N.c.: Not calculable because of only one included RCT, OR: Odds Ratio, RR: Risk Ratio, Tau:  
38  
39 Treatment as Usual  
40  
41  
42  
43  
44  
45  
46  
47  
48  
49  
50  
51  
52  
53  
54  
55  
56  
57  
58  
59  
60

## Tables

**Table 1. Electronic search strategy for PubMed.**

|    |                                                                                                                                                                                                                                                                                                                                                                                                                                                                                                                                                                                                                                                                                                                                                                                                                                                                                                                                                                                                                                                                                                                                                                                                                                                                                                                                                                                                                               |
|----|-------------------------------------------------------------------------------------------------------------------------------------------------------------------------------------------------------------------------------------------------------------------------------------------------------------------------------------------------------------------------------------------------------------------------------------------------------------------------------------------------------------------------------------------------------------------------------------------------------------------------------------------------------------------------------------------------------------------------------------------------------------------------------------------------------------------------------------------------------------------------------------------------------------------------------------------------------------------------------------------------------------------------------------------------------------------------------------------------------------------------------------------------------------------------------------------------------------------------------------------------------------------------------------------------------------------------------------------------------------------------------------------------------------------------------|
| #1 | (Depression OR Depressive Disorder, Major OR Depressive Disorder, Treatment-Resistant OR Dysthymic Disorder OR Seasonal Affective Disorder)[mh]                                                                                                                                                                                                                                                                                                                                                                                                                                                                                                                                                                                                                                                                                                                                                                                                                                                                                                                                                                                                                                                                                                                                                                                                                                                                               |
| #2 | (depress* OR dysthym* or “seasonal affective” OR “affective disorder” OR “affective disorders” OR “mood disorder” OR “mood disorders”)[tiab]                                                                                                                                                                                                                                                                                                                                                                                                                                                                                                                                                                                                                                                                                                                                                                                                                                                                                                                                                                                                                                                                                                                                                                                                                                                                                  |
| #3 | (Systematic review OR Meta-analysis)[pt] OR (Systematic* OR Meta-analy*)[tiab]                                                                                                                                                                                                                                                                                                                                                                                                                                                                                                                                                                                                                                                                                                                                                                                                                                                                                                                                                                                                                                                                                                                                                                                                                                                                                                                                                |
| #4 | (Acupressure OR Acupuncture OR acid OR Alexander Technique OR alternative OR Aromatherapy OR Aroma Therapy OR Art Therap* OR ayurved* OR Balneotherapy OR Balneo Therapy OR bee OR Biofeedback OR Bio Feedback OR bright light OR Chelation Therapy OR Chinese Traditional Medicine OR Chiropractic OR Chronotherapy OR Color Therapy OR complementary OR craniosacral OR cupping OR Curcumin OR Dance Therapy OR diet OR Distant Healing OR Electroacupuncture OR Feldenkrais OR folic acid OR Folate OR Healing Touch OR herbal OR Herbs OR Homeopath* OR Honey OR Hydrotherapy OR hyperbaric oxygenation OR Hypericum perforatum OR Hyperthermia OR Hypnosis OR Imagery OR Inositol OR Kampo OR Light Therapy OR Magnesium OR Massage OR MBSR OR MBCT OR Meditation OR Mindfulness OR Morita Therapy OR Moxibustion OR Mediterranean OR Music Therap* OR Naturopathy OR Neural Therapy OR Omega-3 OR Osteopath* OR Ozone Therapy OR Phototherapy OR Pollen OR Prayer OR prebiotic* OR probiotic* OR Propolis OR Qi Gong OR Reflexology OR Reiki OR Relaxation OR Rolfing OR Royal Jelly OR S-adenosyl-L-methionine OR Saffron OR Shamanism OR Snoezelen OR Speleotherapy OR Spinal Manipulation OR Spiritual OR St John's Wort OR Supplements OR Tai Chi OR TCM OR Therapeutic Touch OR Traditional Chinese Medicine OR Tryptophan OR Tui na OR Turmeric OR vegan OR vegetarian OR venom OR Vitamin OR Yoga OR zinc)[tiab] |
| #5 | (Acupressure OR Acupuncture OR Acupuncture Therapy OR Acids OR Aromatherapy OR Art Therapy OR Balneology OR Biofeedback, Psychology OR Chelation Therapy OR Chiropractic OR Chronotherapy OR Color Therapy OR Complementary Therapies OR Crocus OR Curcuma OR Dance Therapy OR Diet OR Electroacupuncture OR Fatty Acids, Omega-3 OR Folic Acid OR Homeopathy OR Honey OR Hydrotherapy OR Hypericum OR Hyperthermia, Induced OR Hypnosis OR Imagery OR Inositol OR Magnesium OR Manipulation, Spinal OR Massage OR Medicine, Ayurvedic OR Medicine, Chinese Traditional OR Medicine, Kampo OR Meditation OR Mind-Body Therapies OR Mindfulness OR Moxibustion OR Naturopathy OR Ozone OR Phototherapy OR Plants, Medicinal OR Pollen OR Prebiotics OR Probiotics OR Propolis OR Qigong OR Relaxation OR Shamanism OR Speleotherapy OR Spiritual Therapies OR Supplements, Dietary OR Tai Ji OR Therapeutic Touch OR Tryptophan OR Venoms OR Vitamins OR Yoga OR Zinc)[mh]                                                                                                                                                                                                                                                                                                                                                                                                                                                     |
| #6 | (#1 OR #2) AND #3 AND (#4 OR #5)                                                                                                                                                                                                                                                                                                                                                                                                                                                                                                                                                                                                                                                                                                                                                                                                                                                                                                                                                                                                                                                                                                                                                                                                                                                                                                                                                                                              |



1  
2  
3  
4  
5  
6  
7  
8  
9  
10  
11  
12  
13  
14  
15  
16  
17  
18  
19  
20  
21  
22  
23  
24  
25  
26  
27  
28  
29  
30  
31  
32  
33  
34  
35  
36  
37  
38  
39  
40  
41  
42  
43  
44  
45  
46  
47  
48  
49  
50  
51  
52  
53  
54  
55  
56  
57  
58  
59  
60

**Supplementary data**

**Supplementary table 1:** Detailed AMSTAR ratings.

**Supplementary table 2:** Characteristics and outcomes of the included meta-analyses.

For peer review only



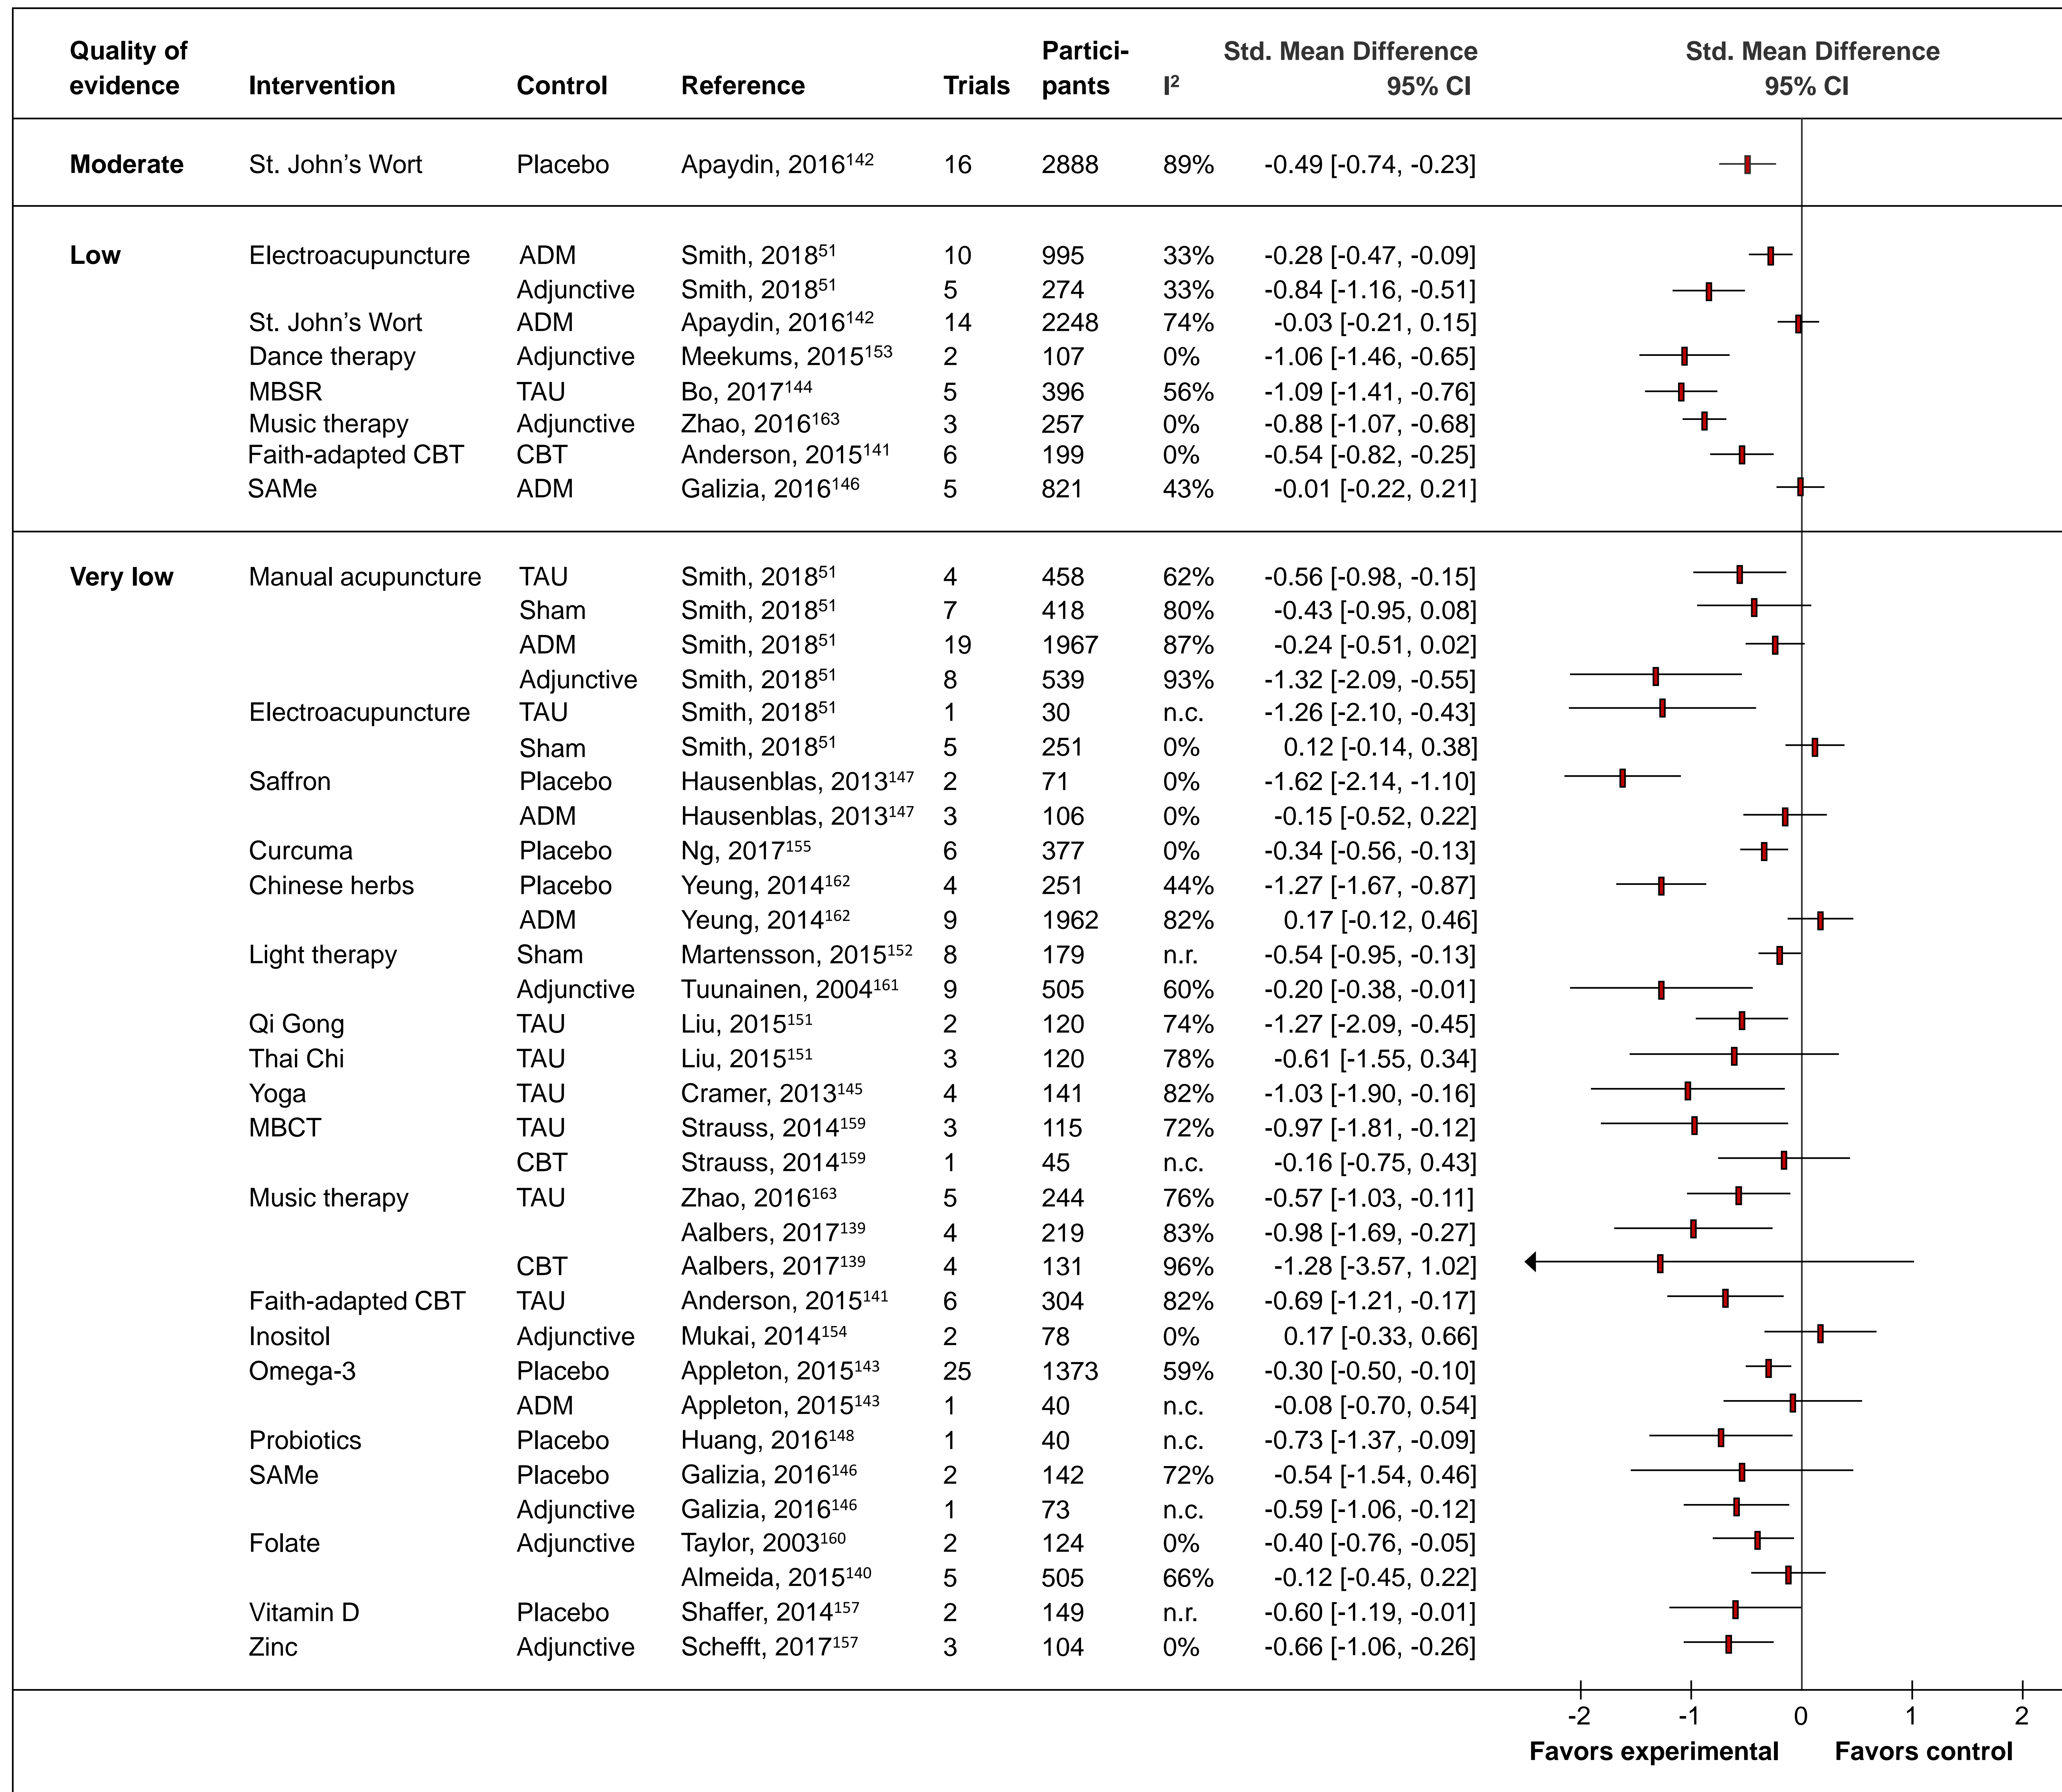

| Quality of evidence | Intervention       | Control    | Reference                     | Trials | Partici- pants | I <sup>2</sup> | Risk/Odds Ratio 95% CI | Risk/Odds Ratio 95% CI |
|---------------------|--------------------|------------|-------------------------------|--------|----------------|----------------|------------------------|------------------------|
| <b>Moderate</b>     | St. John's Wort    | ADM        | Apaydin, 2016 <sup>142</sup>  | 7      | 787            | 29%            | RR: 1.17 [0.84, 1.62]  |                        |
| <b>Low</b>          | Manual acupuncture | ADM        | Smith, 2018 <sup>51</sup>     | 19     | 1967           | 87%            | RR: 1.21 [1.06, 1.39]  |                        |
|                     | Electroacupuncture | ADM        | Smith, 2018 <sup>51</sup>     | 8      | 966            | 0%             | RR: 1.01 [0.92, 1.11]  |                        |
| <b>Very low</b>     | Manual acupuncture | TAU        | Smith, 2018 <sup>51</sup>     | 4      | 458            | 62%            | RR: 1.67 [0.77, 3.65]  |                        |
|                     |                    | Sham       | Smith, 2018 <sup>51</sup>     | 7      | 418            | 80%            | RR: 1.89 [0.75, 4.75]  |                        |
|                     |                    | Adjunctive | Smith, 2018 <sup>51</sup>     | 8      | 539            | 93%            | RR: 1.33 [0.65, 2.73]  |                        |
|                     | Electroacupuncture | Sham       | Smith, 2018 <sup>51</sup>     | 2      | 87             | 20%            | RR: 1.23 [0.35, 4.29]  |                        |
|                     |                    | Adjunctive | Smith, 2018 <sup>51</sup>     | 5      | 273            | 49%            | RR: 1.17 [0.75, 1.80]  |                        |
|                     | St. John's Wort    | Placebo    | Apaydin, 2016 <sup>142</sup>  | 9      | 1419           | 94%            | RR: 1.69 [0.63, 4.55]  |                        |
|                     | Omega-3            | ADM        | Appleton, 2015 <sup>143</sup> | 6      | 426            | 7%             | OR: 1.38 [0.87, 2.20]  |                        |



| Quality of-evidence | Intervention    | Control    | Reference                     | Trials | Partici-pants | I <sup>2</sup> | Risk/Odds Ratio 95% CI | Risk/Odds Ratio 95% CI |
|---------------------|-----------------|------------|-------------------------------|--------|---------------|----------------|------------------------|------------------------|
| <b>Moderate</b>     | St. John's Wort | Placebo    | Linde, 2008 <sup>150</sup>    | 18     | 3064          | 75%            | RR: 1.48 [1.23, 1.77]  |                        |
|                     |                 |            | Apaydin, 2016 <sup>142</sup>  | 18     | 2922          | 79%            | RR: 1.53 [1.19, 1.97]  |                        |
|                     | St. John's Wort | ADM        | Linde, 2008 <sup>150</sup>    | 17     | 2810          | 17%            | RR: 1.01 [0.93, 1.09]  |                        |
|                     |                 |            | Apaydin, 2016 <sup>142</sup>  | 17     | 2776          | 52%            | RR: 1.01 [0.90, 1.14]  |                        |
| <b>Very Low</b>     | Light therapy   | Adjunctive | Tuuainen, 2004 <sup>161</sup> | 3      | 71            | 69%            | RR: 0.94 [0.61, 1.46]  |                        |
|                     | Chinese herbs   | Placebo    | Yeung, 2014 <sup>162</sup>    | 3      | 281           | 0%             | RR: 2.99 [2.18, 4.10]  |                        |
|                     |                 | ADM        | Yeung, 2014 <sup>162</sup>    | 10     | 1653          | 42%            | RR: 1.00 [0.94, 1.07]  |                        |
|                     | Omega-3         | Placebo    | Appleton, 2015 <sup>143</sup> | 15     | 611           | 6%             | OR: 1.39 [0.95, 2.04]  |                        |
|                     |                 | ADM        | Appleton, 2015 <sup>143</sup> | 1      | 40            | n.c.           | OR: 1.23 [0.35, 4.31]  |                        |
|                     | Tryptophan      | Placebo    | Shaw, 2002 <sup>158</sup>     | 2      | 46            | 0%             | OR: 4.10 [1.28, 13.15] |                        |
|                     | Folate          | Adjunctive | Almeida, 2015 <sup>158</sup>  | 4      | 478           | 73%            | OR: 1.18 [0.49, 2.83]  |                        |

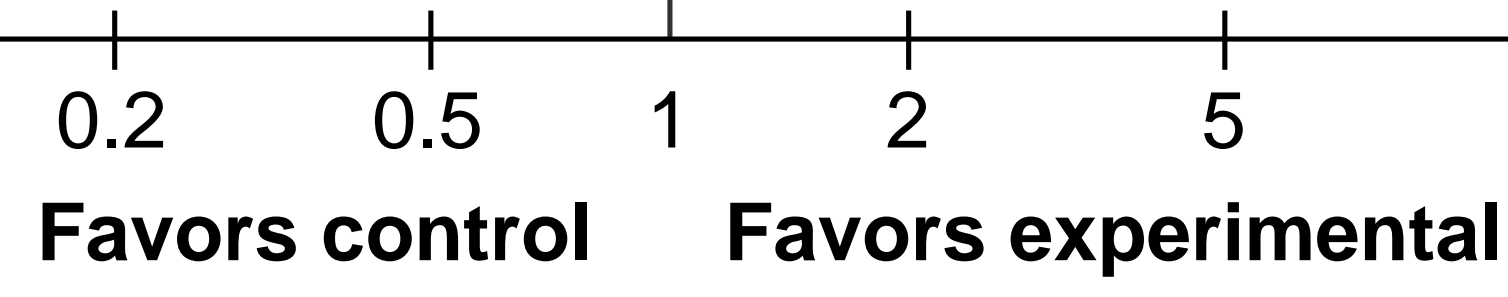

| Quality of evidence | Intervention    | Control    | Reference                    | Trials | Participants | I <sup>2</sup> | Risk/Odds/Hazard Ratio<br>95% CI | Risk/Odds/Hazard Ratio<br>95% CI |
|---------------------|-----------------|------------|------------------------------|--------|--------------|----------------|----------------------------------|----------------------------------|
| Moderate            | MBCT            | ADM        | Kuyken, 2016 <sup>149</sup>  | 4      | 669          | 0%             | HR: 0.77 [0.60, 0.98]            |                                  |
| Very low            | St. John's Wort | Placebo    | Apaydin, 2016 <sup>142</sup> | 1      | 426          | n.c.           | RR: 0.70 [0.49, 1.02]            |                                  |
|                     |                 | ADM        | Apaydin, 2016 <sup>142</sup> | 1      | 241          | n.c.           | RR: 4.17 [0.47, 33.33]           |                                  |
|                     | Folate          | Adjunctive | Almeida, 2015 <sup>140</sup> | 1      | 153          | n.c.           | OR: 0.33 [0.12, 0.94]            |                                  |

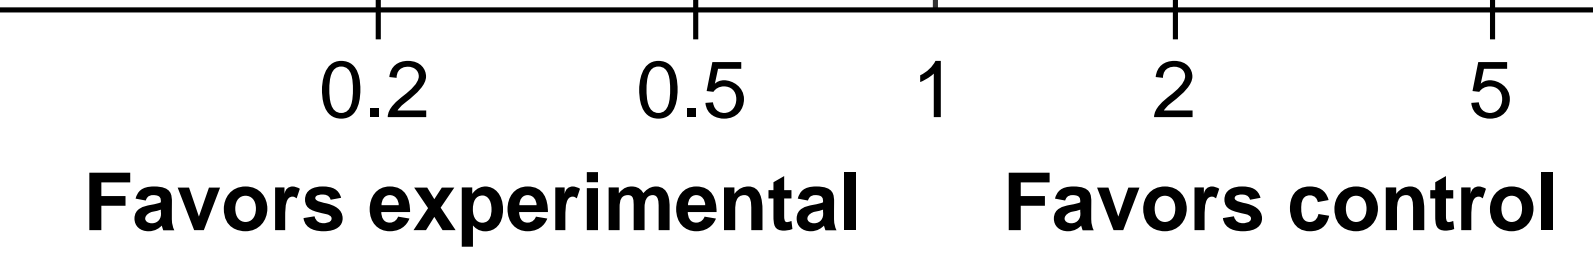

1  
2  
3  
4  
5  
6  
7  
8  
9  
10  
11  
12  
13  
14  
15  
16  
17  
18  
19  
20  
21  
22  
23  
24  
25  
26  
27  
28  
29  
30  
31  
32  
33  
34  
35  
36  
37  
38  
39  
40  
41  
42  
43  
44  
45  
46  
47  
48  
49  
50  
51  
52  
53  
54  
55  
56  
57  
58  
59  
60

Supplementary information to "Complementary therapies for clinical depression: an overview of systematic reviews" by Heidemarie Haller, Dennis Anheyer, Holger Cramer, Gustav Dobos

Supplementary table 1: Characteristics and outcomes of the included meta-analyses.

| Included meta-analysis    | Diagnosis                | Number of studies | Studies with low risk of bias | Quality of the meta-analyses                         | Instruments used | Follow-up time | Pooled treatment effects (respective latest follow-up) with quality of evidence ratings according to GRADE | Safety                                                                                                                                                                                                                                                                                                                                                                                                                                                                                                                                                                                                                                                                                                                                                                                                                                                                                                                                                                                                                                                                                                                                                                                                                                                                                                 |                                                                                                                                                                                                                                                                                                                                                                                                                                      |
|---------------------------|--------------------------|-------------------|-------------------------------|------------------------------------------------------|------------------|----------------|------------------------------------------------------------------------------------------------------------|--------------------------------------------------------------------------------------------------------------------------------------------------------------------------------------------------------------------------------------------------------------------------------------------------------------------------------------------------------------------------------------------------------------------------------------------------------------------------------------------------------------------------------------------------------------------------------------------------------------------------------------------------------------------------------------------------------------------------------------------------------------------------------------------------------------------------------------------------------------------------------------------------------------------------------------------------------------------------------------------------------------------------------------------------------------------------------------------------------------------------------------------------------------------------------------------------------------------------------------------------------------------------------------------------------|--------------------------------------------------------------------------------------------------------------------------------------------------------------------------------------------------------------------------------------------------------------------------------------------------------------------------------------------------------------------------------------------------------------------------------------|
| <b>Acupuncture</b>        |                          |                   |                               |                                                      |                  |                |                                                                                                            |                                                                                                                                                                                                                                                                                                                                                                                                                                                                                                                                                                                                                                                                                                                                                                                                                                                                                                                                                                                                                                                                                                                                                                                                                                                                                                        |                                                                                                                                                                                                                                                                                                                                                                                                                                      |
| <b>Manual acupuncture</b> | Smith 2018 <sup>51</sup> | MDD, CSD          | 49 RCTs                       | SB: 9<br>PB: 9<br>DB: 5<br>AB: 24<br>RB: 2<br>OB: 15 | AMSTAR: 10       | HAMD<br>BDI    | 1.5-12 weeks                                                                                               | Severity:<br>– Sign. greater effects than TAU (4 RCTs; SMD=-0.56; 95%CI=[-0.98,-0.15]; I <sup>2</sup> =62%; p=.03; N=458; ⊕○○○ very low <sup>a,c,d,e</sup> )<br>– No sign. effects versus invasive SHAM (7 RCTs; SMD=-0.43; 95%CI=[-0.95,0.08]; I <sup>2</sup> =80%; p<.001; N=418; ⊕○○○ very low <sup>a,c,d,e</sup> )#<br>– Similar effects as SSRI/TCA (19 RCTs; SMD=-0.24; 95%CI=[-0.51,0.02]; I <sup>2</sup> =87%; p<.001; N=1967; ⊕○○○ very low <sup>a,c,e</sup> ) <sup>§</sup><br>– Sign. greater effects as adjunctive to SSRI versus SSRI (8 RCTs; SMD=-1.32; 95%CI=[-2.09,-0.55]; I <sup>2</sup> =93%; p<.001; N=539; ⊕○○○ very low <sup>a,c,e</sup> )<br>Remission:<br>– No sign. effects versus TAU (2 RCTs; RR=1.67; 95%CI=[0.77,3.65]; I <sup>2</sup> =0%; p=.44; N=94; ⊕○○○ very low <sup>a,d,e</sup> )<br>– No sign. effects versus invasive SHAM (5 RCTs; RR=1.89; 95%CI=[0.75,4.75]; I <sup>2</sup> =63; p=.03; N=368; ⊕○○○ very low <sup>a,c,d,e</sup> )<br>– Sign. smaller effects than SSRI/TCA (18 RCTs; RR=1.21; 95%CI=[1.06,1.39]; I <sup>2</sup> =18%; p=.24; N=1952; ⊕⊕○○ low <sup>a,e</sup> ) <sup>§</sup><br>– No sign. effects as adjunctive to SSRI versus SSRI (5 RCTs; RR=1.33; 95%CI=[0.65,2.73]; I <sup>2</sup> =76%; p=.002; N=299; ⊕○○○ very low <sup>a,c,e</sup> ) | – Similar AEs as TAU (1 RCT; RR=0.89; 95%CI=[0.35,2.24]; I <sup>2</sup> =n.c.; N=320)<br>– Similar AEs as invasive SHAM (1 RCT; RR=2.5; 95%CI=[0.15,40.37]; I <sup>2</sup> =n.c.; N=17)<br>– Similar AEs adjunctive to SSRI versus SSRI (2 RCTs; SMD=-0.37; 95%CI=[-1.2,0.47]; I <sup>2</sup> =84%; N=150)<br>– Sign. less AEs than SSRI (3 RCTs; SMD=-1.75; 95%CI=[-3.17,-0.32]; I <sup>2</sup> =96%; p p<.001; N=481) <sup>#</sup> |

Supplementary table 1: continued

2

|                           | Included meta-analysis    | Diagnosis | Number of studies | Studies with low risk of bias                                  | Quality of the meta-analyses | Instruments used | Follow-up time | Pooled treatment effects (respective latest follow-up) with quality of evidence ratings according to GRADE                                                                                                                                                                                                                                                                                                                                                                                                                                                                                                                                                                                                                                                                                                                                                                                                                                                                                                                                                                                                                                                                                                                                     | Safety                                                                                                                                                                                                                                                                               |
|---------------------------|---------------------------|-----------|-------------------|----------------------------------------------------------------|------------------------------|------------------|----------------|------------------------------------------------------------------------------------------------------------------------------------------------------------------------------------------------------------------------------------------------------------------------------------------------------------------------------------------------------------------------------------------------------------------------------------------------------------------------------------------------------------------------------------------------------------------------------------------------------------------------------------------------------------------------------------------------------------------------------------------------------------------------------------------------------------------------------------------------------------------------------------------------------------------------------------------------------------------------------------------------------------------------------------------------------------------------------------------------------------------------------------------------------------------------------------------------------------------------------------------------|--------------------------------------------------------------------------------------------------------------------------------------------------------------------------------------------------------------------------------------------------------------------------------------|
| <b>Electroacupuncture</b> | Smith 2018 <sup>51</sup>  | MDD, CSD  | 21 RCTs           | SB: 6<br>PB: 3<br>DB: 5<br>AB: 16<br>RB: 1<br>OB: 12           | AMSTAR: 10                   | HAMD<br>BDI      | 2-6 weeks      | <p>Severity:</p> <ul style="list-style-type: none"> <li>– Sign. greater effects than TAU (1 RCT; SMD=-1.26; 95%CI=[-2.10,-0.43]; I<sup>2</sup>=n.c.; N=30; ⊕○○○ very low<sup>a,c,d,e</sup>)</li> <li>– No sign. effects versus invasive SHAM (5 RCTs; SMD=0.12; 95%CI=[-0.14,0.38]; I<sup>2</sup>=0%; p=.82; N=251; ⊕○○○ very low<sup>a,d,e</sup>)<sup>#</sup></li> <li>– Sign. greater effects than SSRI/TCA (10 RCTs; SMD=-0.28; 95%CI=[-0.47,-0.09]; I<sup>2</sup>=33%; p=.14; N=995; ⊕⊕○○ low<sup>a,e</sup>)<sup>§</sup></li> <li>– Sign. greater effects as adjunctive to SSRI versus SSRI (5 RCTs; SMD=-0.84; 95%CI=[-1.16,-0.51]; I<sup>2</sup>=33%; p=.20; N=274; ⊕⊕○○ low<sup>a,e</sup>)</li> </ul> <p>Remission:</p> <ul style="list-style-type: none"> <li>– No sign. effects versus invasive SHAM (2 RCTs; RR=1.23; 95%CI=[0.35,4.29]; I<sup>2</sup>=20; p=.26; N=87; ⊕○○○ very low<sup>a,d,e</sup>)</li> <li>– Similar effects as SSRI/TCA (8 RCTs; RR=1.01; 95%CI=[0.92,1.11]; I<sup>2</sup>=0%; p=.43; N=966; ⊕⊕○○ low<sup>a,e</sup>)<sup>§</sup></li> <li>– No sign. effects as adjunctive to SSRI versus SSRI (5 RCTs; RR=1.17; 95%CI=[0.75,1.80]; I<sup>2</sup>=49%; p=.10; N=273; ⊕○○○ very low<sup>a,d,e</sup>)</li> </ul> | <ul style="list-style-type: none"> <li>– Similar AEs as invasive SHAM (4 RCTs; RR=1.79; 95%CI=[0.99,3.25]; I<sup>2</sup>=16%; p=.31; N=244)</li> <li>– Sign. less AEs as adjunctive to SSRI versus SSRI (1 RCT; SMD=-3.39; 95%CI=[-4.27,-2.50]; I<sup>2</sup>=n.c.; N=50)</li> </ul> |
| <b>Herbs</b>              |                           |           |                   |                                                                |                              |                  |                |                                                                                                                                                                                                                                                                                                                                                                                                                                                                                                                                                                                                                                                                                                                                                                                                                                                                                                                                                                                                                                                                                                                                                                                                                                                |                                                                                                                                                                                                                                                                                      |
| <b>St. John's wort</b>    | Linde 2008 <sup>150</sup> | MDD       | 29 RCTs           | SB: 18<br>PB: 29<br>DB: n.r.<br>AB: 29<br>RB: n.r.<br>OB: n.r. | AMSTAR: 8                    | HAMD<br>MADRS    | 4-12 weeks     | <p>Response (50%):</p> <ul style="list-style-type: none"> <li>– Sign. greater effects than PLACEBO (18 RCTs; RR=1.48; 95%CI=[1.23,1.77]; I<sup>2</sup>=75%; p&lt;.001; N=3064; ⊕⊕⊕○ moderate<sup>c</sup>)</li> <li>– Similar effects as SSRI/TCA/TECA (17 RCTs; RR=1.01; 95%CI=[0.93,1.09]; I<sup>2</sup>=17%; p=.25; N=2810; ⊕⊕⊕○ moderate<sup>a</sup>)</li> </ul>                                                                                                                                                                                                                                                                                                                                                                                                                                                                                                                                                                                                                                                                                                                                                                                                                                                                            | <ul style="list-style-type: none"> <li>– Similar AEs as PLACEBO (14 RCTs; OR=0.98; 95%CI=[0.78,1.23]; I<sup>2</sup>=n.r.; N=2496),</li> <li>– Sign. less than ADMs (14 RCTs; OR=0.56; 95%CI=[0.43,0.74]; I<sup>2</sup>=n.r.; N=2663)</li> </ul>                                      |



Supplementary table 1: continued

|                                                                                                                                                                                                             | Included meta-analysis                | Diagnosis                      | Number of studies | Studies with low risk of bias | Quality of the meta-analyses                             | Instruments used | Follow-up time | Pooled treatment effects (respective latest follow-up) with quality of evidence ratings according to GRADE | Safety                                                                                                                                                                                                                                                                                                                                                                                                                                                                                                                                                                                                                                                                                                                                                                                                                                                                                                                                                                                                                                                                                                                                                                                     |                                                                                                                                                                                             |
|-------------------------------------------------------------------------------------------------------------------------------------------------------------------------------------------------------------|---------------------------------------|--------------------------------|-------------------|-------------------------------|----------------------------------------------------------|------------------|----------------|------------------------------------------------------------------------------------------------------------|--------------------------------------------------------------------------------------------------------------------------------------------------------------------------------------------------------------------------------------------------------------------------------------------------------------------------------------------------------------------------------------------------------------------------------------------------------------------------------------------------------------------------------------------------------------------------------------------------------------------------------------------------------------------------------------------------------------------------------------------------------------------------------------------------------------------------------------------------------------------------------------------------------------------------------------------------------------------------------------------------------------------------------------------------------------------------------------------------------------------------------------------------------------------------------------------|---------------------------------------------------------------------------------------------------------------------------------------------------------------------------------------------|
| 1<br>2<br>3<br>4<br>5<br>6<br>7<br>8<br>9<br>10<br>11<br>12<br>13<br>14<br>15<br>16<br>17<br>18<br>19<br>20<br>21<br>22<br>23<br>24<br>25<br>26<br>27<br>28<br>29<br>30<br>31<br>32<br>33<br>34<br>35<br>36 | <b>St. John's wort</b><br>(continued) | Apaydin 2016 <sup>142</sup>    | MDD               | 35 RCTs                       | SB: 9<br>PB: 27<br>DB: 5<br>AB: 26<br>RB: 3<br>OB: 33    | AMSTAR: 9        | HAMD           | 4-32 weeks                                                                                                 | Severity:<br>– Sign. greater effects than PLACEBO (16 RCTs; SMD=-0.49; 95%CI=[-0.74,-0.23]; I <sup>2</sup> =89%; p=n.r.; N=2888; ⊕⊕⊕○ moderate <sup>c</sup> )<br>– Similar effects as ADM (14 RCTs; SMD=-0.03; 95%CI=[-0.21,0.15]; I <sup>2</sup> =74%; p=n.r.; N=2248; ⊕⊕○○ low <sup>a,c</sup> )<br>Response (50%):<br>– Sign. greater effects than PLACEBO (18 RCTs; RR=1.53; 95%CI=[1.19,1.97]; I <sup>2</sup> =79%; p=n.r.; N=2922; ⊕⊕⊕○ moderate <sup>c</sup> )<br>– Similar effects as ADM (17 RCTs; RR=1.01; 95%CI=[0.90,1.14]; I <sup>2</sup> =52%; p=n.r.; N=2776; ⊕⊕⊕○ moderate <sup>a</sup> )<br>Remission:<br>– No sign. effects versus PLACEBO (9 RCTs; RR=1.69; 95%CI=[0.63,4.55]; I <sup>2</sup> =94%; p=n.r.; N=1419; ⊕○○○ very low <sup>a,c,d</sup> )<br>– Similar effects as ADM (7 RCTs; RR=1.17; 95%CI=[0.84,1.62]; I <sup>2</sup> =29%; p=n.r.; N=787; ⊕⊕⊕○ moderate <sup>a</sup> )<br>Relapse:<br>– No sign. effects versus PLACEBO (1 RCT; RR=0.70; 95%CI=[0.49,1.02]; I <sup>2</sup> =n.c.; N=426; ⊕○○○ very low <sup>a,c,d</sup> )<br>– Similar effects as ADM (1 RCT; RR=4.17; 95%CI=[0.47,33.33]; I <sup>2</sup> =n.c.; N=241; ⊕○○○ very low <sup>a,c,d</sup> ) | – Similar AEs as PLACEBO (13 RCTs; OR=0.83; 95%CI=[0.62,1.13]; I <sup>2</sup> =n.r.; N=2600),<br>– Sign. less than ADMs (11 RCTs; OR=0.67; 95%CI=[0.56,0.81]; I <sup>2</sup> =n.r.; N=1946) |
| 37<br>38<br>39<br>40<br>41<br>42<br>43<br>44<br>45<br>46                                                                                                                                                    | <b>Saffron</b>                        | Hausenblas 2013 <sup>147</sup> | MDD               | 5 RCTs                        | SB: 5<br>PB: 5<br>DB: 5<br>AB: 5<br>RB: n.r.<br>OB: n.r. | AMSTAR: 7        | HAMD           | 6-8 weeks                                                                                                  | Severity:<br>– Sign. greater effects than PLACEBO (2 RCTs; SMD=-1.62; 95%CI=[-2.14,-1.10]; I <sup>2</sup> =0%; p=n.r.; N=71; ⊕○○○ very low <sup>c,d,e</sup> )<br>– Similar effects as SSRI/TCA (3 RCTs; SMD=-0.15; 95%CI=[-0.52,0.22]; I <sup>2</sup> =0%; p=n.r.; N=106; ⊕○○○ very low <sup>c,d,e</sup> )                                                                                                                                                                                                                                                                                                                                                                                                                                                                                                                                                                                                                                                                                                                                                                                                                                                                                 | – No serious AEs                                                                                                                                                                            |

Supplementary table 1: continued

|                           | Included meta-analysis         | Diagnosis | Number of studies | Studies with low risk of bias                             | Quality of the meta-analyses | Instruments used | Follow-up time  | Pooled treatment effects (respective latest follow-up) with quality of evidence ratings according to GRADE                                                                                                                                                                                                                                                                                                                                                                                                                                                                                                                                      | Safety                                                                                                                                                                                                        |
|---------------------------|--------------------------------|-----------|-------------------|-----------------------------------------------------------|------------------------------|------------------|-----------------|-------------------------------------------------------------------------------------------------------------------------------------------------------------------------------------------------------------------------------------------------------------------------------------------------------------------------------------------------------------------------------------------------------------------------------------------------------------------------------------------------------------------------------------------------------------------------------------------------------------------------------------------------|---------------------------------------------------------------------------------------------------------------------------------------------------------------------------------------------------------------|
| <b>Curcuma</b>            | Ng 2017 <sup>155</sup>         | MDD, CSD  | 6 RCTs            | SB: 3<br>PB: 3<br>DB: 3<br>AB: 2<br>RB: 2<br>OB: 1        | AMSTAR: 6                    | HAMD, BDI        | 4-8 weeks       | Severity:<br>– Sign. greater effects than PLACEBO (6 RCTs; SMD=-0.34; 95%CI=[-0.56,-0.13]; I <sup>2</sup> =0%; p=.82; N=377; ⊕○○○ very low <sup>a,d,e</sup> )                                                                                                                                                                                                                                                                                                                                                                                                                                                                                   | – No serious AEs                                                                                                                                                                                              |
| <b>Chinese herbs</b>      | Yeung 2014 <sup>162</sup>      | MND       | 21 RCTs           | SB: 5<br>PB: 11<br>DB: 9<br>AB: 21<br>RB: 20<br>OB: 18    | AMSTAR: 4                    | HAMD             | 6-8,5 weeks     | Severity:<br>– Sign. greater effects than PLACEBO (4 RCTs; SMD=-1.27; 95%CI=[-1.67,-0.87]; I <sup>2</sup> =44%; p=.14; N=251; ⊕○○○ very low <sup>b,e</sup> )#<br>– Similar effects as SSRI/SNRI/TCA/TECA (9 RCTs; SMD=0.17; 95%CI=[-0.12,0.46]; I <sup>2</sup> =82%; p<.001; N=1962; ⊕○○○ very low <sup>b,c,e</sup> )#<br>Response (30%):<br>– Sign. greater effects than PLACEBO (3 RCTs; RR=2.99; 95%CI=[2.18,4.10]; I <sup>2</sup> =0%; p=.53; N=281; ⊕○○○ very low <sup>c,d,e</sup> )<br>– Similar effects as SSRI/SNRI/TCA/TECA (10 RCTs; RR=1.00; 95%CI=[0.94,1.07]; I <sup>2</sup> =42%; p=.08; N=1635; ⊕○○○ very low <sup>b,c,e</sup> ) | – Similar AEs as PLACEBO (3 RCTs; RR=1.29; 95%CI=[0.86,1.95]; I <sup>2</sup> =61%; p= n.r.; N=n.r.)<br>– Sign. less AEs than ADMs (29 RCTs; RR=0.23; 95%CI=[0.16,0.33]; I <sup>2</sup> =59%; p= n.r.; N=n.r.) |
| <b>Light therapy</b>      |                                |           |                   |                                                           |                              |                  |                 |                                                                                                                                                                                                                                                                                                                                                                                                                                                                                                                                                                                                                                                 |                                                                                                                                                                                                               |
| <b>Bright white light</b> | Tuunainen 2004 <sup>161</sup>  | MND       | 18                | SB: 2<br>PB: 0<br>DB: 13<br>AB: 1<br>RB: n.r.<br>OB: n.r. | AMSTAR: 9                    | HAMD, GDS        | 1 day - 8 weeks | Severity:<br>– Sign. greater effects than adjunctive to ADM than SHAM + ADM (18 RCTs; SMD=-0.20; 95%CI=[-0.38,-0.01]; I <sup>2</sup> =60%; p<.001; N=505; ⊕○○○ very low <sup>a,c,d</sup> )<br>Response:<br>– No effects than adjunctive to ADM than SHAM + ADM (3 RCTs; RR=0.94; 95%CI=[0.61,1.46]; I <sup>2</sup> =69%; p=.004; N=71; ⊕○○○ very low <sup>a,c,d</sup> )                                                                                                                                                                                                                                                                         | – No serious AEs                                                                                                                                                                                              |
|                           | Martensson 2015 <sup>152</sup> | SAD       | 8 RCTs            | N.r.                                                      | AMSTAR: 5                    | HAMD, SIGH-SAD   | 2-6 weeks       | Severity:<br>– Sign. greater effects than SHAM (8 RCTs; SMD=-0.54; 95%CI=[-0.95,-0.13]; I <sup>2</sup> =n.r.; N=179; ⊕○○○ very low <sup>b,c,d,e</sup> )                                                                                                                                                                                                                                                                                                                                                                                                                                                                                         | – N.r.                                                                                                                                                                                                        |

Supplementary table 1: continued

|                                        | Included meta-analysis      | Diagnosis | Number of studies | Studies with low risk of bias                      | Quality of the meta-analyses | Instruments used    | Follow-up time | Pooled treatment effects (respective latest follow-up) with quality of evidence ratings according to GRADE                                                                                                                                                                                                                | Safety           |
|----------------------------------------|-----------------------------|-----------|-------------------|----------------------------------------------------|------------------------------|---------------------|----------------|---------------------------------------------------------------------------------------------------------------------------------------------------------------------------------------------------------------------------------------------------------------------------------------------------------------------------|------------------|
| <b>Meditative movement therapies</b>   |                             |           |                   |                                                    |                              |                     |                |                                                                                                                                                                                                                                                                                                                           |                  |
| <b>Dance therapy</b>                   | Meekums 2015 <sup>153</sup> | MND       | 2 RCTs            | SB: 1<br>PB: 0<br>DB: 1<br>AB: 2<br>RB: 2<br>OB: 1 | AMSTAR: 9                    | HAMD                | 4-12 weeks     | Severity:<br>– Sign. greater effects as adjunctive to ADM versus ADM (2 RCTs; SMD=-1.06; 95%CI=[-1.46,-0.65]; I <sup>2</sup> =0%; p=.70; N=107; ⊕⊕○○ low <sup>d,cj</sup> #                                                                                                                                                | – No serious AEs |
| <b>Qi Gong and Tai Chi</b>             | Liu 2015 <sup>151</sup>     | MDD, CSD  | 5 RCTs            | N.r.                                               | AMSTAR: 4                    | HAMD, GDS, CESD     | 10-16 weeks    | Severity:<br>– Sign. greater effects than TAU for Qi Gong (2 RCTs; SMD=-1.27; 95%CI=[-2.09,-0.45]; I <sup>2</sup> =74%; p=.05; N=120; ⊕○○○ very low <sup>b,c,d,e</sup> )* but no sign. effects for Tai Chi (3 RCTs; SMD=-0.61; 95%CI=[-1.55,0.34]; I <sup>2</sup> =78%; p=.01; N=120; ⊕○○○ very low <sup>b,c,d,e</sup> )* | – N.r.           |
| <b>Yoga</b>                            | Cramer 2013 <sup>145</sup>  | MDD, CSD  | 5 RCTs            | SB: 0<br>PB: 0<br>DB: 1<br>AB: 1<br>RB: 5<br>OB: 3 | AMSTAR: 8                    | HAMD, ZGS, GDS, BDI | 4-8 weeks      | Severity:<br>– Sign. greater effects than TAU (4 RCTs; SMD=-1.03; 95%CI=[-1.90,-0.16]; I <sup>2</sup> =82%; p<.001; N=141; ⊕○○○ very low <sup>a,c,d,e</sup> )*<br>– Sign. greater effects than EXERCISE (2 RCTs; SMD=-0.59; 95%CI=[-1.90,-0.16]; I <sup>2</sup> =68%; p=.08; N=108; ⊕○○○ very low <sup>a,c,d,e</sup> )    | – N.r.           |
| <b>Mindfulness-based interventions</b> |                             |           |                   |                                                    |                              |                     |                |                                                                                                                                                                                                                                                                                                                           |                  |
| <b>MBCT</b>                            | Strauss 2014 <sup>159</sup> | MDD       | 4 RCTs            | N.r.                                               | AMSTAR: 5                    | HAMD, BDI           | 8-12 weeks     | Severity:<br>– Sign. greater effects than TAU (3 RCTs; SMD=-0.97; 95%CI=[-1.81,-0.12]; I <sup>2</sup> =72%; p=.03; N=115; ⊕○○○ very low <sup>b,c,d</sup> ) <sup>§</sup><br>– Similar effects as CBT (1 RCT; SMD=-0.16; 95%CI=[-0.75,0.43]; I <sup>2</sup> =n.c.; N=45; ⊕○○○ very low <sup>b,c,d</sup> ) <sup>§</sup>      | – N.r.           |

Supplementary table 1: continued

6

|                            | Included meta-analysis      | Diagnosis | Number of studies | Studies with low risk of bias                         | Quality of the meta-analyses | Instruments used | Follow-up time | Pooled treatment effects (respective latest follow-up) with quality of evidence ratings according to GRADE                                                                                                                                                                                                                    | Safety                                                                                |
|----------------------------|-----------------------------|-----------|-------------------|-------------------------------------------------------|------------------------------|------------------|----------------|-------------------------------------------------------------------------------------------------------------------------------------------------------------------------------------------------------------------------------------------------------------------------------------------------------------------------------|---------------------------------------------------------------------------------------|
| <b>MBCT</b><br>(continued) | Kuyken 2016 <sup>149</sup>  | MDD       | 4 RCTs            | SB: 4<br>PB: 0<br>DB: 3<br>AB: 4<br>RB: 4<br>OB: 4    | AMSTAR: 6                    | SCID, BDI        | 60 weeks       | Relapse:<br>– Sign. greater effects than ADM (4 RCTs; HR=0.77; 95%CI=[0.60,0.98]; I <sup>2</sup> =0%; p=.92; N=669; ⊕⊕⊕○ moderate <sup>d</sup> )                                                                                                                                                                              | – No serious AEs                                                                      |
| <b>MBSR</b>                | Bo 2017 <sup>144</sup>      | CSD       | 5 RCTs            | SB: 0<br>PB: 0<br>DB: 1<br>AB: 5<br>RB: 5<br>OB: n.r. | AMSTAR: 6                    | HAMD, GDS        | 8-12 weeks     | Severity:<br>– Sign. greater effects than TAU/enhanced TAU (5 RCTs; SMD=-1.09; 95%CI=[-1.41,-0.76]; I <sup>2</sup> =56%; p=.06; N=396; ⊕⊕○○ low <sup>a,c</sup> )                                                                                                                                                              | – N.r.                                                                                |
| <b>Music therapy</b>       |                             |           |                   |                                                       |                              |                  |                |                                                                                                                                                                                                                                                                                                                               |                                                                                       |
| <b>Music therapy</b>       | Zhao 2016 <sup>163</sup>    | MND       | 8 RCTs            | SB: 0<br>PB: 0<br>DB: 0<br>AB: 8<br>RB: 7<br>OB: 8    | AMSTAR: 7                    | HAMD, GDS, HADS  | 4-52 weeks     | Severity:<br>– Sign. greater effects than TAU (5 RCTs; SMD=-0.57; 95%CI=[-1.03,-0.11]; I <sup>2</sup> =76%; p<.001; N=244; ⊕○○○ very low <sup>a,c,d</sup> )*<br>– Sign. greater effects as adjunctive to ADM versus ADM (3 RCTs; SMD=-0.88; 95%CI=[-1.07,-0.68]; I <sup>2</sup> =0%; p=.63; N=257; ⊕⊕○○ low <sup>a,e</sup> )* | – N.r.                                                                                |
|                            | Aalbers 2017 <sup>139</sup> | MDD, CSD  | 8 RCTs            | SB: 2<br>PB: 1<br>DB: 1<br>AB: 7<br>RB: 2<br>OB: 3    | AMSTAR: 11                   | HAMD             | 12 weeks       | Severity:<br>– Sign. greater effects than TAU (4 RCTs; SMD=-0.98; 95%CI=[-1.69,-0.27]; I <sup>2</sup> =83%; p<.001; N=219; ⊕○○○ very low <sup>a,c,d</sup> )<br>– Similar effects as CBT (4 RCTs; SMD=-1.28; 95%CI=[-3.57,1.02]; I <sup>2</sup> =96%; p<.001; N=131; ⊕○○○ very low <sup>a,c,d</sup> )                          | – Similar AEs as TAU (1 RCT; OR=0.45; 95%CI=[0.02,11.46]; I <sup>2</sup> =n.c.; N=79) |

Supplementary table 1: continued

|                                      | Included meta-analysis       | Diagnosis | Number of studies | Studies with low risk of bias                          | Quality of the meta-analyses | Instruments used                 | Follow-up time | Pooled treatment effects (respective latest follow-up) with quality of evidence ratings according to GRADE                                                                                                                                                                                                                                                                                                                                                                                                                                                                                                                                                                                                                                                         | Safety                                                                                              |
|--------------------------------------|------------------------------|-----------|-------------------|--------------------------------------------------------|------------------------------|----------------------------------|----------------|--------------------------------------------------------------------------------------------------------------------------------------------------------------------------------------------------------------------------------------------------------------------------------------------------------------------------------------------------------------------------------------------------------------------------------------------------------------------------------------------------------------------------------------------------------------------------------------------------------------------------------------------------------------------------------------------------------------------------------------------------------------------|-----------------------------------------------------------------------------------------------------|
| <b>Religious/spiritual therapies</b> |                              |           |                   |                                                        |                              |                                  |                |                                                                                                                                                                                                                                                                                                                                                                                                                                                                                                                                                                                                                                                                                                                                                                    |                                                                                                     |
| <b>Faith-adapted CBT</b>             | Anderson 2015 <sup>141</sup> | MDD, CSD  | 9 RCTs            | SB: 0<br>PB: 0<br>DB: 4<br>AB: 4<br>RB: 9<br>OB: 0     | AMSTAR: 7                    | N.r.                             | N.r.           | Severity:<br>– Sign. greater effects than TAU (6 RCTs; SMD=-0.69; 95%CI=[-1.21,-0.17]; I <sup>2</sup> =82%; p=.004; N=304; ⊕○○○ very low <sup>a,c,d</sup> ) <sup>§</sup><br>– Sign. greater effects than CBT (6 RCTs; SMD=-0.54; 95%CI=[-0.82,-0.25]; I <sup>2</sup> =0%; p=.78; N=199; ⊕⊕○○ low <sup>a,e</sup> ) <sup>§</sup>                                                                                                                                                                                                                                                                                                                                                                                                                                     | – N.r.                                                                                              |
| <b>Supplements</b>                   |                              |           |                   |                                                        |                              |                                  |                |                                                                                                                                                                                                                                                                                                                                                                                                                                                                                                                                                                                                                                                                                                                                                                    |                                                                                                     |
| <b>Inositol</b>                      | Mukai 2014 <sup>155</sup>    | MDD       | 2 RCTs            | N.r.                                                   | AMSTAR: 4                    | HAMD                             | 4 weeks        | Severity:<br>– No sign. effects as adjunctive to SSRI versus PLACEBO + SSRI (2 RCTs; SMD=0.17; 95%CI=[-0.33,0.66]; I <sup>2</sup> =0%; p=.93; N=78; ⊕○○○ very low <sup>b,d,e</sup> )                                                                                                                                                                                                                                                                                                                                                                                                                                                                                                                                                                               | – Similar AEs as adjunctive to ADM (1 RCT; RR=3.21; 95%CI=[0.14,72.55]; I <sup>2</sup> =n.c.; N=36) |
| <b>Omega-3 fatty acids</b>           | Appleton 2015 <sup>143</sup> | MDD       | 26 RCTs           | SB: 15<br>PB: 6<br>DB: 19<br>AB: 8<br>RB: 16<br>OB: 25 | AMSTAR: 9                    | HAMD, MADRS, BDI, GDS, HSCL, IDS | 4-16 weeks     | Severity:<br>– Sign. greater effects than PLACEBO (25 RCTs; SMD=-0.30; 95%CI=[-0.50,-0.10]; I <sup>2</sup> =59%; p<.001; N=1373; ⊕○○○ very low <sup>a,c,d,e</sup> )<br>– Similar effects as SSRI (1 RCT; SMD=-0.08; 95%CI=[-0.70,0.54]; I <sup>2</sup> =n.c.; N=40; ⊕○○○ very low <sup>a,c,d,e</sup> )<br>Response (50%):<br>– No sign. effects versus PLACEBO (15 RCTs; OR=1.39; 95%CI=[0.95,2.04]; I <sup>2</sup> =6%; p=.38; N=611; ⊕○○○ very low <sup>a,d,e</sup> )<br>– Similar effects as SSRI (1 RCT; OR=1.23; 95%CI=[0.35,4.31]; I <sup>2</sup> =n.c.; N=40; ⊕○○○ very low <sup>a,c,d,e</sup> )<br>Remission:<br>– No sign. effects versus PLACEBO (6 RCTs; OR=1.38; 95%CI=[0.87,2.20]; I <sup>2</sup> =7%; p=.37; N=426; ⊕○○○ very low <sup>a,d,e</sup> ) | – Similar AEs as PLACEBO (19 RCT; OR=1.24; 95%CI=[0.95,1.62]; I <sup>2</sup> =0%; p=.66; N=1207)    |

Supplementary table 1: continued

|                              | Included meta-analysis      | Diagnosis | Number of studies | Studies with low risk of bias                               | Quality of the meta-analyses | Instruments used | Follow-up time | Pooled treatment effects (respective latest follow-up) with quality of evidence ratings according to GRADE                                                                                                                                                                                                                                                                                                                                                                                     | Safety                                                                                                                                                                                                                                                                                    |
|------------------------------|-----------------------------|-----------|-------------------|-------------------------------------------------------------|------------------------------|------------------|----------------|------------------------------------------------------------------------------------------------------------------------------------------------------------------------------------------------------------------------------------------------------------------------------------------------------------------------------------------------------------------------------------------------------------------------------------------------------------------------------------------------|-------------------------------------------------------------------------------------------------------------------------------------------------------------------------------------------------------------------------------------------------------------------------------------------|
| <b>Probiotics</b>            | Huang 2016 <sup>148</sup>   | MDD       | 1 RCTs            | SB: 1<br>PB: 1<br>DB: 1<br>AB: 1<br>RB: 1<br>OB: 1          | AMSTAR: 7                    | BDI              | 8 weeks        | Severity:<br>– Sign. greater effects than PLACEBO (1 RCT; SMD=-0.73; 95%CI=[-1.37,-0.09]; I <sup>2</sup> =n.c.; N=40; ⊕○○○ very low <sup>c,d,e</sup> )                                                                                                                                                                                                                                                                                                                                         | – N.r.                                                                                                                                                                                                                                                                                    |
| <b>S-adenosyl methionine</b> | Galizia 2016 <sup>146</sup> | MDD       | 8 RCTs            | SB: 2<br>PB: 4<br>DB: 4<br>AB: 3<br>RB: 8<br>OB: 8          | AMSTAR: 9                    | HAMD             | 6-12 weeks     | Severity:<br>– No sign. effects versus PLACEBO (2 RCTs; SMD=-0.54; 95%CI=[-1.54,0.46]; I <sup>2</sup> =72%; p=.06; N=142; ⊕○○○ very low <sup>c,d,e</sup> )<br>– Similar effects as SSRI/TCA (5 RCTs; SMD=-0.01; 95%CI=[-0.22,0.21]; I <sup>2</sup> =43%; p=.14; N=821; ⊕⊕○○ low <sup>a,e</sup> ) <sup>§</sup><br>– Sign. effects as adjunctive to SSRI versus PLACEBO + SSRI (1 RCT; SMD=-0.59; 95%CI=[-1.06,-0.12]; I <sup>2</sup> =n.c.; N=73; ⊕○○○ very low <sup>c,d,e</sup> ) <sup>#</sup> | – Similar AEs as PLACEBO (2 RCTs; RR=0.70; 95%CI=[0.16,3.01]; I <sup>2</sup> =n.r.; N=142)<br>– Similar AEs as adjunctive to ADM (1 RCT, RR=0.58; 95%CI=[0.10,3.28]; I <sup>2</sup> =n.c.; N=73)<br>– Similar AEs as ADM (2 RCTs, RR=0.75; 95%CI=[0.20,2.79]; I <sup>2</sup> =n.r.; N=52) |
| <b>Tryptophan</b>            | Shaw 2002 <sup>158</sup>    | CSD       | 2 RCTs            | SB: 2<br>PB: 2<br>DB: n.r.<br>AB: 1<br>RB: n.r.<br>OB: n.r. | AMSTAR: 7                    | HAMD             | 3-12 weeks     | Response:<br>– Sign. greater effects than PLACEBO (2 RCTs; OR=4.10; 95%CI=[1.28,13.15]; I <sup>2</sup> =0%; p=.32; N=46; ⊕○○○ very low <sup>a,d,e</sup> )                                                                                                                                                                                                                                                                                                                                      | – Sign. greater AEs than PLACEBO (2 RCTs; OR=7.41; 95%CI=[1.01,54.19]; I <sup>2</sup> =0%; p=1.0; N=64)                                                                                                                                                                                   |
| <b>Vitamin B9 (Folate)</b>   | Taylor 2003 <sup>160</sup>  | MDD       | 2 RCTs            | SB: 0<br>PB: 2<br>DB: n.r.<br>AB: 2<br>RB: n.r.<br>OB: n.r. | AMSTAR: 8                    | HAMD             | 10-24 weeks    | Severity:<br>– Sign. greater effects as adjunctive to SSRI versus PLACEBO + SSRI (2 RCTs; SMD=-0.40; 95%CI=[-0.76,-0.05]; I <sup>2</sup> =0%; p=.96; N=124; ⊕○○○ very low <sup>a,c,d,e</sup> ) <sup>#</sup>                                                                                                                                                                                                                                                                                    | – Similar AEs as PLACEBO (1 RCT; RR=0.76; 95%CI=[0.55,1.05]; I <sup>2</sup> =n.c.; N=127)                                                                                                                                                                                                 |

Supplementary table 1: continued

|                                                                                                                                                                                                                                                                                                                                                                                                                                                                                                                                                                                                                                                                                                                                                                                                                                                                                                                                                                                                                                                                                                                                                                                                                                                                                                                                                                                                                                                                                                                                                                             | Included meta-analysis      | Diagnosis | Number of studies | Studies with low risk of bias                            | Quality of the meta-analyses | Instruments used | Follow-up time | Pooled treatment effects (respective latest follow-up) with quality of evidence ratings according to GRADE                                                                                                                                                                                                                                                                                                                                                                                                                                                                   | Safety |
|-----------------------------------------------------------------------------------------------------------------------------------------------------------------------------------------------------------------------------------------------------------------------------------------------------------------------------------------------------------------------------------------------------------------------------------------------------------------------------------------------------------------------------------------------------------------------------------------------------------------------------------------------------------------------------------------------------------------------------------------------------------------------------------------------------------------------------------------------------------------------------------------------------------------------------------------------------------------------------------------------------------------------------------------------------------------------------------------------------------------------------------------------------------------------------------------------------------------------------------------------------------------------------------------------------------------------------------------------------------------------------------------------------------------------------------------------------------------------------------------------------------------------------------------------------------------------------|-----------------------------|-----------|-------------------|----------------------------------------------------------|------------------------------|------------------|----------------|------------------------------------------------------------------------------------------------------------------------------------------------------------------------------------------------------------------------------------------------------------------------------------------------------------------------------------------------------------------------------------------------------------------------------------------------------------------------------------------------------------------------------------------------------------------------------|--------|
| <b>Vitamin B9 (Folate)</b><br>(continued)                                                                                                                                                                                                                                                                                                                                                                                                                                                                                                                                                                                                                                                                                                                                                                                                                                                                                                                                                                                                                                                                                                                                                                                                                                                                                                                                                                                                                                                                                                                                   | Almeida 2015 <sup>140</sup> | MDD       | 5 RCTs            | SB: 4<br>PB: 5<br>DB: 4<br>AB: 3<br>RB: 4<br>OB: 1       | AMSTAR: 6                    | HAMD, MADRS      | 4-52 weeks     | Severity:<br>– No sign. effects as adjunctive to SSRI versus PLACEBO + SSRI (5 RCTs; SMD=-0.12; 95%CI=[-0.45,0.22]; I <sup>2</sup> =66%; p=.02; N=505; ⊕○○○ very low <sup>c,d,e</sup> )<br>Response (50%):<br>– No sign. effects as adjunctive to SSRI versus PLACEBO + SSRI (4 RCTs; OR=1.18; 95%CI=[0.49,2.83]; I <sup>2</sup> =73%; p=.001; N=478; ⊕○○○ very low <sup>c,d,e</sup> )<br>Relapse:<br>– Sign. greater effects as adjunctive to SSRI versus PLACEBO + SSRI (1 RCT, OR=0.33; 95%CI=[0.12, 0.94]; I <sup>2</sup> =n.c.; N=153; ⊕○○○ very low <sup>c,d,e</sup> ) | – N.r. |
| <b>Vitamin D</b>                                                                                                                                                                                                                                                                                                                                                                                                                                                                                                                                                                                                                                                                                                                                                                                                                                                                                                                                                                                                                                                                                                                                                                                                                                                                                                                                                                                                                                                                                                                                                            | Shaffer 2014 <sup>157</sup> | MDD, CSD  | 2 RCTs            | SB: 0<br>PB: 0<br>DB: 1<br>AB: 0<br>RB: n.r.<br>OB: n.r. | AMSTAR: 7                    | HAMD, BDI        | 8 weeks        | Severity:<br>– Sign. greater effects than PLACEBO (2 RCTs; SMD=-0.60; 95%CI=[-1.19,-0.01]; I <sup>2</sup> =n.r.; N=149; ⊕○○○ very low <sup>a,c,d,e</sup> )                                                                                                                                                                                                                                                                                                                                                                                                                   | – N.r. |
| <b>Zinc</b>                                                                                                                                                                                                                                                                                                                                                                                                                                                                                                                                                                                                                                                                                                                                                                                                                                                                                                                                                                                                                                                                                                                                                                                                                                                                                                                                                                                                                                                                                                                                                                 | Schefft 2017 <sup>156</sup> | MDD       | 3 RCTs            | N.r.                                                     | AMSTAR: 5                    | HAMD, BDI        | 6-12 weeks     | Severity:<br>– Sign. greater effects as adjunctive to SSRI/TCA versus SSRI/TCA (3 RCTs; SMD=-0.66; 95%CI=[-1.06,-0.26]; I <sup>2</sup> =0%; p=.45; N=104; ⊕○○○ very low <sup>b,d,e</sup> )                                                                                                                                                                                                                                                                                                                                                                                   | – N.r. |
| Abbreviations: AB: Attrition bias; ADM: Antidepressant medication; AE: Adverse events; AMSTAR: Assessment of the Methodological Quality of Systematic Reviews tool; BDI: Beck Depression Inventory; CBT: Cognitive Behavioral Therapy; CESD: Center for Epidemiologic Studies Depression Scale; CSD: Clinical symptoms of depression (questionnaire based diagnosis); DB: Detection bias; GDS: Geriatric Depression Scale; HADS: Hospital Anxiety and Depression Scale; HAMD: Hamilton Rating Scale for Depression; HR: Hazard ratio; HSCL: Hopkins Symptom Checklist Depression Scale; I <sup>2</sup> : Heterogeneity; IDS: Inventory of Depressive Symptomology; MADRS: Montgomery-Asberg Depression Rating Scale; MBCT: Mindfulness-based Cognitive Therapy; MBSR: Mindfulness-based Stress Reduction; MDD: Major depressive disorder; MND: Mixed non-seasonal depression; N: Number of patients; N.c.: Not calculable because of only one included RCT; N.r.: Not reported; OB: Other bias; OR: Odds ratio; PB: Performance bias; RCT: Randomized controlled trial; RB: Reporting bias; RR: Risk ratio; SAD: Seasonal Affective Disorder; SB: Selection bias; SCID: Structured Clinical Interview; SIGH-SAD: Structured Interview Guide for the Hamilton Depression Rating Scale-Seasonal Affective Disorders; SMD: Standard mean difference; SSRI: Selective serotonin reuptake inhibitors; SNRI: Serotonin-norepinephrine reuptake inhibitor; TAU: Treatment as usual; TCA: Tricyclic antidepressants; TECA: Tetracyclic antidepressants; ZGS: Zung Depression Scale. |                             |           |                   |                                                          |                              |                  |                |                                                                                                                                                                                                                                                                                                                                                                                                                                                                                                                                                                              |        |

## Supplementary table 1: continued

10

## Notes:

\*Newly calculated effect measure of selected RCTs meeting eligibility criteria;

#Newly calculated effect measure from mean differences (MDs);

§Newly calculated effect measure from originally separate/combined analyses.

<sup>a</sup>Downgraded one level because of study limitations (overall unclear or high risk of bias);

<sup>b</sup>Downgraded two levels because of study limitations (overall unclear or high risk of bias) and limitations of the meta-analysis (AMSTAR  $\leq 5$ );

<sup>c</sup>Downgraded one level because of inconsistency (significant heterogeneity or no replication of the results);

<sup>d</sup>Downgraded one level because of imprecision (confidence interval includes negligible or no effects or fewer than 250 participants were included in total);

<sup>e</sup>Downgraded one level because of a probably high risk of publication bias.

For peer review only



**Supplementary information to “Complementary therapies for clinical depression: an overview of systematic reviews”**  
by Heidemarie Haller, Dennis Anheyer, Holger Cramer, Gustav Dobos

**Supplementary table 2: Detailed AMSTAR ratings.**

|                                | Apriori design | Two data extractor and consensus | Comprehensive literature search | Inclusion of grey literature | List of included and excluded studies | Characteristics of studies provided | Adequate risk of bias assessment | Appropriate conclusions | Appropriate data syntheses | Assessment of publication bias | Conflict of interest / funding statement | Sum |
|--------------------------------|----------------|----------------------------------|---------------------------------|------------------------------|---------------------------------------|-------------------------------------|----------------------------------|-------------------------|----------------------------|--------------------------------|------------------------------------------|-----|
| Aalbers 2017 <sup>139</sup>    | 1              | 1                                | 1                               | 1                            | 1                                     | 1                                   | 1                                | 1                       | 1                          | 1                              | 1                                        | 11  |
| Almeida 2015 <sup>140</sup>    | 0              | 1                                | 1                               | 0                            | 0                                     | 1                                   | 1                                | 1                       | 1                          | 0                              | 0                                        | 6   |
| Anderson 2015 <sup>141</sup>   | 0              | 0                                | 1                               | 1                            | 0                                     | 1                                   | 1                                | 1                       | 1                          | 1                              | 0                                        | 7   |
| Apaydin 2016 <sup>142</sup>    | 1              | 1                                | 1                               | 1                            | 0                                     | 1                                   | 1                                | 1                       | 1                          | 0                              | 1                                        | 9   |
| Appleton 2015 <sup>143</sup>   | 0              | 1                                | 1                               | 1                            | 1                                     | 1                                   | 1                                | 1                       | 1                          | 1                              | 0                                        | 9   |
| Bo 2017 <sup>144</sup>         | 0              | 0                                | 1                               | 0                            | 0                                     | 1                                   | 1                                | 1                       | 1                          | 1                              | 0                                        | 6   |
| Cramer 2013 <sup>145</sup>     | 0              | 1                                | 1                               | 1                            | 1                                     | 1                                   | 1                                | 1                       | 0                          | 1                              | 0                                        | 8   |
| Galizia 2016 <sup>146</sup>    | 0              | 1                                | 1                               | 1                            | 1                                     | 1                                   | 1                                | 1                       | 1                          | 1                              | 0                                        | 9   |
| Hausenblas 2013 <sup>147</sup> | 0              | 1                                | 1                               | 1                            | 0                                     | 1                                   | 1                                | 1                       | 1                          | 0                              | 0                                        | 7   |
| Huang 2013 <sup>148</sup>      | 0              | 1                                | 1                               | 0                            | 0                                     | 1                                   | 1                                | 1                       | 1                          | 1                              | 0                                        | 7   |
| Kuyken 2016 <sup>149</sup>     | 0              | 0                                | 1                               | 0                            | 0                                     | 1                                   | 1                                | 1                       | 1                          | 1                              | 0                                        | 6   |
| Linde 2008 <sup>150</sup>      | 0              | 1                                | 1                               | 1                            | 0                                     | 1                                   | 1                                | 1                       | 1                          | 1                              | 0                                        | 8   |
| Liu 2015 <sup>151</sup>        | 0              | 0                                | 1                               | 0                            | 0                                     | 1                                   | 0                                | 1                       | 0                          | 1                              | 0                                        | 4   |
| Martensson 2015 <sup>152</sup> | 0              | 1                                | 1                               | 0                            | 1                                     | 1                                   | 0                                | 1                       | 0                          | 0                              | 0                                        | 5   |
| Meekums 2015 <sup>153</sup>    | 0              | 1                                | 1                               | 1                            | 1                                     | 1                                   | 1                                | 1                       | 1                          | 1                              | 0                                        | 9   |
| Mukai 2014 <sup>154</sup>      | 0              | 1                                | 1                               | 0                            | 0                                     | 1                                   | 0                                | 1                       | 0                          | 0                              | 0                                        | 4   |
| Ng 2017 <sup>155</sup>         | 0              | 1                                | 1                               | 0                            | 0                                     | 1                                   | 1                                | 1                       | 1                          | 0                              | 0                                        | 6   |
| Schefft 2017 <sup>156</sup>    | 0              | 1                                | 1                               | 0                            | 0                                     | 1                                   | 0                                | 1                       | 1                          | 0                              | 0                                        | 5   |
| Shaffer 2014 <sup>157</sup>    | 0              | 1                                | 1                               | 1                            | 1                                     | 1                                   | 1                                | 1                       | 0                          | 0                              | 0                                        | 7   |
| Shaw 2002 <sup>158</sup>       | 0              | 1                                | 1                               | 1                            | 1                                     | 1                                   | 0                                | 1                       | 1                          | 0                              | 0                                        | 7   |
| Smith 2018 <sup>51</sup>       | 1              | 1                                | 1                               | 1                            | 1                                     | 1                                   | 1                                | 1                       | 1                          | 1                              | 0                                        | 10  |
| Strauss 2014 <sup>159</sup>    | 0              | 0                                | 1                               | 1                            | 0                                     | 1                                   | 0                                | 0                       | 1                          | 1                              | 0                                        | 5   |
| Taylor 2003 <sup>160</sup>     | 0              | 1                                | 1                               | 1                            | 1                                     | 1                                   | 1                                | 1                       | 1                          | 0                              | 0                                        | 8   |
| Tuunainen 2004 <sup>161</sup>  | 0              | 1                                | 1                               | 1                            | 1                                     | 1                                   | 1                                | 1                       | 1                          | 1                              | 0                                        | 9   |
| Yeung 2014 <sup>162</sup>      | 0              | 1                                | 1                               | 0                            | 0                                     | 0                                   | 1                                | 1                       | 0                          | 0                              | 0                                        | 4   |
| Zhao 2016 <sup>163</sup>       | 0              | 1                                | 1                               | 0                            | 0                                     | 1                                   | 1                                | 1                       | 1                          | 1                              | 0                                        | 7   |



# PRISMA 2009 Checklist

1  
2  
3  
4  
5  
6  
7  
8  
9  
10  
11  
12  
13  
14  
15  
16  
17  
18  
19  
20  
21  
22  
23  
24  
25  
26  
27  
28  
29  
30  
31  
32  
33  
34  
35  
36  
37  
38  
39  
40  
41  
42  
43  
44  
45  
46  
47

| Section/topic                      | #  | Checklist item                                                                                                                                                                                                                                                                                              | Reported on page # |
|------------------------------------|----|-------------------------------------------------------------------------------------------------------------------------------------------------------------------------------------------------------------------------------------------------------------------------------------------------------------|--------------------|
| <b>TITLE</b>                       |    |                                                                                                                                                                                                                                                                                                             |                    |
| Title                              | 1  | Identify the report as a systematic review, meta-analysis, or both.                                                                                                                                                                                                                                         | 1                  |
| <b>ABSTRACT</b>                    |    |                                                                                                                                                                                                                                                                                                             |                    |
| Structured summary                 | 2  | Provide a structured summary including, as applicable: background; objectives; data sources; study eligibility criteria, participants, and interventions; study appraisal and synthesis methods; results; limitations; conclusions and implications of key findings; systematic review registration number. | 2                  |
| <b>INTRODUCTION</b>                |    |                                                                                                                                                                                                                                                                                                             |                    |
| Rationale                          | 3  | Describe the rationale for the review in the context of what is already known.                                                                                                                                                                                                                              | 4                  |
| Objectives                         | 4  | Provide an explicit statement of questions being addressed with reference to participants, interventions, comparisons, outcomes, and study design (PICOS).                                                                                                                                                  | 4                  |
| <b>METHODS</b>                     |    |                                                                                                                                                                                                                                                                                                             |                    |
| Protocol and registration          | 5  | Indicate if a review protocol exists, if and where it can be accessed (e.g., Web address), and, if available, provide registration information including registration number.                                                                                                                               | 5                  |
| Eligibility criteria               | 6  | Specify study characteristics (e.g., PICOS, length of follow-up) and report characteristics (e.g., years considered, language, publication status) used as criteria for eligibility, giving rationale.                                                                                                      | 5                  |
| Information sources                | 7  | Describe all information sources (e.g., databases with dates of coverage, contact with study authors to identify additional studies) in the search and date last searched.                                                                                                                                  | 6                  |
| Search                             | 8  | Present full electronic search strategy for at least one database, including any limits used, such that it could be repeated.                                                                                                                                                                               | 6                  |
| Study selection                    | 9  | State the process for selecting studies (i.e., screening, eligibility, included in systematic review, and, if applicable, included in the meta-analysis).                                                                                                                                                   | 6                  |
| Data collection process            | 10 | Describe method of data extraction from reports (e.g., piloted forms, independently, in duplicate) and any processes for obtaining and confirming data from investigators.                                                                                                                                  | 6                  |
| Data items                         | 11 | List and define all variables for which data were sought (e.g., PICOS, funding sources) and any assumptions and simplifications made.                                                                                                                                                                       | 6                  |
| Risk of bias in individual studies | 12 | Describe methods used for assessing risk of bias of individual studies (including specification of whether this was done at the study or outcome level), and how this information is to be used in any data synthesis.                                                                                      | 6-7                |
| Summary measures                   | 13 | State the principal summary measures (e.g., risk ratio, difference in means).                                                                                                                                                                                                                               | 7                  |
| Synthesis of results               | 14 | Describe the methods of handling data and combining results of studies, if done, including measures of consistency (e.g., I <sup>2</sup> ) for each meta-analysis.                                                                                                                                          | 7                  |



# PRISMA 2009 Checklist

Page 1 of 2

| Section/topic                 | #  | Checklist item                                                                                                                                                                                           | Reported on page # |
|-------------------------------|----|----------------------------------------------------------------------------------------------------------------------------------------------------------------------------------------------------------|--------------------|
| Risk of bias across studies   | 15 | Specify any assessment of risk of bias that may affect the cumulative evidence (e.g., publication bias, selective reporting within studies).                                                             | N.a.               |
| Additional analyses           | 16 | Describe methods of additional analyses (e.g., sensitivity or subgroup analyses, meta-regression), if done, indicating which were pre-specified.                                                         | N.a.               |
| <b>RESULTS</b>                |    |                                                                                                                                                                                                          |                    |
| Study selection               | 17 | Give numbers of studies screened, assessed for eligibility, and included in the review, with reasons for exclusions at each stage, ideally with a flow diagram.                                          | 8                  |
| Study characteristics         | 18 | For each study, present characteristics for which data were extracted (e.g., study size, PICOS, follow-up period) and provide the citations.                                                             | 8-9                |
| Risk of bias within studies   | 19 | Present data on risk of bias of each study and, if available, any outcome level assessment (see item 12).                                                                                                | 8-9                |
| Results of individual studies | 20 | For all outcomes considered (benefits or harms), present, for each study: (a) simple summary data for each intervention group (b) effect estimates and confidence intervals, ideally with a forest plot. | 9-18               |
| Synthesis of results          | 21 | Present results of each meta-analysis done, including confidence intervals and measures of consistency.                                                                                                  | 19-29              |
| Risk of bias across studies   | 22 | Present results of any assessment of risk of bias across studies (see Item 15).                                                                                                                          | N.a.               |
| Additional analysis           | 23 | Give results of additional analyses, if done (e.g., sensitivity or subgroup analyses, meta-regression [see Item 16]).                                                                                    | N.a.               |
| <b>DISCUSSION</b>             |    |                                                                                                                                                                                                          |                    |
| Summary of evidence           | 24 | Summarize the main findings including the strength of evidence for each main outcome; consider their relevance to key groups (e.g., healthcare providers, users, and policy makers).                     | 18-19              |
| Limitations                   | 25 | Discuss limitations at study and outcome level (e.g., risk of bias), and at review-level (e.g., incomplete retrieval of identified research, reporting bias).                                            | 19-50              |
| Conclusions                   | 26 | Provide a general interpretation of the results in the context of other evidence, and implications for future research.                                                                                  | 21-22              |
| <b>FUNDING</b>                |    |                                                                                                                                                                                                          |                    |
| Funding                       | 27 | Describe sources of funding for the systematic review and other support (e.g., supply of data); role of funders for the systematic review.                                                               | 23                 |

From: Moher D, Liberati A, Tetzlaff J, Altman DG, The PRISMA Group (2009). Preferred Reporting Items for Systematic Reviews and Meta-Analyses: The PRISMA Statement. PLoS Med 6(7): e1000097. doi:10.1371/journal.pmed1000097

For more information, visit: [www.prisma-statement.org](http://www.prisma-statement.org).

Page 2 of 2

For peer review only - <http://bmjopen.bmj.com/site/about/guidelines.xhtml>
