# Supplementary material for: Complementary therapies for clinical depression: an overview of systematic reviews
Source: PubMed Central journal article supplement — BMJ Open. 2019 Aug 5;9(8):e028527. doi: 10.1136/bmjopen-2018-028527 (PMC6686993; doi:10.1136/bmjopen-2018-028527), 2019-08-05
Supplement: bmjopen-2018-028527supp001.pdf [file bmjopen-2018-028527supp001.pdf]

## Supplementary information to “Complementary therapies for clinical depression: an overview of systematic reviews”

by Heidemarie Haller, Dennis Anheyer, Holger Cramer, Gustav Dobos

Supplementary table 1: Characteristics and outcomes of the included meta-analyses.

| Included meta-analysis    | Diagnosis                | Number of studies | Studies with low risk of bias | Quality of the meta-analyses                         | Instruments used | Follow-up time | Pooled treatment effects (respective latest follow-up) with quality of evidence ratings according to GRADE | Safety                                                                                                                                                                                                                                                                                                                                                                                                                                                                                                                                                                                                                                                                                                                                                                                                                                                                                                                                                                                                                                                                                                                                                                                                                                                                                                                                                                                                                     |                                                                                                                                                                                                                                                                                                                                                                                                                                                                                                    |
|---------------------------|--------------------------|-------------------|-------------------------------|------------------------------------------------------|------------------|----------------|------------------------------------------------------------------------------------------------------------|----------------------------------------------------------------------------------------------------------------------------------------------------------------------------------------------------------------------------------------------------------------------------------------------------------------------------------------------------------------------------------------------------------------------------------------------------------------------------------------------------------------------------------------------------------------------------------------------------------------------------------------------------------------------------------------------------------------------------------------------------------------------------------------------------------------------------------------------------------------------------------------------------------------------------------------------------------------------------------------------------------------------------------------------------------------------------------------------------------------------------------------------------------------------------------------------------------------------------------------------------------------------------------------------------------------------------------------------------------------------------------------------------------------------------|----------------------------------------------------------------------------------------------------------------------------------------------------------------------------------------------------------------------------------------------------------------------------------------------------------------------------------------------------------------------------------------------------------------------------------------------------------------------------------------------------|
| <b>Acupuncture</b>        |                          |                   |                               |                                                      |                  |                |                                                                                                            |                                                                                                                                                                                                                                                                                                                                                                                                                                                                                                                                                                                                                                                                                                                                                                                                                                                                                                                                                                                                                                                                                                                                                                                                                                                                                                                                                                                                                            |                                                                                                                                                                                                                                                                                                                                                                                                                                                                                                    |
| <b>Manual acupuncture</b> | Smith 2018 <sup>51</sup> | MDD, CSD          | 49 RCTs                       | SB: 9<br>PB: 9<br>DB: 5<br>AB: 24<br>RB: 2<br>OB: 15 | AMSTAR: 10       | HAMD<br>BDI    | 1.5-12 weeks                                                                                               | <p>Severity:</p> <ul style="list-style-type: none"> <li>– Sign. greater effects than TAU (4 RCTs; SMD=-0.56; 95%CI=[-0.98,-0.15]; I<sup>2</sup>=62%; p=.03; N=458; ⊕○○○ very low<sup>a,c,d,e</sup>)</li> <li>– No sign. effects versus invasive SHAM (7 RCTs; SMD=-0.43; 95%CI=[-0.95,0.08]; I<sup>2</sup>=80%; p&lt;.001; N=418; ⊕○○○ very low<sup>a,c,d,e</sup>)#</li> <li>– Similar effects as SSRI/TCA (19 RCTs; SMD=-0.24; 95%CI=[-0.51,0.02]; I<sup>2</sup>=87%; p&lt;.001; N=1967; ⊕○○○ very low<sup>a,c,e</sup>)<sup>§</sup></li> <li>– Sign. greater effects as adjunctive to SSRI versus SSRI (8 RCTs; SMD=-1.32; 95%CI=[-2.09,-0.55]; I<sup>2</sup>=93%; p&lt;.001; N=539; ⊕○○○ very low<sup>a,c,e</sup>)</li> </ul> <p>Remission:</p> <ul style="list-style-type: none"> <li>– No sign. effects versus TAU (2 RCTs; RR=1.67; 95%CI=[0.77,3.65]; I<sup>2</sup>=0%; p=.44; N=94; ⊕○○○ very low<sup>a,d,e</sup>)</li> <li>– No sign. effects versus invasive SHAM (5 RCTs; RR=1.89; 95%CI=[0.75,4.75]; I<sup>2</sup>=63; p=.03; N=368; ⊕○○○ very low<sup>a,c,d,e</sup>)</li> <li>– Sign. smaller effects than SSRI/TCA (18 RCTs; RR=1.21; 95%CI=[1.06,1.39]; I<sup>2</sup>=18%; p=.24; N=1952; ⊕⊕○○ low<sup>a,e</sup>)<sup>§</sup></li> <li>– No sign. effects as adjunctive to SSRI versus SSRI (5 RCTs; RR=1.33; 95%CI=[0.65,2.73]; I<sup>2</sup>=76%; p=.002; N=299; ⊕○○○ very low<sup>a,c,e</sup>)</li> </ul> | <ul style="list-style-type: none"> <li>– Similar AEs as TAU (1 RCT; RR=0.89; 95%CI=[0.35,2.24]; I<sup>2</sup>=n.c.; N=320)</li> <li>– Similar AEs as invasive SHAM (1 RCT; RR=2.5; 95%CI=[0.15,40.37]; I<sup>2</sup>=n.c.; N=17)</li> <li>– Similar AEs adjunctive to SSRI versus SSRI (2 RCTs; SMD=-0.37; 95%CI=[-1.2,0.47]; I<sup>2</sup>=84%; N=150)</li> <li>– Sign. less AEs than SSRI (3 RCTs; SMD=-1.75; 95%CI=[-3.17,-0.32]; I<sup>2</sup>=96%; p p&lt;.001; N=481)<sup>#</sup></li> </ul> |

Supplementary table 1: continued

2

|                           | Included meta-analysis    | Diagnosis | Number of studies | Studies with low risk of bias                                  | Quality of the meta-analyses | Instruments used | Follow-up time | Pooled treatment effects (respective latest follow-up) with quality of evidence ratings according to GRADE                                                                                                                                                                                                                                                                                                                                                                                                                                                                                                                                                                                                                                                                                                                                                                                                                                                                                                                                                                                                                                                                                                                                     | Safety                                                                                                                                                                                                                                                                               |
|---------------------------|---------------------------|-----------|-------------------|----------------------------------------------------------------|------------------------------|------------------|----------------|------------------------------------------------------------------------------------------------------------------------------------------------------------------------------------------------------------------------------------------------------------------------------------------------------------------------------------------------------------------------------------------------------------------------------------------------------------------------------------------------------------------------------------------------------------------------------------------------------------------------------------------------------------------------------------------------------------------------------------------------------------------------------------------------------------------------------------------------------------------------------------------------------------------------------------------------------------------------------------------------------------------------------------------------------------------------------------------------------------------------------------------------------------------------------------------------------------------------------------------------|--------------------------------------------------------------------------------------------------------------------------------------------------------------------------------------------------------------------------------------------------------------------------------------|
| <b>Electroacupuncture</b> | Smith 2018 <sup>51</sup>  | MDD, CSD  | 21 RCTs           | SB: 6<br>PB: 3<br>DB: 5<br>AB: 16<br>RB: 1<br>OB: 12           | AMSTAR: 10                   | HAMD<br>BDI      | 2-6 weeks      | <p>Severity:</p> <ul style="list-style-type: none"> <li>– Sign. greater effects than TAU (1 RCT; SMD=-1.26; 95%CI=[-2.10,-0.43]; I<sup>2</sup>=n.c.; N=30; ⊕○○○ very low<sup>a,c,d,e</sup>)</li> <li>– No sign. effects versus invasive SHAM (5 RCTs; SMD=0.12; 95%CI=[-0.14,0.38]; I<sup>2</sup>=0%; p=.82; N=251; ⊕○○○ very low<sup>a,d,e</sup>)<sup>#</sup></li> <li>– Sign. greater effects than SSRI/TCA (10 RCTs; SMD=-0.28; 95%CI=[-0.47,-0.09]; I<sup>2</sup>=33%; p=.14; N=995; ⊕⊕○○ low<sup>a,e</sup>)<sup>§</sup></li> <li>– Sign. greater effects as adjunctive to SSRI versus SSRI (5 RCTs; SMD=-0.84; 95%CI=[-1.16,-0.51]; I<sup>2</sup>=33%; p=.20; N=274; ⊕⊕○○ low<sup>a,e</sup>)</li> </ul> <p>Remission:</p> <ul style="list-style-type: none"> <li>– No sign. effects versus invasive SHAM (2 RCTs; RR=1.23; 95%CI=[0.35,4.29]; I<sup>2</sup>=20; p=.26; N=87; ⊕○○○ very low<sup>a,d,e</sup>)</li> <li>– Similar effects as SSRI/TCA (8 RCTs; RR=1.01; 95%CI=[0.92,1.11]; I<sup>2</sup>=0%; p=.43; N=966; ⊕⊕○○ low<sup>a,e</sup>)<sup>§</sup></li> <li>– No sign. effects as adjunctive to SSRI versus SSRI (5 RCTs; RR=1.17; 95%CI=[0.75,1.80]; I<sup>2</sup>=49%; p=.10; N=273; ⊕○○○ very low<sup>a,d,e</sup>)</li> </ul> | <ul style="list-style-type: none"> <li>– Similar AEs as invasive SHAM (4 RCTs; RR=1.79; 95%CI=[0.99,3.25]; I<sup>2</sup>=16%; p=.31; N=244)</li> <li>– Sign. less AEs as adjunctive to SSRI versus SSRI (1 RCT; SMD=-3.39; 95%CI=[-4.27,-2.50]; I<sup>2</sup>=n.c.; N=50)</li> </ul> |
| <b>Herbs</b>              |                           |           |                   |                                                                |                              |                  |                |                                                                                                                                                                                                                                                                                                                                                                                                                                                                                                                                                                                                                                                                                                                                                                                                                                                                                                                                                                                                                                                                                                                                                                                                                                                |                                                                                                                                                                                                                                                                                      |
| <b>St. John's wort</b>    | Linde 2008 <sup>150</sup> | MDD       | 29 RCTs           | SB: 18<br>PB: 29<br>DB: n.r.<br>AB: 29<br>RB: n.r.<br>OB: n.r. | AMSTAR: 8                    | HAMD<br>MADRS    | 4-12 weeks     | <p>Response (50%):</p> <ul style="list-style-type: none"> <li>– Sign. greater effects than PLACEBO (18 RCTs; RR=1.48; 95%CI=[1.23,1.77]; I<sup>2</sup>=75%; p&lt;.001; N=3064; ⊕⊕⊕○ moderate<sup>c</sup>)</li> <li>– Similar effects as SSRI/TCA/TECA (17 RCTs; RR=1.01; 95%CI=[0.93,1.09]; I<sup>2</sup>=17%; p=.25; N=2810; ⊕⊕⊕○ moderate<sup>a</sup>)</li> </ul>                                                                                                                                                                                                                                                                                                                                                                                                                                                                                                                                                                                                                                                                                                                                                                                                                                                                            | <ul style="list-style-type: none"> <li>– Similar AEs as PLACEBO (14 RCTs; OR=0.98; 95%CI=[0.78,1.23]; I<sup>2</sup>=n.r.; N=2496),</li> <li>– Sign. less than ADMs (14 RCTs; OR=0.56; 95%CI=[0.43,0.74]; I<sup>2</sup>=n.r.; N=2663)</li> </ul>                                      |

Supplementary table 1: continued

3

|                                       | Included meta-analysis         | Diagnosis | Number of studies | Studies with low risk of bias                            | Quality of the meta-analyses | Instruments used | Follow-up time | Pooled treatment effects (respective latest follow-up) with quality of evidence ratings according to GRADE                                                                                                                                                                                                                                                                                                                                                                                                                                                                                                                                                                                                                                                                                                                                                                                                                                                                                                                                                                                                                                                                                                                                                                                                                                                                                        | Safety                                                                                                                                                                                                                                          |
|---------------------------------------|--------------------------------|-----------|-------------------|----------------------------------------------------------|------------------------------|------------------|----------------|---------------------------------------------------------------------------------------------------------------------------------------------------------------------------------------------------------------------------------------------------------------------------------------------------------------------------------------------------------------------------------------------------------------------------------------------------------------------------------------------------------------------------------------------------------------------------------------------------------------------------------------------------------------------------------------------------------------------------------------------------------------------------------------------------------------------------------------------------------------------------------------------------------------------------------------------------------------------------------------------------------------------------------------------------------------------------------------------------------------------------------------------------------------------------------------------------------------------------------------------------------------------------------------------------------------------------------------------------------------------------------------------------|-------------------------------------------------------------------------------------------------------------------------------------------------------------------------------------------------------------------------------------------------|
| <b>St. John's wort</b><br>(continued) | Apaydin 2016 <sup>142</sup>    | MDD       | 35 RCTs           | SB: 9<br>PB: 27<br>DB: 5<br>AB: 26<br>RB: 3<br>OB: 33    | AMSTAR: 9                    | HAMD             | 4-32 weeks     | <p>Severity:</p> <ul style="list-style-type: none"> <li>– Sign. greater effects than PLACEBO (16 RCTs; SMD=-0.49; 95%CI=[-0.74,-0.23]; I<sup>2</sup>=89%; p=n.r.; N=2888; ⊕⊕⊕○ moderate<sup>c</sup>)</li> <li>– Similar effects as ADM (14 RCTs; SMD=-0.03; 95%CI=[-0.21,0.15]; I<sup>2</sup>=74%; p=n.r.; N=2248; ⊕⊕○○ low<sup>a,c</sup>)</li> </ul> <p>Response (50%):</p> <ul style="list-style-type: none"> <li>– Sign. greater effects than PLACEBO (18 RCTs; RR=1.53; 95%CI=[1.19,1.97]; I<sup>2</sup>=79%; p=n.r.; N=2922; ⊕⊕⊕○ moderate<sup>c</sup>)</li> <li>– Similar effects as ADM (17 RCTs; RR=1.01; 95%CI=[0.90,1.14]; I<sup>2</sup>=52%; p=n.r.; N=2776; ⊕⊕⊕○ moderate<sup>a</sup>)</li> </ul> <p>Remission:</p> <ul style="list-style-type: none"> <li>– No sign. effects versus PLACEBO (9 RCTs; RR=1.69; 95%CI=[0.63,4.55]; I<sup>2</sup>=94%; p=n.r.; N=1419; ⊕○○○ very low<sup>a,c,d</sup>)</li> <li>– Similar effects as ADM (7 RCTs; RR=1.17; 95%CI=[0.84,1.62]; I<sup>2</sup>=29%; p=n.r.; N=787; ⊕⊕⊕○ moderate<sup>a</sup>)</li> </ul> <p>Relapse:</p> <ul style="list-style-type: none"> <li>– No sign. effects versus PLACEBO (1 RCT; RR=0.70; 95%CI=[0.49,1.02]; I<sup>2</sup>=n.c.; N=426; ⊕○○○ very low<sup>a,c,d</sup>)</li> <li>– Similar effects as ADM (1 RCT; RR=4.17; 95%CI=[0.47,33.33]; I<sup>2</sup>=n.c.; N=241; ⊕○○○ very low<sup>a,c,d</sup>)</li> </ul> | <ul style="list-style-type: none"> <li>– Similar AEs as PLACEBO (13 RCTs; OR=0.83; 95%CI=[0.62,1.13]; I<sup>2</sup>=n.r.; N=2600),</li> <li>– Sign. less than ADMs (11 RCTs; OR=0.67; 95%CI=[0.56,0.81]; I<sup>2</sup>=n.r.; N=1946)</li> </ul> |
| <b>Saffron</b>                        | Hausenblas 2013 <sup>147</sup> | MDD       | 5 RCTs            | SB: 5<br>PB: 5<br>DB: 5<br>AB: 5<br>RB: n.r.<br>OB: n.r. | AMSTAR: 7                    | HAMD             | 6-8 weeks      | <p>Severity:</p> <ul style="list-style-type: none"> <li>– Sign. greater effects than PLACEBO (2 RCTs; SMD=-1.62; 95%CI=[-2.14,-1.10]; I<sup>2</sup>=0%; p=n.r.; N=71; ⊕○○○ very low<sup>c,d,e</sup>)</li> <li>– Similar effects as SSRI/TCA (3 RCTs; SMD=-0.15; 95%CI=[-0.52,0.22]; I<sup>2</sup>=0%; p=n.r.; N=106; ⊕○○○ very low<sup>c,d,e</sup>)</li> </ul>                                                                                                                                                                                                                                                                                                                                                                                                                                                                                                                                                                                                                                                                                                                                                                                                                                                                                                                                                                                                                                    | <ul style="list-style-type: none"> <li>– No serious AEs</li> </ul>                                                                                                                                                                              |

Supplementary table 1: continued

|                           | Included meta-analysis         | Diagnosis | Number of studies | Studies with low risk of bias                             | Quality of the meta-analyses | Instruments used | Follow-up time  | Pooled treatment effects (respective latest follow-up) with quality of evidence ratings according to GRADE                                                                                                                                                                                                                                                                                                                                                                                                                                                                                                                                      | Safety                                                                                                                                                                                                        |
|---------------------------|--------------------------------|-----------|-------------------|-----------------------------------------------------------|------------------------------|------------------|-----------------|-------------------------------------------------------------------------------------------------------------------------------------------------------------------------------------------------------------------------------------------------------------------------------------------------------------------------------------------------------------------------------------------------------------------------------------------------------------------------------------------------------------------------------------------------------------------------------------------------------------------------------------------------|---------------------------------------------------------------------------------------------------------------------------------------------------------------------------------------------------------------|
| <b>Curcuma</b>            | Ng 2017 <sup>155</sup>         | MDD, CSD  | 6 RCTs            | SB: 3<br>PB: 3<br>DB: 3<br>AB: 2<br>RB: 2<br>OB: 1        | AMSTAR: 6                    | HAMD, BDI        | 4-8 weeks       | Severity:<br>– Sign. greater effects than PLACEBO (6 RCTs; SMD=-0.34; 95%CI=[-0.56,-0.13]; I <sup>2</sup> =0%; p=.82; N=377; ⊕○○○ very low <sup>a,d,e</sup> )                                                                                                                                                                                                                                                                                                                                                                                                                                                                                   | – No serious AEs                                                                                                                                                                                              |
| <b>Chinese herbs</b>      | Yeung 2014 <sup>162</sup>      | MND       | 21 RCTs           | SB: 5<br>PB: 11<br>DB: 9<br>AB: 21<br>RB: 20<br>OB: 18    | AMSTAR: 4                    | HAMD             | 6-8,5 weeks     | Severity:<br>– Sign. greater effects than PLACEBO (4 RCTs; SMD=-1.27; 95%CI=[-1.67,-0.87]; I <sup>2</sup> =44%; p=.14; N=251; ⊕○○○ very low <sup>b,e</sup> )#<br>– Similar effects as SSRI/SNRI/TCA/TECA (9 RCTs; SMD=0.17; 95%CI=[-0.12,0.46]; I <sup>2</sup> =82%; p<.001; N=1962; ⊕○○○ very low <sup>b,c,e</sup> )#<br>Response (30%):<br>– Sign. greater effects than PLACEBO (3 RCTs; RR=2.99; 95%CI=[2.18,4.10]; I <sup>2</sup> =0%; p=.53; N=281; ⊕○○○ very low <sup>c,d,e</sup> )<br>– Similar effects as SSRI/SNRI/TCA/TECA (10 RCTs; RR=1.00; 95%CI=[0.94,1.07]; I <sup>2</sup> =42%; p=.08; N=1635; ⊕○○○ very low <sup>b,c,e</sup> ) | – Similar AEs as PLACEBO (3 RCTs; RR=1.29; 95%CI=[0.86,1.95]; I <sup>2</sup> =61%; p= n.r.; N=n.r.)<br>– Sign. less AEs than ADMs (29 RCTs; RR=0.23; 95%CI=[0.16,0.33]; I <sup>2</sup> =59%; p= n.r.; N=n.r.) |
| <b>Light therapy</b>      |                                |           |                   |                                                           |                              |                  |                 |                                                                                                                                                                                                                                                                                                                                                                                                                                                                                                                                                                                                                                                 |                                                                                                                                                                                                               |
| <b>Bright white light</b> | Tuunainen 2004 <sup>161</sup>  | MND       | 18                | SB: 2<br>PB: 0<br>DB: 13<br>AB: 1<br>RB: n.r.<br>OB: n.r. | AMSTAR: 9                    | HAMD, GDS        | 1 day - 8 weeks | Severity:<br>– Sign. greater effects than adjunctive to ADM than SHAM + ADM (18 RCTs; SMD=-0.20; 95%CI=[-0.38,-0.01]; I <sup>2</sup> =60%; p<.001; N=505; ⊕○○○ very low <sup>a,c,d</sup> )<br>Response:<br>– No effects than adjunctive to ADM than SHAM + ADM (3 RCTs; RR=0.94; 95%CI=[0.61,1.46]; I <sup>2</sup> =69%; p=.004; N=71; ⊕○○○ very low <sup>a,c,d</sup> )                                                                                                                                                                                                                                                                         | – No serious AEs                                                                                                                                                                                              |
|                           | Martensson 2015 <sup>152</sup> | SAD       | 8 RCTs            | N.r.                                                      | AMSTAR: 5                    | HAMD, SIGH-SAD   | 2-6 weeks       | Severity:<br>– Sign. greater effects than SHAM (8 RCTs; SMD=-0.54; 95%CI=[-0.95,-0.13]; I <sup>2</sup> =n.r.; N=179; ⊕○○○ very low <sup>b,c,d,e</sup> )                                                                                                                                                                                                                                                                                                                                                                                                                                                                                         | – N.r.                                                                                                                                                                                                        |

Supplementary table 1: continued

5

|                                        | Included meta-analysis      | Diagnosis | Number of studies | Studies with low risk of bias                      | Quality of the meta-analyses | Instruments used    | Follow-up time | Pooled treatment effects (respective latest follow-up) with quality of evidence ratings according to GRADE                                                                                                                                                                                                                | Safety           |
|----------------------------------------|-----------------------------|-----------|-------------------|----------------------------------------------------|------------------------------|---------------------|----------------|---------------------------------------------------------------------------------------------------------------------------------------------------------------------------------------------------------------------------------------------------------------------------------------------------------------------------|------------------|
| <b>Meditative movement therapies</b>   |                             |           |                   |                                                    |                              |                     |                |                                                                                                                                                                                                                                                                                                                           |                  |
| <b>Dance therapy</b>                   | Meekums 2015 <sup>153</sup> | MND       | 2 RCTs            | SB: 1<br>PB: 0<br>DB: 1<br>AB: 2<br>RB: 2<br>OB: 1 | AMSTAR: 9                    | HAMD                | 4-12 weeks     | Severity:<br>– Sign. greater effects as adjunctive to ADM versus ADM (2 RCTs; SMD=-1.06; 95%CI=[-1.46,-0.65]; I <sup>2</sup> =0%; p=.70; N=107; ⊕⊕○○ low <sup>d,c</sup> )#                                                                                                                                                | – No serious AEs |
| <b>Qi Gong and Tai Chi</b>             | Liu 2015 <sup>151</sup>     | MDD, CSD  | 5 RCTs            | N.r.                                               | AMSTAR: 4                    | HAMD, GDS, CESD     | 10-16 weeks    | Severity:<br>– Sign. greater effects than TAU for Qi Gong (2 RCTs; SMD=-1.27; 95%CI=[-2.09,-0.45]; I <sup>2</sup> =74%; p=.05; N=120; ⊕○○○ very low <sup>b,c,d,e</sup> )* but no sign. effects for Tai Chi (3 RCTs; SMD=-0.61; 95%CI=[-1.55,0.34]; I <sup>2</sup> =78%; p=.01; N=120; ⊕○○○ very low <sup>b,c,d,e</sup> )* | – N.r.           |
| <b>Yoga</b>                            | Cramer 2013 <sup>145</sup>  | MDD, CSD  | 5 RCTs            | SB: 0<br>PB: 0<br>DB: 1<br>AB: 1<br>RB: 5<br>OB: 3 | AMSTAR: 8                    | HAMD, ZGS, GDS, BDI | 4-8 weeks      | Severity:<br>– Sign. greater effects than TAU (4 RCTs; SMD=-1.03; 95%CI=[-1.90,-0.16]; I <sup>2</sup> =82%; p<.001; N=141; ⊕○○○ very low <sup>a,c,d,e</sup> )*<br>– Sign. greater effects than EXERCISE (2 RCTs; SMD=-0.59; 95%CI=[-1.90,-0.16]; I <sup>2</sup> =68%; p=.08; N=108; ⊕○○○ very low <sup>a,c,d,e</sup> )    | – N.r.           |
| <b>Mindfulness-based interventions</b> |                             |           |                   |                                                    |                              |                     |                |                                                                                                                                                                                                                                                                                                                           |                  |
| <b>MBCT</b>                            | Strauss 2014 <sup>159</sup> | MDD       | 4 RCTs            | N.r.                                               | AMSTAR: 5                    | HAMD, BDI           | 8-12 weeks     | Severity:<br>– Sign. greater effects than TAU (3 RCTs; SMD=-0.97; 95%CI=[-1.81,-0.12]; I <sup>2</sup> =72%; p=.03; N=115; ⊕○○○ very low <sup>b,c,d</sup> ) <sup>§</sup><br>– Similar effects as CBT (1 RCT; SMD=-0.16; 95%CI=[-0.75,0.43]; I <sup>2</sup> =n.c.; N=45; ⊕○○○ very low <sup>b,c,d</sup> ) <sup>§</sup>      | – N.r.           |

Supplementary table 1: continued

6

|                            | Included meta-analysis      | Diagnosis | Number of studies | Studies with low risk of bias                         | Quality of the meta-analyses | Instruments used | Follow-up time | Pooled treatment effects (respective latest follow-up) with quality of evidence ratings according to GRADE                                                                                                                                                                                                                    | Safety                                                                                |
|----------------------------|-----------------------------|-----------|-------------------|-------------------------------------------------------|------------------------------|------------------|----------------|-------------------------------------------------------------------------------------------------------------------------------------------------------------------------------------------------------------------------------------------------------------------------------------------------------------------------------|---------------------------------------------------------------------------------------|
| <b>MBCT</b><br>(continued) | Kuyken 2016 <sup>149</sup>  | MDD       | 4 RCTs            | SB: 4<br>PB: 0<br>DB: 3<br>AB: 4<br>RB: 4<br>OB: 4    | AMSTAR: 6                    | SCID, BDI        | 60 weeks       | Relapse:<br>– Sign. greater effects than ADM (4 RCTs; HR=0.77; 95%CI=[0.60,0.98]; I <sup>2</sup> =0%; p=.92; N=669; ⊕⊕⊕○ moderate <sup>d</sup> )                                                                                                                                                                              | – No serious AEs                                                                      |
| <b>MBSR</b>                | Bo 2017 <sup>144</sup>      | CSD       | 5 RCTs            | SB: 0<br>PB: 0<br>DB: 1<br>AB: 5<br>RB: 5<br>OB: n.r. | AMSTAR: 6                    | HAMD, GDS        | 8-12 weeks     | Severity:<br>– Sign. greater effects than TAU/enhanced TAU (5 RCTs; SMD=-1.09; 95%CI=[-1.41,-0.76]; I <sup>2</sup> =56%; p=.06; N=396; ⊕⊕○ low <sup>a,c</sup> )                                                                                                                                                               | – N.r.                                                                                |
| <b>Music therapy</b>       |                             |           |                   |                                                       |                              |                  |                |                                                                                                                                                                                                                                                                                                                               |                                                                                       |
| <b>Music therapy</b>       | Zhao 2016 <sup>163</sup>    | MND       | 8 RCTs            | SB: 0<br>PB: 0<br>DB: 0<br>AB: 8<br>RB: 7<br>OB: 8    | AMSTAR: 7                    | HAMD, GDS, HADS  | 4-52 weeks     | Severity:<br>– Sign. greater effects than TAU (5 RCTs; SMD=-0.57; 95%CI=[-1.03,-0.11]; I <sup>2</sup> =76%; p<.001; N=244; ⊕○○○ very low <sup>a,c,d</sup> )*<br>– Sign. greater effects as adjunctive to ADM versus ADM (3 RCTs; SMD=-0.88; 95%CI=[-1.07,-0.68]; I <sup>2</sup> =0%; p=.63; N=257; ⊕⊕○○ low <sup>a,e</sup> )* | – N.r.                                                                                |
|                            | Aalbers 2017 <sup>139</sup> | MDD, CSD  | 8 RCTs            | SB: 2<br>PB: 1<br>DB: 1<br>AB: 7<br>RB: 2<br>OB: 3    | AMSTAR: 11                   | HAMD             | 12 weeks       | Severity:<br>– Sign. greater effects than TAU (4 RCTs; SMD=-0.98; 95%CI=[-1.69,-0.27]; I <sup>2</sup> =83%; p<.001; N=219; ⊕○○○ very low <sup>a,c,d</sup> )<br>– Similar effects as CBT (4 RCTs; SMD=-1.28; 95%CI=[-3.57,1.02]; I <sup>2</sup> =96%; p<.001; N=131; ⊕○○○ very low <sup>a,c,d</sup> )                          | – Similar AEs as TAU (1 RCT; OR=0.45; 95%CI=[0.02,11.46]; I <sup>2</sup> =n.c.; N=79) |

Supplementary table 1: continued

7

|                                      | Included meta-analysis       | Diagnosis | Number of studies | Studies with low risk of bias                          | Quality of the meta-analyses | Instruments used                 | Follow-up time | Pooled treatment effects (respective latest follow-up) with quality of evidence ratings according to GRADE                                                                                                                                                                                                                                                                                                                                                                                                                                                                                                                                                                                                                                                         | Safety                                                                                              |
|--------------------------------------|------------------------------|-----------|-------------------|--------------------------------------------------------|------------------------------|----------------------------------|----------------|--------------------------------------------------------------------------------------------------------------------------------------------------------------------------------------------------------------------------------------------------------------------------------------------------------------------------------------------------------------------------------------------------------------------------------------------------------------------------------------------------------------------------------------------------------------------------------------------------------------------------------------------------------------------------------------------------------------------------------------------------------------------|-----------------------------------------------------------------------------------------------------|
| <b>Religious/spiritual therapies</b> |                              |           |                   |                                                        |                              |                                  |                |                                                                                                                                                                                                                                                                                                                                                                                                                                                                                                                                                                                                                                                                                                                                                                    |                                                                                                     |
| <b>Faith-adapted CBT</b>             | Anderson 2015 <sup>141</sup> | MDD, CSD  | 9 RCTs            | SB: 0<br>PB: 0<br>DB: 4<br>AB: 4<br>RB: 9<br>OB: 0     | AMSTAR: 7                    | N.r.                             | N.r.           | Severity:<br>– Sign. greater effects than TAU (6 RCTs; SMD=-0.69; 95%CI=[-1.21,-0.17]; I <sup>2</sup> =82%; p=.004; N=304; ⊕○○○ very low <sup>a,c,d</sup> ) <sup>§</sup><br>– Sign. greater effects than CBT (6 RCTs; SMD=-0.54; 95%CI=[-0.82,-0.25]; I <sup>2</sup> =0%; p=.78; N=199; ⊕⊕○○ low <sup>a,e</sup> ) <sup>§</sup>                                                                                                                                                                                                                                                                                                                                                                                                                                     | – N.r.                                                                                              |
| <b>Supplements</b>                   |                              |           |                   |                                                        |                              |                                  |                |                                                                                                                                                                                                                                                                                                                                                                                                                                                                                                                                                                                                                                                                                                                                                                    |                                                                                                     |
| <b>Inositol</b>                      | Mukai 2014 <sup>155</sup>    | MDD       | 2 RCTs            | N.r.                                                   | AMSTAR: 4                    | HAMD                             | 4 weeks        | Severity:<br>– No sign. effects as adjunctive to SSRI versus PLACEBO + SSRI (2 RCTs; SMD=0.17; 95%CI=[-0.33,0.66]; I <sup>2</sup> =0%; p=.93; N=78; ⊕○○○ very low <sup>b,d,e</sup> )                                                                                                                                                                                                                                                                                                                                                                                                                                                                                                                                                                               | – Similar AEs as adjunctive to ADM (1 RCT; RR=3.21; 95%CI=[0.14,72.55]; I <sup>2</sup> =n.c.; N=36) |
| <b>Omega-3 fatty acids</b>           | Appleton 2015 <sup>143</sup> | MDD       | 26 RCTs           | SB: 15<br>PB: 6<br>DB: 19<br>AB: 8<br>RB: 16<br>OB: 25 | AMSTAR: 9                    | HAMD, MADRS, BDI, GDS, HSCL, IDS | 4-16 weeks     | Severity:<br>– Sign. greater effects than PLACEBO (25 RCTs; SMD=-0.30; 95%CI=[-0.50,-0.10]; I <sup>2</sup> =59%; p<.001; N=1373; ⊕○○○ very low <sup>a,c,d,e</sup> )<br>– Similar effects as SSRI (1 RCT; SMD=-0.08; 95%CI=[-0.70,0.54]; I <sup>2</sup> =n.c.; N=40; ⊕○○○ very low <sup>a,c,d,e</sup> )<br>Response (50%):<br>– No sign. effects versus PLACEBO (15 RCTs; OR=1.39; 95%CI=[0.95,2.04]; I <sup>2</sup> =6%; p=.38; N=611; ⊕○○○ very low <sup>a,d,e</sup> )<br>– Similar effects as SSRI (1 RCT; OR=1.23; 95%CI=[0.35,4.31]; I <sup>2</sup> =n.c.; N=40; ⊕○○○ very low <sup>a,c,d,e</sup> )<br>Remission:<br>– No sign. effects versus PLACEBO (6 RCTs; OR=1.38; 95%CI=[0.87,2.20]; I <sup>2</sup> =7%; p=.37; N=426; ⊕○○○ very low <sup>a,d,e</sup> ) | – Similar AEs as PLACEBO (19 RCT; OR=1.24; 95%CI=[0.95,1.62]; I <sup>2</sup> =0%; p=.66; N=1207)    |

Supplementary table 1: continued

|                              | Included meta-analysis      | Diagnosis | Number of studies | Studies with low risk of bias                               | Quality of the meta-analyses | Instruments used | Follow-up time | Pooled treatment effects (respective latest follow-up) with quality of evidence ratings according to GRADE                                                                                                                                                                                                                                                                                                                                                                                     | Safety                                                                                                                                                                                                                                                                                    |
|------------------------------|-----------------------------|-----------|-------------------|-------------------------------------------------------------|------------------------------|------------------|----------------|------------------------------------------------------------------------------------------------------------------------------------------------------------------------------------------------------------------------------------------------------------------------------------------------------------------------------------------------------------------------------------------------------------------------------------------------------------------------------------------------|-------------------------------------------------------------------------------------------------------------------------------------------------------------------------------------------------------------------------------------------------------------------------------------------|
| <b>Probiotics</b>            | Huang 2016 <sup>148</sup>   | MDD       | 1 RCTs            | SB: 1<br>PB: 1<br>DB: 1<br>AB: 1<br>RB: 1<br>OB: 1          | AMSTAR: 7                    | BDI              | 8 weeks        | Severity:<br>– Sign. greater effects than PLACEBO (1 RCT; SMD=-0.73; 95%CI=[-1.37,-0.09]; I <sup>2</sup> =n.c.; N=40; ⊕○○○ very low <sup>c,d,e</sup> )                                                                                                                                                                                                                                                                                                                                         | – N.r.                                                                                                                                                                                                                                                                                    |
| <b>S-adenosyl methionine</b> | Galizia 2016 <sup>146</sup> | MDD       | 8 RCTs            | SB: 2<br>PB: 4<br>DB: 4<br>AB: 3<br>RB: 8<br>OB: 8          | AMSTAR: 9                    | HAMD             | 6-12 weeks     | Severity:<br>– No sign. effects versus PLACEBO (2 RCTs; SMD=-0.54; 95%CI=[-1.54,0.46]; I <sup>2</sup> =72%; p=.06; N=142; ⊕○○○ very low <sup>c,d,e</sup> )<br>– Similar effects as SSRI/TCA (5 RCTs; SMD=-0.01; 95%CI=[-0.22,0.21]; I <sup>2</sup> =43%; p=.14; N=821; ⊕⊕○○ low <sup>a,e</sup> ) <sup>§</sup><br>– Sign. effects as adjunctive to SSRI versus PLACEBO + SSRI (1 RCT; SMD=-0.59; 95%CI=[-1.06,-0.12]; I <sup>2</sup> =n.c.; N=73; ⊕○○○ very low <sup>c,d,e</sup> ) <sup>#</sup> | – Similar AEs as PLACEBO (2 RCTs; RR=0.70; 95%CI=[0.16,3.01]; I <sup>2</sup> =n.r.; N=142)<br>– Similar AEs as adjunctive to ADM (1 RCT, RR=0.58; 95%CI=[0.10,3.28]; I <sup>2</sup> =n.c.; N=73)<br>– Similar AEs as ADM (2 RCTs, RR=0.75; 95%CI=[0.20,2.79]; I <sup>2</sup> =n.r.; N=52) |
| <b>Tryptophan</b>            | Shaw 2002 <sup>158</sup>    | CSD       | 2 RCTs            | SB: 2<br>PB: 2<br>DB: n.r.<br>AB: 1<br>RB: n.r.<br>OB: n.r. | AMSTAR: 7                    | HAMD             | 3-12 weeks     | Response:<br>– Sign. greater effects than PLACEBO (2 RCTs; OR=4.10; 95%CI=[1.28,13.15]; I <sup>2</sup> =0%; p=.32; N=46; ⊕○○○ very low <sup>a,d,e</sup> )                                                                                                                                                                                                                                                                                                                                      | – Sign. greater AEs than PLACEBO (2 RCTs; OR=7.41; 95%CI=[1.01,54.19]; I <sup>2</sup> =0%; p=1.0; N=64)                                                                                                                                                                                   |
| <b>Vitamin B9 (Folate)</b>   | Taylor 2003 <sup>160</sup>  | MDD       | 2 RCTs            | SB: 0<br>PB: 2<br>DB: n.r.<br>AB: 2<br>RB: n.r.<br>OB: n.r. | AMSTAR: 8                    | HAMD             | 10-24 weeks    | Severity:<br>– Sign. greater effects as adjunctive to SSRI versus PLACEBO + SSRI (2 RCTs; SMD=-0.40; 95%CI=[-0.76,-0.05]; I <sup>2</sup> =0%; p=.96; N=124; ⊕○○○ very low <sup>a,c,d,e</sup> ) <sup>#</sup>                                                                                                                                                                                                                                                                                    | – Similar AEs as PLACEBO (1 RCT; RR=0.76; 95%CI=[0.55,1.05]; I <sup>2</sup> =n.c.; N=127)                                                                                                                                                                                                 |



Supplementary table 1: continued

9

|                                                                                                                                                                                                                                                                                                                                                                                                                                                                                                                                                                                                                                                                                                                                                                                                                                                                                                                                                                                                                                                                                                                                                                                                                                                                                                                                                                                                                                                                                                                                                                             | Included meta-analysis      | Diagnosis | Number of studies | Studies with low risk of bias                            | Quality of the meta-analyses | Instruments used | Follow-up time | Pooled treatment effects (respective latest follow-up) with quality of evidence ratings according to GRADE                                                                                                                                                                                                                                                                                                                                                                                                                                                                   | Safety |
|-----------------------------------------------------------------------------------------------------------------------------------------------------------------------------------------------------------------------------------------------------------------------------------------------------------------------------------------------------------------------------------------------------------------------------------------------------------------------------------------------------------------------------------------------------------------------------------------------------------------------------------------------------------------------------------------------------------------------------------------------------------------------------------------------------------------------------------------------------------------------------------------------------------------------------------------------------------------------------------------------------------------------------------------------------------------------------------------------------------------------------------------------------------------------------------------------------------------------------------------------------------------------------------------------------------------------------------------------------------------------------------------------------------------------------------------------------------------------------------------------------------------------------------------------------------------------------|-----------------------------|-----------|-------------------|----------------------------------------------------------|------------------------------|------------------|----------------|------------------------------------------------------------------------------------------------------------------------------------------------------------------------------------------------------------------------------------------------------------------------------------------------------------------------------------------------------------------------------------------------------------------------------------------------------------------------------------------------------------------------------------------------------------------------------|--------|
| <b>Vitamin B9 (Folate)</b><br>(continued)                                                                                                                                                                                                                                                                                                                                                                                                                                                                                                                                                                                                                                                                                                                                                                                                                                                                                                                                                                                                                                                                                                                                                                                                                                                                                                                                                                                                                                                                                                                                   | Almeida 2015 <sup>140</sup> | MDD       | 5 RCTs            | SB: 4<br>PB: 5<br>DB: 4<br>AB: 3<br>RB: 4<br>OB: 1       | AMSTAR: 6                    | HAMD, MADRS      | 4-52 weeks     | Severity:<br>– No sign. effects as adjunctive to SSRI versus PLACEBO + SSRI (5 RCTs; SMD=-0.12; 95%CI=[-0.45,0.22]; I <sup>2</sup> =66%; p=.02; N=505; ⊕○○○ very low <sup>c,d,e</sup> )<br>Response (50%):<br>– No sign. effects as adjunctive to SSRI versus PLACEBO + SSRI (4 RCTs; OR=1.18; 95%CI=[0.49,2.83]; I <sup>2</sup> =73%; p=.001; N=478; ⊕○○○ very low <sup>c,d,e</sup> )<br>Relapse:<br>– Sign. greater effects as adjunctive to SSRI versus PLACEBO + SSRI (1 RCT, OR=0.33; 95%CI=[0.12, 0.94]; I <sup>2</sup> =n.c.; N=153; ⊕○○○ very low <sup>c,d,e</sup> ) | – N.r. |
| <b>Vitamin D</b>                                                                                                                                                                                                                                                                                                                                                                                                                                                                                                                                                                                                                                                                                                                                                                                                                                                                                                                                                                                                                                                                                                                                                                                                                                                                                                                                                                                                                                                                                                                                                            | Shaffer 2014 <sup>157</sup> | MDD, CSD  | 2 RCTs            | SB: 0<br>PB: 0<br>DB: 1<br>AB: 0<br>RB: n.r.<br>OB: n.r. | AMSTAR: 7                    | HAMD, BDI        | 8 weeks        | Severity:<br>– Sign. greater effects than PLACEBO (2 RCTs; SMD=-0.60; 95%CI=[-1.19,-0.01]; I <sup>2</sup> =n.r.; N=149; ⊕○○○ very low <sup>a,c,d,e</sup> )                                                                                                                                                                                                                                                                                                                                                                                                                   | – N.r. |
| <b>Zinc</b>                                                                                                                                                                                                                                                                                                                                                                                                                                                                                                                                                                                                                                                                                                                                                                                                                                                                                                                                                                                                                                                                                                                                                                                                                                                                                                                                                                                                                                                                                                                                                                 | Schefft 2017 <sup>156</sup> | MDD       | 3 RCTs            | N.r.                                                     | AMSTAR: 5                    | HAMD, BDI        | 6-12 weeks     | Severity:<br>– Sign. greater effects as adjunctive to SSRI/TCA versus SSRI/TCA (3 RCTs; SMD=-0.66; 95%CI=[-1.06,-0.26]; I <sup>2</sup> =0%; p=.45; N=104; ⊕○○○ very low <sup>b,d,e</sup> )                                                                                                                                                                                                                                                                                                                                                                                   | – N.r. |
| Abbreviations: AB: Attrition bias; ADM: Antidepressant medication; AE: Adverse events; AMSTAR: Assessment of the Methodological Quality of Systematic Reviews tool; BDI: Beck Depression Inventory; CBT: Cognitive Behavioral Therapy; CESD: Center for Epidemiologic Studies Depression Scale; CSD: Clinical symptoms of depression (questionnaire based diagnosis); DB: Detection bias; GDS: Geriatric Depression Scale; HADS: Hospital Anxiety and Depression Scale; HAMD: Hamilton Rating Scale for Depression; HR: Hazard ratio; HSCL: Hopkins Symptom Checklist Depression Scale; I <sup>2</sup> : Heterogeneity; IDS: Inventory of Depressive Symptomology; MADRS: Montgomery-Asberg Depression Rating Scale; MBCT: Mindfulness-based Cognitive Therapy; MBSR: Mindfulness-based Stress Reduction; MDD: Major depressive disorder; MND: Mixed non-seasonal depression; N: Number of patients; N.c.: Not calculable because of only one included RCT; N.r.: Not reported; OB: Other bias; OR: Odds ratio; PB: Performance bias; RCT: Randomized controlled trial; RB: Reporting bias; RR: Risk ratio; SAD: Seasonal Affective Disorder; SB: Selection bias; SCID: Structured Clinical Interview; SIGH-SAD: Structured Interview Guide for the Hamilton Depression Rating Scale-Seasonal Affective Disorders; SMD: Standard mean difference; SSRI: Selective serotonin reuptake inhibitors; SNRI: Serotonin-norepinephrine reuptake inhibitor; TAU: Treatment as usual; TCA: Tricyclic antidepressants; TECA: Tetracyclic antidepressants; ZGS: Zung Depression Scale. |                             |           |                   |                                                          |                              |                  |                |                                                                                                                                                                                                                                                                                                                                                                                                                                                                                                                                                                              |        |

Supplementary table 1: continued

10

## Notes:

\*Newly calculated effect measure of selected RCTs meeting eligibility criteria;

#Newly calculated effect measure from mean differences (MDs);

§Newly calculated effect measure from originally separate/combined analyses.

<sup>a</sup>Downgraded one level because of study limitations (overall unclear or high risk of bias);

<sup>b</sup>Downgraded two levels because of study limitations (overall unclear or high risk of bias) and limitations of the meta-analysis (AMSTAR  $\leq 5$ );

<sup>c</sup>Downgraded one level because of inconsistency (significant heterogeneity or no replication of the results);

<sup>d</sup>Downgraded one level because of imprecision (confidence interval includes negligible or no effects or fewer than 250 participants were included in total);

<sup>e</sup>Downgraded one level because of a probably high risk of publication bias.
