# Supplementary material for: Complementary therapies for clinical depression: an overview of systematic reviews
Source: PubMed Central journal article supplement — BMJ Open. 2019 Aug 5;9(8):e028527. doi: 10.1136/bmjopen-2018-028527 (PMC6686993; doi:10.1136/bmjopen-2018-028527), 2019-08-05
Supplement: bmjopen-2018-028527supp002.pdf [file bmjopen-2018-028527supp002.pdf]

## Supplementary information to “Complementary therapies for clinical depression: an overview of systematic reviews”

by Heidemarie Haller, Dennis Anheyer, Holger Cramer, Gustav Dobos

Supplementary table 2: Detailed AMSTAR ratings.

|                                | Apriori design | Two data extractor and consensus | Comprehensive literature search | Inclusion of grey literature | List of included and excluded studies | Characteristics of studies provided | Adequate risk of bias assessment | Appropriate conclusions | Appropriate data syntheses | Assessment of publication bias | Conflict of interest / funding statement | Sum |
|--------------------------------|----------------|----------------------------------|---------------------------------|------------------------------|---------------------------------------|-------------------------------------|----------------------------------|-------------------------|----------------------------|--------------------------------|------------------------------------------|-----|
| Aalbers 2017 <sup>139</sup>    | 1              | 1                                | 1                               | 1                            | 1                                     | 1                                   | 1                                | 1                       | 1                          | 1                              | 1                                        | 11  |
| Almeida 2015 <sup>140</sup>    | 0              | 1                                | 1                               | 0                            | 0                                     | 1                                   | 1                                | 1                       | 1                          | 0                              | 0                                        | 6   |
| Anderson 2015 <sup>141</sup>   | 0              | 0                                | 1                               | 1                            | 0                                     | 1                                   | 1                                | 1                       | 1                          | 1                              | 0                                        | 7   |
| Apaydin 2016 <sup>142</sup>    | 1              | 1                                | 1                               | 1                            | 0                                     | 1                                   | 1                                | 1                       | 1                          | 0                              | 1                                        | 9   |
| Appleton 2015 <sup>143</sup>   | 0              | 1                                | 1                               | 1                            | 1                                     | 1                                   | 1                                | 1                       | 1                          | 1                              | 0                                        | 9   |
| Bo 2017 <sup>144</sup>         | 0              | 0                                | 1                               | 0                            | 0                                     | 1                                   | 1                                | 1                       | 1                          | 1                              | 0                                        | 6   |
| Cramer 2013 <sup>145</sup>     | 0              | 1                                | 1                               | 1                            | 1                                     | 1                                   | 1                                | 1                       | 0                          | 1                              | 0                                        | 8   |
| Galizia 2016 <sup>146</sup>    | 0              | 1                                | 1                               | 1                            | 1                                     | 1                                   | 1                                | 1                       | 1                          | 1                              | 0                                        | 9   |
| Hausenblas 2013 <sup>147</sup> | 0              | 1                                | 1                               | 1                            | 0                                     | 1                                   | 1                                | 1                       | 1                          | 0                              | 0                                        | 7   |
| Huang 2013 <sup>148</sup>      | 0              | 1                                | 1                               | 0                            | 0                                     | 1                                   | 1                                | 1                       | 1                          | 1                              | 0                                        | 7   |
| Kuyken 2016 <sup>149</sup>     | 0              | 0                                | 1                               | 0                            | 0                                     | 1                                   | 1                                | 1                       | 1                          | 1                              | 0                                        | 6   |
| Linde 2008 <sup>150</sup>      | 0              | 1                                | 1                               | 1                            | 0                                     | 1                                   | 1                                | 1                       | 1                          | 1                              | 0                                        | 8   |
| Liu 2015 <sup>151</sup>        | 0              | 0                                | 1                               | 0                            | 0                                     | 1                                   | 0                                | 1                       | 0                          | 1                              | 0                                        | 4   |
| Martensson 2015 <sup>152</sup> | 0              | 1                                | 1                               | 0                            | 1                                     | 1                                   | 0                                | 1                       | 0                          | 0                              | 0                                        | 5   |
| Meekums 2015 <sup>153</sup>    | 0              | 1                                | 1                               | 1                            | 1                                     | 1                                   | 1                                | 1                       | 1                          | 1                              | 0                                        | 9   |
| Mukai 2014 <sup>154</sup>      | 0              | 1                                | 1                               | 0                            | 0                                     | 1                                   | 0                                | 1                       | 0                          | 0                              | 0                                        | 4   |
| Ng 2017 <sup>155</sup>         | 0              | 1                                | 1                               | 0                            | 0                                     | 1                                   | 1                                | 1                       | 1                          | 0                              | 0                                        | 6   |
| Schefft 2017 <sup>156</sup>    | 0              | 1                                | 1                               | 0                            | 0                                     | 1                                   | 0                                | 1                       | 1                          | 0                              | 0                                        | 5   |
| Shaffer 2014 <sup>157</sup>    | 0              | 1                                | 1                               | 1                            | 1                                     | 1                                   | 1                                | 1                       | 0                          | 0                              | 0                                        | 7   |
| Shaw 2002 <sup>158</sup>       | 0              | 1                                | 1                               | 1                            | 1                                     | 1                                   | 0                                | 1                       | 1                          | 0                              | 0                                        | 7   |
| Smith 2018 <sup>51</sup>       | 1              | 1                                | 1                               | 1                            | 1                                     | 1                                   | 1                                | 1                       | 1                          | 1                              | 0                                        | 10  |
| Strauss 2014 <sup>159</sup>    | 0              | 0                                | 1                               | 1                            | 0                                     | 1                                   | 0                                | 0                       | 1                          | 1                              | 0                                        | 5   |
| Taylor 2003 <sup>160</sup>     | 0              | 1                                | 1                               | 1                            | 1                                     | 1                                   | 1                                | 1                       | 1                          | 0                              | 0                                        | 8   |
| Tuunainen 2004 <sup>161</sup>  | 0              | 1                                | 1                               | 1                            | 1                                     | 1                                   | 1                                | 1                       | 1                          | 1                              | 0                                        | 9   |
| Yeung 2014 <sup>162</sup>      | 0              | 1                                | 1                               | 0                            | 0                                     | 0                                   | 1                                | 1                       | 0                          | 0                              | 0                                        | 4   |
| Zhao 2016 <sup>163</sup>       | 0              | 1                                | 1                               | 0                            | 0                                     | 1                                   | 1                                | 1                       | 1                          | 1                              | 0                                        | 7   |
